# Supplementary material
Source: publisher figshare collection journal article supplement (https://gsapubs.figshare.com/ndownloader/files/23319644)
Supplement: Supplementary file 1 [file 23319644]

## Sheet: FULL RAW DATA
TABLE DR11. 40AR/39AR FULL RAW DATA
						Isotope intensities and 1 sigma uncertainties																																	Decay post irradiation		Interfering correction factors
Run ID	Sample	System	Run_Date	Run_Hour	Laser power	Ar40	Ar40_Er	Ar39	Ar39_Er	Ar38	Ar38_Er	Ar37	Ar37_Er	Ar36	Ar36_Er	Ar36_ICFactor	Ar36_ICFactorEr	Ar40_Blank	Ar40_BlankEr	Ar39_Blank	Ar39_BlankEr	Ar38_Blank	Ar38_BlankEr	Ar37_Blank	Ar37_BlankEr	Ar36_Blank	Ar36_BlankEr	40Ar*/39ArK	40Ar*/39ArK err	%40Ar*	%40Ar* err	Age	Age_Er	Age_Er_with_J_er	Ar39_Moles	Irradiation	J	J_Er	37_Decay	39_Decay	Ca_39_Over_37	Ca_39_Over_37_Er	Ca_38_Over_37	Ca_38_Over_37_Er	Ca_36_Over_37	Ca_36_Over_37_Er	K_38_Over_39	K_38_Over_39_Er	K_40_Over_39
					Watts	fA	fA	fA	fA	fA	fA	fA	fA	fA	fA																	Ma	Ma	Ma
61414-04A	CM-SS4	ARGUS VI (Obama)	2012-12-08	11.45	0.1	641.756	0.0796927	157.568	0.0271505	1.8998	0.068	0.733719	0.0470794	0.0023319	0.0005007	1.05821	0.0009102	2.46701	0.0524493	0.01695	0.0028	0.0174	0.06	0.0177	0.022	0.0085963	0.0004035	4.06079	0.0012843	99.9007	0.0292919	69.6171	0.0216042	0.0878526	1.57568e-17	NM-254E	0.009546	1.19e-05	1.80541	1.00021	0.000698	7.8e-06	4e-05	2e-06	0.000273	2e-07	0.0123	0	0.008068
61414-04B	CM-SS4	ARGUS VI (Obama)	2012-12-08	11.6833	0.2	606.093	0.0881732	149.037	0.0271505	1.7658	0.0694622	0.6071	0.0470887	0.0004708	0.0004815	1.05821	0.0009102	2.4637	0.052283	0.01695	0.0028	0.0174	0.06	0.0177	0.022	0.0085861	0.0004022	4.05806	0.0013532	99.9848	0.0315217	69.5711	0.0227631	0.0880915	1.49037e-17	NM-254E	0.009546	1.19e-05	1.80577	1.00021	0.000698	7.8e-06	4e-05	2e-06	0.000273	2e-07	0.0123	0	0.008068
61414-04C	CM-SS4	ARGUS VI (Obama)	2012-12-08	11.9333	0.3	811.985	0.089697	199.001	0.0261559	2.3908	0.0710211	0.871817	0.0461535	-0.0001586	0.0004924	1.05821	0.0009102	2.46041	0.0521206	0.01695	0.0028	0.0174	0.06	0.0177	0.022	0.0085759	0.000401	4.07285	0.0010196	100.014	0.0240572	69.8199	0.0171503	0.0871033	1.99001e-17	NM-254E	0.009546	1.19e-05	1.80613	1.00021	0.000698	7.8e-06	4e-05	2e-06	0.000273	2e-07	0.0123	0	0.008068
61414-04D	CM-SS4	ARGUS VI (Obama)	2012-12-08	12.1667	0.5	207.549	0.0620965	50.6842	0.0182203	0.4571	0.0689638	0.189681	0.0471073	0.0006828	0.0004737	1.05821	0.0009102	2.45713	0.0519613	0.01695	0.0028	0.0174	0.06	0.0177	0.022	0.0085657	0.0003997	4.08312	0.0033811	99.908	0.0803032	69.9928	0.0568641	0.102771	5.06842e-18	NM-254E	0.009546	1.19e-05	1.80648	1.00021	0.000698	7.8e-06	4e-05	2e-06	0.000273	2e-07	0.0123	0	0.008068
61414-04E	CM-SS4	ARGUS VI (Obama)	2012-12-08	12.4167	3	91.2275	0.0630855	22.4099	0.0152623	0.1904	0.0699714	0.127563	0.0471166	0.0010184	0.0005031	1.05821	0.0009102	2.45387	0.0518052	0.01695	0.0028	0.0174	0.06	0.0177	0.022	0.0085556	0.0003985	4.04967	0.0077688	99.6766	0.191595	69.43	0.130699	0.15587	2.24099e-18	NM-254E	0.009546	1.19e-05	1.80684	1.00021	0.000698	7.8e-06	4e-05	2e-06	0.000273	2e-07	0.0123	0	0.008068
61414-05A	CM-SS4	ARGUS VI (Obama)	2012-12-08	12.95	0.1	95.3593	0.0611381	22.1887	0.0142803	0.3072	0.0694622	0.203179	0.0471375	0.0005491	0.0004822	1.05821	0.0009102	2.44661	0.0514672	0.01695	0.0028	0.0174	0.06	0.0177	0.022	0.0085331	0.0003959	4.28301	0.0075632	99.846	0.176228	73.3515	0.126968	0.155418	2.21887e-18	NM-254E	0.009546	1.19e-05	1.80764	1.00021	0.000698	7.8e-06	4e-05	2e-06	0.000273	2e-07	0.0123	0	0.008068
61414-05B	CM-SS4	ARGUS VI (Obama)	2012-12-08	13.1833	0.2	745.694	0.0797175	170.722	0.0241679	1.9945	0.0694622	0.704033	0.0471468	0.0006804	0.0004813	1.05821	0.0009102	2.44339	0.0513214	0.01695	0.0028	0.0174	0.06	0.0177	0.022	0.0085231	0.0003948	4.35898	0.0011451	99.9802	0.0246139	74.6263	0.0192103	0.0931602	1.70722e-17	NM-254E	0.009546	1.19e-05	1.808	1.00021	0.000698	7.8e-06	4e-05	2e-06	0.000273	2e-07	0.0123	0	0.008068
61414-05C	CM-SS4	ARGUS VI (Obama)	2012-12-08	13.4333	0.3	383.435	0.0758635	87.4548	0.0211903	0.918	0.0694622	0.436717	0.0481511	0.0008602	0.0004804	1.05821	0.0009102	2.44019	0.0511788	0.01695	0.0028	0.0174	0.06	0.0177	0.022	0.0085131	0.0003937	4.37377	0.0021369	99.9417	0.0468023	74.8744	0.035844	0.0982283	8.74548e-18	NM-254E	0.009546	1.19e-05	1.80835	1.00021	0.000698	7.8e-06	4e-05	2e-06	0.000273	2e-07	0.0123	0	0.008068
61414-05D	CM-SS4	ARGUS VI (Obama)	2012-12-08	13.6667	0.5	300.494	0.0654685	68.4204	0.0192093	0.6797	0.068	0.32611	0.0471653	0.0003235	0.0004677	1.05821	0.0009102	2.43703	0.0510404	0.01695	0.0028	0.0174	0.06	0.0177	0.022	0.0085033	0.0003927	4.38277	0.0025677	99.9759	0.0558427	75.0255	0.0430664	0.101251	6.84204e-18	NM-254E	0.009546	1.19e-05	1.80871	1.00021	0.000698	7.8e-06	4e-05	2e-06	0.000273	2e-07	0.0123	0	0.008068
61414-05E	CM-SS4	ARGUS VI (Obama)	2012-12-08	13.9	3	68.284	0.0585852	15.5282	0.0133009	0.2049	0.0694622	0.0806841	0.0471745	0.0010747	0.0004727	1.05821	0.0009102	2.43386	0.0509041	0.01695	0.0028	0.0174	0.06	0.0177	0.022	0.0084934	0.0003916	4.36917	0.0105192	99.5401	0.2397	74.7973	0.176451	0.198701	1.55282e-18	NM-254E	0.009546	1.19e-05	1.80906	1.00021	0.000698	7.8e-06	4e-05	2e-06	0.000273	2e-07	0.0123	0	0.008068
61414-06A	CM-SS4	ARGUS VI (Obama)	2012-12-08	15.35	0.1	508.857	0.0736882	116.716	0.0231747	1.3871	0.0704911	0.499353	0.0462837	0.0004154	0.0004739	1.05821	0.0009102	2.41492	0.0501393	0.01695	0.0028	0.0174	0.06	0.0177	0.022	0.0084344	0.0003857	4.35101	0.0016178	99.9835	0.0346315	74.4926	0.0271428	0.0949598	1.16716e-17	NM-254E	0.009546	1.19e-05	1.81122	1.00021	0.000698	7.8e-06	4e-05	2e-06	0.000273	2e-07	0.0123	0	0.008068
61414-06B	CM-SS4	ARGUS VI (Obama)	2012-12-08	15.6	0.15	162	0.0653172	37.1838	0.0172327	0.3504	0.0704911	0.117571	0.0472401	-0.000239	0.0004731	1.05821	0.0009102	2.41184	0.0500233	0.01695	0.0028	0.0174	0.06	0.0177	0.022	0.0084248	0.0003848	4.35081	0.0046434	100.049	0.104301	74.4893	0.0779035	0.119787	3.71838e-18	NM-254E	0.009546	1.19e-05	1.81158	1.00021	0.000698	7.8e-06	4e-05	2e-06	0.000273	2e-07	0.0123	0	0.008068
61414-06C	CM-SS4	ARGUS VI (Obama)	2012-12-08	15.8333	0.3	283.84	0.0665357	65.0077	0.0182204	0.7595	0.0689638	0.3584	0.0472494	-0.000141	0.0004663	1.05821	0.0009102	2.40877	0.0499099	0.01695	0.0028	0.0174	0.06	0.0177	0.022	0.0084153	0.000384	4.35929	0.0026692	100.025	0.0592973	74.6316	0.0447781	0.101568	6.50077e-18	NM-254E	0.009546	1.19e-05	1.81193	1.00021	0.000698	7.8e-06	4e-05	2e-06	0.000273	2e-07	0.0123	0	0.008068
61414-06D	CM-SS4	ARGUS VI (Obama)	2012-12-08	16.0667	0.6	269.802	0.0664524	61.6695	0.0201994	0.7163	0.0699714	0.292504	0.0472587	0.0006342	0.0004597	1.05821	0.0009102	2.40571	0.0497988	0.01695	0.0028	0.0174	0.06	0.0177	0.022	0.0084057	0.0003831	4.36423	0.0028559	99.9384	0.06174	74.7144	0.0479081	0.103074	6.16695e-18	NM-254E	0.009546	1.19e-05	1.81229	1.00021	0.000698	7.8e-06	4e-05	2e-06	0.000273	2e-07	0.0123	0	0.008068
61414-06E	CM-SS4	ARGUS VI (Obama)	2012-12-08	16.3167	3	32.1396	0.0556253	7.90664	0.013301	0.1054	0.0694622	0.0886384	0.047268	0.0007151	0.000465	1.05821	0.0009102	2.40267	0.0496908	0.01695	0.0028	0.0174	0.06	0.0177	0.022	0.0083962	0.0003823	4.03083	0.0200761	99.3585	0.496513	69.1131	0.337811	0.348231	7.90664e-19	NM-254E	0.009546	1.19e-05	1.81265	1.00021	0.000698	7.8e-06	4e-05	2e-06	0.000273	2e-07	0.0123	0	0.008068
61414-07A	CM-SS4	ARGUS VI (Obama)	2012-12-08	16.5833	0.1	180.081	0.0595513	41.549	0.0152624	0.4714	0.0704911	0.182755	0.0472786	0.0018027	0.0004583	1.05821	0.0009102	2.39925	0.0495717	0.01695	0.0028	0.0174	0.06	0.0177	0.022	0.0083855	0.0003814	4.31353	0.0039234	99.7091	0.0892835	73.8637	0.0658455	0.111713	4.1549e-18	NM-254E	0.009546	1.19e-05	1.81305	1.00021	0.000698	7.8e-06	4e-05	2e-06	0.000273	2e-07	0.0123	0	0.008068
61414-07B	CM-SS4	ARGUS VI (Obama)	2012-12-08	16.8167	0.15	602.479	0.087357	138.991	0.0251617	1.7793	0.0699714	0.514826	0.0472878	0.0006507	0.0004576	1.05821	0.0009102	2.39624	0.0494696	0.01695	0.0028	0.0174	0.06	0.0177	0.022	0.0083761	0.0003806	4.32551	0.0014066	99.9749	0.0306846	74.0648	0.0236049	0.0935142	1.38991e-17	NM-254E	0.009546	1.19e-05	1.8134	1.00021	0.000698	7.8e-06	4e-05	2e-06	0.000273	2e-07	0.0123	0	0.008068
61414-07C	CM-SS4	ARGUS VI (Obama)	2012-12-08	17.05	0.3	207.415	0.0629156	47.6946	0.0172327	0.5155	0.0704911	0.222186	0.0482951	0.0002448	0.0004512	1.05821	0.0009102	2.39325	0.0493698	0.01695	0.0028	0.0174	0.06	0.0177	0.022	0.0083667	0.0003798	4.33958	0.0034881	99.973	0.0779276	74.3009	0.0585263	0.108001	4.76946e-18	NM-254E	0.009546	1.19e-05	1.81376	1.00021	0.000698	7.8e-06	4e-05	2e-06	0.000273	2e-07	0.0123	0	0.008068
61414-07D	CM-SS4	ARGUS VI (Obama)	2012-12-08	17.3	0.6	422.365	0.0709133	96.884	0.0211904	1.0927	0.0699714	0.357926	0.0493494	-0.0004426	0.0004505	1.05821	0.0009102	2.39023	0.0492716	0.01695	0.0028	0.0174	0.06	0.0177	0.022	0.0083573	0.000379	4.35308	0.0018364	100.038	0.0398257	74.5274	0.0308097	0.0961116	9.6884e-18	NM-254E	0.009546	1.19e-05	1.81412	1.00021	0.000698	7.8e-06	4e-05	2e-06	0.000273	2e-07	0.0123	0	0.008068
61414-07E	CM-SS4	ARGUS VI (Obama)	2012-12-08	17.5333	3	57.3644	0.0581311	13.0161	0.0142803	0.1069	0.0699714	0.0048991	0.0463671	0.0007515	0.0004499	1.05821	0.0009102	2.38722	0.0491755	0.01695	0.0028	0.0174	0.06	0.0177	0.022	0.0083478	0.0003783	4.38187	0.0122209	99.6081	0.274614	75.0104	0.204974	0.224517	1.30161e-18	NM-254E	0.009546	1.19e-05	1.81448	1.00021	0.000698	7.8e-06	4e-05	2e-06	0.000273	2e-07	0.0123	0	0.008068
61414-08A	CM-SS4	ARGUS VI (Obama)	2012-12-08	18.2833	0.1	20.7016	0.0553803	5.21547	0.013301	0.1207	0.0684763	0.0548308	0.0483438	0.0002898	0.0004661	1.05821	0.0009102	2.37809	0.0488976	0.01695	0.0028	0.0174	0.06	0.0177	0.022	0.0083192	0.0003762	3.9457	0.0304043	99.6078	0.771749	67.6801	0.511997	0.518653	5.21547e-19	NM-254E	0.009546	1.19e-05	1.81559	1.00021	0.000698	7.8e-06	4e-05	2e-06	0.000273	2e-07	0.0123	0	0.008068
61414-08B	CM-SS4	ARGUS VI (Obama)	2012-12-08	18.5167	0.15	560.125	0.0765745	128.514	0.024168	1.5364	0.0704911	0.713668	0.0464045	0.001054	0.0004534	1.05821	0.0009102	2.37515	0.0488124	0.01695	0.0028	0.0174	0.06	0.0177	0.022	0.00831	0.0003755	4.34843	0.001462	99.9541	0.0310557	74.4494	0.0245282	0.0941958	1.28514e-17	NM-254E	0.009546	1.19e-05	1.81595	1.00021	0.000698	7.8e-06	4e-05	2e-06	0.000273	2e-07	0.0123	0	0.008068
61414-08C	CM-SS4	ARGUS VI (Obama)	2012-12-08	18.7667	0.3	881.68	0.0844721	203.59	0.0321291	2.502	0.0710211	0.869831	0.048363	-0.0001129	0.0004714	1.05821	0.0009102	2.37221	0.0487291	0.01695	0.0028	0.0174	0.06	0.0177	0.022	0.0083007	0.0003749	4.32312	0.0010586	100.012	0.0210777	74.0247	0.0177642	0.0921661	2.0359e-17	NM-254E	0.009546	1.19e-05	1.81631	1.00021	0.000698	7.8e-06	4e-05	2e-06	0.000273	2e-07	0.0123	0	0.008068
61414-08D	CM-SS4	ARGUS VI (Obama)	2012-12-08	19	0.5	852.524	0.0780235	196.398	0.0281457	2.3768	0.0704911	0.836576	0.047373	0.0006142	0.0004408	1.05821	0.0009102	2.36929	0.0486483	0.01695	0.0028	0.0174	0.06	0.0177	0.022	0.0082916	0.0003743	4.33216	0.0009986	99.9864	0.0202879	74.1765	0.0167567	0.0921558	1.96397e-17	NM-254E	0.009546	1.19e-05	1.81667	1.00021	0.000698	7.8e-06	4e-05	2e-06	0.000273	2e-07	0.0123	0	0.008068
61414-08E	CM-SS4	ARGUS VI (Obama)	2012-12-08	19.25	3	891.996	0.0860238	205.599	0.0301368	2.4647	0.0710211	0.834015	0.0473823	0.0010778	0.0004769	1.05821	0.0009102	2.36641	0.0485706	0.01695	0.0028	0.0174	0.06	0.0177	0.022	0.0082825	0.0003737	4.32924	0.0010307	99.9714	0.0211337	74.1274	0.0172948	0.0921975	2.05599e-17	NM-254E	0.009546	1.19e-05	1.81703	1.00021	0.000698	7.8e-06	4e-05	2e-06	0.000273	2e-07	0.0123	0	0.008068
61414-09A	CM-SS4	ARGUS VI (Obama)	2012-12-08	21.0333	0.1	110.408	0.0577356	25.0028	0.0162466	0.2488	0.0694622	0.12556	0.0474522	0.0002533	0.0004609	1.05821	0.0009102	2.34522	0.0480562	0.01695	0.0028	0.0174	0.06	0.0177	0.022	0.0082157	0.0003697	4.40513	0.0066156	99.94	0.14504	75.4004	0.110936	0.144175	2.50028e-18	NM-254E	0.009546	1.19e-05	1.81971	1.00022	0.000698	7.8e-06	4e-05	2e-06	0.000273	2e-07	0.0123	0	0.008068
61414-09B	CM-SS4	ARGUS VI (Obama)	2012-12-08	21.2833	0.15	320.037	0.0671759	73.1497	0.0192093	0.6803	0.0694622	0.320514	0.0465098	-0.0001903	0.0004543	1.05821	0.0009102	2.34242	0.0479959	0.01695	0.0028	0.0174	0.06	0.0177	0.022	0.0082068	0.0003692	4.36813	0.0023658	100.025	0.051836	74.7799	0.0396848	0.0995902	7.31497e-18	NM-254E	0.009546	1.19e-05	1.82007	1.00022	0.000698	7.8e-06	4e-05	2e-06	0.000273	2e-07	0.0123	0	0.008068
61414-09C	CM-SS4	ARGUS VI (Obama)	2012-12-08	21.5167	0.3	386.525	0.0671347	88.1559	0.0201994	0.967	0.0689638	0.38593	0.0484726	-5.41e-05	0.0004478	1.05821	0.0009102	2.33967	0.0479381	0.01695	0.0028	0.0174	0.06	0.0177	0.022	0.0081981	0.0003688	4.37703	0.0019719	100.012	0.0425223	74.9291	0.0330748	0.0973135	8.81559e-18	NM-254E	0.009546	1.19e-05	1.82042	1.00022	0.000698	7.8e-06	4e-05	2e-06	0.000273	2e-07	0.0123	0	0.008068
61414-09D	CM-SS4	ARGUS VI (Obama)	2012-12-08	21.75	0.5	67.9185	0.0570408	15.412	0.0152624	0.1968	0.0684763	0.0588114	0.0484822	0.0003615	0.0004536	1.05821	0.0009102	2.3369	0.0478817	0.01695	0.0028	0.0174	0.06	0.0177	0.022	0.0081894	0.0003684	4.39214	0.0104731	99.8483	0.232229	75.1826	0.175642	0.198196	1.5412e-18	NM-254E	0.009546	1.19e-05	1.82079	1.00022	0.000698	7.8e-06	4e-05	2e-06	0.000273	2e-07	0.0123	0	0.008068
61414-09E	CM-SS4	ARGUS VI (Obama)	2012-12-08	22	3	57.2661	0.0581073	14.5796	0.0142803	0.1702	0.0689638	0.0231285	0.0474896	0.0023728	0.000493	1.05821	0.0009102	2.33417	0.0478274	0.01695	0.0028	0.0174	0.06	0.0177	0.022	0.0081807	0.0003679	3.87139	0.0114876	98.7657	0.294237	66.4282	0.193579	0.209968	1.45796e-18	NM-254E	0.009546	1.19e-05	1.82115	1.00022	0.000698	7.8e-06	4e-05	2e-06	0.000273	2e-07	0.0123	0	0.008068
61414-10A	CM-SS4	ARGUS VI (Obama)	2012-12-08	22.2333	0.1	136.659	0.0629561	30.6914	0.0162466	0.3595	0.0694622	0.119308	0.047499	0.0008094	0.0004592	1.05821	0.0009102	2.33144	0.0477752	0.01695	0.0028	0.0174	0.06	0.0177	0.022	0.0081721	0.0003675	4.43707	0.0054448	99.8301	0.119702	75.9359	0.0912762	0.130112	3.06914e-18	NM-254E	0.009546	1.19e-05	1.8215	1.00022	0.000698	7.8e-06	4e-05	2e-06	0.000273	2e-07	0.0123	0	0.008068
61414-10B	CM-SS4	ARGUS VI (Obama)	2012-12-08	22.7167	0.15	886.623	0.0897163	204.762	0.0301369	2.433	0.0704911	0.641056	0.0495697	0.0010466	0.0004586	1.05821	0.0009102	2.32606	0.0476762	0.01695	0.0028	0.0174	0.06	0.0177	0.022	0.008155	0.0003668	4.32069	0.0010239	99.9705	0.0211923	73.9839	0.0171831	0.0920078	2.04762e-17	NM-254E	0.009546	1.19e-05	1.82222	1.00022	0.000698	7.8e-06	4e-05	2e-06	0.000273	2e-07	0.0123	0	0.008068
61414-10C	CM-SS4	ARGUS VI (Obama)	2012-12-08	22.95	0.3	357.234	0.0712566	82.3544	0.0201994	0.7975	0.068	0.310021	0.047527	0.0003054	0.000452	1.05821	0.0009102	2.32335	0.0476288	0.01695	0.0028	0.0174	0.06	0.0177	0.022	0.0081464	0.0003664	4.32887	0.002136	99.9806	0.0472415	74.1212	0.0358434	0.0973893	8.23544e-18	NM-254E	0.009546	1.19e-05	1.82258	1.00022	0.000698	7.8e-06	4e-05	2e-06	0.000273	2e-07	0.0123	0	0.008068
61414-10D	CM-SS4	ARGUS VI (Obama)	2012-12-08	23.1833	0.5	94.4139	0.0579066	21.6245	0.0142803	0.2421	0.0699714	0.110105	0.0485395	0.00067	0.0004339	1.05821	0.0009102	2.32066	0.0475833	0.01695	0.0028	0.0174	0.06	0.0177	0.022	0.0081379	0.0003661	4.34917	0.0071587	99.7973	0.162434	74.4619	0.120104	0.150662	2.16245e-18	NM-254E	0.009546	1.19e-05	1.82294	1.00022	0.000698	7.8e-06	4e-05	2e-06	0.000273	2e-07	0.0123	0	0.008068
61414-10E	CM-SS4	ARGUS VI (Obama)	2012-12-08	23.65	3	379.608	0.0726729	87.1623	0.0211904	0.765	0.0684763	0.402292	0.0457	0.0009337	0.0004575	1.05821	0.0009102	2.31557	0.047501	0.01695	0.0028	0.0174	0.06	0.0177	0.022	0.0081217	0.0003654	4.34426	0.002066	99.934	0.0451201	74.3794	0.0346629	0.0972497	8.71623e-18	NM-254E	0.009546	1.19e-05	1.82363	1.00022	0.000698	7.8e-06	4e-05	2e-06	0.000273	2e-07	0.0123	0	0.008068
61414-11A	CM-SS4	ARGUS VI (Obama)	2012-12-08	23.8833	0.1	81.2529	0.0556193	17.9172	0.013301	0.1134	0.0689638	0.10269	0.0475638	0.0005341	0.0004448	1.05821	0.0009102	2.31294	0.0474606	0.01695	0.0028	0.0174	0.06	0.0177	0.022	0.0081133	0.0003651	4.51835	0.008702	99.812	0.190072	77.2979	0.14577	0.173642	1.79172e-18	NM-254E	0.009546	1.19e-05	1.82399	1.00022	0.000698	7.8e-06	4e-05	2e-06	0.000273	2e-07	0.0123	0	0.008068
61414-11B	CM-SS4	ARGUS VI (Obama)	2012-12-09	0.366667	0.15	20.9342	0.138367	4.50822	0.0730694	0.0456	0.134164	-0.0795568	0.0963467	0.0011462	0.0014232	1.05821	0.0009102	2.30777	0.047385	0.01695	0.0028	0.0174	0.06	0.0177	0.022	0.0080969	0.0003645	4.55821	0.123584	98.3338	2.23214	77.9655	2.06946	2.07164	4.50822e-19	NM-254E	0.009546	1.19e-05	1.8247	1.00022	0.000698	7.8e-06	4e-05	2e-06	0.000273	2e-07	0.0123	0	0.008068
61414-11C	CM-SS4	ARGUS VI (Obama)	2012-12-09	0.516667	0.3	650.536	0.0756585	147.482	0.0251617	1.7338	0.0694622	0.757159	0.0475881	0.0001114	0.0004382	1.05821	0.0009102	2.30617	0.0473626	0.01695	0.0028	0.0174	0.06	0.0177	0.022	0.0080917	0.0003644	4.40307	0.0012725	100.004	0.0260992	75.3659	0.0213379	0.094484	1.47482e-17	NM-254E	0.009546	1.19e-05	1.82492	1.00022	0.000698	7.8e-06	4e-05	2e-06	0.000273	2e-07	0.0123	0	0.008068
61414-11D	CM-SS4	ARGUS VI (Obama)	2012-12-09	0.75	0.5	318.831	0.0639445	72.1399	0.0192094	0.6646	0.0662118	0.351183	0.0475974	-5.34e-05	0.000438	1.05821	0.0009102	2.30358	0.0473275	0.01695	0.0028	0.0174	0.06	0.0177	0.022	0.0080835	0.0003641	4.41214	0.0023352	100.013	0.0499606	75.518	0.0391553	0.100193	7.21399e-18	NM-254E	0.009546	1.19e-05	1.82528	1.00022	0.000698	7.8e-06	4e-05	2e-06	0.000273	2e-07	0.0123	0	0.008068
61414-11E	CM-SS4	ARGUS VI (Obama)	2012-12-09	0.983333	3	213.097	0.0645965	48.1519	0.0172328	0.4068	0.0684763	0.250843	0.0486114	0.0002114	0.0004499	1.05821	0.0009102	2.30099	0.0472938	0.01695	0.0028	0.0174	0.06	0.0177	0.022	0.0080752	0.0003638	4.41651	0.0034746	99.9786	0.0763255	75.5913	0.0582581	0.109159	4.81519e-18	NM-254E	0.009546	1.19e-05	1.82564	1.00022	0.000698	7.8e-06	4e-05	2e-06	0.000273	2e-07	0.0123	0	0.008068
61414-12A	CM-SS4	ARGUS VI (Obama)	2012-12-09	1.23333	0.1	96.5648	0.0565214	21.9483	0.0142803	0.3639	0.0684763	0.110108	0.0476162	0.0001269	0.0004376	1.05821	0.0009102	2.29843	0.0472617	0.01695	0.0028	0.0174	0.06	0.0177	0.022	0.008067	0.0003636	4.39035	0.0070826	99.9715	0.158748	75.1525	0.118782	0.150114	2.19483e-18	NM-254E	0.009546	1.19e-05	1.826	1.00022	0.000698	7.8e-06	4e-05	2e-06	0.000273	2e-07	0.0123	0	0.008068
61414-12B	CM-SS4	ARGUS VI (Obama)	2012-12-09	1.46667	0.15	836.953	0.0894805	194.623	0.024168	2.3668	0.0689638	0.782411	0.0476255	0.0005493	0.0004374	1.05821	0.0009102	2.29589	0.047231	0.01695	0.0028	0.0174	0.06	0.0177	0.022	0.0080589	0.0003633	4.29181	0.0009748	99.988	0.0218666	73.4993	0.0163625	0.0912871	1.94623e-17	NM-254E	0.009546	1.19e-05	1.82636	1.00022	0.000698	7.8e-06	4e-05	2e-06	0.000273	2e-07	0.0123	0	0.008068
61414-12C	CM-SS4	ARGUS VI (Obama)	2012-12-09	2.16667	0.3	243.833	0.0665735	56.5366	0.0192094	0.5071	0.0675352	0.28215	0.0457945	6.72e-05	0.000449	1.05821	0.0009102	2.28857	0.0471491	0.01695	0.0028	0.0174	0.06	0.0177	0.022	0.0080355	0.0003627	4.30479	0.0030241	100	0.0672804	73.717	0.0507567	0.103387	5.65366e-18	NM-254E	0.009546	1.19e-05	1.8274	1.00022	0.000698	7.8e-06	4e-05	2e-06	0.000273	2e-07	0.0123	0	0.008068
61414-12D	CM-SS4	ARGUS VI (Obama)	2012-12-09	2.4	0.5	233.884	0.0679825	54.1368	0.0172328	0.4708	0.067082	0.186797	0.0476621	0.0002894	0.0004488	1.05821	0.0009102	2.28608	0.0471235	0.01695	0.0028	0.0174	0.06	0.0177	0.022	0.0080275	0.0003625	4.31082	0.0030955	99.9683	0.0706148	73.8182	0.0519531	0.104084	5.41368e-18	NM-254E	0.009546	1.19e-05	1.82776	1.00022	0.000698	7.8e-06	4e-05	2e-06	0.000273	2e-07	0.0123	0	0.008068
61414-12E	CM-SS4	ARGUS VI (Obama)	2012-12-09	2.63333	3	594.203	0.0778609	137.674	0.0221823	1.5915	0.0689638	0.553371	0.0476714	0.002864	0.0004749	1.05821	0.0009102	2.28359	0.047099	0.01695	0.0028	0.0174	0.06	0.0177	0.022	0.0080195	0.0003623	4.30206	0.0013655	99.8634	0.0303166	73.6712	0.0229187	0.0928865	1.37674e-17	NM-254E	0.009546	1.19e-05	1.82812	1.00022	0.000698	7.8e-06	4e-05	2e-06	0.000273	2e-07	0.0123	0	0.008068
61414-13A	CM-SS4	ARGUS VI (Obama)	2012-12-09	2.88333	0.1	38.7292	0.0537785	9.22415	0.0152624	0.154	0.0675352	0.058694	0.0467246	0.0002163	0.0004306	1.05821	0.0009102	2.28113	0.0470757	0.01695	0.0028	0.0174	0.06	0.0177	0.022	0.0080116	0.0003622	4.18422	0.0166082	99.8473	0.385952	71.6923	0.279064	0.292503	9.22415e-19	NM-254E	0.009546	1.19e-05	1.82848	1.00022	0.000698	7.8e-06	4e-05	2e-06	0.000273	2e-07	0.0123	0	0.008068
61414-13B	CM-SS4	ARGUS VI (Obama)	2012-12-09	3.11667	0.15	487.179	0.0701288	120.746	0.0221823	1.3877	0.0689638	0.474033	0.0476901	0.0004119	0.0004547	1.05821	0.0009102	2.27868	0.0470537	0.01695	0.0028	0.0174	0.06	0.0177	0.022	0.0080038	0.000362	4.026	0.001467	99.9824	0.0346301	69.0317	0.0246851	0.0879859	1.20746e-17	NM-254E	0.009546	1.19e-05	1.82883	1.00022	0.000698	7.8e-06	4e-05	2e-06	0.000273	2e-07	0.0123	0	0.008068
61414-13C	CM-SS4	ARGUS VI (Obama)	2012-12-09	3.58333	0.3	140.952	0.0563136	34.9988	0.0172328	0.4286	0.0684763	0.175453	0.0477087	-0.0003706	0.0004302	1.05821	0.0009102	2.27385	0.047013	0.01695	0.0028	0.0174	0.06	0.0177	0.022	0.0079882	0.0003617	4.02283	0.0044681	100.089	0.107364	68.9785	0.0751872	0.113024	3.49988e-18	NM-254E	0.009546	1.19e-05	1.82954	1.00022	0.000698	7.8e-06	4e-05	2e-06	0.000273	2e-07	0.0123	0	0.008068
61414-13D	CM-SS4	ARGUS VI (Obama)	2012-12-09	3.83333	0.5	83.6775	0.0557535	20.6901	0.0152624	0.1727	0.0689638	0.0887504	0.0477181	0.000262	0.0004359	1.05821	0.0009102	2.27144	0.0469942	0.01695	0.0028	0.0174	0.06	0.0177	0.022	0.0079805	0.0003615	4.03278	0.007457	99.9137	0.182014	69.1458	0.125473	0.151323	2.06901e-18	NM-254E	0.009546	1.19e-05	1.8299	1.00022	0.000698	7.8e-06	4e-05	2e-06	0.000273	2e-07	0.0123	0	0.008068
61414-13E	CM-SS4	ARGUS VI (Obama)	2012-12-09	4.06667	3	361.694	0.0686059	89.2167	0.0192094	0.8741	0.068	0.375754	0.0467704	0.0009115	0.0004543	1.05821	0.0009102	2.26902	0.0469762	0.01695	0.0028	0.0174	0.06	0.0177	0.022	0.0079727	0.0003614	4.04331	0.0019135	99.9323	0.0462087	69.323	0.0321937	0.0907072	8.92167e-18	NM-254E	0.009546	1.19e-05	1.83027	1.00022	0.000698	7.8e-06	4e-05	2e-06	0.000273	2e-07	0.0123	0	0.008068
61414-14A	CM-SS4	ARGUS VI (Obama)	2012-12-09	4.3	0.1	22.5244	0.157179	4.88681	0.0830652	0.2938	0.116619	-0.005858	0.115271	-0.0004179	0.0016279	1.05821	0.0009102	2.26661	0.0469593	0.01695	0.0028	0.0174	0.06	0.0177	0.022	0.0079649	0.0003613	4.62728	0.130775	100.568	2.37481	79.1217	2.18848	2.19061	4.88681e-19	NM-254E	0.009546	1.19e-05	1.83063	1.00022	0.000698	7.8e-06	4e-05	2e-06	0.000273	2e-07	0.0123	0	0.008068
61414-14B	CM-SS4	ARGUS VI (Obama)	2012-12-09	4.66667	0.15	275.087	0.0629834	63.0244	0.0192094	0.6935	0.0653911	0.28658	0.048759	0.0008613	0.000454	1.05821	0.0009102	2.26294	0.0469351	0.01695	0.0028	0.0174	0.06	0.0177	0.022	0.0079531	0.0003611	4.353	0.0027173	99.9146	0.0590472	74.526	0.045587	0.101814	6.30244e-18	NM-254E	0.009546	1.19e-05	1.83118	1.00022	0.000698	7.8e-06	4e-05	2e-06	0.000273	2e-07	0.0123	0	0.008068
61414-14C	CM-SS4	ARGUS VI (Obama)	2012-12-09	5.15	0.3	451.161	0.0664025	103.774	0.0211904	1.098	0.0694622	0.459073	0.048778	0.000217	0.0004475	1.05821	0.0009102	2.25827	0.0469073	0.01695	0.0028	0.0174	0.06	0.0177	0.022	0.007938	0.0003609	4.3392	0.0016898	99.9933	0.0362982	74.2946	0.0283524	0.0950863	1.03774e-17	NM-254E	0.009546	1.19e-05	1.8319	1.00022	0.000698	7.8e-06	4e-05	2e-06	0.000273	2e-07	0.0123	0	0.008068
61414-14D	CM-SS4	ARGUS VI (Obama)	2012-12-09	5.38333	0.5	468.652	0.0745862	107.631	0.024168	1.2025	0.0694622	0.456049	0.0468213	0.0006038	0.0004538	1.05821	0.0009102	2.25593	0.0468946	0.01695	0.0028	0.0174	0.06	0.0177	0.022	0.0079304	0.0003608	4.34485	0.0017379	99.9691	0.0367363	74.3893	0.0291582	0.0954376	1.07631e-17	NM-254E	0.009546	1.19e-05	1.83226	1.00022	0.000698	7.8e-06	4e-05	2e-06	0.000273	2e-07	0.0123	0	0.008068
61414-14E	CM-SS4	ARGUS VI (Obama)	2012-12-09	5.63333	3	545.951	0.0834205	125.96	0.0231748	1.42	0.0694622	0.510201	0.0487972	0.0015568	0.0004668	1.05821	0.0009102	2.25361	0.0468827	0.01695	0.0028	0.0174	0.06	0.0177	0.022	0.0079229	0.0003607	4.32288	0.0015163	99.9221	0.0335503	74.0206	0.0254463	0.0939449	1.2596e-17	NM-254E	0.009546	1.19e-05	1.83262	1.00022	0.000698	7.8e-06	4e-05	2e-06	0.000273	2e-07	0.0123	0	0.008068
61414-15A	CM-SS4	ARGUS VI (Obama)	2012-12-09	5.86667	0.1	12.9637	0.157153	2.96739	0.0880637	-0.2745	0.116619	0.154153	0.117139	-0.0021116	0.0014222	1.05821	0.0009102	2.25131	0.0468717	0.01695	0.0028	0.0174	0.06	0.0177	0.022	0.0079154	0.0003606	4.57547	0.204259	104.923	3.71908	78.2545	3.41983	3.42116	2.96739e-19	NM-254E	0.009546	1.19e-05	1.83298	1.00022	0.000698	7.8e-06	4e-05	2e-06	0.000273	2e-07	0.0123	0	0.008068
61414-15B	CM-SS4	ARGUS VI (Obama)	2012-12-09	6.01667	0.15	242.949	0.0616145	59.2425	0.0162467	0.5714	0.0684763	0.255732	0.0468454	1.72e-05	0.0004472	1.05821	0.0009102	2.24987	0.0468652	0.01695	0.0028	0.0174	0.06	0.0177	0.022	0.0079108	0.0003605	4.09309	0.0027235	100.005	0.0657349	70.1604	0.0458005	0.097265	5.92425e-18	NM-254E	0.009546	1.19e-05	1.8332	1.00022	0.000698	7.8e-06	4e-05	2e-06	0.000273	2e-07	0.0123	0	0.008068
61414-15C	CM-SS4	ARGUS VI (Obama)	2012-12-09	6.25	0.3	898.546	0.0817583	221.147	0.031133	2.517	0.0675352	0.916597	0.0468546	0.0009129	0.000435	1.05821	0.0009102	2.24758	0.0468554	0.01695	0.0028	0.0174	0.06	0.0177	0.022	0.0079033	0.0003605	4.05415	0.0009013	99.9776	0.019519	69.5055	0.0151624	0.0863623	2.21147e-17	NM-254E	0.009546	1.19e-05	1.83356	1.00022	0.000698	7.8e-06	4e-05	2e-06	0.000273	2e-07	0.0123	0	0.008068
61414-15D	CM-SS4	ARGUS VI (Obama)	2012-12-09	6.71667	0.5	472.551	0.0761171	116.342	0.0211905	1.1975	0.0694622	0.56404	0.047832	0.0007918	0.0004349	1.05821	0.0009102	2.24309	0.0468381	0.01695	0.0028	0.0174	0.06	0.0177	0.022	0.0078887	0.0003603	4.05202	0.0014906	99.9589	0.0358091	69.4695	0.025076	0.0886003	1.16342e-17	NM-254E	0.009546	1.19e-05	1.83428	1.00022	0.000698	7.8e-06	4e-05	2e-06	0.000273	2e-07	0.0123	0	0.008068
61414-15E	CM-SS4	ARGUS VI (Obama)	2012-12-09	7.18333	3	697.944	0.0901193	170.068	0.0291412	2.038	0.0689638	0.804633	0.0499165	0.0067189	0.0004874	1.05821	0.0009102	2.23878	0.0468239	0.01695	0.0028	0.0174	0.06	0.0177	0.022	0.0078747	0.0003602	4.08446	0.0012277	99.7218	0.0278288	70.0152	0.0206474	0.0880866	1.70068e-17	NM-254E	0.009546	1.19e-05	1.83497	1.00022	0.000698	7.8e-06	4e-05	2e-06	0.000273	2e-07	0.0123	0	0.008068
61414-16A	CM-SS4	ARGUS VI (Obama)	2012-12-09	7.41667	0.1	1.95245	0.119549	0.18459	0.0550832	0.1012	0.0976166	-0.129758	0.0935838	0.0016429	0.00132	1.05821	0.0009102	2.23655	0.0468175	0.01695	0.0028	0.0174	0.06	0.0177	0.022	0.0078674	0.0003602	7.86407	3.23585	74.4424	21.5644	132.503	52.5947	52.5949	1.8459e-20	NM-254E	0.009546	1.19e-05	1.83533	1.00022	0.000698	7.8e-06	4e-05	2e-06	0.000273	2e-07	0.0123	0	0.008068
61414-16B	CM-SS4	ARGUS VI (Obama)	2012-12-09	7.56667	0.15	46.5949	0.157135	6.55048	0.0640752	0.0218	0.108166	0.139319	0.0935955	0.0002827	0.0011178	1.05821	0.0009102	2.23514	0.0468137	0.01695	0.0028	0.0174	0.06	0.0177	0.022	0.0078628	0.0003601	7.09397	0.0893857	99.8414	0.860336	119.943	1.46286	1.47	6.55048e-19	NM-254E	0.009546	1.19e-05	1.83556	1.00022	0.000698	7.8e-06	4e-05	2e-06	0.000273	2e-07	0.0123	0	0.008068
61414-16C	CM-SS4	ARGUS VI (Obama)	2012-12-09	7.7	0.3	1484.8	0.651683	109.197	0.560129	1.3346	0.161555	0.114183	0.0969301	-0.0005811	0.0015246	1.05821	0.0009102	2.234	0.0468108	0.01695	0.0028	0.0174	0.06	0.0177	0.022	0.0078591	0.0003601	13.5911	0.0701368	100.012	0.0692549	223.298	1.08482	1.11602	1.09197e-17	NM-254E	0.009546	1.19e-05	1.83574	1.00022	0.000698	7.8e-06	4e-05	2e-06	0.000273	2e-07	0.0123	0	0.008068
61414-16D	CM-SS4	ARGUS VI (Obama)	2012-12-09	8.08333	0.5	80.9146	0.215152	6.37044	0.0740691	-0.5589	0.102416	-0.0100998	0.0969612	0.0012302	0.001422	1.05821	0.0009102	2.23042	0.0468027	0.01695	0.0028	0.0174	0.06	0.0177	0.022	0.0078474	0.0003601	12.6343	0.164848	99.5333	0.644719	208.439	2.57052	2.58223	6.37044e-19	NM-254E	0.009546	1.19e-05	1.83633	1.00022	0.000698	7.8e-06	4e-05	2e-06	0.000273	2e-07	0.0123	0	0.008068
61414-16E	CM-SS4	ARGUS VI (Obama)	2012-12-09	8.23333	3	137.756	0.224923	11.09	0.095062	0.3606	0.109836	0.0668507	0.103696	0.0012032	0.001731	1.05821	0.0009102	2.22907	0.0468	0.01695	0.0028	0.0174	0.06	0.0177	0.022	0.007843	0.00036	12.3821	0.117712	99.746	0.44011	204.503	1.83947	1.85522	1.109e-18	NM-254E	0.009546	1.19e-05	1.83656	1.00022	0.000698	7.8e-06	4e-05	2e-06	0.000273	2e-07	0.0123	0	0.008068
61414-17B	CM-SS4	ARGUS VI (Obama)	2012-12-09	8.53333	0.15	49.0234	0.0566903	11.212	0.013301	0.0554	0.067082	0.0631929	0.0469426	-0.0001473	0.0004177	1.05821	0.0009102	2.22638	0.0467952	0.01695	0.0028	0.0174	0.06	0.0177	0.022	0.0078342	0.00036	4.36862	0.0132626	100.098	0.302716	74.788	0.222471	0.240497	1.1212e-18	NM-254E	0.009546	1.19e-05	1.837	1.00022	0.000698	7.8e-06	4e-05	2e-06	0.000273	2e-07	0.0123	0	0.008068
61414-17C	CM-SS4	ARGUS VI (Obama)	2012-12-09	8.76667	0.3	249.371	0.059653	57.463	0.0192094	0.6679	0.0666408	0.276156	0.0469518	0.000713	0.0004406	1.05821	0.0009102	2.22424	0.0467919	0.01695	0.0028	0.0174	0.06	0.0177	0.022	0.0078272	0.00036	4.3283	0.0029	99.9234	0.0627543	74.1116	0.0486645	0.102791	5.7463e-18	NM-254E	0.009546	1.19e-05	1.83736	1.00022	0.000698	7.8e-06	4e-05	2e-06	0.000273	2e-07	0.0123	0	0.008068
61414-17D	CM-SS4	ARGUS VI (Obama)	2012-12-09	9.46667	0.5	81.6658	0.0550438	18.7337	0.0142804	0.1454	0.0675352	0.0446735	0.0469786	0.0006076	0.0004231	1.05821	0.0009102	2.21803	0.0467848	0.01695	0.0028	0.0174	0.06	0.0177	0.022	0.0078068	0.0003599	4.34169	0.0080604	99.7807	0.181794	74.3362	0.135242	0.162902	1.87337e-18	NM-254E	0.009546	1.19e-05	1.83842	1.00022	0.000698	7.8e-06	4e-05	2e-06	0.000273	2e-07	0.0123	0	0.008068
61414-17E	CM-SS4	ARGUS VI (Obama)	2012-12-09	9.7	3	109.387	0.0561219	25.5479	0.0142804	0.2888	0.068	0.123934	0.046988	0.0005282	0.0004406	1.05821	0.0009102	2.21591	0.0467832	0.01695	0.0028	0.0174	0.06	0.0177	0.022	0.0077998	0.0003599	4.26779	0.0060808	99.8647	0.140552	73.0959	0.102097	0.135657	2.55479e-18	NM-254E	0.009546	1.19e-05	1.83878	1.00022	0.000698	7.8e-06	4e-05	2e-06	0.000273	2e-07	0.0123	0	0.008068
61414-18A	CM-SS4	ARGUS VI (Obama)	2012-12-09	9.95	0.1	-0.125813	0.128797	0.13568	0.0580802	-0.1079	0.0976166	0.0034944	0.0855746	0.00078	0.0015246	1.05821	0.0009102	2.21381	0.0467819	0.01695	0.0028	0.0174	0.06	0.0177	0.022	0.0077929	0.0003599	-2.65898	3.66125	284.273	470.887	-47.0627	65.6425	65.6426	1.3568e-20	NM-254E	0.009546	1.19e-05	1.83914	1.00022	0.000698	7.8e-06	4e-05	2e-06	0.000273	2e-07	0.0123	0	0.008068
61414-18B	CM-SS4	ARGUS VI (Obama)	2012-12-09	10.1	0.15	15.4465	0.138161	3.39539	0.084065	0.1486	0.152315	0.0136113	0.100477	-0.0015224	0.0016276	1.05821	0.0009102	2.21252	0.0467814	0.01695	0.0028	0.0174	0.06	0.0177	0.022	0.0077887	0.0003599	4.67563	0.18846	102.96	3.39886	79.9307	3.15242	3.15393	3.39539e-19	NM-254E	0.009546	1.19e-05	1.83937	1.00022	0.000698	7.8e-06	4e-05	2e-06	0.000273	2e-07	0.0123	0	0.008068
61414-18C	CM-SS4	ARGUS VI (Obama)	2012-12-09	10.25	0.3	744.198	0.0800841	168.968	0.0251618	2.0339	0.068	0.576161	0.0479707	0.0010821	0.0004531	1.05821	0.0009102	2.21123	0.0467809	0.01695	0.0028	0.0174	0.06	0.0177	0.022	0.0077844	0.0003599	4.39468	0.0011394	99.9628	0.023829	75.2252	0.0191087	0.0938408	1.68968e-17	NM-254E	0.009546	1.19e-05	1.83959	1.00022	0.000698	7.8e-06	4e-05	2e-06	0.000273	2e-07	0.0123	0	0.008068
61414-18D	CM-SS4	ARGUS VI (Obama)	2012-12-09	10.4833	0.5	179.621	0.0590289	40.7073	0.0162467	0.2569	0.0689638	0.131373	0.0479802	-0.0003266	0.0004287	1.05821	0.0009102	2.20917	0.0467805	0.01695	0.0028	0.0174	0.06	0.0177	0.022	0.0077776	0.0003599	4.40699	0.0038822	100.058	0.0851797	75.4316	0.0650981	0.112801	4.07074e-18	NM-254E	0.009546	1.19e-05	1.83996	1.00022	0.000698	7.8e-06	4e-05	2e-06	0.000273	2e-07	0.0123	0	0.008068
61414-18E	CM-SS4	ARGUS VI (Obama)	2012-12-09	10.95	3	540.886	0.0737389	123.095	0.0211905	1.3768	0.0694622	0.49146	0.0461272	0.0011067	0.0004531	1.05821	0.0009102	2.20511	0.0467806	0.01695	0.0028	0.0174	0.06	0.0177	0.022	0.0077642	0.0003599	4.38363	0.0014626	99.9459	0.0316801	75.0398	0.0245313	0.0948789	1.23095e-17	NM-254E	0.009546	1.19e-05	1.84067	1.00022	0.000698	7.8e-06	4e-05	2e-06	0.000273	2e-07	0.0123	0	0.008068
61414-19A	CM-SS4	ARGUS VI (Obama)	2012-12-09	11.55	0.1	267.675	0.0635419	66.9745	0.0192094	0.4771	0.064622	0.216939	0.0480227	0.0013773	0.0004345	1.05821	0.0009102	2.20004	0.0467822	0.01695	0.0028	0.0174	0.06	0.0177	0.022	0.0077474	0.0003599	3.98267	0.0024408	99.8509	0.0590586	68.3025	0.0410878	0.0931303	6.69745e-18	NM-254E	0.009546	1.19e-05	1.84159	1.00022	0.000698	7.8e-06	4e-05	2e-06	0.000273	2e-07	0.0123	0	0.008068
61414-19B	CM-SS4	ARGUS VI (Obama)	2012-12-10	14.2167	0.15	578.597	0.0736958	145.506	0.0261563	1.7573	0.068	0.486986	0.0481035	0.0001501	0.0004463	1.05821	0.0009102	2.05694	0.0467127	0.01695	0.0028	0.0174	0.06	0.0177	0.022	0.0072281	0.0003594	3.96836	0.0012682	99.999	0.0293708	68.0617	0.0213522	0.0859808	1.45506e-17	NM-254E	0.009546	1.19e-05	1.88244	1.00023	0.000698	7.8e-06	4e-05	2e-06	0.000273	2e-07	0.0123	0	0.008068
61414-19C	CM-SS4	ARGUS VI (Obama)	2012-12-10	14.4667	0.3	114.228	0.0615044	28.567	0.0182206	0.2432	0.0694622	0.14234	0.0490977	0.0003805	0.0004527	1.05821	0.0009102	2.05638	0.0467203	0.01695	0.0028	0.0174	0.06	0.0177	0.022	0.0072254	0.0003594	3.98693	0.0057842	99.9092	0.140852	68.3743	0.0973662	0.128373	2.8567e-18	NM-254E	0.009546	1.19e-05	1.88281	1.00023	0.000698	7.8e-06	4e-05	2e-06	0.000273	2e-07	0.0123	0	0.008068
61414-19D	CM-SS4	ARGUS VI (Obama)	2012-12-10	14.7	3	88.7982	0.0875189	22.0493	0.0311333	0.2411	0.0834506	0.108471	0.0599371	0.0012615	0.0005554	1.05821	0.0009102	2.05584	0.0467285	0.01695	0.0028	0.0174	0.06	0.0177	0.022	0.0072228	0.0003595	4.00254	0.0102094	99.5852	0.233116	68.6369	0.171833	0.191256	2.20492e-18	NM-254E	0.009546	1.19e-05	1.88318	1.00023	0.000698	7.8e-06	4e-05	2e-06	0.000273	2e-07	0.0123	0	0.008068
61414-20A	CM-SS4	ARGUS VI (Obama)	2012-12-09	11.8	0.1	230.942	0.195675	2.43738	0.0540844	0.178	0.0992018	0.145882	0.0857051	0.0015653	0.0012184	1.05821	0.0009102	2.19804	0.0467833	0.01695	0.0028	0.0174	0.06	0.0177	0.022	0.0077408	0.0003599	94.5603	2.10534	99.8041	0.19765	1177.48	19.3352	19.3654	2.43738e-19	NM-254E	0.009546	1.19e-05	1.84195	1.00022	0.000698	7.8e-06	4e-05	2e-06	0.000273	2e-07	0.0123	0	0.008068
61414-20B	CM-SS4	ARGUS VI (Obama)	2012-12-10	15	3	6364.6	0.323396	58.4611	0.0221825	0.5462	0.0848528	0.136376	0.0641547	-0.0005276	0.0004593	1.05821	0.0009102	2.05516	0.0467402	0.01695	0.0028	0.0174	0.06	0.0177	0.022	0.0072196	0.0003596	108.864	0.0417454	100.003	0.0075024	1304.35	0.357714	1.21666	5.84611e-18	NM-254E	0.009546	1.19e-05	1.88365	1.00023	0.000698	7.8e-06	4e-05	2e-06	0.000273	2e-07	0.0123	0	0.008068
61414-21A	CM-SS4	ARGUS VI (Obama)	2012-12-09	11.95	0.1	15.4356	0.0535234	5.05376	0.0113533	0.0743	0.068	0.0370278	0.0480382	0.0010872	0.0004287	1.05821	0.0009102	2.19678	0.0467841	0.01695	0.0028	0.0174	0.06	0.0177	0.022	0.0077366	0.0003599	2.98276	0.0282325	97.9163	0.962376	51.3922	0.479675	0.483817	5.05376e-19	NM-254E	0.009546	1.19e-05	1.84218	1.00022	0.000698	7.8e-06	4e-05	2e-06	0.000273	2e-07	0.0123	0	0.008068
61414-21B	CM-SS4	ARGUS VI (Obama)	2012-12-10	11.9333	0.15	32.2163	0.0571616	7.16287	0.0133011	0.0457	0.068	0.0541121	0.0500294	0.0008006	0.000428	1.05821	0.0009102	2.06296	0.0466739	0.01695	0.0028	0.0174	0.06	0.0177	0.022	0.0072554	0.0003591	4.45685	0.0212102	99.2697	0.469258	76.2675	0.355501	0.367495	7.16287e-19	NM-254E	0.009546	1.19e-05	1.87889	1.00023	0.000698	7.8e-06	4e-05	2e-06	0.000273	2e-07	0.0123	0	0.008068
61414-21C	CM-SS4	ARGUS VI (Obama)	2012-12-10	12.1667	0.3	764.698	0.0824779	174.048	0.0261563	2.0492	0.0710211	0.916519	0.0470943	-5.65e-05	0.0004399	1.05821	0.0009102	2.06227	0.0466755	0.01695	0.0028	0.0174	0.06	0.0177	0.022	0.0072524	0.0003591	4.38608	0.0011104	100.012	0.0230985	75.0809	0.018624	0.0935741	1.74048e-17	NM-254E	0.009546	1.19e-05	1.87927	1.00023	0.000698	7.8e-06	4e-05	2e-06	0.000273	2e-07	0.0123	0	0.008068
61414-21D	CM-SS4	ARGUS VI (Obama)	2012-12-10	12.9833	0.5	113.277	0.0577536	25.7966	0.0142805	0.1667	0.0694622	0.135774	0.0500731	0.0004599	0.0004339	1.05821	0.0009102	2.06003	0.0466849	0.01695	0.0028	0.0174	0.06	0.0177	0.022	0.0072424	0.0003591	4.37813	0.0060056	99.8864	0.135311	74.9476	0.100731	0.136113	2.57966e-18	NM-254E	0.009546	1.19e-05	1.88053	1.00023	0.000698	7.8e-06	4e-05	2e-06	0.000273	2e-07	0.0123	0	0.008068
61414-21E	CM-SS4	ARGUS VI (Obama)	2012-12-10	13.2	3	505.17	0.0909056	114.571	0.0411048	1.3444	0.0781025	0.520625	0.0534644	0.0008055	0.0005472	1.05821	0.0009102	2.05946	0.0466886	0.01695	0.0028	0.0174	0.06	0.0177	0.022	0.0072398	0.0003592	4.39945	0.002272	99.9606	0.0412431	75.3051	0.0381008	0.09955	1.14571e-17	NM-254E	0.009546	1.19e-05	1.88087	1.00023	0.000698	7.8e-06	4e-05	2e-06	0.000273	2e-07	0.0123	0	0.008068
61414-22A	CM-SS4	ARGUS VI (Obama)	2012-12-09	12.1833	0.1	11.3862	0.119536	2.40278	0.0530855	0.2431	0.101607	-0.080519	0.0857326	0.0011026	0.0010479	1.05821	0.0009102	2.19481	0.0467855	0.01695	0.0028	0.0174	0.06	0.0177	0.022	0.0077301	0.0003599	4.5925	0.172356	97.0811	3.11447	78.5397	2.88524	2.88683	2.40278e-19	NM-254E	0.009546	1.19e-05	1.84254	1.00022	0.000698	7.8e-06	4e-05	2e-06	0.000273	2e-07	0.0123	0	0.008068
61414-22B	CM-SS4	ARGUS VI (Obama)	2012-12-10	15.1333	3	641.631	0.0760602	143.806	0.0341228	1.6471	0.0855628	0.833979	0.0670819	0.0006601	0.0004285	1.05821	0.0009102	2.05488	0.0467456	0.01695	0.0028	0.0174	0.06	0.0177	0.022	0.0072182	0.0003596	4.45281	0.0014815	99.9796	0.0261698	76.1998	0.024832	0.0962971	1.43806e-17	NM-254E	0.009546	1.19e-05	1.88385	1.00023	0.000698	7.8e-06	4e-05	2e-06	0.000273	2e-07	0.0123	0	0.008068
61414-23A	CM-SS4	ARGUS VI (Obama)	2012-12-09	12.3333	0.1	235.028	0.1667	53.9519	0.200063	1.1095	0.116619	0.222791	0.0939632	0.0014223	0.0012184	1.05821	0.0009102	2.19357	0.0467865	0.01695	0.0028	0.0174	0.06	0.0177	0.022	0.0077259	0.0003599	4.34081	0.017747	99.83	0.184539	74.3216	0.29777	0.311304	5.39519e-18	NM-254E	0.009546	1.19e-05	1.84277	1.00022	0.000698	7.8e-06	4e-05	2e-06	0.000273	2e-07	0.0123	0	0.008068
61414-23B	CM-SS4	ARGUS VI (Obama)	2012-12-10	15.25	3	223.755	0.0635191	51.3319	0.0221825	0.7106	0.0807217	0.169187	0.0656178	7e-05	0.0004343	1.05821	0.0009102	2.05461	0.0467512	0.01695	0.0028	0.0174	0.06	0.0177	0.022	0.0072168	0.0003597	4.3508	0.0033844	99.9974	0.0706187	74.4892	0.0567803	0.107256	5.13319e-18	NM-254E	0.009546	1.19e-05	1.88405	1.00023	0.000698	7.8e-06	4e-05	2e-06	0.000273	2e-07	0.0123	0	0.008068
61414-24A	CM-SS4	ARGUS VI (Obama)	2012-12-09	12.7333	0.1	143.196	0.157128	31.894	0.11006	0.2465	0.116619	0.316689	0.0873994	0.0014335	0.0013199	1.05821	0.0009102	2.1904	0.0467894	0.01695	0.0028	0.0174	0.06	0.0177	0.022	0.0077154	0.00036	4.46903	0.020375	99.7176	0.315998	76.4717	0.341463	0.353998	3.1894e-18	NM-254E	0.009546	1.19e-05	1.84336	1.00022	0.000698	7.8e-06	4e-05	2e-06	0.000273	2e-07	0.0123	0	0.008068
61414-24B	CM-SS4	ARGUS VI (Obama)	2012-12-10	15.3833	3	405.9	0.0883811	91.0273	0.0241683	0.9704	0.0906863	0.643657	0.064175	0.0012111	0.0004941	1.05821	0.0009102	2.05434	0.0467569	0.01695	0.0028	0.0174	0.06	0.0177	0.022	0.0072155	0.0003597	4.44764	0.0022287	99.9232	0.0477281	76.1131	0.037358	0.100164	9.10273e-18	NM-254E	0.009546	1.19e-05	1.88424	1.00023	0.000698	7.8e-06	4e-05	2e-06	0.000273	2e-07	0.0123	0	0.008068
61414-25A	CM-SS4	ARGUS VI (Obama)	2012-12-09	12.8833	0.1	338.126	0.205401	76.9239	0.16006	0.6417	0.1	0.328712	0.0906927	0.0007606	0.0013199	1.05821	0.0009102	2.18918	0.0467906	0.01695	0.0028	0.0174	0.06	0.0177	0.022	0.0077113	0.00036	4.38487	0.0108097	99.9394	0.144897	75.0607	0.181299	0.20316	7.69239e-18	NM-254E	0.009546	1.19e-05	1.84359	1.00022	0.000698	7.8e-06	4e-05	2e-06	0.000273	2e-07	0.0123	0	0.008068
61414-25B	CM-SS4	ARGUS VI (Obama)	2012-12-10	15.5167	3	108.348	0.0602558	24.8059	0.0211907	0.2467	0.0944934	0.154147	0.0641815	0.000767	0.0004466	1.05821	0.0009102	2.05408	0.0467628	0.01695	0.0028	0.0174	0.06	0.0177	0.022	0.0072142	0.0003597	4.35104	0.0069722	99.7994	0.146188	74.4931	0.116972	0.1482	2.48059e-18	NM-254E	0.009546	1.19e-05	1.88444	1.00023	0.000698	7.8e-06	4e-05	2e-06	0.000273	2e-07	0.0123	0	0.008068
61414-26A	CM-SS4	ARGUS VI (Obama)	2012-12-09	13.0333	0.1	12.92	0.119539	1.79905	0.0620768	0.2969	0.104862	0.15064	0.0746691	-0.0032193	0.0009005	1.05821	0.0009102	2.18795	0.0467919	0.01695	0.0028	0.0174	0.06	0.0177	0.022	0.0077072	0.00036	7.71646	0.312627	107.562	2.48528	130.102	5.08803	5.09043	1.79904e-19	NM-254E	0.009546	1.19e-05	1.84382	1.00022	0.000698	7.8e-06	4e-05	2e-06	0.000273	2e-07	0.0123	0	0.008068
61414-26B	CM-SS4	ARGUS VI (Obama)	2012-12-10	15.6333	3	382.306	0.069938	63.2138	0.0192096	0.828	0.0841487	0.0770812	0.0641881	0.0015017	0.0004345	1.05821	0.0009102	2.05382	0.0467689	0.01695	0.0028	0.0174	0.06	0.0177	0.022	0.0072129	0.0003598	6.0328	0.0029667	99.8846	0.0427175	102.493	0.0490176	0.133575	6.32138e-18	NM-254E	0.009546	1.19e-05	1.88463	1.00023	0.000698	7.8e-06	4e-05	2e-06	0.000273	2e-07	0.0123	0	0.008068
61414-27A	CM-SS4	ARGUS VI (Obama)	2012-12-09	13.4	0.1	442.922	0.24452	98.5997	0.16006	1.1834	0.116619	0.456855	0.100752	0.0027226	0.0012185	1.05821	0.0009102	2.18496	0.0467953	0.01695	0.0028	0.0174	0.06	0.0177	0.022	0.0076972	0.00036	4.47621	0.0085276	99.8248	0.113401	76.592	0.142904	0.170779	9.85997e-18	NM-254E	0.009546	1.19e-05	1.84439	1.00022	0.000698	7.8e-06	4e-05	2e-06	0.000273	2e-07	0.0123	0	0.008068
61414-27B	CM-SS4	ARGUS VI (Obama)	2012-12-10	15.9	3	157.661	0.0699473	35.2514	0.0182206	0.416	0.0921954	0.276535	0.0613724	0.0020337	0.0005015	1.05821	0.0009102	2.05328	0.0467828	0.01695	0.0028	0.0174	0.06	0.0177	0.022	0.0072102	0.0003599	4.44787	0.0052199	99.629	0.113891	76.117	0.0874965	0.127647	3.52514e-18	NM-254E	0.009546	1.19e-05	1.88504	1.00023	0.000698	7.8e-06	4e-05	2e-06	0.000273	2e-07	0.0123	0	0.008068
61414-31A	CM-SS4	ARGUS VI (Obama)	2012-12-09	14.4667	0.1	427.22	0.244522	97.4775	0.310081	1.2076	0.134164	0.336709	0.109351	0.0024027	0.0012185	1.05821	0.0009102	2.17668	0.0468059	0.01695	0.0028	0.0174	0.06	0.0177	0.022	0.0076694	0.0003601	4.36764	0.014627	99.8385	0.117584	74.7716	0.245361	0.261808	9.74775e-18	NM-254E	0.009546	1.19e-05	1.84599	1.00022	0.000698	7.8e-06	4e-05	2e-06	0.000273	2e-07	0.0123	0	0.008068
61414-31B	CM-SS4	ARGUS VI (Obama)	2012-12-10	16.6	3	377.623	0.0817413	86.7932	0.0221825	0.9512	0.0899389	0.306309	0.0656907	0.0009046	0.0004665	1.05821	0.0009102	2.05193	0.0468257	0.01695	0.0028	0.0174	0.06	0.0177	0.022	0.0072031	0.0003602	4.33994	0.0021671	99.9346	0.0480344	74.307	0.0363615	0.0977875	8.67932e-18	NM-254E	0.009546	1.19e-05	1.88614	1.00023	0.000698	7.8e-06	4e-05	2e-06	0.000273	2e-07	0.0123	0	0.008068
61414-32A	CM-SS4	ARGUS VI (Obama)	2012-12-09	14.6167	0.1	508.021	0.26418	42.7144	0.17006	0.6185	0.116619	0.187761	0.0842817	-0.0001117	0.0012185	1.05821	0.0009102	2.17552	0.0468075	0.01695	0.0028	0.0174	0.06	0.0177	0.022	0.0076655	0.0003601	11.8865	0.0485106	100.01	0.102638	196.742	0.761287	0.79601	4.27144e-18	NM-254E	0.009546	1.19e-05	1.84622	1.00022	0.000698	7.8e-06	4e-05	2e-06	0.000273	2e-07	0.0123	0	0.008068
61414-32B	CM-SS4	ARGUS VI (Obama)	2012-12-10	16.95	3	1385.45	0.138184	118.224	0.0341229	1.4442	0.0984073	0.266585	0.067182	0.0007546	0.0004874	1.05821	0.0009102	2.05132	0.046849	0.01695	0.0028	0.0174	0.06	0.0177	0.022	0.0071999	0.0003604	11.7091	0.0037843	99.9853	0.0176099	193.955	0.0594778	0.237	1.18224e-17	NM-254E	0.009546	1.19e-05	1.88666	1.00023	0.000698	7.8e-06	4e-05	2e-06	0.000273	2e-07	0.0123	0	0.008068
61414-33A	CM-SS4	ARGUS VI (Obama)	2012-12-09	14.7667	0.1	511.992	0.283886	104.736	0.180061	0.961	0.116619	0.493742	0.0859147	-0.0001594	0.0008716	1.05821	0.0009102	2.17436	0.0468091	0.01695	0.0028	0.0174	0.06	0.0177	0.022	0.0076616	0.0003601	4.88113	0.0091741	100.016	0.0935847	83.3651	0.15317	0.183799	1.04736e-17	NM-254E	0.009546	1.19e-05	1.84645	1.00022	0.000698	7.8e-06	4e-05	2e-06	0.000273	2e-07	0.0123	0	0.008068
61414-33B	CM-SS4	ARGUS VI (Obama)	2012-12-10	17.0667	3	820.804	0.102356	169.198	0.0291415	2.0407	0.092957	0.843614	0.0600542	0.0006628	0.0004804	1.05821	0.0009102	2.0511	0.0468584	0.01695	0.0028	0.0174	0.06	0.0177	0.022	0.0071987	0.0003605	4.84232	0.0013362	99.9842	0.0249309	82.7168	0.0223169	0.10326	1.69198e-17	NM-254E	0.009546	1.19e-05	1.88686	1.00023	0.000698	7.8e-06	4e-05	2e-06	0.000273	2e-07	0.0123	0	0.008068
61414-34A	CM-SS4	ARGUS VI (Obama)	2012-12-09	15.3833	0.1	39.3693	0.14762	9.3387	0.0730698	0.3517	0.112361	0.066321	0.104308	-0.000909	0.0011178	1.05821	0.0009102	2.16974	0.0468157	0.01695	0.0028	0.0174	0.06	0.0177	0.022	0.007646	0.0003602	4.23764	0.0512533	100.713	1.00174	72.5897	0.860775	0.865335	9.3387e-19	NM-254E	0.009546	1.19e-05	1.84738	1.00022	0.000698	7.8e-06	4e-05	2e-06	0.000273	2e-07	0.0123	0	0.008068
61414-34B	CM-SS4	ARGUS VI (Obama)	2012-12-10	17.2	3	2166.76	0.147637	495.388	0.053086	6.0153	0.0944934	2.11105	0.0587115	0.001973	0.0004601	1.05821	0.0009102	2.05088	0.0468683	0.01695	0.0028	0.0174	0.06	0.0177	0.022	0.0071975	0.0003606	4.36498	0.0006243	99.9807	0.0117591	74.727	0.010473	0.0918773	4.95388e-17	NM-254E	0.009546	1.19e-05	1.88706	1.00023	0.000698	7.8e-06	4e-05	2e-06	0.000273	2e-07	0.0123	0	0.008068
61414-35A	CM-SS4	ARGUS VI (Obama)	2012-12-09	15.5333	0.1	242.511	0.205407	54.3	0.11006	0.2391	0.104043	0.214508	0.0975567	0.0018771	0.0011179	1.05821	0.0009102	2.1686	0.0468173	0.01695	0.0028	0.0174	0.06	0.0177	0.022	0.0076422	0.0003602	4.44798	0.0115567	99.7733	0.18254	76.1188	0.193716	0.214859	5.43e-18	NM-254E	0.009546	1.19e-05	1.84761	1.00022	0.000698	7.8e-06	4e-05	2e-06	0.000273	2e-07	0.0123	0	0.008068
61414-35B	CM-SS4	ARGUS VI (Obama)	2012-12-10	17.3333	3	179.857	0.0663821	40.1519	0.0182206	0.3969	0.0914385	0.17325	0.0614446	0.0005447	0.0004473	1.05821	0.0009102	2.05067	0.0468784	0.01695	0.0028	0.0174	0.06	0.0177	0.022	0.0071963	0.0003606	4.46764	0.0042313	99.9166	0.0908738	76.4483	0.0709128	0.11722	4.01519e-18	NM-254E	0.009546	1.19e-05	1.88726	1.00023	0.000698	7.8e-06	4e-05	2e-06	0.000273	2e-07	0.0123	0	0.008068
61414-36A	CM-SS4	ARGUS VI (Obama)	2012-12-09	15.6833	0.1	193.459	0.195684	42.9105	0.130059	0.4146	0.1253	0.107729	0.0876119	8.22e-05	0.0011178	1.05821	0.0009102	2.16747	0.046819	0.01695	0.0028	0.0174	0.06	0.0177	0.022	0.0076383	0.0003602	4.49998	0.0163649	99.9909	0.224299	76.9901	0.274181	0.289842	4.29105e-18	NM-254E	0.009546	1.19e-05	1.84784	1.00022	0.000698	7.8e-06	4e-05	2e-06	0.000273	2e-07	0.0123	0	0.008068
61414-36B	CM-SS4	ARGUS VI (Obama)	2012-12-10	17.45	3	2263.24	0.166729	506.543	0.0550838	6.1319	0.093723	2.82797	0.0642843	0.0016105	0.0004412	1.05821	0.0009102	2.05046	0.0468886	0.01695	0.0028	0.0174	0.06	0.0177	0.022	0.0071951	0.0003607	4.45947	0.0006454	99.9889	0.0121451	76.3114	0.0108168	0.0937996	5.06543e-17	NM-254E	0.009546	1.19e-05	1.88745	1.00023	0.000698	7.8e-06	4e-05	2e-06	0.000273	2e-07	0.0123	0	0.008068
61414-37A	CM-SS4	ARGUS VI (Obama)	2012-12-09	15.8333	0.1	50.6277	0.147622	12.7256	0.100061	0.0625	0.109	0.155423	0.08599	-0.0037498	0.0010381	1.05821	0.0009102	2.16635	0.0468206	0.01695	0.0028	0.0174	0.06	0.0177	0.022	0.0076345	0.0003602	4.05905	0.0418167	102.234	0.741392	69.5878	0.703445	0.708576	1.27257e-18	NM-254E	0.009546	1.19e-05	1.84807	1.00022	0.000698	7.8e-06	4e-05	2e-06	0.000273	2e-07	0.0123	0	0.008068
61414-37B	CM-SS4	ARGUS VI (Obama)	2012-12-10	17.5833	3	520.537	0.0970803	119.81	0.0301372	1.3307	0.0992018	0.389046	0.0672176	0.0005588	0.0004538	1.05821	0.0009102	2.05024	0.0468997	0.01695	0.0028	0.0174	0.06	0.0177	0.022	0.0071939	0.0003608	4.33547	0.0017696	99.9736	0.0371699	74.2319	0.0296927	0.0954233	1.1981e-17	NM-254E	0.009546	1.19e-05	1.88766	1.00023	0.000698	7.8e-06	4e-05	2e-06	0.000273	2e-07	0.0123	0	0.008068
61414-38A	CM-SS4	ARGUS VI (Obama)	2012-12-09	15.9833	0.1	406.17	0.215157	91.7472	0.190062	1.2746	0.1253	0.563547	0.0843766	-0.0004347	0.0012185	1.05821	0.0009102	2.16524	0.0468222	0.01695	0.0028	0.0174	0.06	0.0177	0.022	0.0076308	0.0003602	4.42094	0.0102647	100.044	0.116897	75.6655	0.172102	0.195339	9.17472e-18	NM-254E	0.009546	1.19e-05	1.8483	1.00022	0.000698	7.8e-06	4e-05	2e-06	0.000273	2e-07	0.0123	0	0.008068
61414-38B	CM-SS4	ARGUS VI (Obama)	2012-12-10	18.3	3	192.109	0.0693308	43.0723	0.017233	0.4306	0.0921954	0.203042	0.0601149	0.0051169	0.0004674	1.05821	0.0009102	2.04915	0.0469655	0.01695	0.0028	0.0174	0.06	0.0177	0.022	0.0071876	0.0003613	4.41704	0.0040252	99.2126	0.0887766	75.6001	0.0674909	0.114362	4.30723e-18	NM-254E	0.009546	1.19e-05	1.88876	1.00023	0.000698	7.8e-06	4e-05	2e-06	0.000273	2e-07	0.0123	0	0.008068
61414-39A	CM-SS4	ARGUS VI (Obama)	2012-12-09	16.5833	0.1	146.636	0.185992	35.1148	0.200064	0.5796	0.134164	0.117241	0.0811976	-0.0002177	0.00132	1.05821	0.0009102	2.16081	0.0468284	0.01695	0.0028	0.0174	0.06	0.0177	0.022	0.0076157	0.0003603	4.17004	0.0268383	100.052	0.323399	71.4539	0.451016	0.459398	3.51148e-18	NM-254E	0.009546	1.19e-05	1.84922	1.00022	0.000698	7.8e-06	4e-05	2e-06	0.000273	2e-07	0.0123	0	0.008068
61414-39B	CM-SS4	ARGUS VI (Obama)	2012-12-10	18.4167	3	663.033	0.0810123	162.944	0.0381117	2.0058	0.0899389	0.534765	0.067264	0.000845	0.0004674	1.05821	0.0009102	2.04897	0.0469786	0.01695	0.0028	0.0174	0.06	0.0177	0.022	0.0071865	0.0003614	4.05974	0.0013745	99.9685	0.0273694	69.5995	0.023121	0.0882175	1.62944e-17	NM-254E	0.009546	1.19e-05	1.88896	1.00023	0.000698	7.8e-06	4e-05	2e-06	0.000273	2e-07	0.0123	0	0.008068
61414-40A	CM-SS4	ARGUS VI (Obama)	2012-12-09	16.7333	0.1	75.1931	0.058464	19.4614	0.0142804	0.1806	0.0694622	0.0909931	0.0472607	0.0005757	0.0004408	1.05821	0.0009102	2.15972	0.0468298	0.01695	0.0028	0.0174	0.06	0.0177	0.022	0.007612	0.0003603	3.84716	0.0079149	99.78	0.206887	66.0199	0.133406	0.155984	1.94614e-18	NM-254E	0.009546	1.19e-05	1.84945	1.00022	0.000698	7.8e-06	4e-05	2e-06	0.000273	2e-07	0.0123	0	0.008068
61414-40B	CM-SS4	ARGUS VI (Obama)	2012-12-10	10.1667	0.15	470.367	0.108548	113.37	0.033126	1.2315	0.0768375	0.286868	0.0533311	0.0002259	0.0004936	1.05821	0.0009102	2.06837	0.0466759	0.01695	0.0028	0.0174	0.06	0.0177	0.022	0.0072786	0.0003591	4.14049	0.0020189	99.9901	0.0453575	70.9573	0.0339374	0.0931638	1.1337e-17	NM-254E	0.009546	1.19e-05	1.87618	1.00023	0.000698	7.8e-06	4e-05	2e-06	0.000273	2e-07	0.0123	0	0.008068
61414-40C	CM-SS4	ARGUS VI (Obama)	2012-12-10	10.5167	0.3	376.259	0.0683992	90.3475	0.023175	0.9212	0.0689638	0.156329	0.049971	0.0015947	0.0005009	1.05821	0.0009102	2.06728	0.0466739	0.01695	0.0028	0.0174	0.06	0.0177	0.022	0.007274	0.0003591	4.15136	0.0021092	99.876	0.0474289	71.1401	0.0354507	0.0939285	9.03475e-18	NM-254E	0.009546	1.19e-05	1.8767	1.00023	0.000698	7.8e-06	4e-05	2e-06	0.000273	2e-07	0.0123	0	0.008068
61414-41A	CM-SS4	ARGUS VI (Obama)	2012-12-09	16.9833	0.1	458.67	0.264184	102.107	0.310081	1.3666	0.1253	0.65724	0.0959946	-0.0003335	0.0010879	1.05821	0.0009102	2.15801	0.0468321	0.01695	0.0028	0.0174	0.06	0.0177	0.022	0.0076062	0.0003603	4.48554	0.0142488	100.034	0.108089	76.7482	0.238758	0.256485	1.02107e-17	NM-254E	0.009546	1.19e-05	1.84982	1.00022	0.000698	7.8e-06	4e-05	2e-06	0.000273	2e-07	0.0123	0	0.008068
61414-41B	CM-SS4	ARGUS VI (Obama)	2012-12-10	18.65	3	416.682	0.0971301	93.7808	0.027151	1.1094	0.0877268	0.520507	0.0601326	0.0009466	0.0004359	1.05821	0.0009102	2.04865	0.0470028	0.01695	0.0028	0.0174	0.06	0.0177	0.022	0.0071845	0.0003616	4.43253	0.002157	99.9422	0.0455175	75.8599	0.0361603	0.0994414	9.37808e-18	NM-254E	0.009546	1.19e-05	1.88932	1.00023	0.000698	7.8e-06	4e-05	2e-06	0.000273	2e-07	0.0123	0	0.008068
61414-42A	CM-SS4	ARGUS VI (Obama)	2012-12-09	17.35	0.1	177.891	0.147626	40.8691	0.210065	0.4476	0.134164	0.109728	0.101079	0.0008295	0.0010779	1.05821	0.0009102	2.15536	0.0468355	0.01695	0.0028	0.0174	0.06	0.0177	0.022	0.0075971	0.0003603	4.33878	0.0239607	99.8653	0.215785	74.2875	0.402035	0.412151	4.08691e-18	NM-254E	0.009546	1.19e-05	1.85038	1.00022	0.000698	7.8e-06	4e-05	2e-06	0.000273	2e-07	0.0123	0	0.008068
61414-42B	CM-SS4	ARGUS VI (Obama)	2012-12-10	18.7833	3	274.79	0.0686334	62.6797	0.027151	0.7233	0.093723	0.25036	0.0643545	0.0020239	0.000461	1.05821	0.0009102	2.04848	0.0470165	0.01695	0.0028	0.0174	0.06	0.0177	0.022	0.0071835	0.0003617	4.36667	0.0030995	99.7873	0.061377	74.7553	0.0519938	0.105078	6.26797e-18	NM-254E	0.009546	1.19e-05	1.88951	1.00023	0.000698	7.8e-06	4e-05	2e-06	0.000273	2e-07	0.0123	0	0.008068
61414-43A	CM-SS4	ARGUS VI (Obama)	2012-12-09	17.7333	0.1	3.95336	0.119557	1.03238	0.0640754	-0.1136	0.115763	0.0159184	0.0877605	3.41e-05	0.00132	1.05821	0.0009102	2.15264	0.0468388	0.01695	0.0028	0.0174	0.06	0.0177	0.022	0.0075878	0.0003603	3.81084	0.463506	99.725	10.8525	65.4077	7.81496	7.81538	1.03238e-19	NM-254E	0.009546	1.19e-05	1.85098	1.00022	0.000698	7.8e-06	4e-05	2e-06	0.000273	2e-07	0.0123	0	0.008068
61414-43B	CM-SS4	ARGUS VI (Obama)	2012-12-10	19.1167	3	54.9506	0.0574733	12.1633	0.0201997	0.2319	0.088459	0.0404467	0.0658264	0.001358	0.0004746	1.05821	0.0009102	2.04804	0.047055	0.01695	0.0028	0.0174	0.06	0.0177	0.022	0.0071807	0.000362	4.47678	0.0146033	99.2707	0.297313	76.6014	0.244718	0.261979	1.21633e-18	NM-254E	0.009546	1.19e-05	1.89003	1.00023	0.000698	7.8e-06	4e-05	2e-06	0.000273	2e-07	0.0123	0	0.008068
61414-44A	CM-SS4	ARGUS VI (Obama)	2012-12-09	17.8833	0.1	132.853	0.176335	30.7889	0.120059	0.3386	0.1253	0.065903	0.079688	-9.68446e-06	0.0011079	1.05821	0.0009102	2.15157	0.0468401	0.01695	0.0028	0.0174	0.06	0.0177	0.022	0.0075842	0.0003603	4.30717	0.020761	100.006	0.312072	73.757	0.348449	0.359913	3.07888e-18	NM-254E	0.009546	1.19e-05	1.85121	1.00022	0.000698	7.8e-06	4e-05	2e-06	0.000273	2e-07	0.0123	0	0.008068
61414-44B	CM-SS4	ARGUS VI (Obama)	2012-12-10	19.2333	3	419.54	0.0778433	95.8067	0.0241683	1.2088	0.0899389	0.337595	0.0673091	0.0011824	0.0004424	1.05821	0.0009102	2.04788	0.04707	0.01695	0.0028	0.0174	0.06	0.0177	0.022	0.0071797	0.0003621	4.36758	0.0019443	99.9225	0.0410872	74.7706	0.0326145	0.0969794	9.58067e-18	NM-254E	0.009546	1.19e-05	1.89023	1.00023	0.000698	7.8e-06	4e-05	2e-06	0.000273	2e-07	0.0123	0	0.008068
61414-45A	CM-SS4	ARGUS VI (Obama)	2012-12-09	18.05	0.1	1.75449	0.119558	0.313119	0.0570813	0.3297	0.1	0.0981265	0.096079	0.0002207	0.0009887	1.05821	0.0009102	2.1505	0.0468412	0.01695	0.0028	0.0174	0.06	0.0177	0.022	0.0075805	0.0003603	5.42829	1.41951	96.9953	19.3236	92.4776	23.5823	23.5826	3.13119e-20	NM-254E	0.009546	1.19e-05	1.85144	1.00022	0.000698	7.8e-06	4e-05	2e-06	0.000273	2e-07	0.0123	0	0.008068
61414-45B	CM-SS4	ARGUS VI (Obama)	2012-12-10	19.3667	3	108.749	0.0580781	24.6171	0.0201997	0.459	0.0899389	0.0943323	0.0643856	0.0016279	0.0004486	1.05821	0.0009102	2.04772	0.0470857	0.01695	0.0028	0.0174	0.06	0.0177	0.022	0.0071786	0.0003622	4.39029	0.0069386	99.5625	0.144563	75.1514	0.116367	0.148209	2.46171e-18	NM-254E	0.009546	1.19e-05	1.89043	1.00023	0.000698	7.8e-06	4e-05	2e-06	0.000273	2e-07	0.0123	0	0.008068
61414-46A	CM-SS4	ARGUS VI (Obama)	2012-12-09	18.2	0.1	53.2596	0.147629	6.73184	0.0670733	-0.047	0.114909	0.0268494	0.0977715	0.003342	0.0010879	1.05821	0.0009102	2.14944	0.0468424	0.01695	0.0028	0.0174	0.06	0.0177	0.022	0.0075768	0.0003604	7.75563	0.0937336	98.1284	0.722956	130.739	1.52499	1.53308	6.73184e-19	NM-254E	0.009546	1.19e-05	1.85168	1.00022	0.000698	7.8e-06	4e-05	2e-06	0.000273	2e-07	0.0123	0	0.008068
61414-46B	CM-SS4	ARGUS VI (Obama)	2012-12-10	19.4833	3	544.608	0.0827197	113.444	0.0311333	1.2676	0.0914385	0.360541	0.0673231	0.0008808	0.0004366	1.05821	0.0009102	2.04758	0.0471015	0.01695	0.0028	0.0174	0.06	0.0177	0.022	0.0071776	0.0003624	4.79055	0.0018944	99.9567	0.032256	81.852	0.0316544	0.104689	1.13444e-17	NM-254E	0.009546	1.19e-05	1.89062	1.00023	0.000698	7.8e-06	4e-05	2e-06	0.000273	2e-07	0.0123	0	0.008068
61414-47A	CM-SS4	ARGUS VI (Obama)	2012-12-09	18.35	0.1	334.876	0.205412	76.0499	0.260072	1.1692	0.104862	0.324085	0.0813156	0.002949	0.0012186	1.05821	0.0009102	2.14839	0.0468435	0.01695	0.0028	0.0174	0.06	0.0177	0.022	0.0075732	0.0003604	4.38415	0.0159919	99.7461	0.139089	75.0486	0.268217	0.283447	7.60499e-18	NM-254E	0.009546	1.19e-05	1.85191	1.00022	0.000698	7.8e-06	4e-05	2e-06	0.000273	2e-07	0.0123	0	0.008068
61414-47B	CM-SS4	ARGUS VI (Obama)	2012-12-10	19.8333	3	271.632	0.066572	62.2912	0.0301373	0.5908	0.0921954	0.31847	0.0734391	0.0004138	0.0004368	1.05821	0.0009102	2.04718	0.0471469	0.01695	0.0028	0.0174	0.06	0.0177	0.022	0.007175	0.0003627	4.35102	0.003158	99.963	0.0593362	74.4929	0.0529828	0.105299	6.22912e-18	NM-254E	0.009546	1.19e-05	1.89115	1.00023	0.000698	7.8e-06	4e-05	2e-06	0.000273	2e-07	0.0123	0	0.008068
61414-48A	CM-SS4	ARGUS VI (Obama)	2012-12-09	18.5	0.1	33.4836	0.138183	7.4758	0.0590795	-0.0638	0.113208	0.0463036	0.0861795	0.0028829	0.001058	1.05821	0.0009102	2.14735	0.0468445	0.01695	0.0028	0.0174	0.06	0.0177	0.022	0.0075696	0.0003604	4.35614	0.0575419	97.4335	1.10614	74.5788	0.965339	0.969629	7.4758e-19	NM-254E	0.009546	1.19e-05	1.85214	1.00022	0.000698	7.8e-06	4e-05	2e-06	0.000273	2e-07	0.0123	0	0.008068
61414-48B	CM-SS4	ARGUS VI (Obama)	2012-12-10	20.1667	3	598.897	0.0787164	136.958	0.0331261	1.6698	0.0960469	0.562395	0.0629959	0.0003446	0.0004687	1.05821	0.0009102	2.04682	0.047194	0.01695	0.0028	0.0174	0.06	0.0177	0.022	0.0071724	0.0003631	4.36437	0.0015796	99.9904	0.0299712	74.7168	0.0264976	0.095035	1.36958e-17	NM-254E	0.009546	1.19e-05	1.89167	1.00023	0.000698	7.8e-06	4e-05	2e-06	0.000273	2e-07	0.0123	0	0.008068
61414-51A	CM-SS4	ARGUS VI (Obama)	2012-12-09	19.6333	0.1	377.189	0.234723	84.4697	0.280076	0.9306	0.1253	0.521678	0.094529	0.0008745	0.0012186	1.05821	0.0009102	2.13982	0.0468503	0.01695	0.0028	0.0174	0.06	0.0177	0.022	0.0075436	0.0003604	4.45472	0.0156588	99.9416	0.130693	76.2319	0.262459	0.278475	8.44697e-18	NM-254E	0.009546	1.19e-05	1.85387	1.00022	0.000698	7.8e-06	4e-05	2e-06	0.000273	2e-07	0.0123	0	0.008068
61414-51B	CM-SS4	ARGUS VI (Obama)	2012-12-10	20.5333	3	1223.67	0.108796	277.027	0.0440991	3.3946	0.092957	1.15541	0.0616074	0.00143	0.0004496	1.05821	0.0009102	2.04645	0.0472501	0.01695	0.0028	0.0174	0.06	0.0177	0.022	0.0071696	0.0003635	4.4079	0.000942	99.9728	0.0168499	75.4468	0.0157961	0.0934839	2.77027e-17	NM-254E	0.009546	1.19e-05	1.89226	1.00023	0.000698	7.8e-06	4e-05	2e-06	0.000273	2e-07	0.0123	0	0.008068
61414-52A	CM-SS4	ARGUS VI (Obama)	2012-12-09	19.7833	0.1	223.873	0.176338	50.2852	0.140059	0.5646	0.1253	0.30333	0.0962167	-0.0019335	0.0010481	1.05821	0.0009102	2.13883	0.0468508	0.01695	0.0028	0.0174	0.06	0.0177	0.022	0.0075401	0.0003604	4.45595	0.0143359	100.269	0.178995	76.2525	0.240283	0.25769	5.02852e-18	NM-254E	0.009546	1.19e-05	1.8541	1.00022	0.000698	7.8e-06	4e-05	2e-06	0.000273	2e-07	0.0123	0	0.008068
61414-52B	CM-SS4	ARGUS VI (Obama)	2012-12-10	20.6667	3	107.311	0.0588169	24.1501	0.017233	0.3004	0.0891964	0.111655	0.0734895	-0.0004018	0.0004376	1.05821	0.0009102	2.04634	0.0472697	0.01695	0.0028	0.0174	0.06	0.0177	0.022	0.0071687	0.0003636	4.44078	0.0067265	100.12	0.144562	75.998	0.112759	0.146035	2.41501e-18	NM-254E	0.009546	1.19e-05	1.89245	1.00023	0.000698	7.8e-06	4e-05	2e-06	0.000273	2e-07	0.0123	0	0.008068
61414-53A	CM-SS4	ARGUS VI (Obama)	2012-12-09	20.1667	0.1	2577.48	0.671636	59.7103	0.150059	0.3791	0.0891964	0.485186	0.0830477	4.08e-05	0.0014221	1.05821	0.0009102	2.13633	0.0468518	0.01695	0.0028	0.0174	0.06	0.0177	0.022	0.0075315	0.0003604	43.1589	0.109298	100.001	0.0403624	631.528	1.35259	1.50759	5.97103e-18	NM-254E	0.009546	1.19e-05	1.85468	1.00022	0.000698	7.8e-06	4e-05	2e-06	0.000273	2e-07	0.0123	0	0.008068
61414-53B	CM-SS4	ARGUS VI (Obama)	2012-12-10	20.95	3	1762.76	0.128992	122.763	0.0321296	1.4718	0.093723	0.912754	0.0630365	0.0010257	0.0004762	1.05821	0.0009102	2.04609	0.0473161	0.01695	0.0028	0.0174	0.06	0.0177	0.022	0.0071667	0.000364	14.3492	0.0040703	99.9868	0.0131382	234.987	0.0625549	0.281938	1.22763e-17	NM-254E	0.009546	1.19e-05	1.89289	1.00023	0.000698	7.8e-06	4e-05	2e-06	0.000273	2e-07	0.0123	0	0.008068
61414-54A	CM-SS4	ARGUS VI (Obama)	2012-12-09	20.3167	0.1	23.3453	0.104135	5.35123	0.077068	0.2912	0.116619	-0.0502682	0.101327	0.000511	0.000969	1.05821	0.0009102	2.13536	0.0468521	0.01695	0.0028	0.0174	0.06	0.0177	0.022	0.0075281	0.0003604	4.32595	0.0847925	99.3442	1.39065	74.0722	1.4229	1.42577	5.35123e-19	NM-254E	0.009546	1.19e-05	1.85492	1.00022	0.000698	7.8e-06	4e-05	2e-06	0.000273	2e-07	0.0123	0	0.008068
61414-54B	CM-SS4	ARGUS VI (Obama)	2012-12-10	21.4	3	428.935	0.0764605	98.1991	0.0301373	1.2058	0.0960469	0.408259	0.0644936	0.000447	0.0004568	1.05821	0.0009102	2.04572	0.0473942	0.01695	0.0028	0.0174	0.06	0.0177	0.022	0.0071636	0.0003646	4.35893	0.0020814	99.9766	0.0406844	74.6256	0.0349181	0.0976161	9.81991e-18	NM-254E	0.009546	1.19e-05	1.8936	1.00023	0.000698	7.8e-06	4e-05	2e-06	0.000273	2e-07	0.0123	0	0.008068
61414-55A	CM-SS4	ARGUS VI (Obama)	2012-12-09	20.4833	0.1	207.864	0.195691	47.2455	0.130059	0.6425	0.116619	0.148041	0.10304	0.0010384	0.001078	1.05821	0.0009102	2.13439	0.0468523	0.01695	0.0028	0.0174	0.06	0.0177	0.022	0.0075247	0.0003604	4.38531	0.0144814	99.8571	0.20435	75.0681	0.242879	0.259609	4.72455e-18	NM-254E	0.009546	1.19e-05	1.85515	1.00022	0.000698	7.8e-06	4e-05	2e-06	0.000273	2e-07	0.0123	0	0.008068
61414-55B	CM-SS4	ARGUS VI (Obama)	2012-12-10	21.8333	3	120.176	0.0620786	27.3492	0.0182206	0.1846	0.0944934	0.0062511	0.06029	0.0005971	0.0004771	1.05821	0.0009102	2.04542	0.0474737	0.01695	0.0028	0.0174	0.06	0.0177	0.022	0.0071608	0.0003652	4.37949	0.0063846	99.85	0.139351	74.9704	0.107087	0.1409	2.73492e-18	NM-254E	0.009546	1.19e-05	1.89426	1.00023	0.000698	7.8e-06	4e-05	2e-06	0.000273	2e-07	0.0123	0	0.008068
61414-56A	CM-SS4	ARGUS VI (Obama)	2012-12-09	20.6333	0.1	222.027	0.195691	50.0385	0.0930628	0.5807	0.106508	0.249363	0.0782786	7.8e-05	0.0011079	1.05821	0.0009102	2.13343	0.0468525	0.01695	0.0028	0.0174	0.06	0.0177	0.022	0.0075213	0.0003604	4.42899	0.0112676	99.9984	0.194424	75.8004	0.188902	0.210361	5.00385e-18	NM-254E	0.009546	1.19e-05	1.85538	1.00022	0.000698	7.8e-06	4e-05	2e-06	0.000273	2e-07	0.0123	0	0.008068
61414-56B	CM-SS4	ARGUS VI (Obama)	2012-12-10	21.95	3	166.062	0.0675286	36.9649	0.0192096	0.4907	0.095268	0.212559	0.0659806	0.0016974	0.0004451	1.05821	0.0009102	2.04534	0.0474985	0.01695	0.0028	0.0174	0.06	0.0177	0.022	0.0071599	0.0003654	4.47118	0.004654	99.7056	0.0986272	76.5076	0.0779942	0.121689	3.69649e-18	NM-254E	0.009546	1.19e-05	1.89446	1.00023	0.000698	7.8e-06	4e-05	2e-06	0.000273	2e-07	0.0123	0	0.008068
61414-57A	CM-SS4	ARGUS VI (Obama)	2012-12-09	20.7833	0.1	0.535527	0.119562	0.177089	0.0530857	0.1262	0.0968297	-0.0072369	0.104772	-0.0004434	0.0009007	1.05821	0.0009102	2.13247	0.0468526	0.01695	0.0028	0.0174	0.06	0.0177	0.022	0.007518	0.0003604	3.76971	2.00947	124.995	61.7432	64.714	33.8937	33.8938	1.77089e-20	NM-254E	0.009546	1.19e-05	1.85561	1.00022	0.000698	7.8e-06	4e-05	2e-06	0.000273	2e-07	0.0123	0	0.008068
61414-57B	CM-SS4	ARGUS VI (Obama)	2012-12-10	22.0833	3	2155.01	0.166908	49.1924	0.0241683	0.3845	0.0906863	0.0509662	0.0674668	0.0022115	0.0004774	1.05821	0.0009102	2.04526	0.0475232	0.01695	0.0028	0.0174	0.06	0.0177	0.022	0.0071591	0.0003656	43.7863	0.021974	99.9694	0.0127944	639.275	0.270788	0.7251	4.91924e-18	NM-254E	0.009546	1.19e-05	1.89465	1.00023	0.000698	7.8e-06	4e-05	2e-06	0.000273	2e-07	0.0123	0	0.008068
61414-58A	CM-SS4	ARGUS VI (Obama)	2012-12-09	21.3833	0.1	28.5356	0.105925	6.49429	0.0690721	0.0113	0.101607	0.0828015	0.0946652	0.0013759	0.0009592	1.05821	0.0009102	2.1287	0.0468522	0.01695	0.0028	0.0174	0.06	0.0177	0.022	0.0075048	0.0003604	4.32365	0.0657863	98.5803	1.13166	74.0337	1.10398	1.10768	6.49429e-19	NM-254E	0.009546	1.19e-05	1.85654	1.00022	0.000698	7.8e-06	4e-05	2e-06	0.000273	2e-07	0.0123	0	0.008068
61414-58B	CM-SS4	ARGUS VI (Obama)	2012-12-10	22.2	3	737.903	0.0922054	170.649	0.0331262	2.1194	0.0960469	0.892095	0.0616918	0.0013584	0.0004578	1.05821	0.0009102	2.04519	0.0475483	0.01695	0.0028	0.0174	0.06	0.0177	0.022	0.0071584	0.0003658	4.31411	0.0012809	99.9549	0.0257263	73.8734	0.0214968	0.0927815	1.70649e-17	NM-254E	0.009546	1.19e-05	1.89485	1.00023	0.000698	7.8e-06	4e-05	2e-06	0.000273	2e-07	0.0123	0	0.008068
61414-59A	CM-SS4	ARGUS VI (Obama)	2012-12-09	21.75	0.1	209.69	0.205414	45.01	0.16006	0.7545	0.104043	0.0701984	0.101446	0.0021515	0.0012186	1.05821	0.0009102	2.12645	0.0468514	0.01695	0.0028	0.0174	0.06	0.0177	0.022	0.0074968	0.0003604	4.63664	0.018942	99.698	0.222076	79.2784	0.316961	0.33139	4.501e-18	NM-254E	0.009546	1.19e-05	1.8571	1.00022	0.000698	7.8e-06	4e-05	2e-06	0.000273	2e-07	0.0123	0	0.008068
61414-59B	CM-SS4	ARGUS VI (Obama)	2012-12-10	22.5333	3	112.481	0.0648343	25.3738	0.0211907	0.24	0.093723	0.120925	0.0689924	0.0005087	0.0004458	1.05821	0.0009102	2.04501	0.0476181	0.01695	0.0028	0.0174	0.06	0.0177	0.022	0.0071563	0.0003663	4.41928	0.0069048	99.8727	0.143851	75.6376	0.11577	0.148103	2.53738e-18	NM-254E	0.009546	1.19e-05	1.89537	1.00023	0.000698	7.8e-06	4e-05	2e-06	0.000273	2e-07	0.0123	0	0.008068
61414-60A	CM-SS4	ARGUS VI (Obama)	2012-12-09	21.9	0.1	55.1585	0.147631	12.4975	0.0610778	-0.0285	0.109	0.0572058	0.0847887	-0.0004684	0.0010282	1.05821	0.0009102	2.12554	0.0468509	0.01695	0.0028	0.0174	0.06	0.0177	0.022	0.0074936	0.0003604	4.41681	0.0347668	100.257	0.673849	75.5962	0.582934	0.590199	1.24975e-18	NM-254E	0.009546	1.19e-05	1.85733	1.00022	0.000698	7.8e-06	4e-05	2e-06	0.000273	2e-07	0.0123	0	0.008068
61414-60B	CM-SS4	ARGUS VI (Obama)	2012-12-10	22.75	3	300.993	0.0676464	69.4465	0.0211907	0.6036	0.0899389	0.22976	0.0645655	0.0003259	0.0004288	1.05821	0.0009102	2.0449	0.0476658	0.01695	0.0028	0.0174	0.06	0.0177	0.022	0.007155	0.0003667	4.32492	0.0024687	99.9725	0.0532095	74.0549	0.0414276	0.0995077	6.94465e-18	NM-254E	0.009546	1.19e-05	1.89571	1.00023	0.000698	7.8e-06	4e-05	2e-06	0.000273	2e-07	0.0123	0	0.008068
61414-61A	CM-SS4	ARGUS VI (Obama)	2012-12-09	22.05	0.1	5.21437	0.128821	1.15731	0.0490908	0.0661	0.116619	0.0852621	0.09138	-0.0015814	0.0009494	1.05821	0.0009102	2.12463	0.0468504	0.01695	0.0028	0.0174	0.06	0.0177	0.022	0.0074904	0.0003604	4.91169	0.340247	109.203	6.55723	83.8752	5.67916	5.68008	1.15731e-19	NM-254E	0.009546	1.19e-05	1.85756	1.00022	0.000698	7.8e-06	4e-05	2e-06	0.000273	2e-07	0.0123	0	0.008068
61414-61B	CM-SS4	ARGUS VI (Obama)	2012-12-10	22.9833	3	341.026	0.0669776	76.5214	0.0241683	0.9107	0.0921954	0.556117	0.0660366	9.35e-05	0.0004652	1.05821	0.0009102	2.04481	0.047718	0.01695	0.0028	0.0174	0.06	0.0177	0.022	0.0071537	0.0003671	4.44879	0.0024578	100.005	0.0494001	76.1323	0.0411973	0.10168	7.65214e-18	NM-254E	0.009546	1.19e-05	1.89607	1.00023	0.000698	7.8e-06	4e-05	2e-06	0.000273	2e-07	0.0123	0	0.008068
61414-62A	CM-SS4	ARGUS VI (Obama)	2012-12-09	22.2	0.1	162.486	0.215163	35.848	0.130059	0.2336	0.1253	0.143979	0.104896	-0.0017007	0.00132	1.05821	0.0009102	2.12372	0.0468498	0.01695	0.0028	0.0174	0.06	0.0177	0.022	0.0074872	0.0003604	4.53896	0.0207046	100.318	0.306854	77.6432	0.346765	0.359481	3.5848e-18	NM-254E	0.009546	1.19e-05	1.85779	1.00022	0.000698	7.8e-06	4e-05	2e-06	0.000273	2e-07	0.0123	0	0.008068
61414-62B	CM-SS4	ARGUS VI (Obama)	2012-12-10	23.1167	3	280.124	0.0663006	62.875	0.0261563	0.6614	0.0862786	0.487719	0.0645844	0.0003757	0.0004294	1.05821	0.0009102	2.04476	0.047747	0.01695	0.0028	0.0174	0.06	0.0177	0.022	0.0071529	0.0003673	4.44603	0.0029495	99.9735	0.0568027	76.0862	0.0494411	0.105241	6.2875e-18	NM-254E	0.009546	1.19e-05	1.89626	1.00023	0.000698	7.8e-06	4e-05	2e-06	0.000273	2e-07	0.0123	0	0.008068
61414-63A	CM-SS4	ARGUS VI (Obama)	2012-12-09	22.6	0.1	181.608	0.0584784	46.9402	0.0182205	0.4693	0.0694622	0.546181	0.0484609	0.0005842	0.000441	1.05821	0.0009102	2.1214	0.0468479	0.01695	0.0028	0.0174	0.06	0.0177	0.022	0.0074789	0.0003604	3.8581	0.0034138	99.9275	0.08573	66.2043	0.0575339	0.0993988	4.69402e-18	NM-254E	0.009546	1.19e-05	1.85839	1.00022	0.000698	7.8e-06	4e-05	2e-06	0.000273	2e-07	0.0123	0	0.008068
61414-63B	CM-SS4	ARGUS VI (Obama)	2012-12-10	10.9667	0.15	120.537	0.0565889	31.175	0.0162468	0.3438	0.0689638	0.34	0.048957	0.0004626	0.0004338	1.05821	0.0009102	2.06582	0.0466723	0.01695	0.0028	0.0174	0.06	0.0177	0.022	0.0072678	0.000359	3.85488	0.0049567	99.9078	0.12646	66.1501	0.0835392	0.116354	3.1175e-18	NM-254E	0.009546	1.19e-05	1.87741	1.00023	0.000698	7.8e-06	4e-05	2e-06	0.000273	2e-07	0.0123	0	0.008068
61414-63C	CM-SS4	ARGUS VI (Obama)	2012-12-10	11.2167	0.3	109.284	0.0614677	28.1721	0.0162468	0.3427	0.0689638	0.368984	0.0489666	-0.0003467	0.0004338	1.05821	0.0009102	2.06509	0.046672	0.01695	0.0028	0.0174	0.06	0.0177	0.022	0.0072647	0.000359	3.87584	0.0055555	100.122	0.142948	66.5033	0.0936126	0.124063	2.81721e-18	NM-254E	0.009546	1.19e-05	1.87778	1.00023	0.000698	7.8e-06	4e-05	2e-06	0.000273	2e-07	0.0123	0	0.008068
61414-63D	CM-SS4	ARGUS VI (Obama)	2012-12-10	11.45	0.5	23.7819	0.0539193	6.05672	0.0123251	0.0845	0.067082	0.0734357	0.047994	0.0004618	0.0004223	1.05821	0.0009102	2.06437	0.0466722	0.01695	0.0028	0.0174	0.06	0.0177	0.022	0.0072616	0.000359	3.89679	0.0239718	99.4459	0.619799	66.8563	0.403857	0.412066	6.05672e-19	NM-254E	0.009546	1.19e-05	1.87815	1.00023	0.000698	7.8e-06	4e-05	2e-06	0.000273	2e-07	0.0123	0	0.008068
61414-63E	CM-SS4	ARGUS VI (Obama)	2012-12-10	11.6833	3	38.5568	0.0534261	9.87218	0.0123251	0.0873	0.0689638	0.131309	0.0489859	0.0001699	0.0004168	1.05821	0.0009102	2.06366	0.0466728	0.01695	0.0028	0.0174	0.06	0.0177	0.022	0.0072585	0.0003591	3.89347	0.0145444	99.8948	0.377978	66.8004	0.24504	0.258324	9.87218e-19	NM-254E	0.009546	1.19e-05	1.87852	1.00023	0.000698	7.8e-06	4e-05	2e-06	0.000273	2e-07	0.0123	0	0.008068
61414-65A	CM-SS4	ARGUS VI (Obama)	2012-12-09	23.2167	0.1	1.88725	0.107719	0.466654	0.0470938	-0.0155	0.0992018	0.0022312	0.0914668	-5.58833e-06	0.001058	1.05821	0.0009102	2.11785	0.046844	0.01695	0.0028	0.0174	0.06	0.0177	0.022	0.0074663	0.0003604	4.03941	0.822747	100.08	18.5969	69.2574	13.8428	13.8431	4.66654e-20	NM-254E	0.009546	1.19e-05	1.85933	1.00022	0.000698	7.8e-06	4e-05	2e-06	0.000273	2e-07	0.0123	0	0.008068
61414-65B	CM-SS4	ARGUS VI (Obama)	2012-12-10	23.7667	3	146.177	0.059331	33.375	0.0221826	0.535	0.0960469	0.185175	0.0646193	0.0002928	0.0004537	1.05821	0.0009102	2.04456	0.0479079	0.01695	0.0028	0.0174	0.06	0.0177	0.022	0.0071493	0.0003686	4.36969	0.0052985	99.9519	0.109142	74.8061	0.0888776	0.127469	3.3375e-18	NM-254E	0.009546	1.19e-05	1.89729	1.00023	0.000698	7.8e-06	4e-05	2e-06	0.000273	2e-07	0.0123	0	0.008068
61414-67A	CM-SS4	ARGUS VI (Obama)	2012-12-09	23.5167	0.1	637.878	0.343212	56.0255	0.170061	0.3006	0.1253	0.171659	0.0914896	0.0010475	0.00132	1.05821	0.0009102	2.11611	0.0468416	0.01695	0.0028	0.0174	0.06	0.0177	0.022	0.0074601	0.0003604	11.372	0.035779	99.9523	0.0980105	188.65	0.563976	0.606632	5.60255e-18	NM-254E	0.009546	1.19e-05	1.85979	1.00022	0.000698	7.8e-06	4e-05	2e-06	0.000273	2e-07	0.0123	0	0.008068
61414-67B	CM-SS4	ARGUS VI (Obama)	2012-12-11	0.0166667	3	168.067	0.0611998	14.2576	0.017233	0.1561	0.0899389	0.0584485	0.0675744	-0.0001249	0.0004541	1.05821	0.0009102	2.04452	0.0479731	0.01695	0.0028	0.0174	0.06	0.0177	0.022	0.007148	0.0003691	11.7828	0.0176586	100.025	0.0957136	195.113	0.277368	0.360779	1.42576e-18	NM-254E	0.009546	1.19e-05	1.89768	1.00023	0.000698	7.8e-06	4e-05	2e-06	0.000273	2e-07	0.0123	0	0.008068
61414-68A	CM-SS4	ARGUS VI (Obama)	2012-12-09	23.9	0.1	277.867	0.205411	63.1571	0.130059	1.0243	0.113208	0.238687	0.0800829	-0.0001516	0.001048	1.05821	0.0009102	2.11394	0.0468382	0.01695	0.0028	0.0174	0.06	0.0177	0.022	0.0074523	0.0003603	4.39264	0.0108251	100.025	0.15383	75.191	0.181545	0.20345	6.31571e-18	NM-254E	0.009546	1.19e-05	1.86038	1.00022	0.000698	7.8e-06	4e-05	2e-06	0.000273	2e-07	0.0123	0	0.008068
61414-68B	CM-SS4	ARGUS VI (Obama)	2012-12-11	0.15	3	167.998	0.0685974	38.3536	0.0221826	0.4298	0.0944934	0.097171	0.0706049	-1.47474e-06	0.0004735	1.05821	0.0009102	2.0445	0.0480063	0.01695	0.0028	0.0174	0.06	0.0177	0.022	0.0071474	0.0003693	4.37238	0.0048151	100.005	0.102205	74.8511	0.0807682	0.121993	3.83536e-18	NM-254E	0.009546	1.19e-05	1.89787	1.00023	0.000698	7.8e-06	4e-05	2e-06	0.000273	2e-07	0.0123	0	0.008068
61414-69A	CM-SS4	ARGUS VI (Obama)	2012-12-10	0.266667	0.1	1262.03	0.472328	31.6351	0.170061	0.5626	0.1253	0.0800207	0.0882332	0.003216	0.000891	1.05821	0.0009102	2.11189	0.0468344	0.01695	0.0028	0.0174	0.06	0.0177	0.022	0.0074449	0.0003603	39.8554	0.214979	99.9248	0.0569532	590.182	2.72121	2.79294	3.16351e-18	NM-254E	0.009546	1.19e-05	1.86095	1.00022	0.000698	7.8e-06	4e-05	2e-06	0.000273	2e-07	0.0123	0	0.008068
61414-69B	CM-SS4	ARGUS VI (Obama)	2012-12-11	0.266667	3	2691.42	0.157505	50.5606	0.0241683	0.5933	0.0921954	0.115972	0.0675882	0.0016066	0.0004672	1.05821	0.0009102	2.04448	0.0480403	0.01695	0.0028	0.0174	0.06	0.0177	0.022	0.0071468	0.0003696	53.2143	0.025779	99.9825	0.0097647	751.919	0.298716	0.824685	5.05606e-18	NM-254E	0.009546	1.19e-05	1.89807	1.00023	0.000698	7.8e-06	4e-05	2e-06	0.000273	2e-07	0.0123	0	0.008068
61414-70A	CM-SS4	ARGUS VI (Obama)	2012-12-10	0.416667	0.1	248.436	0.20541	25.678	0.0950624	0.1563	0.116619	0.21478	0.0999681	-0.0003724	0.0012185	1.05821	0.0009102	2.11106	0.0468328	0.01695	0.0028	0.0174	0.06	0.0177	0.022	0.0074419	0.0003603	9.67195	0.03935	100.051	0.187388	161.654	0.629479	0.658365	2.5678e-18	NM-254E	0.009546	1.19e-05	1.86118	1.00022	0.000698	7.8e-06	4e-05	2e-06	0.000273	2e-07	0.0123	0	0.008068
61414-70B	CM-SS4	ARGUS VI (Obama)	2012-12-11	0.6	3	741.2	0.0942228	76.42	0.0221826	0.9043	0.0921954	0.167076	0.0632262	0.0004179	0.0004614	1.05821	0.0009102	2.04446	0.0481345	0.01695	0.0028	0.0174	0.06	0.0177	0.022	0.0071451	0.0003703	9.68952	0.0035625	99.9849	0.0258818	161.935	0.056981	0.201424	7.642e-18	NM-254E	0.009546	1.19e-05	1.89859	1.00023	0.000698	7.8e-06	4e-05	2e-06	0.000273	2e-07	0.0123	0	0.008068
61414-71A	CM-SS4	ARGUS VI (Obama)	2012-12-10	0.566667	0.1	106.464	0.166713	1.62871	0.0500895	-0.0185	0.116619	0.0305272	0.0785331	0.001017	0.0012185	1.05821	0.0009102	2.11023	0.0468311	0.01695	0.0028	0.0174	0.06	0.0177	0.022	0.0074389	0.0003603	65.1747	2.01963	99.7171	0.406593	885.515	21.7555	21.7731	1.62871e-19	NM-254E	0.009546	1.19e-05	1.86141	1.00022	0.000698	7.8e-06	4e-05	2e-06	0.000273	2e-07	0.0123	0	0.008068
61414-71B	CM-SS4	ARGUS VI (Obama)	2012-12-11	0.733333	3	2419.09	0.129307	34.7835	0.0221826	0.3021	0.093723	-0.0007595	0.0661312	0.0006619	0.0004616	1.05821	0.0009102	2.04445	0.0481709	0.01695	0.0028	0.0174	0.06	0.0177	0.022	0.0071445	0.0003706	69.533	0.0446803	99.9918	0.0094641	931.871	0.469262	1.02419	3.47835e-18	NM-254E	0.009546	1.19e-05	1.89879	1.00023	0.000698	7.8e-06	4e-05	2e-06	0.000273	2e-07	0.0123	0	0.008068
61414-73A	CM-SS4	ARGUS VI (Obama)	2012-12-10	1.33333	0.1	15.2978	0.128811	0.958964	0.0490909	0.2616	0.0906863	0.0370652	0.0866647	0.0010326	0.0012185	1.05821	0.0009102	2.10617	0.0468216	0.01695	0.0028	0.0174	0.06	0.0177	0.022	0.0074242	0.0003602	15.6312	0.895831	98.0331	2.65217	254.584	13.6212	13.6244	9.58964e-20	NM-254E	0.009546	1.19e-05	1.86257	1.00022	0.000698	7.8e-06	4e-05	2e-06	0.000273	2e-07	0.0123	0	0.008068
61414-73B	CM-SS4	ARGUS VI (Obama)	2012-12-11	1.16667	3	749.747	0.0934522	69.8375	0.0211907	0.7444	0.087	0.0854766	0.060456	0.0005137	0.0004624	1.05821	0.0009102	2.04447	0.0483045	0.01695	0.0028	0.0174	0.06	0.0177	0.022	0.0071425	0.0003716	10.7254	0.0040377	99.9802	0.0255096	178.429	0.0640009	0.221385	6.98375e-18	NM-254E	0.009546	1.19e-05	1.89948	1.00023	0.000698	7.8e-06	4e-05	2e-06	0.000273	2e-07	0.0123	0	0.008068
61414-74A	CM-SS4	ARGUS VI (Obama)	2012-12-10	1.48333	0.1	222.49	0.195684	50.1992	0.230068	0.2325	0.0891964	0.241792	0.100055	0.0030145	0.0012185	1.05821	0.0009102	2.10538	0.0468195	0.01695	0.0028	0.0174	0.06	0.0177	0.022	0.0074213	0.0003602	4.40645	0.0218389	99.6016	0.205475	75.4226	0.366206	0.377613	5.01992e-18	NM-254E	0.009546	1.19e-05	1.86281	1.00022	0.000698	7.8e-06	4e-05	2e-06	0.000273	2e-07	0.0123	0	0.008068
61414-74B	CM-SS4	ARGUS VI (Obama)	2012-12-11	1.3	3	176.05	0.0667315	40.3421	0.0192096	0.5586	0.0921954	0.17819	0.0661622	5.4e-05	0.000469	1.05821	0.0009102	2.04449	0.0483435	0.01695	0.0028	0.0174	0.06	0.0177	0.022	0.007142	0.0003719	4.35585	0.0043685	99.9997	0.0960522	74.5738	0.0732876	0.116916	4.03421e-18	NM-254E	0.009546	1.19e-05	1.89968	1.00023	0.000698	7.8e-06	4e-05	2e-06	0.000273	2e-07	0.0123	0	0.008068
61414-77A	CM-SS4	ARGUS VI (Obama)	2012-12-10	1.93333	0.1	294.729	0.224925	31.9202	0.140059	0.3805	0.102416	0.680178	0.0802172	0.0031612	0.0015247	1.05821	0.0009102	2.10303	0.0468129	0.01695	0.0028	0.0174	0.06	0.0177	0.022	0.0074127	0.0003601	9.1976	0.0434051	99.6988	0.188274	154.05	0.69724	0.721155	3.19202e-18	NM-254E	0.009546	1.19e-05	1.8635	1.00022	0.000698	7.8e-06	4e-05	2e-06	0.000273	2e-07	0.0123	0	0.008068
61414-77B	CM-SS4	ARGUS VI (Obama)	2012-12-11	1.88333	3	128.443	0.0689678	13.9615	0.0182207	0.2752	0.0921954	0.332413	0.0676781	0.0025095	0.0004702	1.05821	0.0009102	2.0446	0.0485341	0.01695	0.0028	0.0174	0.06	0.0177	0.022	0.0071395	0.0003734	9.14039	0.0163677	99.4397	0.132998	153.131	0.263056	0.32052	1.39615e-18	NM-254E	0.009546	1.19e-05	1.90059	1.00023	0.000698	7.8e-06	4e-05	2e-06	0.000273	2e-07	0.0123	0	0.008068
61414-78A	CM-SS4	ARGUS VI (Obama)	2012-12-10	2.31667	0.1	7.58094	0.119544	1.20932	0.0550835	0.1878	0.102416	0.0441791	0.10697	-0.0001856	0.0013199	1.05821	0.0009102	2.10106	0.0468069	0.01695	0.0028	0.0174	0.06	0.0177	0.022	0.0074054	0.0003601	6.31185	0.445542	100.814	5.65963	107.098	7.34293	7.34408	1.20932e-19	NM-254E	0.009546	1.19e-05	1.8641	1.00022	0.000698	7.8e-06	4e-05	2e-06	0.000273	2e-07	0.0123	0	0.008068
61414-78B	CM-SS4	ARGUS VI (Obama)	2012-12-11	2	3	139.088	0.061674	31.0431	0.0211907	0.541	0.0906863	0.24216	0.0662008	0.0014772	0.0004836	1.05821	0.0009102	2.04463	0.0485765	0.01695	0.0028	0.0174	0.06	0.0177	0.022	0.007139	0.0003737	4.45897	0.0059025	99.699	0.121371	76.303	0.0989286	0.135891	3.10431e-18	NM-254E	0.009546	1.19e-05	1.90079	1.00023	0.000698	7.8e-06	4e-05	2e-06	0.000273	2e-07	0.0123	0	0.008068
61414-79A	CM-SS4	ARGUS VI (Obama)	2012-12-10	2.68333	0.1	113.975	0.166704	25.9559	0.120059	0.4436	0.1253	0.116355	0.113928	-0.0003054	0.0012185	1.05821	0.0009102	2.0992	0.0468008	0.01695	0.0028	0.0174	0.06	0.0177	0.022	0.0073986	0.00036	4.387	0.0255034	100.09	0.380692	75.0963	0.427732	0.437456	2.59559e-18	NM-254E	0.009546	1.19e-05	1.86466	1.00022	0.000698	7.8e-06	4e-05	2e-06	0.000273	2e-07	0.0123	0	0.008068
61414-79B	CM-SS4	ARGUS VI (Obama)	2012-12-11	2.13333	3	53.5937	0.0610971	12.2646	0.0192096	0.2138	0.0877268	0.0589304	0.0662076	0.0002058	0.0004522	1.05821	0.0009102	2.04467	0.0486195	0.01695	0.0028	0.0174	0.06	0.0177	0.022	0.0071386	0.000374	4.35722	0.0138743	99.8963	0.299365	74.5969	0.232757	0.249958	1.22646e-18	NM-254E	0.009546	1.19e-05	1.90098	1.00023	0.000698	7.8e-06	4e-05	2e-06	0.000273	2e-07	0.0123	0	0.008068
61414-80A	CM-SS4	ARGUS VI (Obama)	2012-12-10	2.85	0.1	97.0825	0.157131	21.2758	0.140059	0.3	0.116619	0.0341276	0.0851341	0.0004774	0.0010579	1.05821	0.0009102	2.09846	0.0467983	0.01695	0.0028	0.0174	0.06	0.0177	0.022	0.0073958	0.00036	4.54846	0.0342645	99.8567	0.397978	77.8023	0.573819	0.581623	2.12758e-18	NM-254E	0.009546	1.19e-05	1.86489	1.00022	0.000698	7.8e-06	4e-05	2e-06	0.000273	2e-07	0.0123	0	0.008068
61414-80B	CM-SS4	ARGUS VI (Obama)	2012-12-11	2.25	3	211.197	0.0629929	41.3775	0.0221826	0.4902	0.0891964	0.250955	0.0647517	0.0004909	0.0004466	1.05821	0.0009102	2.04471	0.0486632	0.01695	0.0028	0.0174	0.06	0.0177	0.022	0.0071381	0.0003744	5.09305	0.0044906	99.9402	0.0760094	86.8998	0.07483	0.129587	4.13775e-18	NM-254E	0.009546	1.19e-05	1.90118	1.00023	0.000698	7.8e-06	4e-05	2e-06	0.000273	2e-07	0.0123	0	0.008068
61414-81A	CM-SS4	ARGUS VI (Obama)	2012-12-10	3.21667	0.1	18.3194	0.1288	4.2537	0.0700716	0.008	0.116619	0.0792823	0.0787041	0.000328	0.0010978	1.05821	0.0009102	2.09664	0.0467918	0.01695	0.0028	0.0174	0.06	0.0177	0.022	0.0073891	0.00036	4.27705	0.108709	99.4969	2.04685	73.2514	1.82506	1.82725	4.2537e-19	NM-254E	0.009546	1.19e-05	1.86547	1.00022	0.000698	7.8e-06	4e-05	2e-06	0.000273	2e-07	0.0123	0	0.008068
61414-81B	CM-SS4	ARGUS VI (Obama)	2012-12-11	2.78333	3	302.078	0.0650838	68.6631	0.0211907	0.6182	0.0877268	0.429472	0.0662432	0.0009596	0.0004787	1.05821	0.0009102	2.04492	0.0488559	0.01695	0.0028	0.0174	0.06	0.0177	0.022	0.0071362	0.0003758	4.38766	0.0026583	99.9155	0.0563662	75.1075	0.0445828	0.101994	6.86631e-18	NM-254E	0.009546	1.19e-05	1.902	1.00023	0.000698	7.8e-06	4e-05	2e-06	0.000273	2e-07	0.0123	0	0.008068
61414-82A	CM-SS4	ARGUS VI (Obama)	2012-12-10	3.6	0.1	8.69121	0.119536	2.08332	0.0640756	-0.0296	0.116619	0.129878	0.103646	0.0021671	0.0010778	1.05821	0.0009102	2.09478	0.0467849	0.01695	0.0028	0.0174	0.06	0.0177	0.022	0.0073821	0.0003599	3.85859	0.203044	92.6669	4.15322	66.2125	3.42193	3.42289	2.08332e-19	NM-254E	0.009546	1.19e-05	1.86606	1.00022	0.000698	7.8e-06	4e-05	2e-06	0.000273	2e-07	0.0123	0	0.008068
61414-82B	CM-SS4	ARGUS VI (Obama)	2012-12-10	13.6333	0.15	221.33	0.138133	50.4265	0.0580807	0.6741	0.087	0.302925	0.0640823	-0.0004761	0.0005633	1.05821	0.0009102	2.05839	0.0466971	0.01695	0.0028	0.0174	0.06	0.0177	0.022	0.0072349	0.0003592	4.38443	0.0066484	100.076	0.11666	75.0532	0.111507	0.14435	5.04265e-18	NM-254E	0.009546	1.19e-05	1.88152	1.00023	0.000698	7.8e-06	4e-05	2e-06	0.000273	2e-07	0.0123	0	0.008068
61414-82C	CM-SS4	ARGUS VI (Obama)	2012-12-10	13.8	3	92.5877	0.0816701	20.9204	0.0221825	0.329	0.0762168	0.0511846	0.0547014	-7.5e-05	0.0005314	1.05821	0.0009102	2.05796	0.0467012	0.01695	0.0028	0.0174	0.06	0.0177	0.022	0.0072329	0.0003593	4.41898	0.0097283	100.03	0.212172	75.6326	0.163111	0.187446	2.09204e-18	NM-254E	0.009546	1.19e-05	1.88179	1.00023	0.000698	7.8e-06	4e-05	2e-06	0.000273	2e-07	0.0123	0	0.008068
61414-84A	CM-SS4	ARGUS VI (Obama)	2012-12-10	3.9	0.1	833.325	0.363027	70.7019	0.15006	0.7489	0.116619	0.0718611	0.0740283	0.0060246	0.0012184	1.05821	0.0009102	2.09336	0.0467793	0.01695	0.0028	0.0174	0.06	0.0177	0.022	0.0073768	0.0003599	11.7531	0.0259978	99.7849	0.0754656	194.646	0.408456	0.468854	7.07019e-18	NM-254E	0.009546	1.19e-05	1.86652	1.00022	0.000698	7.8e-06	4e-05	2e-06	0.000273	2e-07	0.0123	0	0.008068
61414-84B	CM-SS4	ARGUS VI (Obama)	2012-12-11	2.91667	3	278.84	0.0651193	23.7002	0.0211907	0.3908	0.0944934	-0.105382	0.0662501	0.0004436	0.00046	1.05821	0.0009102	2.04497	0.0489032	0.01695	0.0028	0.0174	0.06	0.0177	0.022	0.0071358	0.0003762	11.7513	0.0123135	99.9501	0.0592983	194.619	0.193463	0.300668	2.37002e-18	NM-254E	0.009546	1.19e-05	1.9022	1.00023	0.000698	7.8e-06	4e-05	2e-06	0.000273	2e-07	0.0123	0	0.008068
61414-85A	CM-SS4	ARGUS VI (Obama)	2012-12-10	4.05	0.1	405.477	0.234708	33.9447	0.180062	0.2326	0.134164	0.329109	0.0885086	-0.0002372	0.0012184	1.05821	0.0009102	2.09265	0.0467764	0.01695	0.0028	0.0174	0.06	0.0177	0.022	0.0073741	0.0003599	11.94	0.0646488	100.023	0.121431	197.582	1.01408	1.04061	3.39447e-18	NM-254E	0.009546	1.19e-05	1.86676	1.00022	0.000698	7.8e-06	4e-05	2e-06	0.000273	2e-07	0.0123	0	0.008068
61414-85B	CM-SS4	ARGUS VI (Obama)	2012-12-11	3.03333	3	638.67	0.0954997	54.6046	0.0281461	0.6029	0.088459	0.0892223	0.0662568	0.0032356	0.0004603	1.05821	0.0009102	2.04504	0.048951	0.01695	0.0028	0.0174	0.06	0.0177	0.022	0.0071354	0.0003766	11.6707	0.0067547	99.8499	0.0301747	193.351	0.1062	0.252189	5.46046e-18	NM-254E	0.009546	1.19e-05	1.90239	1.00023	0.000698	7.8e-06	4e-05	2e-06	0.000273	2e-07	0.0123	0	0.008068
61414-86A	CM-SS4	ARGUS VI (Obama)	2012-12-10	4.2	0.1	266.125	0.234708	11.9063	0.0770681	0.3681	0.110675	0.119674	0.11407	-0.001519	0.0011177	1.05821	0.0009102	2.09195	0.0467736	0.01695	0.0028	0.0174	0.06	0.0177	0.022	0.0073715	0.0003598	22.3828	0.148924	100.175	0.176875	354.468	2.14416	2.18147	1.19063e-18	NM-254E	0.009546	1.19e-05	1.86699	1.00022	0.000698	7.8e-06	4e-05	2e-06	0.000273	2e-07	0.0123	0	0.008068
61414-86B	CM-SS4	ARGUS VI (Obama)	2012-12-11	3.16667	3	123.749	0.0678967	3.89415	0.0162469	-0.0168	0.0862786	0.0572679	0.0738832	0.0004593	0.0004376	1.05821	0.0009102	2.0451	0.0489997	0.01695	0.0028	0.0174	0.06	0.0177	0.022	0.0071349	0.000377	31.7362	0.137735	99.8923	0.130976	484.411	1.84716	1.92185	3.89415e-19	NM-254E	0.009546	1.19e-05	1.90259	1.00023	0.000698	7.8e-06	4e-05	2e-06	0.000273	2e-07	0.0123	0	0.008068
61414-87A	CM-SS4	ARGUS VI (Obama)	2012-12-10	4.35	0.1	133.8	0.166696	15.1924	0.093063	0.1074	0.116619	0.0573237	0.093529	0.0004827	0.0009492	1.05821	0.0009102	2.09125	0.0467707	0.01695	0.0028	0.0174	0.06	0.0177	0.022	0.0073689	0.0003598	8.7897	0.0580672	99.8949	0.275459	147.486	0.936116	0.952636	1.51924e-18	NM-254E	0.009546	1.19e-05	1.86722	1.00022	0.000698	7.8e-06	4e-05	2e-06	0.000273	2e-07	0.0123	0	0.008068
61414-87B	CM-SS4	ARGUS VI (Obama)	2012-12-11	3.28333	3	5022.48	0.244961	64.6025	0.0251621	0.6392	0.0813941	0.330133	0.0648065	0.002065	0.0005214	1.05821	0.0009102	2.04517	0.049049	0.01695	0.0028	0.0174	0.06	0.0177	0.022	0.0071346	0.0003773	77.7273	0.030609	99.9882	0.0075618	1015.97	0.30704	1.0193	6.46025e-18	NM-254E	0.009546	1.19e-05	1.90278	1.00023	0.000698	7.8e-06	4e-05	2e-06	0.000273	2e-07	0.0123	0	0.008068
61414-28B	CM-SS4	ARGUS VI (Obama)	2012-12-10	16.0333	3	891.895	0.106796	204.088	0.0341229	2.3433	0.0914385	0.830448	0.0686238	0.0021261	0.0004663	1.05821	0.0009102	2.05303	0.04679	0.01695	0.0028	0.0174	0.06	0.0177	0.022	0.0072089	0.00036	4.3593	0.0011297	99.9361	0.0231635	74.6317	0.0189511	0.0931134	2.04088e-17	NM-254E	0.009546	1.19e-05	1.88524	1.00023	0.000698	7.8e-06	4e-05	2e-06	0.000273	2e-07	0.0123	0	0.008068
61414-29B	CM-SS4	ARGUS VI (Obama)	2012-12-10	16.15	3	1520.82	0.119541	347.997	0.044099	4.2851	0.0944934	1.70595	0.0656664	0.0043878	0.0005166	1.05821	0.0009102	2.05278	0.0467974	0.01695	0.0028	0.0174	0.06	0.0177	0.022	0.0072076	0.00036	4.3588	0.0007905	99.923	0.0152242	74.6233	0.0132612	0.092114	3.47997e-17	NM-254E	0.009546	1.19e-05	1.88544	1.00023	0.000698	7.8e-06	4e-05	2e-06	0.000273	2e-07	0.0123	0	0.008068
61414-30B	CM-SS4	ARGUS VI (Obama)	2012-12-10	16.4833	3	261.565	0.0684971	59.3081	0.025162	0.3564	0.0841487	0.356254	0.0716906	0.0028303	0.0004802	1.05821	0.0009102	2.05216	0.0468173	0.01695	0.0028	0.0174	0.06	0.0177	0.022	0.0072044	0.0003602	4.38839	0.0032635	99.6857	0.0662291	75.1196	0.0547335	0.106834	5.93081e-18	NM-254E	0.009546	1.19e-05	1.88594	1.00023	0.000698	7.8e-06	4e-05	2e-06	0.000273	2e-07	0.0123	0	0.008068
61414-49B	CM-SS4	ARGUS VI (Obama)	2012-12-10	20.3	3	171.065	0.0618789	39.0541	0.0221825	0.3572	0.092957	0.161566	0.0766148	2.07e-05	0.0004557	1.05821	0.0009102	2.0467	0.0472123	0.01695	0.0028	0.0174	0.06	0.0177	0.022	0.0071715	0.0003632	4.37227	0.0045635	100.003	0.0947145	74.8493	0.0765478	0.11924	3.90541e-18	NM-254E	0.009546	1.19e-05	1.89187	1.00023	0.000698	7.8e-06	4e-05	2e-06	0.000273	2e-07	0.0123	0	0.008068
61414-50B	CM-SS4	ARGUS VI (Obama)	2012-12-10	20.4167	3	490.258	0.0732582	81.5572	0.0301373	0.9936	0.0906863	0.525993	0.0703888	0.001555	0.0004689	1.05821	0.0009102	2.04657	0.047231	0.01695	0.0028	0.0174	0.06	0.0177	0.022	0.0071705	0.0003633	5.99801	0.002946	99.9141	0.035581	101.918	0.0486903	0.132825	8.15572e-18	NM-254E	0.009546	1.19e-05	1.89206	1.00023	0.000698	7.8e-06	4e-05	2e-06	0.000273	2e-07	0.0123	0	0.008068
61414-64B	CM-SS4	ARGUS VI (Obama)	2012-12-10	23.6333	3	109.093	0.0544798	24.6872	0.0201997	0.143	0.0877268	0.16941	0.0631762	5.4e-05	0.0004415	1.05821	0.0009102	2.0446	0.0478753	0.01695	0.0028	0.0174	0.06	0.0177	0.022	0.00715	0.0003683	4.41076	0.0068119	99.9955	0.140119	75.4948	0.114222	0.146789	2.46872e-18	NM-254E	0.009546	1.19e-05	1.89709	1.00023	0.000698	7.8e-06	4e-05	2e-06	0.000273	2e-07	0.0123	0	0.008068
61414-66B	CM-SS4	ARGUS VI (Obama)	2012-12-10	23.9	3	790.42	0.0967174	66.8466	0.0241683	0.586	0.087	0.0148004	0.0590358	7.23e-05	0.0004478	1.05821	0.0009102	2.04454	0.0479402	0.01695	0.0028	0.0174	0.06	0.0177	0.022	0.0071487	0.0003688	11.816	0.0049363	99.9969	0.0242154	195.634	0.0775126	0.243939	6.68466e-18	NM-254E	0.009546	1.19e-05	1.89748	1.00023	0.000698	7.8e-06	4e-05	2e-06	0.000273	2e-07	0.0123	0	0.008068
61414-72B	CM-SS4	ARGUS VI (Obama)	2012-12-11	1.05	3	204.053	0.0709481	46.7191	0.0241683	0.5167	0.088459	0.215379	0.0646873	0.0011682	0.0004622	1.05821	0.0009102	2.04446	0.0482662	0.01695	0.0028	0.0174	0.06	0.0177	0.022	0.0071431	0.0003713	4.35251	0.0040133	99.8372	0.0837141	74.5179	0.06733	0.113223	4.67191e-18	NM-254E	0.009546	1.19e-05	1.89928	1.00023	0.000698	7.8e-06	4e-05	2e-06	0.000273	2e-07	0.0123	0	0.008068
61414-75B	CM-SS4	ARGUS VI (Obama)	2012-12-11	1.63333	3	229.35	0.0634705	51.3065	0.0251621	0.4753	0.0906863	0.261087	0.0661805	0.0001486	0.0004511	1.05821	0.0009102	2.04454	0.0484511	0.01695	0.0028	0.0174	0.06	0.0177	0.022	0.0071405	0.0003727	4.46164	0.0036356	99.9888	0.0706779	76.3478	0.0609337	0.111366	5.13065e-18	NM-254E	0.009546	1.19e-05	1.9002	1.00023	0.000698	7.8e-06	4e-05	2e-06	0.000273	2e-07	0.0123	0	0.008068
61414-76B	CM-SS4	ARGUS VI (Obama)	2012-12-11	1.75	3	4307.62	0.235056	67.1243	0.0251621	0.7269	0.0855628	0.130747	0.0661872	0.0070413	0.0005184	1.05821	0.0009102	2.04457	0.0484922	0.01695	0.0028	0.0174	0.06	0.0177	0.022	0.00714	0.0003731	64.1346	0.0244074	99.9515	0.0085114	874.278	0.264536	0.906006	6.71243e-18	NM-254E	0.009546	1.19e-05	1.9004	1.00023	0.000698	7.8e-06	4e-05	2e-06	0.000273	2e-07	0.0123	0	0.008068
61412-01	CM-Ash2	ARGUS VI (Obama)	2012-11-30	12.2	3	22.4298	0.460851	1.60422	0.110067	0.1072	0.115741	0.604043	0.0770942	0.0067798	0.0057067	1.05669	0.000774	2.2272	0.028	0.02603	0.0033	0.0028	0.036	0.0153	0.017	0.0075939	8.1e-05	12.7489	1.4048	91.2108	8.08057	209.409	21.8039	21.811	1.60422e-19	NM-254E	0.0095068	2.67e-05	1.5425	1.00016	0.000698	7.8e-06	4e-05	2e-06	0.000273	2e-07	0.0123	0	0.008068
61412-02	CM-Ash2	ARGUS VI (Obama)	2012-11-30	12.5667	3	24.6622	0.1	5.47512	0.0601	0.0415	0.106283	0.0428946	0.0656443	0.0040398	0.0010598	1.05669	0.000774	2.2272	0.028	0.02603	0.0033	0.0028	0.036	0.0153	0.017	0.0075939	8.1e-05	4.27707	0.0766482	95.1227	1.40025	72.9568	1.28173	1.29737	5.47512e-19	NM-254E	0.0095068	2.67e-05	1.54297	1.00016	0.000698	7.8e-06	4e-05	2e-06	0.000273	2e-07	0.0123	0	0.008068
61412-03	CM-Ash2	ARGUS VI (Obama)	2012-11-30	12.9167	3	27.4484	0.102883	6.22574	0.0481208	0.1655	0.105342	0.024386	0.0656634	0.0018874	0.0012706	1.05669	0.000774	2.2272	0.028	0.02603	0.0033	0.0028	0.036	0.0153	0.017	0.0075939	8.1e-05	4.31094	0.0713272	97.9581	1.47876	73.5232	1.19238	1.20944	6.22574e-19	NM-254E	0.0095068	2.67e-05	1.54342	1.00016	0.000698	7.8e-06	4e-05	2e-06	0.000273	2e-07	0.0123	0	0.008068
61412-05	CM-Ash2	ARGUS VI (Obama)	2012-12-01	13.65	3	137.768	0.221775	31.1851	0.120065	0.3252	0.144555	0.286361	0.0876718	-0.0029312	0.0014816	1.05669	0.000774	2.2272	0.028	0.02603	0.0033	0.0028	0.036	0.0153	0.017	0.0075939	8.1e-05	4.43845	0.0233278	100.652	0.394302	75.6534	0.389519	0.441643	3.1185e-18	NM-254E	0.0095068	2.67e-05	1.57514	1.00016	0.000698	7.8e-06	4e-05	2e-06	0.000273	2e-07	0.0123	0	0.008068
61412-06	CM-Ash2	ARGUS VI (Obama)	2012-12-01	13.7833	3	38.4671	0.039598	9.60284	0.014386	0.129	0.0502096	0.0248899	0.0346926	5.93e-05	0.0002562	1.05669	0.000774	2.2272	0.028	0.02603	0.0033	0.0028	0.036	0.0153	0.017	0.0075939	8.1e-05	3.99613	0.0107856	99.9596	0.24678	68.2529	0.180823	0.260962	9.60284e-19	NM-254E	0.0095068	2.67e-05	1.57531	1.00016	0.000698	7.8e-06	4e-05	2e-06	0.000273	2e-07	0.0123	0	0.008068
61412-08	CM-Ash2	ARGUS VI (Obama)	2012-12-01	14.55	3	918.771	0.430911	26.5553	0.110067	0.5252	0.134892	-0.0871705	0.0952729	0.0032611	0.0019038	1.05669	0.000774	2.2272	0.028	0.02603	0.0033	0.0028	0.036	0.0153	0.017	0.0075939	8.1e-05	34.5535	0.145743	99.8937	0.0906218	519.943	1.90912	2.29361	2.65553e-18	NM-254E	0.0095068	2.67e-05	1.57632	1.00016	0.000698	7.8e-06	4e-05	2e-06	0.000273	2e-07	0.0123	0	0.008068
61412-10	CM-Ash2	ARGUS VI (Obama)	2012-12-01	14.8167	3	80.6308	0.162432	18.375	0.110067	0.2952	0.144555	0.297043	0.0743711	-0.0003528	0.0012706	1.05669	0.000774	2.2272	0.028	0.02603	0.0033	0.0028	0.036	0.0153	0.017	0.0075939	8.1e-05	4.38714	0.0345851	100.162	0.550464	74.7966	0.577759	0.613329	1.8375e-18	NM-254E	0.0095068	2.67e-05	1.57666	1.00016	0.000698	7.8e-06	4e-05	2e-06	0.000273	2e-07	0.0123	0	0.008068
61412-11	CM-Ash2	ARGUS VI (Obama)	2012-12-01	14.95	3	24.3043	0.028	6.3169	0.0033005	0.0187	0.0502096	0.0288561	0.0337457	0.0002632	0.0002563	1.05669	0.000774	2.2272	0.028	0.02603	0.0033	0.0028	0.036	0.0153	0.017	0.0075939	8.1e-05	3.82729	0.0130392	99.6834	0.354753	65.42	0.218944	0.283747	6.3169e-19	NM-254E	0.0095068	2.67e-05	1.57683	1.00016	0.000698	7.8e-06	4e-05	2e-06	0.000273	2e-07	0.0123	0	0.008068
61412-12	CM-Ash2	ARGUS VI (Obama)	2012-12-01	15.1667	3	30.8122	0.0388973	7.26106	0.0134145	0.067	0.0509117	0.0533067	0.0347325	0.0032885	0.0002866	1.05669	0.000774	2.2272	0.028	0.02603	0.0033	0.0028	0.036	0.0153	0.017	0.0075939	8.1e-05	4.10104	0.0149938	96.8267	0.32892	70.0108	0.251133	0.316676	7.26106e-19	NM-254E	0.0095068	2.67e-05	1.57712	1.00016	0.000698	7.8e-06	4e-05	2e-06	0.000273	2e-07	0.0123	0	0.008068
61412-14	CM-Ash2	ARGUS VI (Obama)	2012-12-01	15.95	3	56.4478	0.172291	8.99734	0.0770833	0.2132	0.125284	0.0184642	0.0788751	-0.002202	0.0014816	1.05669	0.000774	2.2272	0.028	0.02603	0.0033	0.0028	0.036	0.0153	0.017	0.0075939	8.1e-05	6.33901	0.0757127	101.169	0.895825	107.116	1.24268	1.27657	8.99734e-19	NM-254E	0.0095068	2.67e-05	1.57813	1.00016	0.000698	7.8e-06	4e-05	2e-06	0.000273	2e-07	0.0123	0	0.008068
61412-15	CM-Ash2	ARGUS VI (Obama)	2012-12-01	16.0833	3	81.2498	0.172291	8.99524	0.0980716	0.1242	0.134892	0.224593	0.0774013	-0.0007861	0.0016927	1.05669	0.000774	2.2272	0.028	0.02603	0.0033	0.0028	0.036	0.0153	0.017	0.0075939	8.1e-05	9.05271	0.115202	100.311	0.690323	151.123	1.8459	1.89031	8.99524e-19	NM-254E	0.0095068	2.67e-05	1.5783	1.00016	0.000698	7.8e-06	4e-05	2e-06	0.000273	2e-07	0.0123	0	0.008068
61412-16	CM-Ash2	ARGUS VI (Obama)	2012-12-01	16.2167	3	10.408	0.039598	2.48298	0.0134145	-0.0121	0.0530754	-0.0247821	0.0379491	0.0003509	0.0002966	1.05669	0.000774	2.2272	0.028	0.02603	0.0033	0.0028	0.036	0.0153	0.017	0.0075939	8.1e-05	4.14051	0.0450108	98.969	1.00636	70.6719	0.753621	0.778365	2.48298e-19	NM-254E	0.0095068	2.67e-05	1.57848	1.00016	0.000698	7.8e-06	4e-05	2e-06	0.000273	2e-07	0.0123	0	0.008068
61412-17	CM-Ash2	ARGUS VI (Obama)	2012-12-01	16.4167	3	20.3308	0.152591	4.41729	0.0920742	0.0932	0.144555	0.0116826	0.0999725	-0.0034595	0.0013761	1.05669	0.000774	2.2272	0.028	0.02603	0.0033	0.0028	0.036	0.0153	0.017	0.0075939	8.1e-05	4.8282	0.141344	105.087	2.29651	82.1498	2.35175	2.36254	4.41729e-19	NM-254E	0.0095068	2.67e-05	1.57873	1.00016	0.000698	7.8e-06	4e-05	2e-06	0.000273	2e-07	0.0123	0	0.008068
61412-18	CM-Ash2	ARGUS VI (Obama)	2012-12-01	16.55	3	253.442	0.281396	4.88177	0.110067	-0.0639	0.106283	0.0333149	0.0863792	0.0045502	0.0012706	1.05669	0.000774	2.2272	0.028	0.02603	0.0033	0.0028	0.036	0.0153	0.017	0.0075939	8.1e-05	51.6306	1.16829	99.4654	0.216492	730.992	13.6372	13.7418	4.88177e-19	NM-254E	0.0095068	2.67e-05	1.5789	1.00016	0.000698	7.8e-06	4e-05	2e-06	0.000273	2e-07	0.0123	0	0.008068
61412-19	CM-Ash2	ARGUS VI (Obama)	2012-12-01	16.9	3	635.741	0.331186	7.75054	0.0780826	0.0962	0.134892	0.0311134	0.0849043	0.0021727	0.0011652	1.05669	0.000774	2.2272	0.028	0.02603	0.0033	0.0028	0.036	0.0153	0.017	0.0075939	8.1e-05	81.9343	0.827849	99.8986	0.0916967	1054.39	8.09832	8.40536	7.75054e-19	NM-254E	0.0095068	2.67e-05	1.57936	1.00016	0.000698	7.8e-06	4e-05	2e-06	0.000273	2e-07	0.0123	0	0.008068
61412-20	CM-Ash2	ARGUS VI (Obama)	2012-12-01	17.0333	3	436.491	0.271448	5.14141	0.0940733	0.0942	0.134892	-0.162218	0.0774614	-0.0032059	0.0017982	1.05669	0.000774	2.2272	0.028	0.02603	0.0033	0.0028	0.036	0.0153	0.017	0.0075939	8.1e-05	85.0704	1.56104	100.216	0.151096	1084.82	15.019	15.1939	5.14141e-19	NM-254E	0.0095068	2.67e-05	1.57953	1.00016	0.000698	7.8e-06	4e-05	2e-06	0.000273	2e-07	0.0123	0	0.008068
61412-22	CM-Ash2	ARGUS VI (Obama)	2012-12-01	17.5	3	21042.7	2.80014	176.829	0.450086	2.2392	0.154259	0.353792	0.0804629	0.0005137	0.0019038	1.05669	0.000774	2.2272	0.028	0.02603	0.0033	0.0028	0.036	0.0153	0.017	0.0075939	8.1e-05	118.992	0.303324	99.9994	0.0190124	1385.14	2.47673	3.68516	1.76829e-17	NM-254E	0.0095068	2.67e-05	1.58014	1.00016	0.000698	7.8e-06	4e-05	2e-06	0.000273	2e-07	0.0123	0	0.008068
61412-24	CM-Ash2	ARGUS VI (Obama)	2012-12-01	17.9667	3	99.0068	0.172291	8.22642	0.0870769	0.1392	0.134892	-0.0330379	0.0864809	0.0090729	0.0016927	1.05669	0.000774	2.2272	0.028	0.02603	0.0033	0.0028	0.036	0.0153	0.017	0.0075939	8.1e-05	11.6982	0.139834	97.2651	0.564792	193.029	2.18988	2.24951	8.22642e-19	NM-254E	0.0095068	2.67e-05	1.58076	1.00016	0.000698	7.8e-06	4e-05	2e-06	0.000273	2e-07	0.0123	0	0.008068
61412-25	CM-Ash2	ARGUS VI (Obama)	2012-12-01	18.1	3	275.05	0.221775	4.15795	0.0601006	-0.1028	0.115741	0.0871094	0.0745725	1.7e-05	0.0013761	1.05669	0.000774	2.2272	0.028	0.02603	0.0033	0.0028	0.036	0.0153	0.017	0.0075939	8.1e-05	66.1432	0.962745	100	0.187737	893.007	10.2859	10.4757	4.15795e-19	NM-254E	0.0095068	2.67e-05	1.58093	1.00016	0.000698	7.8e-06	4e-05	2e-06	0.000273	2e-07	0.0123	0	0.008068
61736-02	CM-Ash2	ARGUS VI (Jan)	2013-08-15	9.86667	4	101.903	0.170846	22.0065	0.0661419	0.2318	0.0410488	-0.158654	0.182288	0.0027242	0.0009489	1.05521	0.0010653	2.92733	0.147622	0.0066	0.012	0.0117	0.023	0.0234	0.013	0.0102573	0.0005233	4.58558	0.0204085	99.1896	0.365305	75.2841	0.328261	0.328265	1.10032e-18	NM-258C	0.0091559	2.1604e-07	6.27091	1.00066	0.000653	3.6e-07	0.00014	0	0.0002633	3.4e-07	0.01077	0	0.007529
61736-03	CM-Ash2	ARGUS VI (Jan)	2013-08-15	14.1167	4	310.113	0.183151	37.7018	0.0710679	0.4398	0.0370135	-0.475739	0.188575	0.0003669	0.0007063	1.05521	0.0010653	2.52688	0.129012	0.0066	0.012	0.0117	0.023	0.0234	0.013	0.0088823	0.0004573	8.21397	0.0171813	99.9532	0.10789	132.734	0.267814	0.267831	1.88509e-18	NM-258C	0.0091559	2.1604e-07	6.29284	1.00066	0.000653	3.6e-07	0.00014	0	0.0002633	3.4e-07	0.01077	0	0.007529
61736-05	CM-Ash2	ARGUS VI (Jan)	2013-08-15	14.8167	4	93.0807	0.128319	22.3542	0.0216476	0.2172	0.0259422	0.0466568	0.10327	0.0001746	0.0004874	1.05521	0.0010653	2.46085	0.126589	0.0066	0.012	0.0117	0.023	0.0234	0.013	0.0086556	0.0004487	4.15416	0.0095711	99.9468	0.250407	68.3317	0.154533	0.154541	1.11771e-18	NM-258C	0.0091559	2.1604e-07	6.29647	1.00066	0.000653	3.6e-07	0.00014	0	0.0002633	3.4e-07	0.01077	0	0.007529
61736-06	CM-Ash2	ARGUS VI (Jan)	2013-08-15	15.1333	4	469.8	0.188065	28.3925	0.0631922	0.3115	0.0452769	-0.0302308	0.200156	-0.0001646	0.0007568	1.05521	0.0010653	2.43128	0.125572	0.0066	0.012	0.0117	0.023	0.0234	0.013	0.008554	0.0004451	16.5407	0.0382626	100.01	0.0743673	258.133	0.55693	0.556959	1.41962e-18	NM-258C	0.0091559	2.1604e-07	6.29809	1.00066	0.000653	3.6e-07	0.00014	0	0.0002633	3.4e-07	0.01077	0	0.007529
61736-07	CM-Ash2	ARGUS VI (Jan)	2013-08-15	15.2833	4	43.5544	0.141903	10.0513	0.0582879	0.1124	0.0332415	0.0598394	0.194451	0.0019234	0.0007904	1.05521	0.0010653	2.41678	0.12509	0.0066	0.012	0.0117	0.023	0.0234	0.013	0.0085043	0.0004434	4.26915	0.036963	98.6929	0.710687	70.1873	0.59619	0.596192	5.02566e-19	NM-258C	0.0091559	2.1604e-07	6.29889	1.00066	0.000653	3.6e-07	0.00014	0	0.0002633	3.4e-07	0.01077	0	0.007529
61736-08	CM-Ash2	ARGUS VI (Jan)	2013-08-15	15.3833	4	291.045	0.159898	22.8908	0.0720544	0.2991	0.0402244	0.362847	0.211758	0.0004131	0.0008251	1.05521	0.0010653	2.40695	0.124769	0.0066	0.012	0.0117	0.023	0.0234	0.013	0.0084705	0.0004423	12.7031	0.0420216	99.9683	0.115009	201.404	0.630897	0.630914	1.14454e-18	NM-258C	0.0091559	2.1604e-07	6.29943	1.00066	0.000653	3.6e-07	0.00014	0	0.0002633	3.4e-07	0.01077	0	0.007529
61736-10	CM-Ash2	ARGUS VI (Jan)	2013-08-15	15.6	4	32.9954	0.140121	4.76124	0.056331	0.0473	0.0378021	0.234379	0.188805	0.0027056	0.0007368	1.05521	0.0010653	2.387	0.124133	0.0066	0.012	0.0117	0.023	0.0234	0.013	0.008402	0.00044	6.75718	0.0970108	97.609	0.893788	109.884	1.53116	1.53116	2.38062e-19	NM-258C	0.0091559	2.1604e-07	6.30052	1.00066	0.000653	3.6e-07	0.00014	0	0.0002633	3.4e-07	0.01077	0	0.007529
61736-11	CM-Ash2	ARGUS VI (Jan)	2013-08-15	15.7	4	77.1952	0.144768	16.841	0.064175	0.1839	0.0418808	-0.0088215	0.211813	0.0016249	0.0007879	1.05521	0.0010653	2.37714	0.123826	0.0066	0.012	0.0117	0.023	0.0234	0.013	0.0083682	0.0004389	4.54745	0.0238902	99.3709	0.404319	74.6706	0.384391	0.384395	8.4205e-19	NM-258C	0.0091559	2.1604e-07	6.30106	1.00066	0.000653	3.6e-07	0.00014	0	0.0002633	3.4e-07	0.01077	0	0.007529
61736-13	CM-Ash2	ARGUS VI (Jan)	2013-08-15	16.35	4	68.7757	0.1235	17.1898	0.0200132	0.16545	0.0250799	0.156918	0.103401	0.0002247	0.0004684	1.05521	0.0010653	2.31567	0.122029	0.0066	0.012	0.0117	0.023	0.0234	0.013	0.0081571	0.0004326	3.99022	0.0118116	99.9191	0.325938	65.6828	0.190983	0.190989	8.59492e-19	NM-258C	0.0091559	2.1604e-07	6.30444	1.00066	0.000653	3.6e-07	0.00014	0	0.0002633	3.4e-07	0.01077	0	0.007529
61736-14	CM-Ash2	ARGUS VI (Jan)	2013-08-15	16.65	4	114.4	0.149242	8.58306	0.0514538	0.0654	0.0362353	0.156389	0.200408	0.0009397	0.0007223	1.05521	0.0010653	2.28694	0.12126	0.0066	0.012	0.0117	0.023	0.0234	0.013	0.0080584	0.0004298	13.2899	0.0853854	99.7647	0.263881	210.193	1.27581	1.27581	4.29153e-19	NM-258C	0.0091559	2.1604e-07	6.30602	1.00066	0.000653	3.6e-07	0.00014	0	0.0002633	3.4e-07	0.01077	0	0.007529
61736-15	CM-Ash2	ARGUS VI (Jan)	2013-08-15	16.7667	4	20.3036	0.135512	4.42332	0.0582879	0.0396	0.0354683	0.109104	0.211998	-0.0003635	0.0007735	1.05521	0.0010653	2.27706	0.121007	0.0066	0.012	0.0117	0.023	0.0234	0.013	0.0080245	0.0004289	4.60903	0.0858594	100.575	1.48296	75.6611	1.38072	1.38072	2.21166e-19	NM-258C	0.0091559	2.1604e-07	6.30657	1.00066	0.000653	3.6e-07	0.00014	0	0.0002633	3.4e-07	0.01077	0	0.007529
61736-16	CM-Ash2	ARGUS VI (Jan)	2013-08-15	17.0833	4	141.064	0.149611	30.7884	0.0700819	0.3303	0.0461411	0.631455	0.206251	0.0028775	0.0007287	1.05521	0.0010653	2.24665	0.12026	0.0066	0.012	0.0117	0.023	0.0234	0.013	0.0079201	0.0004263	4.54801	0.0134639	99.4262	0.215425	74.6796	0.216633	0.21664	1.53942e-18	NM-258C	0.0091559	2.1604e-07	6.30824	1.00066	0.000653	3.6e-07	0.00014	0	0.0002633	3.4e-07	0.01077	0	0.007529
61736-17	CM-Ash2	ARGUS VI (Jan)	2013-08-15	17.1833	4	1729.57	0.268341	18.5322	0.0543774	0.1881	0.0370135	0.0126176	0.235547	0.0007089	0.0007282	1.05521	0.0010653	2.23679	0.120029	0.0066	0.012	0.0117	0.023	0.0234	0.013	0.0078862	0.0004255	93.3087	0.274449	99.9878	0.0253019	1130.37	2.48054	2.48062	9.26611e-19	NM-258C	0.0091559	2.1604e-07	6.30878	1.00066	0.000653	3.6e-07	0.00014	0	0.0002633	3.4e-07	0.01077	0	0.007529
61736-18	CM-Ash2	ARGUS VI (Jan)	2013-08-15	17.2833	4	70.3057	0.141344	15.0933	0.0582879	0.2278	0.0347131	0.248587	0.200513	-0.0012657	0.0007023	1.05521	0.0010653	2.22696	0.119804	0.0066	0.012	0.0117	0.023	0.0234	0.013	0.0078525	0.0004247	4.67706	0.024669	100.569	0.413541	76.7549	0.396471	0.396475	7.54667e-19	NM-258C	0.0091559	2.1604e-07	6.30932	1.00066	0.000653	3.6e-07	0.00014	0	0.0002633	3.4e-07	0.01077	0	0.007529
61736-19	CM-Ash2	ARGUS VI (Jan)	2013-08-15	17.4	4	139.29	0.147298	9.51187	0.0582879	0.0725	0.0354683	-0.347674	0.217942	0.0017932	0.0007974	1.05521	0.0010653	2.21711	0.119585	0.0066	0.012	0.0117	0.023	0.0234	0.013	0.0078186	0.0004239	14.5767	0.0941029	99.5956	0.227139	229.32	1.39144	1.39145	4.75594e-19	NM-258C	0.0091559	2.1604e-07	6.30986	1.00066	0.000653	3.6e-07	0.00014	0	0.0002633	3.4e-07	0.01077	0	0.007529
61736-20	CM-Ash2	ARGUS VI (Jan)	2013-08-15	17.7333	4	80.7797	0.1406	17.6633	0.0799589	0.1344	0.0354683	-0.142011	0.200585	0.0001001	0.0007259	1.05521	0.0010653	2.18581	0.118926	0.0066	0.012	0.0117	0.023	0.0234	0.013	0.0077112	0.0004216	4.5633	0.0253477	99.946	0.364899	74.9257	0.407786	0.407789	8.83163e-19	NM-258C	0.0091559	2.1604e-07	6.31159	1.00066	0.000653	3.6e-07	0.00014	0	0.0002633	3.4e-07	0.01077	0	0.007529
61736-21	CM-Ash2	ARGUS VI (Jan)	2013-08-15	18.05	4	74.3362	0.120025	17.6236	0.0200132	0.1679	0.0254951	0.237883	0.103545	-0.0002226	0.0004563	1.05521	0.0010653	2.15574	0.118347	0.0066	0.012	0.0117	0.023	0.0234	0.013	0.0076079	0.0004195	4.21526	0.0113671	100.113	0.293524	69.3178	0.183432	0.183439	8.81181e-19	NM-258C	0.0091559	2.1604e-07	6.31324	1.00066	0.000653	3.6e-07	0.00014	0	0.0002633	3.4e-07	0.01077	0	0.007529
61736-22	CM-Ash2	ARGUS VI (Jan)	2013-08-15	18.15	4	82.06	0.142702	19.2061	0.064175	0.1981	0.0410488	0.0012628	0.200655	-0.0013339	0.0007158	1.05521	0.0010653	2.14588	0.118169	0.0066	0.012	0.0117	0.023	0.0234	0.013	0.0075741	0.0004189	4.28576	0.019626	100.485	0.359492	70.4552	0.316509	0.316513	9.60304e-19	NM-258C	0.0091559	2.1604e-07	6.31378	1.00066	0.000653	3.6e-07	0.00014	0	0.0002633	3.4e-07	0.01077	0	0.007529
61736-23	CM-Ash2	ARGUS VI (Jan)	2013-08-15	18.25	4	616.222	0.190849	5.11097	0.0524273	0.0606	0.0339706	-0.604281	0.20645	-9.63e-05	0.0007413	1.05521	0.0010653	2.13605	0.117997	0.0066	0.012	0.0117	0.023	0.0234	0.013	0.0075403	0.0004183	120.548	1.23788	99.997	0.0566666	1361.36	9.86186	9.86189	2.55549e-19	NM-258C	0.0091559	2.1604e-07	6.31433	1.00066	0.000653	3.6e-07	0.00014	0	0.0002633	3.4e-07	0.01077	0	0.007529
61736-24	CM-Ash2	ARGUS VI (Jan)	2013-08-15	18.3667	4	190.853	0.154543	18.5998	0.0690963	0.1544	0.0402244	-0.262699	0.183566	0.0013255	0.0008121	1.05521	0.0010653	2.12601	0.117828	0.0066	0.012	0.0117	0.023	0.0234	0.013	0.0075058	0.0004177	10.231	0.0410596	99.781	0.171107	163.907	0.629212	0.629223	9.29988e-19	NM-258C	0.0091559	2.1604e-07	6.31488	1.00066	0.000653	3.6e-07	0.00014	0	0.0002633	3.4e-07	0.01077	0	0.007529
61736-25	CM-Ash2	ARGUS VI (Jan)	2013-08-15	18.6667	4	130.959	0.149125	28.8944	0.0631923	0.307	0.043566	-0.120645	0.206522	-0.0003007	0.0007401	1.05521	0.0010653	2.09633	0.117364	0.0066	0.012	0.0117	0.023	0.0234	0.013	0.0074039	0.000416	4.52755	0.0135532	100.061	0.233887	74.3504	0.218108	0.218114	1.44472e-18	NM-258C	0.0091559	2.1604e-07	6.31651	1.00066	0.000653	3.6e-07	0.00014	0	0.0002633	3.4e-07	0.01077	0	0.007529
61736-26	CM-Ash2	ARGUS VI (Jan)	2013-08-15	18.9833	4	66.523	0.134786	14.625	0.0690963	0.1607	0.0370135	0.273576	0.200794	0.0021322	0.0007133	1.05521	0.0010653	2.06674	0.116955	0.0066	0.012	0.0117	0.023	0.0234	0.013	0.0073023	0.0004146	4.49915	0.027404	99.0758	0.429757	73.8933	0.441115	0.441119	7.31248e-19	NM-258C	0.0091559	2.1604e-07	6.31814	1.00066	0.000653	3.6e-07	0.00014	0	0.0002633	3.4e-07	0.01077	0	0.007529
61736-27	CM-Ash2	ARGUS VI (Jan)	2013-08-15	19.3	4	114.593	0.11847	27.6055	0.0208224	0.3017	0.0259422	0.112872	0.102131	0.00015	0.0004506	1.05521	0.0010653	2.03662	0.116594	0.0066	0.012	0.0117	0.023	0.0234	0.013	0.0071989	0.0004133	4.14228	0.0072131	99.9689	0.188003	68.1399	0.116473	0.116484	1.38028e-18	NM-258C	0.0091559	2.1604e-07	6.3198	1.00066	0.000653	3.6e-07	0.00014	0	0.0002633	3.4e-07	0.01077	0	0.007529
61736-28	CM-Ash2	ARGUS VI (Jan)	2013-08-15	19.85	4	76.6311	0.117821	18.0428	0.0200132	0.15747	0.0250799	0.0468507	0.101802	-0.0001027	0.000449	1.05521	0.0010653	1.98519	0.116111	0.0066	0.012	0.0117	0.023	0.0234	0.013	0.0070223	0.0004116	4.24147	0.0109606	100.043	0.279718	69.7407	0.176831	0.176839	9.0214e-19	NM-258C	0.0091559	2.1604e-07	6.32264	1.00066	0.000653	3.6e-07	0.00014	0	0.0002633	3.4e-07	0.01077	0	0.007529
61736-29	CM-Ash2	ARGUS VI (Jan)	2013-08-15	19.95	4	49.437	0.136561	10.8731	0.0612287	0.1408	0.0339706	0.106862	0.212557	-9.75e-05	0.0006858	1.05521	0.0010653	1.97533	0.116038	0.0066	0.012	0.0117	0.023	0.0234	0.013	0.0069884	0.0004113	4.54278	0.0342109	100.078	0.570886	74.5954	0.550473	0.550476	5.43654e-19	NM-258C	0.0091559	2.1604e-07	6.32318	1.00066	0.000653	3.6e-07	0.00014	0	0.0002633	3.4e-07	0.01077	0	0.007529
61736-30	CM-Ash2	ARGUS VI (Jan)	2013-08-15	20.0667	4	68.2136	0.138109	15.5617	0.0681111	0.1792	0.0378021	-0.541311	0.206758	0.0009848	0.0006857	1.05521	0.0010653	1.9655	0.115971	0.0066	0.012	0.0117	0.023	0.0234	0.013	0.0069547	0.0004111	4.35425	0.0248381	99.5074	0.415375	71.5594	0.400322	0.400326	7.78083e-19	NM-258C	0.0091559	2.1604e-07	6.32372	1.00066	0.000653	3.6e-07	0.00014	0	0.0002633	3.4e-07	0.01077	0	0.007529
61736-31	CM-Ash2	ARGUS VI (Jan)	2013-08-15	20.1667	4	65.6687	0.138604	14.3914	0.0681111	0.1602	0.0362353	0.215025	0.178205	-0.0006002	0.0006771	1.05521	0.0010653	1.95564	0.11591	0.0066	0.012	0.0117	0.023	0.0234	0.013	0.0069208	0.0004109	4.56918	0.0275631	100.299	0.430007	75.0202	0.443404	0.443407	7.1957e-19	NM-258C	0.0091559	2.1604e-07	6.32427	1.00066	0.000653	3.6e-07	0.00014	0	0.0002633	3.4e-07	0.01077	0	0.007529
61736-32	CM-Ash2	ARGUS VI (Jan)	2013-08-15	20.2667	4	106.409	0.133833	22.5295	0.0720545	0.2374	0.0410488	0.335215	0.195251	2.33e-05	0.0006686	1.05521	0.0010653	1.94576	0.115855	0.0066	0.012	0.0117	0.023	0.0234	0.013	0.0068869	0.0004107	4.71645	0.0185038	100.018	0.259199	77.3878	0.297283	0.297288	1.12647e-18	NM-258C	0.0091559	2.1604e-07	6.32481	1.00066	0.000653	3.6e-07	0.00014	0	0.0002633	3.4e-07	0.01077	0	0.007529
61736-33	CM-Ash2	ARGUS VI (Jan)	2013-08-15	20.3667	4	70.181	0.138517	15.5049	0.0671264	0.1384	0.0378021	-0.270093	0.22435	0.0005328	0.0006938	1.05521	0.0010653	1.9359	0.115806	0.0066	0.012	0.0117	0.023	0.0234	0.013	0.0068531	0.0004105	4.50709	0.0253214	99.7413	0.407114	74.0211	0.407564	0.407568	7.75247e-19	NM-258C	0.0091559	2.1604e-07	6.32536	1.00066	0.000653	3.6e-07	0.00014	0	0.0002633	3.4e-07	0.01077	0	0.007529
61736-34	CM-Ash2	ARGUS VI (Jan)	2013-08-15	20.4833	4	56.1752	0.139033	12.0531	0.0524274	0.12	0.0347131	0.0272014	0.20104	-0.0005004	0.0006601	1.05521	0.0010653	1.92605	0.115764	0.0066	0.012	0.0117	0.023	0.0234	0.013	0.0068192	0.0004103	4.66565	0.0285421	100.269	0.497119	76.5715	0.458763	0.458767	6.02653e-19	NM-258C	0.0091559	2.1604e-07	6.3259	1.00066	0.000653	3.6e-07	0.00014	0	0.0002633	3.4e-07	0.01077	0	0.007529
61736-35	CM-Ash2	ARGUS VI (Jan)	2013-08-15	20.5833	4	70.6098	0.133225	15.6907	0.0690963	0.1664	0.0378021	-0.177773	0.195302	0.0007963	0.0006851	1.05521	0.0010653	1.91619	0.115728	0.0066	0.012	0.0117	0.023	0.0234	0.013	0.0067854	0.0004102	4.47653	0.0251498	99.6434	0.394481	73.5292	0.404911	0.404914	7.84533e-19	NM-258C	0.0091559	2.1604e-07	6.32644	1.00066	0.000653	3.6e-07	0.00014	0	0.0002633	3.4e-07	0.01077	0	0.007529
61736-37	CM-Ash2	ARGUS VI (Jan)	2013-08-15	21.7167	4	27.9739	0.117129	6.78808	0.0192221	0.04862	0.0248467	-0.0631334	0.102711	0.0001272	0.0004398	1.05521	0.0010653	1.80934	0.115737	0.0066	0.012	0.0117	0.023	0.0234	0.013	0.0064185	0.0004103	4.10699	0.0284231	99.8425	0.75669	67.5699	0.459102	0.459105	3.39404e-19	NM-258C	0.0091559	2.1604e-07	6.33234	1.00066	0.000653	3.6e-07	0.00014	0	0.0002633	3.4e-07	0.01077	0	0.007529
61736-38	CM-Ash2	ARGUS VI (Jan)	2013-08-15	21.8167	4	84.1018	0.14016	14.7643	0.0671264	0.1135	0.0370135	0.028498	0.23052	-0.0001274	0.0006937	1.05521	0.0010653	1.79951	0.115775	0.0066	0.012	0.0117	0.023	0.0234	0.013	0.0063847	0.0004104	5.69137	0.0309736	100.045	0.34177	92.9843	0.493401	0.493406	7.38213e-19	NM-258C	0.0091559	2.1604e-07	6.33288	1.00066	0.000653	3.6e-07	0.00014	0	0.0002633	3.4e-07	0.01077	0	0.007529
61736-39	CM-Ash2	ARGUS VI (Jan)	2013-08-15	21.9333	4	282.396	0.159732	27.3092	0.0612287	0.3322	0.043566	0.0044334	0.172869	0.0013081	0.0006769	1.05521	0.0010653	1.7895	0.11582	0.0066	0.012	0.0117	0.023	0.0234	0.013	0.0063503	0.0004105	10.3189	0.0250043	99.8626	0.107442	165.255	0.382893	0.382911	1.36546e-18	NM-258C	0.0091559	2.1604e-07	6.33343	1.00066	0.000653	3.6e-07	0.00014	0	0.0002633	3.4e-07	0.01077	0	0.007529
61736-40	CM-Ash2	ARGUS VI (Jan)	2013-08-15	22.0833	4	49.0716	0.134883	11.5563	0.0553538	0.1092	0.0339706	0.190661	0.189816	-0.0003479	0.0006279	1.05521	0.0010653	1.77474	0.115898	0.0066	0.012	0.0117	0.023	0.0234	0.013	0.0062997	0.0004108	4.24901	0.0285673	100.241	0.546756	69.8624	0.460854	0.460857	5.77817e-19	NM-258C	0.0091559	2.1604e-07	6.33425	1.00066	0.000653	3.6e-07	0.00014	0	0.0002633	3.4e-07	0.01077	0	0.007529
61736-41	CM-Ash2	ARGUS VI (Jan)	2013-08-15	22.1833	4	99.7638	0.136492	22.3853	0.0681112	0.2009	0.0410488	0.145067	0.224684	-0.00048	0.0006523	1.05521	0.0010653	1.76491	0.115958	0.0066	0.012	0.0117	0.023	0.0234	0.013	0.0062659	0.000411	4.45597	0.0172572	100.153	0.275852	73.1982	0.27789	0.277896	1.11926e-18	NM-258C	0.0091559	2.1604e-07	6.33479	1.00066	0.000653	3.6e-07	0.00014	0	0.0002633	3.4e-07	0.01077	0	0.007529
61736-43	CM-Ash2	ARGUS VI (Jan)	2013-08-15	22.4	4	85.5318	0.148129	18.5534	0.0750162	0.2176	0.0418808	0.309191	0.207155	0.0018284	0.0006775	1.05521	0.0010653	1.74522	0.116096	0.0066	0.012	0.0117	0.023	0.0234	0.013	0.0061983	0.0004115	4.57455	0.0229431	99.3913	0.340802	75.1065	0.369065	0.369069	9.27668e-19	NM-258C	0.0091559	2.1604e-07	6.33588	1.00066	0.000653	3.6e-07	0.00014	0	0.0002633	3.4e-07	0.01077	0	0.007529
61736-44	CM-Ash2	ARGUS VI (Jan)	2013-08-15	22.7333	4	229.381	0.15278	15.4892	0.0622102	0.1823	0.0378021	-0.0589397	0.189917	0.0010614	0.0006211	1.05521	0.0010653	1.714	0.116365	0.0066	0.012	0.0117	0.023	0.0234	0.013	0.0060911	0.0004125	14.7808	0.0613949	99.8603	0.124238	232.335	0.906315	0.90633	7.74462e-19	NM-258C	0.0091559	2.1604e-07	6.33761	1.00066	0.000653	3.6e-07	0.00014	0	0.0002633	3.4e-07	0.01077	0	0.007529
61736-46	CM-Ash2	ARGUS VI (Jan)	2013-08-15	23.35	4	49.9554	0.134372	10.8988	0.0592676	0.0486	0.0347131	0.216224	0.195748	0.0001367	0.0006712	1.05521	0.0010653	1.65467	0.117046	0.0066	0.012	0.0117	0.023	0.0234	0.013	0.0058874	0.0004149	4.57363	0.0333445	99.946	0.554056	75.0917	0.536386	0.536389	5.4494e-19	NM-258C	0.0091559	2.1604e-07	6.34089	1.00066	0.000653	3.6e-07	0.00014	0	0.0002633	3.4e-07	0.01077	0	0.007529
61736-47	CM-Ash2	ARGUS VI (Jan)	2013-08-15	23.6667	4	48.6303	0.119001	11.4907	0.0192221	0.10367	0.0248091	0.0260044	0.10364	0.0006793	0.0004535	1.05521	0.0010653	1.62463	0.117474	0.0066	0.012	0.0117	0.023	0.0234	0.013	0.0057843	0.0004164	4.2071	0.0172011	99.5853	0.444446	69.1862	0.277595	0.2776	5.74535e-19	NM-258C	0.0091559	2.1604e-07	6.34255	1.00066	0.000653	3.6e-07	0.00014	0	0.0002633	3.4e-07	0.01077	0	0.007529
61736-48	CM-Ash2	ARGUS VI (Jan)	2013-08-15	23.7833	4	2272.56	0.303704	20.7847	0.0710681	0.232	0.04272	0.495396	0.190081	-0.0012212	0.0008027	1.05521	0.0010653	1.61475	0.117627	0.0066	0.012	0.0117	0.023	0.0234	0.013	0.0057503	0.000417	109.352	0.374398	100.018	0.0216482	1269.91	3.13552	3.1356	1.03924e-18	NM-258C	0.0091559	2.1604e-07	6.34309	1.00066	0.000653	3.6e-07	0.00014	0	0.0002633	3.4e-07	0.01077	0	0.007529
61736-49	CM-Ash2	ARGUS VI (Jan)	2013-08-15	23.8833	4	97.4667	0.141825	18.3136	0.0641751	0.1237	0.0362353	0.197922	0.201604	0.0007349	0.0007236	1.05521	0.0010653	1.60492	0.117786	0.0066	0.012	0.0117	0.023	0.0234	0.013	0.0057166	0.0004175	5.3033	0.0233646	99.7875	0.302931	86.792	0.373453	0.373458	9.1568e-19	NM-258C	0.0091559	2.1604e-07	6.34364	1.00066	0.000653	3.6e-07	0.00014	0	0.0002633	3.4e-07	0.01077	0	0.007529
61736-51	CM-Ash2	ARGUS VI (Jan)	2013-08-16	0.516667	4	66.4917	0.120552	16.548	0.0208224	0.1631	0.0254951	0.137031	0.102194	8.44e-05	0.0004502	1.05521	0.0010653	1.54476	0.118881	0.0066	0.012	0.0117	0.023	0.0234	0.013	0.00551	0.0004214	4.00971	0.0120279	99.9772	0.327194	65.9978	0.194447	0.194453	8.27397e-19	NM-258C	0.0091559	2.1604e-07	6.34697	1.00066	0.000653	3.6e-07	0.00014	0	0.0002633	3.4e-07	0.01077	0	0.007529
61736-53	CM-Ash2	ARGUS VI (Jan)	2013-08-16	1.01667	4	864.839	0.208013	15.049	0.058288	0.1646	0.0354683	0.233028	0.207602	-7.25e-05	0.0006531	1.05521	0.0010653	1.49839	0.119873	0.0066	0.012	0.0117	0.023	0.0234	0.013	0.0053508	0.0004249	57.4641	0.223414	100.005	0.04084	773.821	2.45351	2.45355	7.52448e-19	NM-258C	0.0091559	2.1604e-07	6.34953	1.00066	0.000653	3.6e-07	0.00014	0	0.0002633	3.4e-07	0.01077	0	0.007529
61736-54	CM-Ash2	ARGUS VI (Jan)	2013-08-16	1.11667	4	257.153	0.162861	13.2077	0.0622103	0.0496	0.0394081	-0.0590557	0.207619	0.0047516	0.000763	1.05521	0.0010653	1.48855	0.120099	0.0066	0.012	0.0117	0.023	0.0234	0.013	0.005317	0.0004257	19.3544	0.0936372	99.4457	0.125906	298.636	1.33311	1.33312	6.60387e-19	NM-258C	0.0091559	2.1604e-07	6.35008	1.00066	0.000653	3.6e-07	0.00014	0	0.0002633	3.4e-07	0.01077	0	0.007529
61736-56	CM-Ash2	ARGUS VI (Jan)	2013-08-16	1.63333	4	36.2451	0.13954	7.94726	0.0573092	0.0586	0.0378021	0.1963	0.207706	0.0013562	0.0006485	1.05521	0.0010653	1.44043	0.121286	0.0066	0.012	0.0117	0.023	0.0234	0.013	0.0051517	0.0004299	4.50417	0.0443056	98.9222	0.762584	73.9741	0.713144	0.713146	3.97363e-19	NM-258C	0.0091559	2.1604e-07	6.35274	1.00066	0.000653	3.6e-07	0.00014	0	0.0002633	3.4e-07	0.01077	0	0.007529
61736-58	CM-Ash2	ARGUS VI (Jan)	2013-08-16	2.05	4	152.571	0.148417	18.2763	0.0622103	0.2228	0.0402244	0.203358	0.207778	0.000553	0.000651	1.05521	0.0010653	1.40087	0.122359	0.0066	0.012	0.0117	0.023	0.0234	0.013	0.0050159	0.0004337	8.33245	0.0313942	99.9031	0.187804	134.58	0.488866	0.488875	9.13815e-19	NM-258C	0.0091559	2.1604e-07	6.35494	1.00066	0.000653	3.6e-07	0.00014	0	0.0002633	3.4e-07	0.01077	0	0.007529
61736-59	CM-Ash2	ARGUS VI (Jan)	2013-08-16	2.15	4	27.1098	0.141708	2.53148	0.0612288	0.0675	0.0347131	-0.046395	0.190452	0.0001824	0.0006595	1.05521	0.0010653	1.39104	0.122639	0.0066	0.012	0.0117	0.023	0.0234	0.013	0.0049821	0.0004347	10.6792	0.275717	99.7927	1.03709	170.764	4.20939	4.20939	1.26574e-19	NM-258C	0.0091559	2.1604e-07	6.35548	1.00066	0.000653	3.6e-07	0.00014	0	0.0002633	3.4e-07	0.01077	0	0.007529
61736-60	CM-Ash2	ARGUS VI (Jan)	2013-08-16	2.48333	4	55.3015	0.144029	10.5671	0.0612288	0.0966	0.0354683	0.0019072	0.190504	-0.0007478	0.0006696	1.05521	0.0010653	1.35974	0.123565	0.0066	0.012	0.0117	0.023	0.0234	0.013	0.0048747	0.000438	5.24686	0.0383636	100.402	0.517661	85.8897	0.613495	0.613498	5.28355e-19	NM-258C	0.0091559	2.1604e-07	6.35721	1.00066	0.000653	3.6e-07	0.00014	0	0.0002633	3.4e-07	0.01077	0	0.007529
61736-61	CM-Ash2	ARGUS VI (Jan)	2013-08-16	2.58333	4	1355.88	0.24381	21.8377	0.0622103	0.2922	0.0410488	0.427242	0.207871	0.0006661	0.0006864	1.05521	0.0010653	1.34985	0.123868	0.0066	0.012	0.0117	0.023	0.0234	0.013	0.0048407	0.0004391	62.075	0.177465	99.988	0.0296005	823.77	1.89644	1.89651	1.09188e-18	NM-258C	0.0091559	2.1604e-07	6.35776	1.00066	0.000653	3.6e-07	0.00014	0	0.0002633	3.4e-07	0.01077	0	0.007529
61736-62	CM-Ash2	ARGUS VI (Jan)	2013-08-16	2.9	4	103.948	0.126744	24.5317	0.0208224	0.2538	0.0259422	0.144423	0.104302	0.0006526	0.0004665	1.05521	0.0010653	1.31981	0.12482	0.0066	0.012	0.0117	0.023	0.0234	0.013	0.0047376	0.0004424	4.22228	0.0084781	99.823	0.218778	69.4311	0.136803	0.136813	1.22659e-18	NM-258C	0.0091559	2.1604e-07	6.35943	1.00066	0.000653	3.6e-07	0.00014	0	0.0002633	3.4e-07	0.01077	0	0.007529
61736-63	CM-Ash2	ARGUS VI (Jan)	2013-08-16	3	4	52.0451	0.14148	11.4243	0.0631925	0.0936	0.0394081	0.346618	0.213793	0.0008528	0.0006733	1.05521	0.0010653	1.30998	0.125142	0.0066	0.012	0.0117	0.023	0.0234	0.013	0.0047038	0.0004436	4.52824	0.0330743	99.5606	0.54578	74.3615	0.532252	0.532255	5.71213e-19	NM-258C	0.0091559	2.1604e-07	6.35997	1.00066	0.000653	3.6e-07	0.00014	0	0.0002633	3.4e-07	0.01077	0	0.007529
61736-65	CM-Ash2	ARGUS VI (Jan)	2013-08-16	3.31667	4	219.069	0.158484	16.5739	0.0730415	0.1586	0.0378021	0.421771	0.184923	0.0009906	0.0006756	1.05521	0.0010653	1.28157	0.1261	0.0066	0.012	0.0117	0.023	0.0234	0.013	0.0046063	0.000447	13.1945	0.0602121	99.8799	0.137742	208.767	0.900373	0.900385	8.28694e-19	NM-258C	0.0091559	2.1604e-07	6.36155	1.00066	0.000653	3.6e-07	0.00014	0	0.0002633	3.4e-07	0.01077	0	0.007529
61736-67	CM-Ash2	ARGUS VI (Jan)	2013-08-16	4	4	84.8758	0.129868	20.0568	0.0200133	0.1915	0.0254951	0.128259	0.104397	0.0014168	0.0004857	1.05521	0.0010653	1.21577	0.12847	0.0066	0.012	0.0117	0.023	0.0234	0.013	0.0043803	0.0004554	4.20366	0.0105787	99.5122	0.275876	69.1307	0.170726	0.170734	1.00284e-18	NM-258C	0.0091559	2.1604e-07	6.3652	1.00066	0.000653	3.6e-07	0.00014	0	0.0002633	3.4e-07	0.01077	0	0.007529
61736-68	CM-Ash2	ARGUS VI (Jan)	2013-08-16	4.61667	4	6.54796	0.0380677	1.48456	0.0351689	-0.0046	0.0238537	0.0929789	0.184684	0.0005344	0.0003713	1.05521	0.0010653	1.27394	0.0149718	0.00932	0.0089	0.0069	0.013	0.0144	0.021	0.0049266	0.0001756	4.30036	0.129361	97.661	1.89146	70.6906	2.08595	2.08595	7.42282e-20	NM-258C	0.0091559	2.1604e-07	6.36842	1.00066	0.000653	3.6e-07	0.00014	0	0.0002633	3.4e-07	0.01077	0	0.007529
61736-69	CM-Ash2	ARGUS VI (Jan)	2013-08-16	4.93333	4	117.468	0.0257153	27.7777	0.0192015	0.337	0.0176918	0.150334	0.146303	0.0002162	0.0002357	1.05521	0.0010653	1.26909	0.0148417	0.00932	0.0089	0.0069	0.013	0.0144	0.021	0.0049111	0.0001745	4.2195	0.0040038	99.9566	0.0686194	69.3863	0.0646068	0.0646268	1.38888e-18	NM-258C	0.0091559	2.1604e-07	6.37009	1.00066	0.000653	3.6e-07	0.00014	0	0.0002633	3.4e-07	0.01077	0	0.007529
61736-70	CM-Ash2	ARGUS VI (Jan)	2013-08-16	5.05	4	114.153	0.0931828	25.336	0.0716031	0.3174	0.0345398	0.254188	0.222972	0.0004463	0.0005356	1.05521	0.0010653	1.2675	0.0147996	0.00932	0.0089	0.0069	0.013	0.0144	0.021	0.0049061	0.0001742	4.49368	0.0146854	99.9026	0.182406	73.8052	0.236398	0.236404	1.2668e-18	NM-258C	0.0091559	2.1604e-07	6.37064	1.00066	0.000653	3.6e-07	0.00014	0	0.0002633	3.4e-07	0.01077	0	0.007529
61736-71	CM-Ash2	ARGUS VI (Jan)	2013-08-16	5.36667	4	69.7755	0.0248048	16.4715	0.0200934	0.18426	0.0164012	-0.0058625	0.147943	0.0004289	0.0002347	1.05521	0.0010653	1.26265	0.0146723	0.00932	0.0089	0.0069	0.013	0.0144	0.021	0.0048906	0.0001732	4.22084	0.006892	99.8163	0.113824	69.4078	0.11121	0.111222	8.23575e-19	NM-258C	0.0091559	2.1604e-07	6.37231	1.00066	0.000653	3.6e-07	0.00014	0	0.0002633	3.4e-07	0.01077	0	0.007529
61736-72	CM-Ash2	ARGUS VI (Jan)	2013-08-16	5.68333	4	53.719	0.0223747	12.6771	0.0183209	0.12423	0.0161012	-0.0294478	0.146392	-2.23202e-06	0.0002339	1.05521	0.0010653	1.2578	0.0145474	0.00932	0.0089	0.0069	0.013	0.0144	0.021	0.0048751	0.0001722	4.22978	0.0084739	99.9959	0.144596	69.5521	0.136725	0.136735	6.33855e-19	NM-258C	0.0091559	2.1604e-07	6.37398	1.00066	0.000653	3.6e-07	0.00014	0	0.0002633	3.4e-07	0.01077	0	0.007529
61736-73	CM-Ash2	ARGUS VI (Jan)	2013-08-16	6	4	59.8831	0.0230662	14.1502	0.0192015	0.14966	0.01628	0.248459	0.146431	-0.0003488	0.0002332	1.05521	0.0010653	1.25293	0.014424	0.00932	0.0089	0.0069	0.013	0.0144	0.021	0.0048596	0.0001712	4.2332	0.0077891	100.206	0.130138	69.6074	0.125674	0.125684	7.07508e-19	NM-258C	0.0091559	2.1604e-07	6.37566	1.00066	0.000653	3.6e-07	0.00014	0	0.0002633	3.4e-07	0.01077	0	0.007529
61736-74	CM-Ash2	ARGUS VI (Jan)	2013-08-16	6.31667	4	50.6295	0.0237822	12.1025	0.0174532	0.12947	0.01622	0.0742321	0.146212	0.0001276	0.0002255	1.05521	0.0010653	1.24808	0.0143037	0.00932	0.0089	0.0069	0.013	0.0144	0.021	0.0048441	0.0001703	4.17321	0.0084893	99.9362	0.150617	68.6393	0.137044	0.137053	6.05126e-19	NM-258C	0.0091559	2.1604e-07	6.37733	1.00066	0.000653	3.6e-07	0.00014	0	0.0002633	3.4e-07	0.01077	0	0.007529
61736-76	CM-Ash2	ARGUS VI (Jan)	2013-08-16	6.83333	4	55.6733	0.0236683	13.2771	0.0183209	0.09798	0.0164012	0.0989545	0.148396	-0.0001519	0.0002244	1.05521	0.0010653	1.24021	0.0141133	0.00932	0.0089	0.0069	0.013	0.0144	0.021	0.004819	0.0001688	4.18952	0.0079352	100.092	0.136418	68.9024	0.12808	0.12809	6.63854e-19	NM-258C	0.0091559	2.1604e-07	6.38005	1.00066	0.000653	3.6e-07	0.00014	0	0.0002633	3.4e-07	0.01077	0	0.007529
61736-77	CM-Ash2	ARGUS VI (Jan)	2013-08-16	7.13333	4	68.1451	0.024416	16.357	0.0174532	0.1665	0.0170294	0.174857	0.151286	7.88e-05	0.0002169	1.05521	0.0010653	1.23561	0.014005	0.00932	0.0089	0.0069	0.013	0.0144	0.021	0.0048043	0.0001679	4.15798	0.0061828	99.985	0.109442	68.3933	0.0998227	0.0998352	8.17852e-19	NM-258C	0.0091559	2.1604e-07	6.38164	1.00066	0.000653	3.6e-07	0.00014	0	0.0002633	3.4e-07	0.01077	0	0.007529
61736-78	CM-Ash2	ARGUS VI (Jan)	2013-08-16	7.25	4	58.0893	0.0684406	12.6755	0.0626771	0.118	0.0299666	0.564185	0.223376	0.0003332	0.0005136	1.05521	0.0010653	1.23404	0.0139685	0.00932	0.0089	0.0069	0.013	0.0144	0.021	0.0047993	0.0001677	4.571	0.0262636	99.9037	0.31376	75.0495	0.422491	0.422495	6.33774e-19	NM-258C	0.0091559	2.1604e-07	6.38218	1.00066	0.000653	3.6e-07	0.00014	0	0.0002633	3.4e-07	0.01077	0	0.007529
61736-79	CM-Ash2	ARGUS VI (Jan)	2013-08-16	7.55	4	33.6898	0.0743045	6.93488	0.0557524	0.074	0.0317805	0.483891	0.218359	-0.0003982	0.0005133	1.05521	0.0010653	1.22938	0.0138619	0.00932	0.0089	0.0069	0.013	0.0144	0.021	0.0047844	0.0001668	4.8733	0.0463492	100.466	0.55453	79.906	0.743625	0.743628	3.46744e-19	NM-258C	0.0091559	2.1604e-07	6.38379	1.00066	0.000653	3.6e-07	0.00014	0	0.0002633	3.4e-07	0.01077	0	0.007529
61736-80	CM-Ash2	ARGUS VI (Jan)	2013-08-16	7.85	4	58.1102	0.0226564	13.6615	0.0192015	0.10692	0.0161604	0.0913109	0.151375	-0.0002076	0.0002295	1.05521	0.0010653	1.22478	0.0137591	0.00932	0.0089	0.0069	0.013	0.0144	0.021	0.0047697	0.0001661	4.251	0.0080317	100.116	0.13204	69.8945	0.129568	0.129578	6.83072e-19	NM-258C	0.0091559	2.1604e-07	6.38538	1.00066	0.000653	3.6e-07	0.00014	0	0.0002633	3.4e-07	0.01077	0	0.007529
61736-81	CM-Ash2	ARGUS VI (Jan)	2013-08-16	7.95	4	46.2296	0.0762454	9.91276	0.0606968	0.0381	0.0290689	0.348671	0.244423	0.0012159	0.0004831	1.05521	0.0010653	1.2232	0.0137243	0.00932	0.0089	0.0069	0.013	0.0144	0.021	0.0047647	0.0001658	4.62211	0.0328335	99.2673	0.391502	75.8715	0.527942	0.527945	4.95638e-19	NM-258C	0.0091559	2.1604e-07	6.38592	1.00066	0.000653	3.6e-07	0.00014	0	0.0002633	3.4e-07	0.01077	0	0.007529
61736-82	CM-Ash2	ARGUS VI (Jan)	2013-08-16	8.06667	4	76.9113	0.0762392	17.9872	0.0587178	0.1456	0.0373363	0.180737	0.23913	0.0012033	0.0005129	1.05521	0.0010653	1.22162	0.0136898	0.00932	0.0089	0.0069	0.013	0.0144	0.021	0.0047597	0.0001655	4.24911	0.0168682	99.5485	0.244804	69.8641	0.272121	0.272126	8.99361e-19	NM-258C	0.0091559	2.1604e-07	6.38647	1.00066	0.000653	3.6e-07	0.00014	0	0.0002633	3.4e-07	0.01077	0	0.007529
61736-83	CM-Ash2	ARGUS VI (Jan)	2013-08-16	8.36667	4	48.9494	0.0233605	12.2844	0.0183209	0.1462	0.0170294	0.137663	0.148583	-0.0003028	0.0002214	1.05521	0.0010653	1.21701	0.0135909	0.00932	0.0089	0.0069	0.013	0.0144	0.021	0.004745	0.0001648	3.98544	0.0083036	100.208	0.153157	65.6056	0.134267	0.134276	6.14221e-19	NM-258C	0.0091559	2.1604e-07	6.38806	1.00066	0.000653	3.6e-07	0.00014	0	0.0002633	3.4e-07	0.01077	0	0.007529
61736-84	CM-Ash2	ARGUS VI (Jan)	2013-08-16	8.68333	4	26.0454	0.0683442	5.68385	0.0567405	0.0042	0.0317805	-0.453034	0.218563	7.57e-05	0.0005626	1.05521	0.0010653	1.21209	0.013488	0.00932	0.0089	0.0069	0.013	0.0144	0.021	0.0047293	0.000164	4.5639	0.0557441	99.7664	0.747033	74.9352	0.896789	0.896791	2.84193e-19	NM-258C	0.0091559	2.1604e-07	6.38976	1.00066	0.000653	3.6e-07	0.00014	0	0.0002633	3.4e-07	0.01077	0	0.007529
61736-85	CM-Ash2	ARGUS VI (Jan)	2013-08-16	8.8	4	44.7575	0.074229	10.5261	0.0518051	0.0948	0.0272947	-0.0600696	0.234014	-5.44e-05	0.0004137	1.05521	0.0010653	1.21031	0.0134514	0.00932	0.0089	0.0069	0.013	0.0144	0.021	0.0047236	0.0001638	4.24553	0.0250696	100.024	0.364861	69.8062	0.404441	0.404444	5.26304e-19	NM-258C	0.0091559	2.1604e-07	6.39038	1.00066	0.000653	3.6e-07	0.00014	0	0.0002633	3.4e-07	0.01077	0	0.007529
61736-86	CM-Ash2	ARGUS VI (Jan)	2013-08-16	9.1	4	44.2737	0.0702811	9.46617	0.0616868	0.0671	0.0272947	0.251205	0.244655	0.0004867	0.0005221	1.05521	0.0010653	1.20567	0.013358	0.00932	0.0089	0.0069	0.013	0.0144	0.021	0.0047087	0.0001631	4.65619	0.0354072	99.7128	0.419837	76.4194	0.569155	0.569157	4.73308e-19	NM-258C	0.0091559	2.1604e-07	6.39198	1.00066	0.000653	3.6e-07	0.00014	0	0.0002633	3.4e-07	0.01077	0	0.007529
61736-87	CM-Ash2	ARGUS VI (Jan)	2013-08-16	9.21667	4	82.2904	0.0683125	19.2129	0.0676334	0.1215	0.0326956	0.570214	0.239357	0.0003485	0.0005623	1.05521	0.0010653	1.20408	0.0133267	0.00932	0.0089	0.0069	0.013	0.0144	0.021	0.0047037	0.0001628	4.27234	0.0178001	99.9232	0.236682	70.2388	0.287096	0.2871	9.60647e-19	NM-258C	0.0091559	2.1604e-07	6.39253	1.00066	0.000653	3.6e-07	0.00014	0	0.0002633	3.4e-07	0.01077	0	0.007529
61736-88	CM-Ash2	ARGUS VI (Jan)	2013-08-16	9.31667	4	46.0942	0.0517375	10.8083	0.0597071	0.1127	0.0317805	0.0281296	0.239378	1.52e-05	0.0005019	1.05521	0.0010653	1.20248	0.0132954	0.00932	0.0089	0.0069	0.013	0.0144	0.021	0.0046986	0.0001626	4.25697	0.0278006	99.9946	0.364292	69.9908	0.448455	0.448458	5.40413e-19	NM-258C	0.0091559	2.1604e-07	6.39309	1.00066	0.000653	3.6e-07	0.00014	0	0.0002633	3.4e-07	0.01077	0	0.007529
61736-89	CM-Ash2	ARGUS VI (Jan)	2013-08-16	9.41667	4	99.5464	0.082079	23.1633	0.0547649	0.3026	0.0382753	0.35101	0.20875	0.0005397	0.0005219	1.05521	0.0010653	1.2009	0.0132649	0.00932	0.0089	0.0069	0.013	0.0144	0.021	0.0046935	0.0001624	4.28446	0.0126979	99.8683	0.196108	70.4343	0.204782	0.204789	1.15816e-18	NM-258C	0.0091559	2.1604e-07	6.39363	1.00066	0.000653	3.6e-07	0.00014	0	0.0002633	3.4e-07	0.01077	0	0.007529
61736-90	CM-Ash2	ARGUS VI (Jan)	2013-08-16	9.73333	4	119.221	0.0830518	26.3025	0.0567405	0.2854	0.0382753	0.0684292	0.213739	0.0009522	0.0005519	1.05521	0.0010653	1.19621	0.013176	0.00932	0.0089	0.0069	0.013	0.0144	0.021	0.0046786	0.0001618	4.51459	0.0120313	99.7662	0.170482	74.1418	0.193639	0.193646	1.31512e-18	NM-258C	0.0091559	2.1604e-07	6.39525	1.00066	0.000653	3.6e-07	0.00014	0	0.0002633	3.4e-07	0.01077	0	0.007529
61736-91	CM-Ash2	ARGUS VI (Jan)	2013-08-16	10.0333	4	51.6668	0.0230736	12.4499	0.0192016	0.11888	0.0161604	0.0458654	0.148241	-9.17e-05	0.0002259	1.05521	0.0010653	1.19161	0.0130916	0.00932	0.0089	0.0069	0.013	0.0144	0.021	0.0046639	0.0001612	4.14487	0.0086429	100.059	0.147059	68.1816	0.139558	0.139567	6.22497e-19	NM-258C	0.0091559	2.1604e-07	6.39685	1.00066	0.000653	3.6e-07	0.00014	0	0.0002633	3.4e-07	0.01077	0	0.007529
61736-92	CM-Ash2	ARGUS VI (Jan)	2013-08-16	10.35	4	85.5677	0.0711977	18.5295	0.0606968	0.182	0.0373363	-0.0614261	0.223949	-0.0004972	0.0005414	1.05521	0.0010653	1.18668	0.0130043	0.00932	0.0089	0.0069	0.013	0.0144	0.021	0.0046482	0.0001605	4.61807	0.0179235	100.167	0.223757	75.8066	0.288209	0.288215	9.26474e-19	NM-258C	0.0091559	2.1604e-07	6.39855	1.00066	0.000653	3.6e-07	0.00014	0	0.0002633	3.4e-07	0.01077	0	0.007529
61736-93	CM-Ash2	ARGUS VI (Jan)	2013-08-16	10.4667	4	29.9479	0.0653024	6.91457	0.0616868	0.0732	0.0354683	0.199652	0.26119	0.0001455	0.0004713	1.05521	0.0010653	1.1851	0.012977	0.00932	0.0089	0.0069	0.013	0.0144	0.021	0.0046431	0.0001603	4.31967	0.0447445	99.9072	0.566458	71.0019	0.72138	0.721382	3.45729e-19	NM-258C	0.0091559	2.1604e-07	6.3991	1.00066	0.000653	3.6e-07	0.00014	0	0.0002633	3.4e-07	0.01077	0	0.007529
61736-94	CM-Ash2	ARGUS VI (Jan)	2013-08-16	10.7833	4	73.7734	0.0229628	17.7537	0.0183209	0.178	0.0170294	0.24579	0.148604	0.0001407	0.000225	1.05521	0.0010653	1.18026	0.0128954	0.00932	0.0089	0.0069	0.013	0.0144	0.021	0.0046277	0.0001598	4.14659	0.0059021	99.9684	0.10271	68.2094	0.0952994	0.0953125	8.87684e-19	NM-258C	0.0091559	2.1604e-07	6.40078	1.00066	0.000653	3.6e-07	0.00014	0	0.0002633	3.4e-07	0.01077	0	0.007529
61736-95	CM-Ash2	ARGUS VI (Jan)	2013-08-16	10.8833	4	434.908	0.130635	12.5094	0.057729	0.1508	0.0326956	0.273977	0.234414	-0.0002381	0.0005411	1.05521	0.0010653	1.17868	0.0128695	0.00932	0.0089	0.0069	0.013	0.0144	0.021	0.0046226	0.0001596	34.767	0.16135	100.021	0.0565702	505.877	2.05125	2.05127	6.25469e-19	NM-258C	0.0091559	2.1604e-07	6.40132	1.00066	0.000653	3.6e-07	0.00014	0	0.0002633	3.4e-07	0.01077	0	0.007529
61736-96	CM-Ash2	ARGUS VI (Jan)	2013-08-16	11.2	4	996.212	0.19043	20.8932	0.0626772	0.2362	0.0392173	0.411071	0.239749	-0.0006241	0.0005612	1.05521	0.0010653	1.17391	0.0127933	0.00932	0.0089	0.0069	0.013	0.0144	0.021	0.0046074	0.0001591	47.6848	0.143594	100.022	0.0318936	663.147	1.67522	1.67527	1.04466e-18	NM-258C	0.0091559	2.1604e-07	6.40298	1.00066	0.000653	3.6e-07	0.00014	0	0.0002633	3.4e-07	0.01077	0	0.007529
61736-97	CM-Ash2	ARGUS VI (Jan)	2013-08-16	11.4	4	36.4156	0.0325949	8.51454	0.0274994	0.0838	0.019105	0.238872	0.169072	0.0002624	0.0002641	1.05521	0.0010653	1.17076	0.0127448	0.00932	0.0089	0.0069	0.013	0.0144	0.021	0.0045973	0.0001588	4.2624	0.017118	99.8354	0.25366	70.0784	0.27612	0.276125	4.25727e-19	NM-258C	0.0091559	2.1604e-07	6.40407	1.00066	0.000653	3.6e-07	0.00014	0	0.0002633	3.4e-07	0.01077	0	0.007529
61736-98	CM-Ash2	ARGUS VI (Jan)	2013-08-16	11.5	4	182.758	0.0760712	7.37568	0.0606968	0.0366	0.0317805	0.251061	0.234535	0.000674	0.0005107	1.05521	0.0010653	1.16918	0.0127209	0.00932	0.0089	0.0069	0.013	0.0144	0.021	0.0045923	0.0001586	24.7466	0.205043	99.8998	0.1025	373.838	2.80168	2.8017	3.68784e-19	NM-258C	0.0091559	2.1604e-07	6.40462	1.00066	0.000653	3.6e-07	0.00014	0	0.0002633	3.4e-07	0.01077	0	0.007529
61736-99	CM-Ash2	ARGUS VI (Jan)	2013-08-16	11.8333	4	42.3368	0.0220006	10.0283	0.0166005	0.11324	0.01622	-0.082449	0.147923	-0.0002299	0.0002165	1.05521	0.0010653	1.16433	0.0126501	0.00932	0.0089	0.0069	0.013	0.0144	0.021	0.0045768	0.0001581	4.22037	0.0098324	100.147	0.171891	69.4003	0.158659	0.158667	5.01418e-19	NM-258C	0.0091559	2.1604e-07	6.4063	1.00066	0.000653	3.6e-07	0.00014	0	0.0002633	3.4e-07	0.01077	0	0.007529
61736-100	CM-Ash2	ARGUS VI (Jan)	2013-08-16	12.15	4	127.268	0.0829594	28.2367	0.0587179	0.3348	0.0420595	0.623503	0.219189	0.0042654	0.0005811	1.05521	0.0010653	1.15929	0.0125801	0.00932	0.0089	0.0069	0.013	0.0144	0.021	0.0045607	0.0001577	4.45649	0.0115284	99.0392	0.165122	73.2065	0.18564	0.185647	1.41183e-18	NM-258C	0.0091559	2.1604e-07	6.40804	1.00066	0.000653	3.6e-07	0.00014	0	0.0002633	3.4e-07	0.01077	0	0.007529
61736-101	CM-Ash2	ARGUS VI (Jan)	2013-08-16	12.4667	4	120.442	0.0750512	26.5606	0.0735895	0.2892	0.0430116	0.0692248	0.234721	0.0001578	0.0004902	1.05521	0.0010653	1.15451	0.0125172	0.00932	0.0089	0.0069	0.013	0.0144	0.021	0.0045455	0.0001573	4.5255	0.0140211	99.9655	0.151143	74.3174	0.225641	0.225648	1.32803e-18	NM-258C	0.0091559	2.1604e-07	6.4097	1.00066	0.000653	3.6e-07	0.00014	0	0.0002633	3.4e-07	0.01077	0	0.007529
61736-102	CM-Ash2	ARGUS VI (Jan)	2013-08-16	12.5833	4	310.09	0.120649	14.0238	0.0716033	0.1151	0.0326956	-0.282692	0.21424	0.0007128	0.0004902	1.05521	0.0010653	1.15293	0.0124971	0.00932	0.0089	0.0069	0.013	0.0144	0.021	0.0045405	0.0001572	22.087	0.113628	99.9238	0.0726655	337.132	1.58404	1.58406	7.0119e-19	NM-258C	0.0091559	2.1604e-07	6.41025	1.00067	0.000653	3.6e-07	0.00014	0	0.0002633	3.4e-07	0.01077	0	0.007529
61736-103	CM-Ash2	ARGUS VI (Jan)	2013-08-16	12.6833	4	275.923	0.110705	15.0917	0.0706105	0.1068	0.0308707	0.0968031	0.20931	0.0005831	0.0005911	1.05521	0.0010653	1.15134	0.0124773	0.00932	0.0089	0.0069	0.013	0.0144	0.021	0.0045354	0.000157	18.2644	0.0866065	99.9388	0.0856634	283.051	1.24355	1.24357	7.54586e-19	NM-258C	0.0091559	2.1604e-07	6.4108	1.00067	0.000653	3.6e-07	0.00014	0	0.0002633	3.4e-07	0.01077	0	0.007529
61736-104	CM-Ash2	ARGUS VI (Jan)	2013-08-16	12.7833	4	51.9444	0.0839298	11.3281	0.0508197	0.1243	0.0317805	0.123098	0.240062	0.0019961	0.0005707	1.05521	0.0010653	1.14976	0.0124581	0.00932	0.0089	0.0069	0.013	0.0144	0.021	0.0045303	0.0001569	4.5263	0.0264041	98.8718	0.400937	74.3302	0.424919	0.424923	5.66406e-19	NM-258C	0.0091559	2.1604e-07	6.41135	1.00067	0.000653	3.6e-07	0.00014	0	0.0002633	3.4e-07	0.01077	0	0.007529
61736-105	CM-Ash2	ARGUS VI (Jan)	2013-08-16	12.8833	4	42.7531	0.0651976	9.21541	0.0606969	0.0871	0.0264197	0.545653	0.209346	0.0004218	0.0004404	1.05521	0.0010653	1.14817	0.0124391	0.00932	0.0089	0.0069	0.013	0.0144	0.021	0.0045253	0.0001568	4.6229	0.0344504	99.8045	0.377715	75.8842	0.553937	0.55394	4.60771e-19	NM-258C	0.0091559	2.1604e-07	6.4119	1.00067	0.000653	3.6e-07	0.00014	0	0.0002633	3.4e-07	0.01077	0	0.007529
61736-106	CM-Ash2	ARGUS VI (Jan)	2013-08-16	13.2333	4	76.6347	0.0809522	17.6952	0.0716033	0.1181	0.0345398	0.212293	0.234867	0.000512	0.0005503	1.05521	0.0010653	1.14301	0.0123799	0.00932	0.0089	0.0069	0.013	0.0144	0.021	0.0045088	0.0001565	4.31546	0.0203505	99.8179	0.262602	70.9342	0.328106	0.32811	8.84758e-19	NM-258C	0.0091559	2.1604e-07	6.41369	1.00067	0.000653	3.6e-07	0.00014	0	0.0002633	3.4e-07	0.01077	0	0.007529
61736-107	CM-Ash2	ARGUS VI (Jan)	2013-08-16	13.3333	4	72.2189	0.0819379	15.8808	0.0706105	0.1601	0.0290689	0.260419	0.219401	0.001024	0.00051	1.05521	0.0010653	1.14138	0.0123621	0.00932	0.0089	0.0069	0.013	0.0144	0.021	0.0045036	0.0001564	4.52214	0.0229187	99.6044	0.266068	74.2633	0.368842	0.368846	7.94038e-19	NM-258C	0.0091559	2.1604e-07	6.41426	1.00067	0.000653	3.6e-07	0.00014	0	0.0002633	3.4e-07	0.01077	0	0.007529
61736-108	CM-Ash2	ARGUS VI (Jan)	2013-08-16	13.8833	4	49.8904	0.0209702	11.8082	0.0183209	0.12291	0.0161012	0.0567275	0.147908	6.84e-05	0.0002148	1.05521	0.0010653	1.13309	0.0122781	0.00932	0.0089	0.0069	0.013	0.0144	0.021	0.0044771	0.0001559	4.21617	0.008752	99.9676	0.143798	69.3325	0.14123	0.141239	5.90412e-19	NM-258C	0.0091559	2.1604e-07	6.41713	1.00067	0.000653	3.6e-07	0.00014	0	0.0002633	3.4e-07	0.01077	0	0.007529
61736-109	CM-Ash2	ARGUS VI (Jan)	2013-08-16	14.2	4	58.4766	0.0225981	13.8934	0.0183209	0.12997	0.0161604	0.169007	0.148212	0.0005005	0.0002147	1.05521	0.0010653	1.12825	0.0122341	0.00932	0.0089	0.0069	0.013	0.0144	0.021	0.0044617	0.0001557	4.1916	0.0074381	99.7656	0.124351	68.9361	0.120054	0.120065	6.94671e-19	NM-258C	0.0091559	2.1604e-07	6.41881	1.00067	0.000653	3.6e-07	0.00014	0	0.0002633	3.4e-07	0.01077	0	0.007529
61736-110	CM-Ash2	ARGUS VI (Jan)	2013-08-16	14.3	4	352.462	0.110677	9.32899	0.0567406	0.037	0.0336155	0.0783162	0.219576	0.0003117	0.0004897	1.05521	0.0010653	1.12667	0.0122205	0.00932	0.0089	0.0069	0.013	0.0144	0.021	0.0044566	0.0001556	37.7645	0.230591	99.9746	0.0609279	543.593	2.87172	2.87174	4.66449e-19	NM-258C	0.0091559	2.1604e-07	6.41936	1.00067	0.000653	3.6e-07	0.00014	0	0.0002633	3.4e-07	0.01077	0	0.007529
61736-111	CM-Ash2	ARGUS VI (Jan)	2013-08-16	14.4833	4	49.4155	0.0437354	11.6087	0.0361379	0.1225	0.0230217	0.250392	0.195266	-0.0002331	0.0002972	1.05521	0.0010653	1.12393	0.0121979	0.00932	0.0089	0.0069	0.013	0.0144	0.021	0.0044479	0.0001555	4.25696	0.0158309	100.18	0.221407	69.9906	0.255371	0.255376	5.80436e-19	NM-258C	0.0091559	2.1604e-07	6.42032	1.00067	0.000653	3.6e-07	0.00014	0	0.0002633	3.4e-07	0.01077	0	0.007529
61736-112	CM-Ash2	ARGUS VI (Jan)	2013-08-16	14.8	4	98.2903	0.0759796	21.6716	0.069618	0.2218	0.0364005	0.31275	0.214632	0.0001502	0.0004996	1.05521	0.0010653	1.11915	0.0121615	0.00932	0.0089	0.0069	0.013	0.0144	0.021	0.0044326	0.0001553	4.527	0.016506	99.9788	0.188054	74.3414	0.265628	0.265633	1.08358e-18	NM-258C	0.0091559	2.1604e-07	6.42198	1.00067	0.000653	3.6e-07	0.00014	0	0.0002633	3.4e-07	0.01077	0	0.007529
61736-113	CM-Ash2	ARGUS VI (Jan)	2013-08-16	14.9	4	57.197	0.0651431	12.5062	0.0666417	0.107	0.0317805	0.177904	0.25666	0.001445	0.000611	1.05521	0.0010653	1.11756	0.0121502	0.00932	0.0089	0.0069	0.013	0.0144	0.021	0.0044276	0.0001553	4.53259	0.0287648	99.2681	0.35892	74.4314	0.462884	0.462887	6.2531e-19	NM-258C	0.0091559	2.1604e-07	6.42253	1.00067	0.000653	3.6e-07	0.00014	0	0.0002633	3.4e-07	0.01077	0	0.007529
61736-116	CM-Ash2	ARGUS VI (Jan)	2013-08-16	15.7667	4	46.1248	0.0730052	10.059	0.0636679	0.1714	0.0308707	0.246157	0.251396	0.0021907	0.0005297	1.05521	0.0010653	1.10449	0.0120733	0.00932	0.0089	0.0069	0.013	0.0144	0.021	0.0043859	0.000155	4.51529	0.0335098	98.6305	0.411106	74.153	0.539323	0.539326	5.02949e-19	NM-258C	0.0091559	2.1604e-07	6.42707	1.00067	0.000653	3.6e-07	0.00014	0	0.0002633	3.4e-07	0.01077	0	0.007529
61736-117	CM-Ash2	ARGUS VI (Jan)	2013-08-16	15.8667	4	1027.58	0.170428	8.4446	0.0676336	0.0681	0.0308707	-0.0302098	0.240671	-0.0005358	0.0004895	1.05521	0.0010653	1.10291	0.0120659	0.00932	0.0089	0.0069	0.013	0.0144	0.021	0.0043808	0.000155	121.695	0.975101	100.015	0.0274832	1370.47	7.72979	7.72982	4.2223e-19	NM-258C	0.0091559	2.1604e-07	6.42762	1.00067	0.000653	3.6e-07	0.00014	0	0.0002633	3.4e-07	0.01077	0	0.007529
61736-118	CM-Ash2	ARGUS VI (Jan)	2013-08-16	15.9667	4	40.2634	0.0524063	8.80054	0.058718	0.0296	0.0326956	0.192202	0.214839	0.0001986	0.0005297	1.05521	0.0010653	1.10132	0.0120589	0.00932	0.0089	0.0069	0.013	0.0144	0.021	0.0043758	0.000155	4.56228	0.0359322	99.8828	0.435889	74.9093	0.578071	0.578074	4.40027e-19	NM-258C	0.0091559	2.1604e-07	6.42817	1.00067	0.000653	3.6e-07	0.00014	0	0.0002633	3.4e-07	0.01077	0	0.007529
61736-119	CM-Ash2	ARGUS VI (Jan)	2013-08-16	16.0667	4	41.4399	0.0690598	9.06142	0.058718	0.1207	0.0317805	-0.220505	0.230181	0.0003369	0.0005398	1.05521	0.0010653	1.09973	0.0120523	0.00932	0.0089	0.0069	0.013	0.0144	0.021	0.0043707	0.000155	4.55275	0.0353694	99.7181	0.456873	74.7558	0.569064	0.569067	4.53071e-19	NM-258C	0.0091559	2.1604e-07	6.42873	1.00067	0.000653	3.6e-07	0.00014	0	0.0002633	3.4e-07	0.01077	0	0.007529
61736-120	CM-Ash2	ARGUS VI (Jan)	2013-08-16	16.1833	4	1649.04	0.240302	16.0252	0.0815418	0.1601	0.0345398	0.539416	0.240733	0.0014798	0.0005804	1.05521	0.0010653	1.09815	0.0120462	0.00932	0.0089	0.0069	0.013	0.0144	0.021	0.0043656	0.000155	102.873	0.523837	99.9758	0.0231541	1214.83	4.52106	4.52111	8.01257e-19	NM-258C	0.0091559	2.1604e-07	6.42928	1.00067	0.000653	3.6e-07	0.00014	0	0.0002633	3.4e-07	0.01077	0	0.007529
61736-121	CM-Ash2	ARGUS VI (Jan)	2013-08-16	16.2833	4	1287.17	0.220329	11.5444	0.0656502	0.1241	0.0317805	0.212827	0.23022	-8.08e-05	0.0005702	1.05521	0.0010653	1.09656	0.0120405	0.00932	0.0089	0.0069	0.013	0.0144	0.021	0.0043606	0.000155	111.495	0.634567	100.003	0.0276128	1287.78	5.26278	5.26283	5.77219e-19	NM-258C	0.0091559	2.1604e-07	6.42983	1.00067	0.000653	3.6e-07	0.00014	0	0.0002633	3.4e-07	0.01077	0	0.007529
61736-122	CM-Ash2	ARGUS VI (Jan)	2013-08-16	16.3833	4	367.007	0.130556	8.84497	0.0577291	0.1102	0.0308707	-0.244355	0.235479	0.0007234	0.0005096	1.05521	0.0010653	1.09497	0.0120352	0.00932	0.0089	0.0069	0.013	0.0144	0.021	0.0043555	0.000155	41.4586	0.271598	99.9362	0.0653375	589.029	3.29949	3.29951	4.42249e-19	NM-258C	0.0091559	2.1604e-07	6.43038	1.00067	0.000653	3.6e-07	0.00014	0	0.0002633	3.4e-07	0.01077	0	0.007529
61736-123	CM-Ash2	ARGUS VI (Jan)	2013-08-16	16.9167	4	55.7296	0.0233315	13.1385	0.0174532	0.14043	0.0161604	0.202581	0.147752	0.0001774	0.0002216	1.05521	0.0010653	1.08693	0.012015	0.00932	0.0089	0.0069	0.013	0.0144	0.021	0.0043298	0.000155	4.23138	0.007812	99.9334	0.13456	69.578	0.126045	0.126056	6.56926e-19	NM-258C	0.0091559	2.1604e-07	6.43318	1.00067	0.000653	3.6e-07	0.00014	0	0.0002633	3.4e-07	0.01077	0	0.007529
61736-124	CM-Ash2	ARGUS VI (Jan)	2013-08-16	17.4667	4	37.1558	0.0208119	8.94494	0.0166005	0.06838	0.0158685	0.221852	0.149424	0.0003574	0.0002143	1.05521	0.0010653	1.07861	0.0120056	0.00932	0.0089	0.0069	0.013	0.0144	0.021	0.0043033	0.0001552	4.13626	0.0108375	99.7563	0.192363	68.0427	0.175007	0.175014	4.47247e-19	NM-258C	0.0091559	2.1604e-07	6.43608	1.00067	0.000653	3.6e-07	0.00014	0	0.0002633	3.4e-07	0.01077	0	0.007529
61736-125	CM-Ash2	ARGUS VI (Jan)	2013-08-16	17.8333	4	69.0761	0.0224754	16.3576	0.0174533	0.16896	0.01622	0.244194	0.148656	0.000239	0.0002144	1.05521	0.0010653	1.07303	0.012006	0.00932	0.0089	0.0069	0.013	0.0144	0.021	0.0042855	0.0001553	4.21218	0.0061667	99.924	0.105176	69.2683	0.0995148	0.0995277	8.17879e-19	NM-258C	0.0091559	2.1604e-07	6.43802	1.00067	0.000653	3.6e-07	0.00014	0	0.0002633	3.4e-07	0.01077	0	0.007529
61736-126	CM-Ash2	ARGUS VI (Jan)	2013-08-16	18.15	4	206.281	0.0868346	15.82	0.0567407	0.1094	0.0345398	0.431459	0.225389	0.0001316	0.0004897	1.05521	0.0010653	1.06826	0.0120105	0.00932	0.0089	0.0069	0.013	0.0144	0.021	0.0042702	0.0001555	13.0314	0.0480011	99.996	0.092946	206.326	0.718736	0.71875	7.91001e-19	NM-258C	0.0091559	2.1604e-07	6.43968	1.00067	0.000653	3.6e-07	0.00014	0	0.0002633	3.4e-07	0.01077	0	0.007529
61736-127	CM-Ash2	ARGUS VI (Jan)	2013-08-16	18.3167	4	102.11	0.0553204	23.9384	0.0419828	0.2563	0.028178	0.409622	0.186777	0.000361	0.0003623	1.05521	0.0010653	1.06565	0.0120146	0.00932	0.0089	0.0069	0.013	0.0144	0.021	0.0042619	0.0001556	4.25488	0.0090574	99.9259	0.131818	69.9571	0.146109	0.146118	1.19692e-18	NM-258C	0.0091559	2.1604e-07	6.44059	1.00067	0.000653	3.6e-07	0.00014	0	0.0002633	3.4e-07	0.01077	0	0.007529
61736-128	CM-Ash2	ARGUS VI (Jan)	2013-08-16	18.6333	4	66.0624	0.0216473	15.7509	0.0192016	0.17462	0.01622	0.0966342	0.148754	0.0002739	0.0002222	1.05521	0.0010653	1.0608	0.0120252	0.00932	0.0089	0.0069	0.013	0.0144	0.021	0.0042465	0.0001558	4.18201	0.0068043	99.8881	0.112307	68.7812	0.109833	0.109844	7.87544e-19	NM-258C	0.0091559	2.1604e-07	6.44228	1.00067	0.000653	3.6e-07	0.00014	0	0.0002633	3.4e-07	0.01077	0	0.007529
61736-129	CM-Ash2	ARGUS VI (Jan)	2013-08-16	18.7333	4	52.7916	0.0700408	11.683	0.0686257	0.121	0.0290689	0.41363	0.21533	0.0003531	0.0004798	1.05521	0.0010653	1.05922	0.0120296	0.00932	0.0089	0.0069	0.013	0.0144	0.021	0.0042414	0.0001559	4.50501	0.0298471	99.8615	0.331619	73.9875	0.480417	0.48042	5.84148e-19	NM-258C	0.0091559	2.1604e-07	6.44283	1.00067	0.000653	3.6e-07	0.00014	0	0.0002633	3.4e-07	0.01077	0	0.007529
61736-130	CM-Ash2	ARGUS VI (Jan)	2013-08-16	18.8333	4	41.0881	0.0769469	8.86259	0.0775644	0.0723	0.0345398	0.24356	0.230706	0.0005209	0.0004401	1.05521	0.0010653	1.05763	0.0120344	0.00932	0.0089	0.0069	0.013	0.0144	0.021	0.0042363	0.000156	4.6132	0.0439867	99.6655	0.417605	75.7282	0.707333	0.707335	4.4313e-19	NM-258C	0.0091559	2.1604e-07	6.44339	1.00067	0.000653	3.6e-07	0.00014	0	0.0002633	3.4e-07	0.01077	0	0.007529
61736-132	CM-Ash2	ARGUS VI (Jan)	2013-08-16	19.5	4	56.5835	0.0779409	12.4754	0.0488507	0.0857	0.0326956	0.324276	0.225639	-0.0006529	0.0005302	1.05521	0.0010653	1.04773	0.0120739	0.00932	0.0089	0.0069	0.013	0.0144	0.021	0.0042047	0.0001566	4.54561	0.0227953	100.385	0.342773	74.6409	0.366781	0.366785	6.2377e-19	NM-258C	0.0091559	2.1604e-07	6.44684	1.00067	0.000653	3.6e-07	0.00014	0	0.0002633	3.4e-07	0.01077	0	0.007529
61736-133	CM-Ash2	ARGUS VI (Jan)	2013-08-16	19.8167	4	119.911	0.0251076	28.2912	0.0192016	0.3164	0.0176918	0.0566181	0.147844	0.000272	0.0002156	1.05521	0.0010653	1.04288	0.0120993	0.00932	0.0089	0.0069	0.013	0.0144	0.021	0.0041893	0.000157	4.22826	0.0038012	99.9364	0.0625911	69.5277	0.0613333	0.0613544	1.41456e-18	NM-258C	0.0091559	2.1604e-07	6.44853	1.00067	0.000653	3.6e-07	0.00014	0	0.0002633	3.4e-07	0.01077	0	0.007529
61736-134	CM-Ash2	ARGUS VI (Jan)	2013-08-16	20.2333	4	25.4334	0.0314383	5.94375	0.0246784	0.0577	0.0198494	0.007741	0.162811	0.0005862	0.000255	1.05521	0.0010653	1.03635	0.0121396	0.00932	0.0089	0.0069	0.013	0.0144	0.021	0.0041684	0.0001575	4.24214	0.0225357	99.3131	0.350206	69.7516	0.363573	0.363577	2.97187e-19	NM-258C	0.0091559	2.1604e-07	6.45081	1.00067	0.000653	3.6e-07	0.00014	0	0.0002633	3.4e-07	0.01077	0	0.007529
61736-135	CM-Ash2	ARGUS VI (Jan)	2013-08-16	20.5667	4	44.5175	0.0209095	10.5722	0.018321	0.07604	0.0159261	0.199318	0.149805	0.0002712	0.0002236	1.05521	0.0010653	1.03151	0.012174	0.00932	0.0089	0.0069	0.013	0.0144	0.021	0.004153	0.0001579	4.19698	0.009906	99.8494	0.166358	69.0229	0.159879	0.159887	5.28612e-19	NM-258C	0.0091559	2.1604e-07	6.4525	1.00067	0.000653	3.6e-07	0.00014	0	0.0002633	3.4e-07	0.01077	0	0.007529
61736-136	CM-Ash2	ARGUS VI (Jan)	2013-08-16	20.9	4	224.703	0.095782	13.0279	0.061687	0.1184	0.0299666	0.200729	0.231096	0.0016518	0.0005813	1.05521	0.0010653	1.02638	0.0122146	0.00932	0.0089	0.0069	0.013	0.0144	0.021	0.0041366	0.0001584	17.2039	0.0829191	99.7874	0.0982196	267.76	1.2006	1.20061	6.51394e-19	NM-258C	0.0091559	2.1604e-07	6.45429	1.00067	0.000653	3.6e-07	0.00014	0	0.0002633	3.4e-07	0.01077	0	0.007529
61736-137	CM-Ash2	ARGUS VI (Jan)	2013-08-16	21	4	131.386	0.0888455	14.1396	0.063668	0.0772	0.0392173	-0.127806	0.22079	0.000508	0.0005006	1.05521	0.0010653	1.02479	0.0122281	0.00932	0.0089	0.0069	0.013	0.0144	0.021	0.0041315	0.0001585	9.27281	0.0435775	99.8744	0.149174	149.165	0.673196	0.673205	7.06981e-19	NM-258C	0.0091559	2.1604e-07	6.45485	1.00067	0.000653	3.6e-07	0.00014	0	0.0002633	3.4e-07	0.01077	0	0.007529
61736-138	CM-Ash2	ARGUS VI (Jan)	2013-08-16	21.3167	4	54.2465	0.0226185	12.852	0.0174533	0.14508	0.01622	0.0260844	0.150175	0.0026179	0.000232	1.05521	0.0010653	1.01994	0.0122717	0.00932	0.0089	0.0069	0.013	0.0144	0.021	0.0041161	0.000159	4.15283	0.008058	98.5636	0.14242	68.3101	0.130105	0.130114	6.42598e-19	NM-258C	0.0091559	2.1604e-07	6.45654	1.00067	0.000653	3.6e-07	0.00014	0	0.0002633	3.4e-07	0.01077	0	0.007529
61736-139	CM-Ash2	ARGUS VI (Jan)	2013-08-16	21.6333	4	47.2266	0.0218121	11.2048	0.0174533	0.08457	0.0164012	-0.0877676	0.14859	-1.53e-05	0.0002175	1.05521	0.0010653	1.01506	0.0123194	0.00932	0.0089	0.0069	0.013	0.0144	0.021	0.0041005	0.0001595	4.20696	0.0090316	99.9915	0.154459	69.184	0.145754	0.145763	5.60238e-19	NM-258C	0.0091559	2.1604e-07	6.45825	1.00067	0.000653	3.6e-07	0.00014	0	0.0002633	3.4e-07	0.01077	0	0.007529
61736-140	CM-Ash2	ARGUS VI (Jan)	2013-08-16	22.1833	4	52.1918	0.021863	12.543	0.0174533	0.12359	0.0156426	0.141435	0.150006	2.33e-05	0.0002182	1.05521	0.0010653	1.00674	0.0124093	0.00932	0.0089	0.0069	0.013	0.0144	0.021	0.0040739	0.0001605	4.15383	0.008028	100.007	0.14027	68.3263	0.129619	0.129629	6.27148e-19	NM-258C	0.0091559	2.1604e-07	6.46115	1.00067	0.000653	3.6e-07	0.00014	0	0.0002633	3.4e-07	0.01077	0	0.007529
61736-141	CM-Ash2	ARGUS VI (Jan)	2013-08-16	22.5	4	76.1445	0.0235672	18.2272	0.018321	0.1664	0.0170294	0.0317972	0.148433	1.85e-05	0.0002186	1.05521	0.0010653	1.00189	0.0124666	0.00932	0.0089	0.0069	0.013	0.0144	0.021	0.0040585	0.0001611	4.16976	0.0057077	99.9942	0.0978295	68.5836	0.0921417	0.0921554	9.11358e-19	NM-258C	0.0091559	2.1604e-07	6.46285	1.00067	0.000653	3.6e-07	0.00014	0	0.0002633	3.4e-07	0.01077	0	0.007529
61736-143	CM-Ash2	ARGUS VI (Jan)	2013-08-16	22.9333	4	2712.11	0.330238	24.4535	0.0676337	0.273	0.0373363	0.554706	0.231483	0.0009646	0.0006433	1.05521	0.0010653	0.995448	0.0125483	0.00932	0.0089	0.0069	0.013	0.0144	0.021	0.0040379	0.0001619	110.893	0.307136	99.991	0.0186296	1282.78	2.55421	2.5543	1.22268e-18	NM-258C	0.0091559	2.1604e-07	6.4651	1.00067	0.000653	3.6e-07	0.00014	0	0.0002633	3.4e-07	0.01077	0	0.007529
61736-144	CM-Ash2	ARGUS VI (Jan)	2013-08-16	23.0333	4	71.1933	0.0671862	15.7089	0.0656503	0.2073	0.0345398	0.117028	0.216092	-0.0003976	0.0004522	1.05521	0.0010653	0.993855	0.0125695	0.00932	0.0089	0.0069	0.013	0.0144	0.021	0.0040328	0.0001622	4.53277	0.0212914	100.182	0.233409	74.4344	0.342621	0.342626	7.85444e-19	NM-258C	0.0091559	2.1604e-07	6.46566	1.00067	0.000653	3.6e-07	0.00014	0	0.0002633	3.4e-07	0.01077	0	0.007529
61736-145	CM-Ash2	ARGUS VI (Jan)	2013-08-16	23.5667	4	147.126	0.0245323	34.7646	0.0200935	0.4383	0.0176918	0.238363	0.150453	0.0001012	0.0002203	1.05521	0.0010653	0.985811	0.012682	0.00932	0.0089	0.0069	0.013	0.0144	0.021	0.0040071	0.0001633	4.22431	0.003198	99.9942	0.0518008	69.4639	0.051602	0.0516271	1.73823e-18	NM-258C	0.0091559	2.1604e-07	6.46847	1.00067	0.000653	3.6e-07	0.00014	0	0.0002633	3.4e-07	0.01077	0	0.007529
61736-146	CM-Ash2	ARGUS VI (Jan)	2013-08-16	23.8833	4	45.6764	0.0750909	10.1003	0.0735897	0.0553	0.0336155	0.471674	0.231664	0.0010173	0.0004529	1.05521	0.0010653	0.981041	0.0127532	0.00932	0.0089	0.0069	0.013	0.0144	0.021	0.0039919	0.000164	4.48827	0.0362027	99.4109	0.37837	73.7182	0.582802	0.582804	5.05016e-19	NM-258C	0.0091559	2.1604e-07	6.47014	1.00067	0.000653	3.6e-07	0.00014	0	0.0002633	3.4e-07	0.01077	0	0.007529
61736-147	CM-Ash2	ARGUS VI (Jan)	2013-08-17	0.2	4	75.6653	0.0237609	17.9053	0.0192016	0.1768	0.0170294	0.135844	0.150254	7.23e-05	0.0002285	1.05521	0.0010653	0.976191	0.0128289	0.00932	0.0089	0.0069	0.013	0.0144	0.021	0.0039764	0.0001648	4.21769	0.0061062	99.9846	0.102061	69.3571	0.0985339	0.0985469	8.95267e-19	NM-258C	0.0091559	2.1604e-07	6.47184	1.00067	0.000653	3.6e-07	0.00014	0	0.0002633	3.4e-07	0.01077	0	0.007529
61736-148	CM-Ash2	ARGUS VI (Jan)	2013-08-17	0.533333	4	117.15	0.0919114	14.306	0.0666419	0.2102	0.0373363	0.390359	0.211361	0.0008544	0.0005329	1.05521	0.0010653	0.971138	0.0129113	0.00932	0.0089	0.0069	0.013	0.0144	0.021	0.0039603	0.0001656	8.16601	0.0402	99.8109	0.1759	131.986	0.626875	0.626883	7.15302e-19	NM-258C	0.0091559	2.1604e-07	6.47361	1.00067	0.000653	3.6e-07	0.00014	0	0.0002633	3.4e-07	0.01077	0	0.007529
61736-149	CM-Ash2	ARGUS VI (Jan)	2013-08-17	0.85	4	79.0504	0.0246948	18.8997	0.0192016	0.1993	0.0170294	0.148867	0.149787	0.0007198	0.0002226	1.05521	0.0010653	0.966293	0.0129936	0.00932	0.0089	0.0069	0.013	0.0144	0.021	0.0039449	0.0001664	4.16437	0.0056978	99.7427	0.0964696	68.4965	0.0919871	0.0920008	9.44986e-19	NM-258C	0.0091559	2.1604e-07	6.47531	1.00067	0.000653	3.6e-07	0.00014	0	0.0002633	3.4e-07	0.01077	0	0.007529
61736-150	CM-Ash2	ARGUS VI (Jan)	2013-08-17	1.16667	4	82.9278	0.0230666	19.7329	0.0192016	0.1901	0.0170294	0.213353	0.150651	0.0005156	0.0002303	1.05521	0.0010653	0.961434	0.0130792	0.00932	0.0089	0.0069	0.013	0.0144	0.021	0.0039293	0.0001672	4.18803	0.0055298	99.8333	0.0932386	68.8784	0.0892553	0.0892696	9.86644e-19	NM-258C	0.0091559	2.1604e-07	6.47701	1.00067	0.000653	3.6e-07	0.00014	0	0.0002633	3.4e-07	0.01077	0	0.007529
61736-151	CM-Ash2	ARGUS VI (Jan)	2013-08-17	1.26667	4	241.965	0.100855	13.1053	0.0616871	0.1114	0.0326956	0.687918	0.237206	0.0007341	0.0004152	1.05521	0.0010653	0.959846	0.0131079	0.00932	0.0089	0.0069	0.013	0.0144	0.021	0.0039243	0.0001675	18.4435	0.0877203	99.9313	0.0784557	285.621	1.25778	1.2578	6.55267e-19	NM-258C	0.0091559	2.1604e-07	6.47757	1.00067	0.000653	3.6e-07	0.00014	0	0.0002633	3.4e-07	0.01077	0	0.007529
61736-152	CM-Ash2	ARGUS VI (Jan)	2013-08-17	1.58333	4	62.5492	0.0223198	15.0343	0.0174533	0.1598	0.0170294	0.188028	0.150704	5.82e-05	0.000224	1.05521	0.0010653	0.954996	0.0131975	0.00932	0.0089	0.0069	0.013	0.0144	0.021	0.0039088	0.0001684	4.15275	0.0067808	99.9957	0.120069	68.3089	0.109482	0.109493	7.51717e-19	NM-258C	0.0091559	2.1604e-07	6.47927	1.00067	0.000653	3.6e-07	0.00014	0	0.0002633	3.4e-07	0.01077	0	0.007529
61736-153	CM-Ash2	ARGUS VI (Jan)	2013-08-17	1.7	4	1018.92	0.170514	19.9886	0.0716035	0.2433	0.0364005	0.506722	0.226794	0.0010618	0.0005439	1.05521	0.0010653	0.953407	0.0132275	0.00932	0.0089	0.0069	0.013	0.0144	0.021	0.0039037	0.0001687	50.9548	0.182947	99.973	0.028579	700.904	2.09075	2.0908	9.99427e-19	NM-258C	0.0091559	2.1604e-07	6.47983	1.00067	0.000653	3.6e-07	0.00014	0	0.0002633	3.4e-07	0.01077	0	0.007529
61736-154	CM-Ash2	ARGUS VI (Jan)	2013-08-17	1.8	4	643.925	0.150585	12.0626	0.0745832	0.1515	0.0336155	0.445851	0.221663	-0.0010358	0.0004941	1.05521	0.0010653	0.951797	0.0132583	0.00932	0.0089	0.0069	0.013	0.0144	0.021	0.0038986	0.000169	53.4041	0.330722	100.053	0.0403169	728.683	3.72262	3.72265	6.03133e-19	NM-258C	0.0091559	2.1604e-07	6.48039	1.00067	0.000653	3.6e-07	0.00014	0	0.0002633	3.4e-07	0.01077	0	0.007529
61411-01	CM-SS2	ARGUS VI (Obama)	2012-11-30	11.3667	3	574.827	0.55109	20.7551	0.150675	0.5282	0.164	-0.0528714	0.111037	0.006529	0.0026458	1.05726	0.0010441	2.333	0.11	0.0211	0.014	0.0028	0.036	0.0153	0.017	0.007981	0.00049	27.5938	0.205672	99.6612	0.192764	424.515	2.82403	3.15287	2.07551e-18	NM-254E	0.009459	3.5e-05	1.54144	1.00015	0.000698	7.8e-06	4e-05	2e-06	0.000273	2e-07	0.0123	0	0.008068
61411-02	CM-SS2	ARGUS VI (Obama)	2012-11-30	11.5	3	455.956	0.414849	4.71023	0.0871456	0.1302	0.154259	-0.0240493	0.0799566	0.014059	0.0021564	1.05726	0.0010441	2.333	0.11	0.0211	0.014	0.0028	0.036	0.0153	0.017	0.007981	0.00049	95.9031	1.7819	99.0808	0.190464	1181.78	16.1776	16.4952	4.71023e-19	NM-254E	0.009459	3.5e-05	1.54162	1.00015	0.000698	7.8e-06	4e-05	2e-06	0.000273	2e-07	0.0123	0	0.008068
61411-03	CM-SS2	ARGUS VI (Obama)	2012-11-30	11.65	3	4399.38	0.847172	56.2816	0.160636	0.5892	0.144555	0.204905	0.077059	0.016819	0.0022539	1.05726	0.0010441	2.333	0.11	0.0211	0.014	0.0028	0.036	0.0153	0.017	0.007981	0.00049	78.0705	0.223675	99.8864	0.031211	1012.27	2.22775	3.63877	5.62816e-18	NM-254E	0.009459	3.5e-05	1.5418	1.00015	0.000698	7.8e-06	4e-05	2e-06	0.000273	2e-07	0.0123	0	0.008068
61411-04	CM-SS2	ARGUS VI (Obama)	2012-11-30	15.2833	3	66.6	0.245968	14.0071	0.110905	0.0822	0.125284	0.0321657	0.0905022	-0.002327	0.0014592	1.05726	0.0010441	2.333	0.11	0.0211	0.014	0.0028	0.036	0.0153	0.017	0.007981	0.00049	4.79629	0.0521493	101.045	0.839335	81.2175	0.86376	0.912408	1.40071e-18	NM-254E	0.009459	3.5e-05	1.54643	1.00016	0.000698	7.8e-06	4e-05	2e-06	0.000273	2e-07	0.0123	0	0.008068
61411-05	CM-SS2	ARGUS VI (Obama)	2012-11-30	15.4167	3	1772.09	0.67897	35.0434	0.14072	0.3562	0.144555	0.124192	0.0890334	0.0041117	0.0017612	1.05726	0.0010441	2.333	0.11	0.0211	0.014	0.0028	0.036	0.0153	0.017	0.007981	0.00049	50.5258	0.204398	99.9314	0.0617464	715.062	2.39463	3.24523	3.50434e-18	NM-254E	0.009459	3.5e-05	1.5466	1.00016	0.000698	7.8e-06	4e-05	2e-06	0.000273	2e-07	0.0123	0	0.008068
61411-06	CM-SS2	ARGUS VI (Obama)	2012-11-30	15.55	3	623.274	0.357351	15.9422	0.100991	0.2442	0.144555	-0.145705	0.0846209	0.0036782	0.0019652	1.05726	0.0010441	2.333	0.11	0.0211	0.014	0.0028	0.036	0.0153	0.017	0.007981	0.00049	39.0181	0.250941	99.8223	0.124093	575.02	3.17366	3.66142	1.59422e-18	NM-254E	0.009459	3.5e-05	1.54676	1.00016	0.000698	7.8e-06	4e-05	2e-06	0.000273	2e-07	0.0123	0	0.008068
61411-07	CM-SS2	ARGUS VI (Obama)	2012-11-30	15.6833	3	243.894	0.202485	6.23147	0.0655236	0.0842	0.134892	-0.0351154	0.0773157	0.0007073	0.0013601	1.05726	0.0010441	2.333	0.11	0.0211	0.014	0.0028	0.036	0.0153	0.017	0.007981	0.00049	39.0966	0.417564	99.9124	0.203504	576.012	5.27807	5.58585	6.23147e-19	NM-254E	0.009459	3.5e-05	1.54693	1.00016	0.000698	7.8e-06	4e-05	2e-06	0.000273	2e-07	0.0123	0	0.008068
61411-09	CM-SS2	ARGUS VI (Obama)	2012-11-30	15.95	3	1232.22	0.55109	30.4297	0.120833	0.4212	0.134892	0.217855	0.105453	0.0008553	0.001863	1.05726	0.0010441	2.333	0.11	0.0211	0.014	0.0028	0.036	0.0153	0.017	0.007981	0.00049	40.4783	0.162811	99.9808	0.077669	593.395	2.03851	2.76989	3.04297e-18	NM-254E	0.009459	3.5e-05	1.54727	1.00016	0.000698	7.8e-06	4e-05	2e-06	0.000273	2e-07	0.0123	0	0.008068
61411-11	CM-SS2	ARGUS VI (Obama)	2012-11-30	16.6333	3	3102.13	0.718471	32.769	0.110905	0.4292	0.134892	0.0068118	0.0802946	0.0008025	0.0015592	1.05726	0.0010441	2.333	0.11	0.0211	0.014	0.0028	0.036	0.0153	0.017	0.007981	0.00049	94.6512	0.321431	99.9923	0.036019	1170.38	2.93645	4.34277	3.2769e-18	NM-254E	0.009459	3.5e-05	1.54814	1.00016	0.000698	7.8e-06	4e-05	2e-06	0.000273	2e-07	0.0123	0	0.008068
61411-12	CM-SS2	ARGUS VI (Obama)	2012-11-30	16.7667	3	1064.75	0.463249	9.87815	0.100991	0.1552	0.134892	0.0662676	0.083235	0.0035196	0.0020677	1.05726	0.0010441	2.333	0.11	0.0211	0.014	0.0028	0.036	0.0153	0.017	0.007981	0.00049	107.675	1.10369	99.902	0.0844558	1285.66	9.46745	10.0654	9.87815e-19	NM-254E	0.009459	3.5e-05	1.54831	1.00016	0.000698	7.8e-06	4e-05	2e-06	0.000273	2e-07	0.0123	0	0.008068
61411-13	CM-SS2	ARGUS VI (Obama)	2012-11-30	16.9	3	849.962	0.434166	16.5415	0.110905	0.3122	0.125284	0.0495512	0.0773928	0.0034033	0.001863	1.05726	0.0010441	2.333	0.11	0.0211	0.014	0.0028	0.036	0.0153	0.017	0.007981	0.00049	51.3147	0.34673	99.8813	0.0973768	724.28	4.04172	4.60806	1.65415e-18	NM-254E	0.009459	3.5e-05	1.54848	1.00016	0.000698	7.8e-06	4e-05	2e-06	0.000273	2e-07	0.0123	0	0.008068
61411-14	CM-SS2	ARGUS VI (Obama)	2012-11-30	17.0333	3	1595.95	0.531507	10.5106	0.110905	0.0552	0.134892	0.254597	0.0847236	0.003858	0.001863	1.05726	0.0010441	2.333	0.11	0.0211	0.014	0.0028	0.036	0.0153	0.017	0.007981	0.00049	151.73	1.6028	99.9292	0.0585433	1629.21	11.3961	12.075	1.05105e-18	NM-254E	0.009459	3.5e-05	1.54864	1.00016	0.000698	7.8e-06	4e-05	2e-06	0.000273	2e-07	0.0123	0	0.008068
61411-15	CM-SS2	ARGUS VI (Obama)	2012-11-30	17.3833	3	3609.34	0.748131	84.5842	0.420299	1.2552	0.134892	0.207578	0.0980955	0.0223495	0.0030008	1.05726	0.0010441	2.333	0.11	0.0211	0.014	0.0028	0.036	0.0153	0.017	0.007981	0.00049	42.585	0.212095	99.816	0.0383692	619.584	2.61785	3.26125	8.45842e-18	NM-254E	0.009459	3.5e-05	1.54909	1.00016	0.000698	7.8e-06	4e-05	2e-06	0.000273	2e-07	0.0123	0	0.008068
61411-16	CM-SS2	ARGUS VI (Obama)	2012-11-30	17.5167	3	398.66	0.310161	1.49123	0.0831996	0.0782	0.144555	0.0404357	0.0862314	0.0012254	0.0015592	1.05726	0.0010441	2.333	0.11	0.0211	0.014	0.0028	0.036	0.0153	0.017	0.007981	0.00049	267.09	14.9071	99.9094	0.160263	2306.94	73.1938	73.3544	1.49123e-19	NM-254E	0.009459	3.5e-05	1.54926	1.00016	0.000698	7.8e-06	4e-05	2e-06	0.000273	2e-07	0.0123	0	0.008068
61411-17	CM-SS2	ARGUS VI (Obama)	2012-11-30	17.65	3	5993.18	1.30465	69.3768	0.190545	1.0052	0.134892	0.0444686	0.0862407	0.0143777	0.0026883	1.05726	0.0010441	2.333	0.11	0.0211	0.014	0.0028	0.036	0.0153	0.017	0.007981	0.00049	86.3162	0.238117	99.9286	0.033556	1092.61	2.26975	3.79739	6.93768e-18	NM-254E	0.009459	3.5e-05	1.54943	1.00016	0.000698	7.8e-06	4e-05	2e-06	0.000273	2e-07	0.0123	0	0.008068
61411-18	CM-SS2	ARGUS VI (Obama)	2012-11-30	17.9833	3	301.327	0.228254	48.3055	0.130772	0.3402	0.134892	0.358327	0.0731066	-0.0004557	0.0016599	1.05726	0.0010441	2.333	0.11	0.0211	0.014	0.0028	0.036	0.0153	0.017	0.007981	0.00049	6.23326	0.0203154	100.054	0.196306	104.865	0.33217	0.502545	4.83055e-18	NM-254E	0.009459	3.5e-05	1.54986	1.00016	0.000698	7.8e-06	4e-05	2e-06	0.000273	2e-07	0.0123	0	0.008068
61411-19	CM-SS2	ARGUS VI (Obama)	2012-11-30	18.1167	3	38.0995	0.113265	10.0417	0.0198021	0.154	0.0502096	0.0475858	0.033172	0.0008522	0.0005672	1.05726	0.0010441	2.333	0.11	0.0211	0.014	0.0028	0.036	0.0153	0.017	0.007981	0.00049	3.76121	0.0215839	99.3432	0.611593	63.9924	0.360879	0.429394	1.00417e-18	NM-254E	0.009459	3.5e-05	1.55002	1.00016	0.000698	7.8e-06	4e-05	2e-06	0.000273	2e-07	0.0123	0	0.008068
61411-20	CM-SS2	ARGUS VI (Obama)	2012-11-30	18.55	3	1915.58	0.649384	17.7966	0.0910967	0.3552	0.144555	-0.0710169	0.0745895	0.0028747	0.001863	1.05726	0.0010441	2.333	0.11	0.0211	0.014	0.0028	0.036	0.0153	0.017	0.007981	0.00049	107.58	0.552809	99.9551	0.0560175	1284.84	4.74409	5.84605	1.77966e-18	NM-254E	0.009459	3.5e-05	1.55059	1.00016	0.000698	7.8e-06	4e-05	2e-06	0.000273	2e-07	0.0123	0	0.008068
61411-21	CM-SS2	ARGUS VI (Obama)	2012-11-30	18.6833	3	1351.76	0.502195	18.2819	0.0871458	0.2452	0.134892	0.161899	0.0967079	0.0001364	0.0017612	1.05726	0.0010441	2.333	0.11	0.0211	0.014	0.0028	0.036	0.0153	0.017	0.007981	0.00049	73.9309	0.354688	99.998	0.0653385	970.573	3.61399	4.56401	1.82819e-18	NM-254E	0.009459	3.5e-05	1.55075	1.00016	0.000698	7.8e-06	4e-05	2e-06	0.000273	2e-07	0.0123	0	0.008068
61411-22	CM-SS2	ARGUS VI (Obama)	2012-11-30	18.8167	3	132.605	0.136015	30.3312	0.100991	0.5762	0.102528	0.678063	0.0603466	0.000978	0.0011653	1.05726	0.0010441	2.333	0.11	0.0211	0.014	0.0028	0.036	0.0153	0.017	0.007981	0.00049	4.3562	0.0190372	99.8233	0.299899	73.9135	0.316578	0.414813	3.03312e-18	NM-254E	0.009459	3.5e-05	1.55092	1.00016	0.000698	7.8e-06	4e-05	2e-06	0.000273	2e-07	0.0123	0	0.008068
61411-23	CM-SS2	ARGUS VI (Obama)	2012-11-30	18.95	3	332.358	0.27313	11.1687	0.100991	0.1972	0.144555	0.0130292	0.080448	0.0038791	0.0025843	1.05726	0.0010441	2.333	0.11	0.0211	0.014	0.0028	0.036	0.0153	0.017	0.007981	0.00049	29.6467	0.277954	99.6526	0.25922	452.489	3.75865	4.04078	1.11687e-18	NM-254E	0.009459	3.5e-05	1.5511	1.00016	0.000698	7.8e-06	4e-05	2e-06	0.000273	2e-07	0.0123	0	0.008068
61411-24	CM-SS2	ARGUS VI (Obama)	2012-11-30	19.0833	3	176.218	0.11962	45.7185	0.0236046	0.542	0.0516236	0.137907	0.0331985	0.0024169	0.0006016	1.05726	0.0010441	2.333	0.11	0.0211	0.014	0.0028	0.036	0.0153	0.017	0.007981	0.00049	3.83084	0.0051148	99.5967	0.140073	65.1562	0.085464	0.251797	4.57185e-18	NM-254E	0.009459	3.5e-05	1.55126	1.00016	0.000698	7.8e-06	4e-05	2e-06	0.000273	2e-07	0.0123	0	0.008068
61411-25	CM-SS2	ARGUS VI (Obama)	2012-11-30	19.7333	3	212.915	0.228254	26.08	0.120833	0.3372	0.144555	0.0768284	0.0952988	0.0052324	0.0017612	1.05726	0.0010441	2.333	0.11	0.0211	0.014	0.0028	0.036	0.0153	0.017	0.007981	0.00049	8.09632	0.0434935	99.27	0.28942	135.076	0.699505	0.849382	2.608e-18	NM-254E	0.009459	3.5e-05	1.55209	1.00016	0.000698	7.8e-06	4e-05	2e-06	0.000273	2e-07	0.0123	0	0.008068
61411-26	CM-SS2	ARGUS VI (Obama)	2012-11-30	19.8667	3	924.064	0.463249	208.311	0.310365	2.5692	0.144555	1.26431	0.0688965	0.0173275	0.0022738	1.05726	0.0010441	2.333	0.11	0.0211	0.014	0.0028	0.036	0.0153	0.017	0.007981	0.00049	4.40365	0.0076642	99.4514	0.102074	74.7024	0.127397	0.299314	2.08311e-17	NM-254E	0.009459	3.5e-05	1.55226	1.00016	0.000698	7.8e-06	4e-05	2e-06	0.000273	2e-07	0.0123	0	0.008068
61411-27	CM-SS2	ARGUS VI (Obama)	2012-11-30	20	3	6557.43	1.10549	64.058	0.150676	0.3989	0.106283	0.216874	0.0938286	0.0118614	0.0019652	1.05726	0.0010441	2.333	0.11	0.0211	0.014	0.0028	0.036	0.0153	0.017	0.007981	0.00049	102.304	0.241449	99.9463	0.0254559	1238.99	2.12462	3.95088	6.4058e-18	NM-254E	0.009459	3.5e-05	1.55242	1.00016	0.000698	7.8e-06	4e-05	2e-06	0.000273	2e-07	0.0123	0	0.008068
61411-28	CM-SS2	ARGUS VI (Obama)	2012-11-30	20.1167	3	637.273	0.338379	58.1931	0.130772	0.8512	0.144555	0.115823	0.081994	0.0193786	0.0028965	1.05726	0.0010441	2.333	0.11	0.0211	0.014	0.0028	0.036	0.0153	0.017	0.007981	0.00049	10.8439	0.0291303	99.0949	0.154825	178.741	0.457458	0.778656	5.81931e-18	NM-254E	0.009459	3.5e-05	1.55259	1.00016	0.000698	7.8e-06	4e-05	2e-06	0.000273	2e-07	0.0123	0	0.008068
61411-29	CM-SS2	ARGUS VI (Obama)	2012-11-30	20.25	3	2730.89	0.857088	45.7581	0.210499	0.7432	0.144555	0.124842	0.0834745	0.0063531	0.0023771	1.05726	0.0010441	2.333	0.11	0.0211	0.014	0.0028	0.036	0.0153	0.017	0.007981	0.00049	59.6319	0.275435	99.9311	0.0514037	818.751	3.04916	3.90691	4.57581e-18	NM-254E	0.009459	3.5e-05	1.55276	1.00016	0.000698	7.8e-06	4e-05	2e-06	0.000273	2e-07	0.0123	0	0.008068
61411-30	CM-SS2	ARGUS VI (Obama)	2012-11-30	20.3833	3	97.4125	0.114017	25.109	0.0205215	0.2829	0.052345	0.156069	0.0332341	0.0010382	0.0005471	1.05726	0.0010441	2.333	0.11	0.0211	0.014	0.0028	0.036	0.0153	0.017	0.007981	0.00049	3.85971	0.0085319	99.6945	0.23574	65.6385	0.142523	0.277902	2.5109e-18	NM-254E	0.009459	3.5e-05	1.55293	1.00016	0.000698	7.8e-06	4e-05	2e-06	0.000273	2e-07	0.0123	0	0.008068
61411-31	CM-SS2	ARGUS VI (Obama)	2012-11-30	21.0333	3	377.37	0.282312	11.6334	0.0861588	0.0972	0.125284	-0.117464	0.0879624	0.0095566	0.0023771	1.05726	0.0010441	2.333	0.11	0.0211	0.014	0.0028	0.036	0.0153	0.017	0.007981	0.00049	32.1844	0.247269	99.2425	0.215343	486.487	3.28218	3.643	1.16334e-18	NM-254E	0.009459	3.5e-05	1.55376	1.00016	0.000698	7.8e-06	4e-05	2e-06	0.000273	2e-07	0.0123	0	0.008068
61411-32	CM-SS2	ARGUS VI (Obama)	2012-11-30	21.1667	3	2054.71	0.61	119.272	0.300374	1.6762	0.144555	0.100073	0.0820643	0.0085416	0.00166	1.05726	0.0010441	2.333	0.11	0.0211	0.014	0.0028	0.036	0.0153	0.017	0.007981	0.00049	17.1978	0.0438292	99.8766	0.0484027	275.897	0.652709	1.15069	1.19272e-17	NM-254E	0.009459	3.5e-05	1.55393	1.00016	0.000698	7.8e-06	4e-05	2e-06	0.000273	2e-07	0.0123	0	0.008068
61411-33	CM-SS2	ARGUS VI (Obama)	2012-11-30	21.5	3	93.371	0.194165	4.4496	0.0674792	-0.1848	0.115741	0.197713	0.0835599	0.0066174	0.0020678	1.05726	0.0010441	2.333	0.11	0.0211	0.014	0.0028	0.036	0.0153	0.017	0.007981	0.00049	20.5365	0.343751	97.9014	0.721575	324.954	4.98381	5.10413	4.4496e-19	NM-254E	0.009459	3.5e-05	1.55435	1.00016	0.000698	7.8e-06	4e-05	2e-06	0.000273	2e-07	0.0123	0	0.008068
61411-34	CM-SS2	ARGUS VI (Obama)	2012-11-30	21.6333	3	3697.65	0.787718	67.3296	0.230462	0.9442	0.134892	0.0352876	0.086524	0.0043126	0.0021706	1.05726	0.0010441	2.333	0.11	0.0211	0.014	0.0028	0.036	0.0153	0.017	0.007981	0.00049	54.8917	0.188526	99.9654	0.0348394	765.508	2.14864	3.15835	6.73296e-18	NM-254E	0.009459	3.5e-05	1.55452	1.00016	0.000698	7.8e-06	4e-05	2e-06	0.000273	2e-07	0.0123	0	0.008068
61411-35	CM-SS2	ARGUS VI (Obama)	2012-11-30	21.9833	3	132.184	0.245968	4.74755	0.0753246	0.0622	0.125284	-0.0017105	0.0850695	0.0025787	0.0015592	1.05726	0.0010441	2.333	0.11	0.0211	0.014	0.0028	0.036	0.0153	0.017	0.007981	0.00049	27.6726	0.452933	99.4184	0.438809	425.597	6.21546	6.3723	4.74755e-19	NM-254E	0.009459	3.5e-05	1.55496	1.00016	0.000698	7.8e-06	4e-05	2e-06	0.000273	2e-07	0.0123	0	0.008068
61411-36	CM-SS2	ARGUS VI (Obama)	2012-11-30	22.1167	3	307.172	0.119231	74.345	0.0236046	0.8736	0.0516236	0.396092	0.0342482	0.0015108	0.0005838	1.05726	0.0010441	2.333	0.11	0.0211	0.014	0.0028	0.036	0.0153	0.017	0.007981	0.00049	4.11803	0.0031257	99.8635	0.0790407	69.9485	0.052092	0.259227	7.4345e-18	NM-254E	0.009459	3.5e-05	1.55513	1.00016	0.000698	7.8e-06	4e-05	2e-06	0.000273	2e-07	0.0123	0	0.008068
61411-37	CM-SS2	ARGUS VI (Obama)	2012-11-30	22.5333	3	1350.74	0.492443	25.983	0.140721	0.2492	0.144555	-0.0317358	0.0806856	0.0068183	0.001863	1.05726	0.0010441	2.333	0.11	0.0211	0.014	0.0028	0.036	0.0153	0.017	0.007981	0.00049	51.8991	0.28257	99.8493	0.0659187	731.08	3.28161	3.96772	2.5983e-18	NM-254E	0.009459	3.5e-05	1.55568	1.00016	0.000698	7.8e-06	4e-05	2e-06	0.000273	2e-07	0.0123	0	0.008068
61411-38	CM-SS2	ARGUS VI (Obama)	2012-11-30	22.6667	3	316.453	0.319531	43.2197	0.130772	0.6652	0.115741	0.293744	0.0748425	0.0061628	0.0020678	1.05726	0.0010441	2.333	0.11	0.0211	0.014	0.0028	0.036	0.0153	0.017	0.007981	0.00049	7.27201	0.0272618	99.4271	0.241504	121.771	0.441649	0.620544	4.32197e-18	NM-254E	0.009459	3.5e-05	1.55585	1.00016	0.000698	7.8e-06	4e-05	2e-06	0.000273	2e-07	0.0123	0	0.008068
61411-39	CM-SS2	ARGUS VI (Obama)	2012-11-30	22.8	3	55.234	0.21095	12.4625	0.100991	0.1572	0.144555	0.221888	0.0661992	0.0017646	0.0016599	1.05726	0.0010441	2.333	0.11	0.0211	0.014	0.0028	0.036	0.0153	0.017	0.007981	0.00049	4.38327	0.0559344	99.079	1.04651	74.3636	0.929929	0.968234	1.24625e-18	NM-254E	0.009459	3.5e-05	1.55601	1.00016	0.000698	7.8e-06	4e-05	2e-06	0.000273	2e-07	0.0123	0	0.008068
61411-40	CM-SS2	ARGUS VI (Obama)	2012-11-30	23.15	3	15.774	0.186011	1.80559	0.0519313	-0.2128	0.134892	-0.0549432	0.0719686	0.0032553	0.0015592	1.05726	0.0010441	2.333	0.11	0.0211	0.014	0.0028	0.036	0.0153	0.017	0.007981	0.00049	8.18672	0.363864	93.7987	3.36352	136.53	5.84738	5.8676	1.80559e-19	NM-254E	0.009459	3.5e-05	1.55646	1.00016	0.000698	7.8e-06	4e-05	2e-06	0.000273	2e-07	0.0123	0	0.008068
61411-41	CM-SS2	ARGUS VI (Obama)	2012-11-30	23.2833	3	280.368	0.264008	13.9448	0.0891208	0.2202	0.154259	-0.0364252	0.0851608	0.0045558	0.0015592	1.05726	0.0010441	2.333	0.11	0.0211	0.014	0.0028	0.036	0.0153	0.017	0.007981	0.00049	19.9999	0.133492	99.5147	0.212503	317.158	1.94366	2.22235	1.39448e-18	NM-254E	0.009459	3.5e-05	1.55663	1.00016	0.000698	7.8e-06	4e-05	2e-06	0.000273	2e-07	0.0123	0	0.008068
61411-42	CM-SS2	ARGUS VI (Obama)	2012-11-30	23.4167	3	1968.03	0.669104	31.7939	0.130772	0.4382	0.125284	-0.0017125	0.089621	0.0055179	0.0021706	1.05726	0.0010441	2.333	0.11	0.0211	0.014	0.0028	0.036	0.0153	0.017	0.007981	0.00049	61.8396	0.256067	99.9165	0.0582343	843.03	2.79739	3.75153	3.17939e-18	NM-254E	0.009459	3.5e-05	1.5568	1.00016	0.000698	7.8e-06	4e-05	2e-06	0.000273	2e-07	0.0123	0	0.008068
61411-43	CM-SS2	ARGUS VI (Obama)	2012-11-30	23.55	3	8759.57	1.80336	84.8774	0.190545	1.1032	0.125284	0.256277	0.0896307	0.085373	0.0045735	1.05726	0.0010441	2.333	0.11	0.0211	0.014	0.0028	0.036	0.0153	0.017	0.007981	0.00049	102.895	0.232544	99.7098	0.0329771	1244.19	2.04046	3.91459	8.48774e-18	NM-254E	0.009459	3.5e-05	1.55697	1.00016	0.000698	7.8e-06	4e-05	2e-06	0.000273	2e-07	0.0123	0	0.008068
61411-44	CM-SS2	ARGUS VI (Obama)	2012-11-30	23.8833	3	1609.68	0.590339	200.357	0.340342	2.4072	0.134892	0.203397	0.0648335	0.194356	0.006471	1.05726	0.0010441	2.333	0.11	0.0211	0.014	0.0028	0.036	0.0153	0.017	0.007981	0.00049	7.73702	0.0165656	96.3992	0.130316	129.288	0.267268	0.53364	2.00357e-17	NM-254E	0.009459	3.5e-05	1.5574	1.00016	0.000698	7.8e-06	4e-05	2e-06	0.000273	2e-07	0.0123	0	0.008068
61411-45	CM-SS2	ARGUS VI (Obama)	2012-12-01	0.233333	3	3023.07	0.807527	24.1336	0.0990107	0.1442	0.144555	0.0931596	0.0867096	0.0039637	0.0017612	1.05726	0.0010441	2.333	0.11	0.0211	0.014	0.0028	0.036	0.0153	0.017	0.007981	0.00049	125.207	0.515258	99.9611	0.0415719	1430.19	4.08432	5.49254	2.41336e-18	NM-254E	0.009459	3.5e-05	1.55785	1.00016	0.000698	7.8e-06	4e-05	2e-06	0.000273	2e-07	0.0123	0	0.008068
61411-46	CM-SS2	ARGUS VI (Obama)	2012-12-01	0.366667	3	931.031	0.521728	94.661	0.260418	1.5512	0.154259	0.258944	0.0793369	0.0312094	0.0023774	1.05726	0.0010441	2.333	0.11	0.0211	0.014	0.0028	0.036	0.0153	0.017	0.007981	0.00049	9.7294	0.0283556	99.003	0.10968	161.155	0.449592	0.726603	9.4661e-18	NM-254E	0.009459	3.5e-05	1.55802	1.00016	0.000698	7.8e-06	4e-05	2e-06	0.000273	2e-07	0.0123	0	0.008068
61411-47	CM-SS2	ARGUS VI (Obama)	2012-12-01	0.5	3	737.508	0.443847	33.4162	0.130773	0.6562	0.134892	-0.0537576	0.0911908	0.0029276	0.0014592	1.05726	0.0010441	2.333	0.11	0.0211	0.014	0.0028	0.036	0.0153	0.017	0.007981	0.00049	22.0361	0.0882508	99.8815	0.103541	346.568	1.26447	1.72156	3.34162e-18	NM-254E	0.009459	3.5e-05	1.55819	1.00016	0.000698	7.8e-06	4e-05	2e-06	0.000273	2e-07	0.0123	0	0.008068
61411-48	CM-SS2	ARGUS VI (Obama)	2012-12-01	0.633333	3	3216.25	1.00603	38.8581	0.2105	0.3222	0.134892	0.512856	0.0735077	0.0110368	0.0022738	1.05726	0.0010441	2.333	0.11	0.0211	0.014	0.0028	0.036	0.0153	0.017	0.007981	0.00049	82.6781	0.449014	99.899	0.0489819	1057.6	4.36268	5.27903	3.88581e-18	NM-254E	0.009459	3.5e-05	1.55836	1.00016	0.000698	7.8e-06	4e-05	2e-06	0.000273	2e-07	0.0123	0	0.008068
61411-49	CM-SS2	ARGUS VI (Obama)	2012-12-01	0.766667	3	2024.31	0.570701	32.7361	0.110905	0.5452	0.144555	0.0490936	0.0778952	0.0097575	0.0019652	1.05726	0.0010441	2.333	0.11	0.0211	0.014	0.0028	0.036	0.0153	0.017	0.007981	0.00049	61.7405	0.210682	99.8566	0.0492452	841.946	2.30295	3.39699	3.27361e-18	NM-254E	0.009459	3.5e-05	1.55853	1.00016	0.000698	7.8e-06	4e-05	2e-06	0.000273	2e-07	0.0123	0	0.008068
61411-50	CM-SS2	ARGUS VI (Obama)	2012-12-01	0.9	3	6951.29	1.60378	67.3726	0.160637	1.0832	0.144555	0.218218	0.0706246	0.0028324	0.0014592	1.05726	0.0010441	2.333	0.11	0.0211	0.014	0.0028	0.036	0.0153	0.017	0.007981	0.00049	103.157	0.247211	99.9882	0.0332235	1246.48	2.16644	3.98531	6.73726e-18	NM-254E	0.009459	3.5e-05	1.5587	1.00016	0.000698	7.8e-06	4e-05	2e-06	0.000273	2e-07	0.0123	0	0.008068
61411-51	CM-SS2	ARGUS VI (Obama)	2012-12-01	1.45	3	464.599	0.366879	15.4501	0.095052	0.2462	0.125284	-0.0173094	0.0838318	0.000813	0.0016599	1.05726	0.0010441	2.333	0.11	0.0211	0.014	0.0028	0.036	0.0153	0.017	0.007981	0.00049	30.0472	0.189156	99.9477	0.154324	457.896	2.55032	2.95823	1.54501e-18	NM-254E	0.009459	3.5e-05	1.55941	1.00016	0.000698	7.8e-06	4e-05	2e-06	0.000273	2e-07	0.0123	0	0.008068
61411-52	CM-SS2	ARGUS VI (Obama)	2012-12-01	1.58333	3	652.145	0.347851	16.8776	0.110905	0.3172	0.154259	0.0616033	0.094261	0.0006439	0.0015592	1.05726	0.0010441	2.333	0.11	0.0211	0.014	0.0028	0.036	0.0153	0.017	0.007981	0.00049	38.6207	0.256157	99.9715	0.103783	569.987	3.24853	3.71985	1.68776e-18	NM-254E	0.009459	3.5e-05	1.55958	1.00016	0.000698	7.8e-06	4e-05	2e-06	0.000273	2e-07	0.0123	0	0.008068
61411-53	CM-SS2	ARGUS VI (Obama)	2012-12-01	1.71667	3	193.36	0.245968	26.0984	0.100991	0.2552	0.134892	0.208694	0.0764912	0.0035048	0.0011462	1.05726	0.0010441	2.333	0.11	0.0211	0.014	0.0028	0.036	0.0153	0.017	0.007981	0.00049	7.36147	0.032764	99.4677	0.252088	123.219	0.530366	0.689714	2.60984e-18	NM-254E	0.009459	3.5e-05	1.55975	1.00016	0.000698	7.8e-06	4e-05	2e-06	0.000273	2e-07	0.0123	0	0.008068
61411-54	CM-SS2	ARGUS VI (Obama)	2012-12-01	1.85	3	106.21	0.21095	14.7365	0.0970309	0.0532	0.144555	0.0113874	0.0972793	0.0017434	0.001262	1.05726	0.0010441	2.333	0.11	0.0211	0.014	0.0028	0.036	0.0153	0.017	0.007981	0.00049	7.16389	0.0555578	99.5097	0.452125	120.018	0.900915	0.998205	1.47365e-18	NM-254E	0.009459	3.5e-05	1.55992	1.00016	0.000698	7.8e-06	4e-05	2e-06	0.000273	2e-07	0.0123	0	0.008068
61411-55	CM-SS2	ARGUS VI (Obama)	2012-12-01	1.96667	3	351.011	0.12083	86.2308	0.0252429	1.0312	0.052345	0.32559	0.0353696	0.0009843	0.0005619	1.05726	0.0010441	2.333	0.11	0.0211	0.014	0.0028	0.036	0.0153	0.017	0.007981	0.00049	4.05944	0.0026755	99.9237	0.0683284	68.972	0.0446123	0.254403	8.62308e-18	NM-254E	0.009459	3.5e-05	1.56009	1.00016	0.000698	7.8e-06	4e-05	2e-06	0.000273	2e-07	0.0123	0	0.008068
61411-56	CM-SS2	ARGUS VI (Obama)	2012-12-01	2.41667	3	8792.82	2.00302	109.702	0.310366	1.5812	0.134892	0.217867	0.0765358	0.0477556	0.0035236	1.05726	0.0010441	2.333	0.11	0.0211	0.014	0.0028	0.036	0.0153	0.017	0.007981	0.00049	80.014	0.227333	99.8384	0.0343377	1031.53	2.24048	3.67883	1.09702e-17	NM-254E	0.009459	3.5e-05	1.56065	1.00016	0.000698	7.8e-06	4e-05	2e-06	0.000273	2e-07	0.0123	0	0.008068
61411-57	CM-SS2	ARGUS VI (Obama)	2012-12-01	2.55	3	1123.96	0.463249	25.905	0.110905	0.3722	0.134892	0.0939617	0.091345	0.0014051	0.0016599	1.05726	0.0010441	2.333	0.11	0.0211	0.014	0.0028	0.036	0.0153	0.017	0.007981	0.00049	43.364	0.187521	99.9635	0.0730451	629.174	2.30244	3.03028	2.5905e-18	NM-254E	0.009459	3.5e-05	1.56082	1.00016	0.000698	7.8e-06	4e-05	2e-06	0.000273	2e-07	0.0123	0	0.008068
61411-58	CM-SS2	ARGUS VI (Obama)	2012-12-01	2.88333	3	196.484	0.27313	9.49442	0.0910969	-0.0168	0.134892	-0.104448	0.0635721	-0.0003817	0.0016599	1.05726	0.0010441	2.333	0.11	0.0211	0.014	0.0028	0.036	0.0153	0.017	0.007981	0.00049	20.6974	0.207388	100.053	0.319583	327.285	3.00295	3.20116	9.49442e-19	NM-254E	0.009459	3.5e-05	1.56126	1.00016	0.000698	7.8e-06	4e-05	2e-06	0.000273	2e-07	0.0123	0	0.008068
61411-59	CM-SS2	ARGUS VI (Obama)	2012-12-01	3.01667	3	42.879	0.228254	9.53532	0.0901088	0.0142	0.144555	-0.181594	0.0839402	-0.0036063	0.0014592	1.05726	0.0010441	2.333	0.11	0.0211	0.014	0.0028	0.036	0.0153	0.017	0.007981	0.00049	4.59976	0.0674486	102.474	1.27099	77.9594	1.11916	1.15424	9.53532e-19	NM-254E	0.009459	3.5e-05	1.56143	1.00016	0.000698	7.8e-06	4e-05	2e-06	0.000273	2e-07	0.0123	0	0.008068
61411-60	CM-SS2	ARGUS VI (Obama)	2012-12-01	3.15	3	1837.02	0.521728	32.046	0.130773	0.4172	0.154259	0.0174899	0.0928854	0.0090597	0.0020678	1.05726	0.0010441	2.333	0.11	0.0211	0.014	0.0028	0.036	0.0153	0.017	0.007981	0.00049	57.2323	0.234941	99.8531	0.0523162	791.992	2.63917	3.55308	3.2046e-18	NM-254E	0.009459	3.5e-05	1.5616	1.00016	0.000698	7.8e-06	4e-05	2e-06	0.000273	2e-07	0.0123	0	0.008068
61411-62	CM-SS2	ARGUS VI (Obama)	2012-12-01	3.63333	3	106.027	0.186011	23.9197	0.110905	0.1772	0.134892	0.126071	0.0751489	0.0037501	0.001061	1.05726	0.0010441	2.333	0.11	0.0211	0.014	0.0028	0.036	0.0153	0.017	0.007981	0.00049	4.37822	0.0254736	98.9525	0.387848	74.2797	0.423527	0.501919	2.39197e-18	NM-254E	0.009459	3.5e-05	1.56221	1.00016	0.000698	7.8e-06	4e-05	2e-06	0.000273	2e-07	0.0123	0	0.008068
61411-63	CM-SS2	ARGUS VI (Obama)	2012-12-01	3.76667	3	362.462	0.264008	39.2822	0.120833	0.4722	0.134892	0.119366	0.0929325	0.0065223	0.0019652	1.05726	0.0010441	2.333	0.11	0.0211	0.014	0.0028	0.036	0.0153	0.017	0.007981	0.00049	9.16985	0.0326271	99.4659	0.191649	152.261	0.519838	0.749985	3.92822e-18	NM-254E	0.009459	3.5e-05	1.56239	1.00016	0.000698	7.8e-06	4e-05	2e-06	0.000273	2e-07	0.0123	0	0.008068
61411-64	CM-SS2	ARGUS VI (Obama)	2012-12-01	3.9	3	321.289	0.27313	27.6983	0.110905	0.2502	0.134892	-0.0306261	0.0722503	0.0014157	0.0014592	1.05726	0.0010441	2.333	0.11	0.0211	0.014	0.0028	0.036	0.0153	0.017	0.007981	0.00049	11.5761	0.0499525	99.8675	0.181115	190.204	0.779551	1.02691	2.76983e-18	NM-254E	0.009459	3.5e-05	1.56256	1.00016	0.000698	7.8e-06	4e-05	2e-06	0.000273	2e-07	0.0123	0	0.008068
61411-65	CM-SS2	ARGUS VI (Obama)	2012-12-01	4.23333	3	154.152	0.245968	11.0115	0.0940629	0.1082	0.134892	-0.142232	0.0944671	0.0017329	0.0015592	1.05726	0.0010441	2.333	0.11	0.0211	0.014	0.0028	0.036	0.0153	0.017	0.007981	0.00049	13.9431	0.128385	99.6571	0.37655	226.774	1.96392	2.11656	1.10115e-18	NM-254E	0.009459	3.5e-05	1.56299	1.00016	0.000698	7.8e-06	4e-05	2e-06	0.000273	2e-07	0.0123	0	0.008068
61411-66	CM-SS2	ARGUS VI (Obama)	2012-12-01	4.58333	3	1316.55	0.570701	12.3189	0.110905	0.1902	0.134892	0.0988094	0.0825668	0.0099689	0.0015593	1.05726	0.0010441	2.333	0.11	0.0211	0.014	0.0028	0.036	0.0153	0.017	0.007981	0.00049	106.625	0.961865	99.775	0.0706853	1276.62	8.29168	8.96208	1.23189e-18	NM-254E	0.009459	3.5e-05	1.56344	1.00016	0.000698	7.8e-06	4e-05	2e-06	0.000273	2e-07	0.0123	0	0.008068
61411-67	CM-SS2	ARGUS VI (Obama)	2012-12-01	4.71667	3	393.372	0.27313	12.6002	0.100991	0.3222	0.134892	-0.103355	0.0870299	0.0036465	0.0016599	1.05726	0.0010441	2.333	0.11	0.0211	0.014	0.0028	0.036	0.0153	0.017	0.007981	0.00049	31.1244	0.253527	99.722	0.159513	472.363	3.39131	3.72481	1.26002e-18	NM-254E	0.009459	3.5e-05	1.56361	1.00016	0.000698	7.8e-06	4e-05	2e-06	0.000273	2e-07	0.0123	0	0.008068
61411-68	CM-SS2	ARGUS VI (Obama)	2012-12-01	4.85	3	924.213	0.482701	21.4183	0.120833	0.1422	0.144555	0.0362797	0.0885298	0.0020183	0.0017612	1.05726	0.0010441	2.333	0.11	0.0211	0.014	0.0028	0.036	0.0153	0.017	0.007981	0.00049	43.1145	0.245549	99.9351	0.0931711	626.108	3.01998	3.60139	2.14183e-18	NM-254E	0.009459	3.5e-05	1.56378	1.00016	0.000698	7.8e-06	4e-05	2e-06	0.000273	2e-07	0.0123	0	0.008068
61411-69	CM-SS2	ARGUS VI (Obama)	2012-12-01	4.98333	3	609.692	0.4245	22.4295	0.110905	0.3282	0.144555	-0.0947752	0.0870488	0.0017857	0.0016599	1.05726	0.0010441	2.333	0.11	0.0211	0.014	0.0028	0.036	0.0153	0.017	0.007981	0.00049	27.1504	0.137398	99.9115	0.127595	418.417	1.89287	2.34488	2.24295e-18	NM-254E	0.009459	3.5e-05	1.56395	1.00016	0.000698	7.8e-06	4e-05	2e-06	0.000273	2e-07	0.0123	0	0.008068
61411-70	CM-SS2	ARGUS VI (Obama)	2012-12-01	5.11667	3	145.966	0.27313	7.70164	0.0851723	0.1672	0.115741	0.147183	0.0900421	0.0002738	0.0016599	1.05726	0.0010441	2.333	0.11	0.0211	0.014	0.0028	0.036	0.0153	0.017	0.007981	0.00049	18.9358	0.221983	99.9529	0.430138	301.599	3.2597	3.41823	7.70164e-19	NM-254E	0.009459	3.5e-05	1.56412	1.00016	0.000698	7.8e-06	4e-05	2e-06	0.000273	2e-07	0.0123	0	0.008068
61411-71	CM-SS2	ARGUS VI (Obama)	2012-12-01	5.25	3	1096.64	0.590339	36.6778	0.130773	0.4322	0.115741	0.0508393	0.0796558	0.0016166	0.0014592	1.05726	0.0010441	2.333	0.11	0.0211	0.014	0.0028	0.036	0.0153	0.017	0.007981	0.00049	29.8782	0.108418	99.9564	0.0858485	455.616	1.46358	2.09031	3.66778e-18	NM-254E	0.009459	3.5e-05	1.56429	1.00016	0.000698	7.8e-06	4e-05	2e-06	0.000273	2e-07	0.0123	0	0.008068
61411-72	CM-SS2	ARGUS VI (Obama)	2012-12-01	5.8	3	294.265	0.291548	22.6605	0.0980209	0.3602	0.134892	0.0201885	0.093088	0.0115971	0.0019652	1.05726	0.0010441	2.333	0.11	0.0211	0.014	0.0028	0.036	0.0153	0.017	0.007981	0.00049	12.8253	0.0625724	98.8257	0.243091	209.595	0.966206	1.21265	2.26605e-18	NM-254E	0.009459	3.5e-05	1.565	1.00016	0.000698	7.8e-06	4e-05	2e-06	0.000273	2e-07	0.0123	0	0.008068
61411-73	CM-SS2	ARGUS VI (Obama)	2013-02-15	11.9667	4	20.8049	0.192183	4.74824	0.0088831	0.0532	0.0197231	-0.0941356	0.104431	0.0077122	0.0006528	1.06567	0.0002916	2.76134	0.189329	0.01214	0.0034	0.0071	0.01	0.01464	0.0099	0.0088671	0.000586	3.88778	0.0580821	88.8946	1.55326	66.1073	0.97	0.999309	4.74824e-19	NM-254E	0.009459	3.5e-05	7.05664	1.0007	0.000698	7.8e-06	4e-05	2e-06	0.000273	2e-07	0.0123	0	0.008068
61411-74	CM-SS2	ARGUS VI (Obama)	2013-02-15	12.65	4	327.517	0.327821	8.89278	0.0651344	-0.0508	0.0756637	-0.401324	0.318433	0.00287	0.0029343	1.06567	0.0002916	2.68351	0.185921	0.01214	0.0034	0.0071	0.01	0.01464	0.0099	0.0086368	0.0005754	36.7197	0.288801	99.7265	0.302277	545.718	3.7114	4.10162	8.89278e-19	NM-254E	0.009459	3.5e-05	7.0606	1.0007	0.000698	7.8e-06	4e-05	2e-06	0.000273	2e-07	0.0123	0	0.008068
61411-75	CM-SS2	ARGUS VI (Obama)	2013-02-15	12.7833	4	118.527	0.251488	5.68914	0.0601383	0.2103	0.0647765	0.335837	0.339165	0.008137	0.0016983	1.06567	0.0002916	2.66919	0.185328	0.01214	0.0034	0.0071	0.01	0.01464	0.0099	0.0085945	0.0005736	20.4064	0.237647	97.9821	0.520895	323.067	3.44903	3.61894	5.68914e-19	NM-254E	0.009459	3.5e-05	7.06132	1.0007	0.000698	7.8e-06	4e-05	2e-06	0.000273	2e-07	0.0123	0	0.008068
61411-76	CM-SS2	ARGUS VI (Obama)	2013-02-15	12.9	4	4534.23	1.11541	60.7893	0.0981276	0.7894	0.0637887	-0.0701967	0.318498	0.0033329	0.0015978	1.06567	0.0002916	2.65499	0.18475	0.01214	0.0034	0.0071	0.01	0.01464	0.0099	0.0085525	0.0005718	74.5647	0.122022	99.978	0.0363447	977.019	1.23894	3.06309	6.07893e-18	NM-254E	0.009459	3.5e-05	7.06205	1.0007	0.000698	7.8e-06	4e-05	2e-06	0.000273	2e-07	0.0123	0	0.008068
61411-77	CM-SS2	ARGUS VI (Obama)	2013-02-15	13.0333	4	39.0582	0.23135	8.71946	0.0621366	0.0379	0.0549181	0.231376	0.401648	0.000575	0.0015971	1.06567	0.0002916	2.64077	0.184182	0.01214	0.0034	0.0071	0.01	0.01464	0.0099	0.0085104	0.0005701	4.45357	0.068631	99.6003	1.48285	75.5321	1.14029	1.1727	8.71946e-19	NM-254E	0.009459	3.5e-05	7.06277	1.0007	0.000698	7.8e-06	4e-05	2e-06	0.000273	2e-07	0.0123	0	0.008068
61411-78	CM-SS2	ARGUS VI (Obama)	2013-02-15	13.15	4	122.718	0.243559	17.8861	0.0581403	0.1558	0.0786384	0.342296	0.346183	-0.0004486	0.0011517	1.06567	0.0002916	2.62676	0.183633	0.01214	0.0034	0.0071	0.01	0.01464	0.0099	0.008469	0.0005684	6.86199	0.0324858	100.129	0.397516	115.116	0.528196	0.67039	1.78861e-18	NM-254E	0.009459	3.5e-05	7.06348	1.0007	0.000698	7.8e-06	4e-05	2e-06	0.000273	2e-07	0.0123	0	0.008068
61411-79	CM-SS2	ARGUS VI (Obama)	2013-02-15	13.2833	4	121.773	0.249842	8.99255	0.0681326	0.0818	0.0766551	0.46878	0.291094	0.0019214	0.0015959	1.06567	0.0002916	2.61257	0.183088	0.01214	0.0034	0.0071	0.01	0.01464	0.0099	0.008427	0.0005667	13.4744	0.118384	99.5597	0.486858	219.591	1.81805	1.97271	8.99255e-19	NM-254E	0.009459	3.5e-05	7.0642	1.0007	0.000698	7.8e-06	4e-05	2e-06	0.000273	2e-07	0.0123	0	0.008068
61411-80	CM-SS2	ARGUS VI (Obama)	2013-02-15	13.4	4	251.62	0.293641	6.88238	0.048154	0.1661	0.0816149	0.335301	0.297987	-0.0007725	0.0016954	1.06567	0.0002916	2.59834	0.182552	0.01214	0.0034	0.0071	0.01	0.01464	0.0099	0.0083849	0.000565	36.5911	0.269838	100.104	0.260216	544.066	3.47084	3.88325	6.88238e-19	NM-254E	0.009459	3.5e-05	7.06493	1.0007	0.000698	7.8e-06	4e-05	2e-06	0.000273	2e-07	0.0123	0	0.008068
61411-81	CM-SS2	ARGUS VI (Obama)	2013-02-15	13.8167	4	91.1883	0.241458	9.2031	0.0641351	0.2067	0.0707107	0.895857	0.304963	0.0010722	0.0019982	1.06567	0.0002916	2.55068	0.180837	0.01214	0.0034	0.0071	0.01	0.01464	0.0099	0.0082439	0.0005597	9.87472	0.098127	99.7342	0.753642	163.457	1.5539	1.65812	9.2031e-19	NM-254E	0.009459	3.5e-05	7.06735	1.0007	0.000698	7.8e-06	4e-05	2e-06	0.000273	2e-07	0.0123	0	0.008068
61411-82	CM-SS2	ARGUS VI (Obama)	2013-02-15	13.9333	4	622.543	0.324704	8.46078	0.0731303	0.0744	0.0697209	-0.172036	0.325668	0.0009448	0.001593	1.06567	0.0002916	2.537	0.180368	0.01214	0.0034	0.0071	0.01	0.01464	0.0099	0.0082034	0.0005583	73.5356	0.639312	99.9523	0.106179	966.54	6.52845	7.09514	8.46078e-19	NM-254E	0.009459	3.5e-05	7.06805	1.0007	0.000698	7.8e-06	4e-05	2e-06	0.000273	2e-07	0.0123	0	0.008068
61411-83	CM-SS2	ARGUS VI (Obama)	2013-02-15	14.2667	4	39.3968	0.233662	0.551046	0.0551436	0.0722	0.0697209	-0.190464	0.325755	-0.0016501	0.0012013	1.06567	0.0002916	2.50016	0.179159	0.01214	0.0034	0.0071	0.01	0.01464	0.0099	0.0080945	0.0005545	72.3391	7.28001	101.217	1.24211	954.281	74.8407	74.8913	5.51046e-20	NM-254E	0.009459	3.5e-05	7.06992	1.0007	0.000698	7.8e-06	4e-05	2e-06	0.000273	2e-07	0.0123	0	0.008068
61411-85	CM-SS2	ARGUS VI (Obama)	2013-02-15	14.5	4	50.3999	0.220652	7.6266	0.0751296	-0.0171	0.0865794	0.272671	0.381264	0.0013626	0.0017921	1.06567	0.0002916	2.47209	0.17829	0.01214	0.0034	0.0071	0.01	0.01464	0.0099	0.0080114	0.0005518	6.54951	0.0996693	99.2269	1.22917	110.028	1.62506	1.67241	7.6266e-19	NM-254E	0.009459	3.5e-05	7.07135	1.0007	0.000698	7.8e-06	4e-05	2e-06	0.000273	2e-07	0.0123	0	0.008068
61411-86	CM-SS2	ARGUS VI (Obama)	2013-02-15	14.6333	4	199.069	0.260261	15.0694	0.0761293	0.1437	0.0786384	-0.249927	0.257234	-9.54205e-06	0.0014907	1.06567	0.0002916	2.45774	0.177864	0.01214	0.0034	0.0071	0.01	0.01464	0.0099	0.007969	0.0005505	13.2006	0.074986	99.9902	0.290177	215.381	1.15423	1.37751	1.50694e-18	NM-254E	0.009459	3.5e-05	7.07208	1.0007	0.000698	7.8e-06	4e-05	2e-06	0.000273	2e-07	0.0123	0	0.008068
61411-87	CM-SS2	ARGUS VI (Obama)	2013-02-15	14.75	4	113.802	0.245743	8.1898	0.048154	0.0046	0.0776466	-0.053329	0.305199	-0.0010836	0.0017914	1.06567	0.0002916	2.44351	0.177453	0.01214	0.0034	0.0071	0.01	0.01464	0.0099	0.0079269	0.0005492	13.9257	0.108966	100.276	0.560733	226.509	1.66711	1.84411	8.1898e-19	NM-254E	0.009459	3.5e-05	7.0728	1.0007	0.000698	7.8e-06	4e-05	2e-06	0.000273	2e-07	0.0123	0	0.008068
61411-88	CM-SS2	ARGUS VI (Obama)	2013-02-15	15.0833	4	27.1618	0.213374	1.12345	0.0581403	0.0378	0.0707107	-0.195545	0.298399	0.0004407	0.0012932	1.06567	0.0002916	2.4062	0.176433	0.01214	0.0034	0.0071	0.01	0.01464	0.0099	0.0078165	0.0005461	24.0362	1.30478	99.462	1.80307	375.003	18.4069	18.4496	1.12345e-19	NM-254E	0.009459	3.5e-05	7.0747	1.0007	0.000698	7.8e-06	4e-05	2e-06	0.000273	2e-07	0.0123	0	0.008068
61411-89	CM-SS2	ARGUS VI (Obama)	2013-02-15	15.2	4	17.7899	0.224945	1.08362	0.0451599	0.0221	0.0657647	-0.228112	0.353701	-0.0006082	0.001178	1.06567	0.0002916	2.39207	0.176069	0.01214	0.0034	0.0071	0.01	0.01464	0.0099	0.0077747	0.000545	16.5572	0.790832	100.917	2.67481	266.332	11.8389	11.8743	1.08362e-19	NM-254E	0.009459	3.5e-05	7.07543	1.0007	0.000698	7.8e-06	4e-05	2e-06	0.000273	2e-07	0.0123	0	0.008068
61411-90	CM-SS2	ARGUS VI (Obama)	2013-02-15	15.3333	4	95.9132	0.224667	8.4752	0.0611375	-0.0627	0.0687314	-0.107133	0.353737	0.0018942	0.0016885	1.06567	0.0002916	2.37781	0.175713	0.01214	0.0034	0.0071	0.01	0.01464	0.0099	0.0077325	0.0005439	11.2402	0.104049	99.3936	0.621103	184.953	1.62843	1.75371	8.4752e-19	NM-254E	0.009459	3.5e-05	7.07615	1.0007	0.000698	7.8e-06	4e-05	2e-06	0.000273	2e-07	0.0123	0	0.008068
61411-91	CM-SS2	ARGUS VI (Obama)	2013-02-15	15.45	4	132.301	0.230773	8.10754	0.07413	0.1667	0.0588558	-0.315204	0.29849	0.000713	0.0017894	1.06567	0.0002916	2.36375	0.175375	0.01214	0.0034	0.0071	0.01	0.01464	0.0099	0.0076909	0.0005428	16.2808	0.165317	99.8223	0.473038	262.19	2.48042	2.63998	8.10754e-19	NM-254E	0.009459	3.5e-05	7.07687	1.0007	0.000698	7.8e-06	4e-05	2e-06	0.000273	2e-07	0.0123	0	0.008068
61411-92	CM-SS2	ARGUS VI (Obama)	2013-02-15	15.5667	4	1280.45	0.492184	15.2654	0.0691321	0.198	0.0539351	0.216998	0.346874	0.0037613	0.0015873	1.06567	0.0002916	2.35009	0.175058	0.01214	0.0034	0.0071	0.01	0.01464	0.0099	0.0076505	0.0005418	83.7994	0.382181	99.9139	0.0657491	1068.46	3.69135	4.75346	1.52654e-18	NM-254E	0.009459	3.5e-05	7.07756	1.0007	0.000698	7.8e-06	4e-05	2e-06	0.000273	2e-07	0.0123	0	0.008068
61411-93	CM-SS2	ARGUS VI (Obama)	2013-02-15	16.1667	4	57.4945	0.216929	7.86947	0.0601384	0.0354	0.0776466	0.609391	0.347042	0.00066	0.0015858	1.06567	0.0002916	2.28255	0.173661	0.01214	0.0034	0.0071	0.01	0.01464	0.0099	0.0074507	0.0005375	7.27927	0.0865081	99.7388	0.981932	121.888	1.40137	1.46772	7.86947e-19	NM-254E	0.009459	3.5e-05	7.08101	1.0007	0.000698	7.8e-06	4e-05	2e-06	0.000273	2e-07	0.0123	0	0.008068
61411-94	CM-SS2	ARGUS VI (Obama)	2013-02-15	16.2833	4	666.802	0.355202	6.29897	0.0641352	0.0299	0.0628013	-0.076766	0.312481	0.0037526	0.0014857	1.06567	0.0002916	2.26832	0.173404	0.01214	0.0034	0.0071	0.01	0.01464	0.0099	0.0074086	0.0005367	105.671	1.0798	99.831	0.100454	1268.38	9.35032	9.94445	6.29897e-19	NM-254E	0.009459	3.5e-05	7.08173	1.0007	0.000698	7.8e-06	4e-05	2e-06	0.000273	2e-07	0.0123	0	0.008068
61411-95	CM-SS2	ARGUS VI (Obama)	2013-02-15	16.4167	4	239.104	0.176091	61.4839	0.0124811	0.7897	0.0180278	0.122243	0.110179	0.0005397	0.000585	1.06567	0.0002916	2.2541	0.173159	0.01214	0.0034	0.0071	0.01	0.01464	0.0099	0.0073665	0.0005359	3.87839	0.00411	99.9374	0.127453	65.9506	0.0686452	0.249321	6.14839e-18	NM-254E	0.009459	3.5e-05	7.08246	1.0007	0.000698	7.8e-06	4e-05	2e-06	0.000273	2e-07	0.0123	0	0.008068
61411-96	CM-SS2	ARGUS VI (Obama)	2013-02-15	16.6667	4	97.516	0.210284	8.07932	0.0661339	0.0518	0.0717008	0.137146	0.347189	0.0082298	0.0012883	1.06567	0.0002916	2.22397	0.172683	0.01214	0.0034	0.0071	0.01	0.01464	0.0099	0.0072774	0.0005345	11.7594	0.11059	97.4924	0.496885	193.062	1.72316	1.85174	8.07932e-19	NM-254E	0.009459	3.5e-05	7.08399	1.0007	0.000698	7.8e-06	4e-05	2e-06	0.000273	2e-07	0.0123	0	0.008068
61411-97	CM-SS2	ARGUS VI (Obama)	2013-02-15	16.8	4	92.299	0.256603	9.73018	0.0601384	0.046	0.0736817	-0.084592	0.34029	0.0043341	0.0016853	1.06567	0.0002916	2.20894	0.172468	0.01214	0.0034	0.0071	0.01	0.01464	0.0099	0.007233	0.0005338	9.34392	0.0819178	98.5882	0.670953	155.032	1.3032	1.41451	9.73018e-19	NM-254E	0.009459	3.5e-05	7.08476	1.0007	0.000698	7.8e-06	4e-05	2e-06	0.000273	2e-07	0.0123	0	0.008068
61411-98	CM-SS2	ARGUS VI (Obama)	2013-02-15	16.9333	4	144.016	0.271624	6.45909	0.0631359	0.1141	0.0687314	0.212281	0.333395	0.0020452	0.0015844	1.06567	0.0002916	2.19472	0.172278	0.01214	0.0034	0.0071	0.01	0.01464	0.0099	0.0071909	0.0005332	22.1977	0.232928	99.5898	0.42288	348.882	3.3332	3.53436	6.45909e-19	NM-254E	0.009459	3.5e-05	7.08548	1.0007	0.000698	7.8e-06	4e-05	2e-06	0.000273	2e-07	0.0123	0	0.008068
61411-99	CM-SS2	ARGUS VI (Obama)	2013-02-15	17.2667	4	211.902	0.287104	3.477	0.0431645	-0.1019	0.0707107	-0.0718662	0.347355	-0.0002237	0.001385	1.06567	0.0002916	2.15722	0.171839	0.01214	0.0034	0.0071	0.01	0.01464	0.0099	0.0070799	0.0005319	60.9505	0.770544	100.025	0.273612	833.29	8.46271	8.81774	3.477e-19	NM-254E	0.009459	3.5e-05	7.0874	1.0007	0.000698	7.8e-06	4e-05	2e-06	0.000273	2e-07	0.0123	0	0.008068
61411-100	CM-SS2	ARGUS VI (Obama)	2013-02-15	17.3833	4	154.393	0.256088	5.43467	0.0701317	0.0961	0.0717008	0.241421	0.333518	-0.0049418	0.0011908	1.06567	0.0002916	2.14347	0.171701	0.01214	0.0034	0.0071	0.01	0.01464	0.0099	0.0070393	0.0005314	28.6767	0.378891	100.968	0.329799	439.324	5.16055	5.3591	5.43467e-19	NM-254E	0.009459	3.5e-05	7.0881	1.0007	0.000698	7.8e-06	4e-05	2e-06	0.000273	2e-07	0.0123	0	0.008068
61411-101	CM-SS2	ARGUS VI (Obama)	2013-02-15	17.5	4	235.531	0.286946	14.1676	0.0861276	0.121	0.0726911	0.145746	0.305889	-0.0002691	0.0011621	1.06567	0.0002916	2.12969	0.171575	0.01214	0.0034	0.0071	0.01	0.01464	0.0099	0.0069985	0.000531	16.623	0.105994	100.038	0.226895	267.317	1.58589	1.83357	1.41676e-18	NM-254E	0.009459	3.5e-05	7.0888	1.0007	0.000698	7.8e-06	4e-05	2e-06	0.000273	2e-07	0.0123	0	0.008068
61411-102	CM-SS2	ARGUS VI (Obama)	2013-02-15	17.6167	4	71.334	0.23452	6.1949	0.0591393	0.0214	0.0687314	0.192551	0.299023	-0.0011913	0.0013846	1.06567	0.0002916	2.11597	0.171463	0.01214	0.0034	0.0071	0.01	0.01464	0.0099	0.0069579	0.0005307	11.5665	0.134535	100.516	0.74419	190.054	2.09971	2.20339	6.1949e-19	NM-254E	0.009459	3.5e-05	7.0895	1.0007	0.000698	7.8e-06	4e-05	2e-06	0.000273	2e-07	0.0123	0	0.008068
61411-103	CM-SS2	ARGUS VI (Obama)	2013-02-15	17.9333	4	75.676	0.188994	19.5097	0.0124811	0.2536	0.0214709	-0.0045385	0.104944	0.0039506	0.0006189	1.06567	0.0002916	2.08012	0.171227	0.01214	0.0034	0.0071	0.01	0.01464	0.0099	0.0068519	0.00053	3.81048	0.0137624	98.4414	0.427918	64.816	0.230001	0.329278	1.95097e-18	NM-254E	0.009459	3.5e-05	7.09133	1.0007	0.000698	7.8e-06	4e-05	2e-06	0.000273	2e-07	0.0123	0	0.008068
61411-104	CM-SS2	ARGUS VI (Obama)	2013-02-15	18.2	4	22.074	0.227537	5.09013	0.0541449	0.0247	0.0726911	0.0004256	0.354573	0.0024802	0.0014831	1.06567	0.0002916	2.04995	0.171094	0.01214	0.0034	0.0071	0.01	0.01464	0.0099	0.0067626	0.0005296	4.18301	0.107522	96.6373	2.47063	71.0313	1.79086	1.80932	5.09013e-19	NM-254E	0.009459	3.5e-05	7.09287	1.0007	0.000698	7.8e-06	4e-05	2e-06	0.000273	2e-07	0.0123	0	0.008068
61411-105	CM-SS2	ARGUS VI (Obama)	2013-02-15	18.5833	4	515.736	0.345317	5.88119	0.0581403	-0.0069	0.0667533	0.0068113	0.333849	0.0004354	0.0011899	1.06567	0.0002916	2.00559	0.171008	0.01214	0.0034	0.0071	0.01	0.01464	0.0099	0.0066314	0.0005293	87.662	0.870811	99.9742	0.11714	1105.39	8.24286	8.79613	5.88118e-19	NM-254E	0.009459	3.5e-05	7.09514	1.0007	0.000698	7.8e-06	4e-05	2e-06	0.000273	2e-07	0.0123	0	0.008068
61411-106	CM-SS2	ARGUS VI (Obama)	2013-02-15	18.7	4	176.044	0.255624	5.95384	0.0581404	-0.0735	0.0806226	-0.125171	0.340823	0.0009165	0.001384	1.06567	0.0002916	1.99159	0.171008	0.01214	0.0034	0.0071	0.01	0.01464	0.0099	0.00659	0.0005293	29.511	0.299618	99.835	0.311922	450.652	4.05566	4.31661	5.95384e-19	NM-254E	0.009459	3.5e-05	7.09585	1.0007	0.000698	7.8e-06	4e-05	2e-06	0.000273	2e-07	0.0123	0	0.008068
61411-107	CM-SS2	ARGUS VI (Obama)	2013-02-15	18.8333	4	80.0211	0.241139	5.81144	0.0521476	0.0988	0.0766551	0.0096513	0.347804	-0.0011663	0.0011899	1.06567	0.0002916	1.9779	0.17102	0.01214	0.0034	0.0071	0.01	0.01464	0.0099	0.0065495	0.0005293	13.8217	0.144488	100.437	0.616844	224.917	2.2125	2.347	5.81144e-19	NM-254E	0.009459	3.5e-05	7.09655	1.0007	0.000698	7.8e-06	4e-05	2e-06	0.000273	2e-07	0.0123	0	0.008068
61411-108	CM-SS2	ARGUS VI (Obama)	2013-02-15	18.95	4	347.695	0.311218	3.1947	0.0531462	0.0183	0.0726911	0.167211	0.333949	0.0013756	0.0015831	1.06567	0.0002916	1.96428	0.171045	0.01214	0.0034	0.0071	0.01	0.01464	0.0099	0.0065092	0.0005294	108.706	1.81733	99.8857	0.185697	1294.48	15.514	15.8895	3.1947e-19	NM-254E	0.009459	3.5e-05	7.09725	1.0007	0.000698	7.8e-06	4e-05	2e-06	0.000273	2e-07	0.0123	0	0.008068
61411-110	CM-SS2	ARGUS VI (Obama)	2013-02-15	19.1833	4	31.3433	0.227567	5.02599	0.0541449	-0.1165	0.0667533	0.301409	0.258201	-0.0004982	0.0012864	1.06567	0.0002916	1.93669	0.171133	0.01214	0.0034	0.0071	0.01	0.01464	0.0099	0.0064275	0.0005297	6.26117	0.111583	100.525	1.60216	105.321	1.824	1.86289	5.02599e-19	NM-254E	0.009459	3.5e-05	7.09866	1.0007	0.000698	7.8e-06	4e-05	2e-06	0.000273	2e-07	0.0123	0	0.008068
61411-111	CM-SS2	ARGUS VI (Obama)	2013-02-15	19.3	4	212.02	0.241263	8.92332	0.0661339	0.1378	0.0598415	0.464724	0.368826	-0.0001884	0.0013842	1.06567	0.0002916	1.92291	0.171196	0.01214	0.0034	0.0071	0.01	0.01464	0.0099	0.0063868	0.0005299	23.7637	0.184197	100.045	0.253003	371.155	2.60398	2.88546	8.92332e-19	NM-254E	0.009459	3.5e-05	7.09936	1.0007	0.000698	7.8e-06	4e-05	2e-06	0.000273	2e-07	0.0123	0	0.008068
61411-112	CM-SS2	ARGUS VI (Obama)	2013-02-15	19.8167	4	71.6641	0.227923	3.77271	0.0661339	0.1395	0.0717008	-0.625293	0.362013	-9.82e-05	0.001287	1.06567	0.0002916	1.86387	0.171607	0.01214	0.0034	0.0071	0.01	0.01464	0.0099	0.0062121	0.0005311	18.9806	0.353332	99.976	0.700565	302.256	5.18662	5.28809	3.77271e-19	NM-254E	0.009459	3.5e-05	7.10238	1.0007	0.000698	7.8e-06	4e-05	2e-06	0.000273	2e-07	0.0123	0	0.008068
61411-113	CM-SS2	ARGUS VI (Obama)	2013-02-15	19.95	4	36.4359	0.234719	1.42936	0.0581404	-0.0765	0.0786384	-0.0393511	0.313423	-0.0003714	0.0010411	1.06567	0.0002916	1.85013	0.171736	0.01214	0.0034	0.0071	0.01	0.01464	0.0099	0.0061715	0.0005315	25.5545	1.07503	100.283	1.25036	396.297	14.9904	15.0482	1.42936e-19	NM-254E	0.009459	3.5e-05	7.10308	1.0007	0.000698	7.8e-06	4e-05	2e-06	0.000273	2e-07	0.0123	0	0.008068
61411-114	CM-SS2	ARGUS VI (Obama)	2013-02-15	20.0667	4	837.626	0.426194	11.1581	0.0701317	0.1904	0.0776466	0.181573	0.320381	-0.0017381	0.0021967	1.06567	0.0002916	1.83644	0.171876	0.01214	0.0034	0.0071	0.01	0.01464	0.0099	0.006131	0.000532	75.1097	0.477323	100.064	0.106309	982.544	4.83184	5.59119	1.11581e-18	NM-254E	0.009459	3.5e-05	7.10378	1.0007	0.000698	7.8e-06	4e-05	2e-06	0.000273	2e-07	0.0123	0	0.008068
61411-115	CM-SS2	ARGUS VI (Obama)	2013-02-15	20.1833	4	8.66628	0.215625	1.73578	0.0561425	-0.0986	0.0707107	0.004689	0.313485	-0.0005333	0.0013852	1.06567	0.0002916	1.82272	0.172029	0.01214	0.0034	0.0071	0.01	0.01464	0.0099	0.0060904	0.0005324	5.07315	0.315036	101.775	5.95782	85.7974	5.20497	5.2142	1.73578e-19	NM-254E	0.009459	3.5e-05	7.10448	1.0007	0.000698	7.8e-06	4e-05	2e-06	0.000273	2e-07	0.0123	0	0.008068
61411-116	CM-SS2	ARGUS VI (Obama)	2013-02-15	20.3	4	114.353	0.241973	8.84857	0.0611376	-0.004	0.0855862	1.42573	0.313516	0.0014803	0.0011915	1.06567	0.0002916	1.80903	0.172194	0.01214	0.0034	0.0071	0.01	0.01464	0.0099	0.0060499	0.000533	12.8794	0.10149	99.7108	0.431804	210.429	1.56644	1.73054	8.84857e-19	NM-254E	0.009459	3.5e-05	7.10518	1.0007	0.000698	7.8e-06	4e-05	2e-06	0.000273	2e-07	0.0123	0	0.008068
61411-117	CM-SS2	ARGUS VI (Obama)	2013-02-15	20.7	4	53.1623	0.235507	6.68225	0.063136	0.0953	0.0796304	-0.193607	0.313616	0.0017063	0.0013862	1.06567	0.0002916	1.76474	0.172811	0.01214	0.0034	0.0071	0.01	0.01464	0.0099	0.0059189	0.0005349	7.86916	0.103055	99.0141	0.998398	131.419	1.66074	1.72576	6.68225e-19	NM-254E	0.009459	3.5e-05	7.10745	1.0007	0.000698	7.8e-06	4e-05	2e-06	0.000273	2e-07	0.0123	0	0.008068
61411-118	CM-SS2	ARGUS VI (Obama)	2013-02-15	20.8167	4	51.8109	0.210566	7.1808	0.0671333	0.0592	0.0855862	0.179552	0.376263	-0.0017461	0.0013864	1.06567	0.0002916	1.75108	0.173026	0.01214	0.0034	0.0071	0.01	0.01464	0.0099	0.0058785	0.0005355	7.28156	0.0940045	101.031	0.987635	121.925	1.52277	1.58408	7.1808e-19	NM-254E	0.009459	3.5e-05	7.10815	1.0007	0.000698	7.8e-06	4e-05	2e-06	0.000273	2e-07	0.0123	0	0.008068
61411-119	CM-SS2	ARGUS VI (Obama)	2013-02-15	20.9333	4	69.2097	0.235835	8.48241	0.0551437	0.0853	0.0786384	0.618186	0.362343	-0.0006688	0.0016861	1.06567	0.0002916	1.73727	0.173257	0.01214	0.0034	0.0071	0.01	0.01464	0.0099	0.0058376	0.0005362	8.18087	0.0844456	100.36	0.873778	136.436	1.35713	1.44169	8.48241e-19	NM-254E	0.009459	3.5e-05	7.10886	1.0007	0.000698	7.8e-06	4e-05	2e-06	0.000273	2e-07	0.0123	0	0.008068
61411-120	CM-SS2	ARGUS VI (Obama)	2013-02-15	21.05	4	521.202	0.355249	7.37574	0.0611376	0.1846	0.0608276	0.567769	0.313709	0.0021144	0.0010899	1.06567	0.0002916	1.72352	0.173498	0.01214	0.0034	0.0071	0.01	0.01464	0.0099	0.0057969	0.000537	70.5816	0.58881	99.8888	0.114857	936.124	6.11349	6.68787	7.37574e-19	NM-254E	0.009459	3.5e-05	7.10956	1.0007	0.000698	7.8e-06	4e-05	2e-06	0.000273	2e-07	0.0123	0	0.008068
61411-121	CM-SS2	ARGUS VI (Obama)	2013-02-15	21.1667	4	661.892	0.329529	8.29538	0.0651346	-0.0386	0.0726911	0.510232	0.299899	0.000121	0.0012897	1.06567	0.0002916	1.70984	0.17375	0.01214	0.0034	0.0071	0.01	0.01464	0.0099	0.0057565	0.0005378	79.7856	0.629549	99.9998	0.0913492	1029.28	6.21216	6.86129	8.29538e-19	NM-254E	0.009459	3.5e-05	7.11026	1.0007	0.000698	7.8e-06	4e-05	2e-06	0.000273	2e-07	0.0123	0	0.008068
61411-122	CM-SS2	ARGUS VI (Obama)	2013-02-15	21.4833	4	114.326	0.223694	7.98707	0.063136	-0.0129	0.0726911	0.369545	0.334647	0.000425	0.0011474	1.06567	0.0002916	1.67392	0.174468	0.01214	0.0034	0.0071	0.01	0.01464	0.0099	0.0056502	0.00054	14.2935	0.124156	99.9108	0.408312	232.127	1.89368	2.05834	7.98707e-19	NM-254E	0.009459	3.5e-05	7.1121	1.0007	0.000698	7.8e-06	4e-05	2e-06	0.000273	2e-07	0.0123	0	0.008068
61411-123	CM-SS2	ARGUS VI (Obama)	2013-02-15	21.8167	4	48.1751	0.206968	3.37033	0.0521477	-0.0596	0.0717008	1.00351	0.327788	-0.0008383	0.0011206	1.06567	0.0002916	1.63588	0.175316	0.01214	0.0034	0.0071	0.01	0.01464	0.0099	0.0055377	0.0005426	14.3857	0.251591	100.678	0.925326	233.533	3.83445	3.91933	3.37033e-19	NM-254E	0.009459	3.5e-05	7.11405	1.0007	0.000698	7.8e-06	4e-05	2e-06	0.000273	2e-07	0.0123	0	0.008068
61411-124	CM-SS2	ARGUS VI (Obama)	2013-02-15	21.9333	4	40.9169	0.218521	6.11646	0.0781289	0.2228	0.0657647	-0.173173	0.341731	0.0070048	0.0017896	1.06567	0.0002916	1.6221	0.175646	0.01214	0.0034	0.0071	0.01	0.01464	0.0099	0.0054969	0.0005436	6.33901	0.124405	94.8749	1.50035	106.593	2.03218	2.06798	6.11646e-19	NM-254E	0.009459	3.5e-05	7.11475	1.0007	0.000698	7.8e-06	4e-05	2e-06	0.000273	2e-07	0.0123	0	0.008068
61411-125	CM-SS2	ARGUS VI (Obama)	2013-02-15	22.0667	4	44.304	0.202414	10.316	0.0681328	0.2587	0.0796304	0.196102	0.327853	0.0024979	0.0016888	1.06567	0.0002916	1.60829	0.175988	0.01214	0.0034	0.0071	0.01	0.01464	0.0099	0.005456	0.0005447	4.21667	0.0595917	98.367	1.30813	71.5918	0.992234	1.02568	1.0316e-18	NM-254E	0.009459	3.5e-05	7.11546	1.0007	0.000698	7.8e-06	4e-05	2e-06	0.000273	2e-07	0.0123	0	0.008068
61411-126	CM-SS2	ARGUS VI (Obama)	2013-02-15	22.1833	4	41.4215	0.244941	3.57617	0.0701318	0.1037	0.0756637	-0.726133	0.279441	0.0017208	0.0013904	1.06567	0.0002916	1.59451	0.17634	0.01214	0.0034	0.0071	0.01	0.01464	0.0099	0.0054153	0.0005458	11.4138	0.261389	98.6253	1.30228	187.669	4.08486	4.13783	3.57617e-19	NM-254E	0.009459	3.5e-05	7.11616	1.0007	0.000698	7.8e-06	4e-05	2e-06	0.000273	2e-07	0.0123	0	0.008068
61411-127	CM-SS2	ARGUS VI (Obama)	2013-02-15	22.3	4	28.0993	0.225443	3.60019	0.0601385	0.0713	0.0717008	-0.168955	0.314032	0.0001657	0.0012935	1.06567	0.0002916	1.58072	0.176704	0.01214	0.0034	0.0071	0.01	0.01464	0.0099	0.0053745	0.0005469	7.77945	0.179908	99.7797	1.78371	129.973	2.90153	2.93844	3.60019e-19	NM-254E	0.009459	3.5e-05	7.11687	1.0007	0.000698	7.8e-06	4e-05	2e-06	0.000273	2e-07	0.0123	0	0.008068
61411-128	CM-SS2	ARGUS VI (Obama)	2013-02-15	22.4167	4	61.363	0.238656	2.74909	0.0641353	0.0174	0.0746726	0.241001	0.390755	-3.11946e-06	0.0011139	1.06567	0.0002916	1.56701	0.177078	0.01214	0.0034	0.0071	0.01	0.01464	0.0099	0.0053339	0.0005481	22.3217	0.54198	100.032	0.773583	350.655	7.74824	7.8377	2.74909e-19	NM-254E	0.009459	3.5e-05	7.11757	1.0007	0.000698	7.8e-06	4e-05	2e-06	0.000273	2e-07	0.0123	0	0.008068
61411-129	CM-SS2	ARGUS VI (Obama)	2013-02-15	22.8167	4	309.577	0.307108	6.29388	0.0411697	-0.0162	0.0865794	-0.160482	0.341976	0.0009249	0.0012957	1.06567	0.0002916	1.52246	0.178369	0.01214	0.0034	0.0071	0.01	0.01464	0.0099	0.0052021	0.0005521	49.1315	0.330912	99.9053	0.187925	698.654	3.91171	4.46315	6.29388e-19	NM-254E	0.009459	3.5e-05	7.11986	1.0007	0.000698	7.8e-06	4e-05	2e-06	0.000273	2e-07	0.0123	0	0.008068
61411-130	CM-SS2	ARGUS VI (Obama)	2013-02-15	22.9333	4	155.987	0.239931	4.59028	0.0521477	0.062	0.0687314	0.394195	0.30726	0.0022238	0.0011444	1.06567	0.0002916	1.50864	0.178793	0.01214	0.0034	0.0071	0.01	0.01464	0.0099	0.0051613	0.0005534	33.8387	0.395193	99.5958	0.308604	508.315	5.18349	5.43744	4.59028e-19	NM-254E	0.009459	3.5e-05	7.12057	1.0007	0.000698	7.8e-06	4e-05	2e-06	0.000273	2e-07	0.0123	0	0.008068
61411-131	CM-SS2	ARGUS VI (Obama)	2013-02-15	23.25	4	885.192	0.456928	8.82396	0.0641353	0.0088	0.0726911	-0.158403	0.265926	-0.0011556	0.0013948	1.06567	0.0002916	1.47251	0.179954	0.01214	0.0034	0.0071	0.01	0.01464	0.0099	0.0050544	0.000557	100.345	0.732756	100.037	0.0868533	1221.67	6.50917	7.29711	8.82396e-19	NM-254E	0.009459	3.5e-05	7.12242	1.0007	0.000698	7.8e-06	4e-05	2e-06	0.000273	2e-07	0.0123	0	0.008068
61411-132	CM-SS2	ARGUS VI (Obama)	2013-02-15	23.3667	4	101.212	0.247892	10.9746	0.0441622	0.1511	0.0826075	0.17067	0.328206	0.0023087	0.0016932	1.06567	0.0002916	1.45873	0.180417	0.01214	0.0034	0.0071	0.01	0.01464	0.0099	0.0050136	0.0005584	9.15311	0.0631711	99.3341	0.607531	151.994	1.00663	1.14218	1.09746e-18	NM-254E	0.009459	3.5e-05	7.12312	1.0007	0.000698	7.8e-06	4e-05	2e-06	0.000273	2e-07	0.0123	0	0.008068
61411-133	CM-SS2	ARGUS VI (Obama)	2013-02-15	23.4833	4	123.157	0.248235	14.1504	0.0601385	0.0937	0.0796304	0.330261	0.286641	0.0048776	0.0014942	1.06567	0.0002916	1.44501	0.180888	0.01214	0.0034	0.0071	0.01	0.01464	0.0099	0.004973	0.0005599	8.5944	0.0513627	98.8374	0.460223	143.07	0.822467	0.967347	1.41504e-18	NM-254E	0.009459	3.5e-05	7.12383	1.0007	0.000698	7.8e-06	4e-05	2e-06	0.000273	2e-07	0.0123	0	0.008068
61411-134	CM-SS2	ARGUS VI (Obama)	2013-02-15	23.6167	4	50.2049	0.183367	12.8811	0.0097213	0.1885	0.0223607	0.133656	0.110834	0.0024324	0.0006043	1.06567	0.0002916	1.43132	0.181368	0.01214	0.0034	0.0071	0.01	0.01464	0.0099	0.0049325	0.0005614	3.8342	0.020176	98.5778	0.627431	65.2123	0.337115	0.412115	1.28811e-18	NM-254E	0.009459	3.5e-05	7.12453	1.0007	0.000698	7.8e-06	4e-05	2e-06	0.000273	2e-07	0.0123	0	0.008068
61411-135	CM-SS2	ARGUS VI (Obama)	2013-02-16	0.0666667	4	69.309	0.230679	13.2848	0.0521477	0.0393	0.0816149	0.0659985	0.335361	0.0035509	0.0010689	1.06567	0.0002916	1.37804	0.183338	0.01214	0.0034	0.0071	0.01	0.01464	0.0099	0.0047749	0.0005675	5.12941	0.0358876	98.47	0.657517	86.7267	0.592627	0.670403	1.32848e-18	NM-254E	0.009459	3.5e-05	7.12726	1.0007	0.000698	7.8e-06	4e-05	2e-06	0.000273	2e-07	0.0123	0	0.008068
61411-136	CM-SS2	ARGUS VI (Obama)	2013-02-16	0.2	4	19.9377	0.237294	4.78442	0.066134	0.1289	0.0667533	-0.14926	0.356328	-0.0003029	0.0013031	1.06567	0.0002916	1.36429	0.183871	0.01214	0.0034	0.0071	0.01	0.01464	0.0099	0.0047342	0.0005691	4.17608	0.111504	100.409	2.58564	70.9159	1.85728	1.87503	4.78442e-19	NM-254E	0.009459	3.5e-05	7.12797	1.0007	0.000698	7.8e-06	4e-05	2e-06	0.000273	2e-07	0.0123	0	0.008068
61411-137	CM-SS2	ARGUS VI (Obama)	2013-02-16	0.316667	4	107.272	0.257699	8.84258	0.0611377	0.1688	0.0955249	0.543633	0.335427	-0.0018698	0.0011808	1.06567	0.0002916	1.35054	0.184414	0.01214	0.0034	0.0071	0.01	0.01464	0.0099	0.0046936	0.0005708	12.192	0.0977834	100.564	0.473972	199.79	1.51802	1.67179	8.84258e-19	NM-254E	0.009459	3.5e-05	7.12867	1.0007	0.000698	7.8e-06	4e-05	2e-06	0.000273	2e-07	0.0123	0	0.008068
61411-138	CM-SS2	ARGUS VI (Obama)	2013-02-16	0.433333	4	46.3414	0.186394	12.1214	0.009909	0.1194	0.0223607	0.0524723	0.105508	-0.0001638	0.0006038	1.06567	0.0002916	1.33673	0.18497	0.01214	0.0034	0.0071	0.01	0.01464	0.0099	0.0046527	0.0005725	3.81932	0.0216139	100.112	0.690688	64.9637	0.361188	0.431543	1.21214e-18	NM-254E	0.009459	3.5e-05	7.12938	1.0007	0.000698	7.8e-06	4e-05	2e-06	0.000273	2e-07	0.0123	0	0.008068
61411-139	CM-SS2	ARGUS VI (Obama)	2013-02-16	0.7	4	772.875	0.396455	9.57809	0.0631361	0.0225	0.0925419	-0.485188	0.398504	0.0001752	0.0012115	1.06567	0.0002916	1.30659	0.186217	0.01214	0.0034	0.0071	0.01	0.01464	0.0099	0.0045635	0.0005764	80.671	0.534768	99.9875	0.0863928	1037.99	5.25183	6.01458	9.5781e-19	NM-254E	0.009459	3.5e-05	7.13093	1.0007	0.000698	7.8e-06	4e-05	2e-06	0.000273	2e-07	0.0123	0	0.008068
61411-140	CM-SS2	ARGUS VI (Obama)	2013-02-16	0.816667	4	30.9616	0.188889	7.19555	0.0096276	0.0666	0.0214709	-0.103409	0.100353	0.0061096	0.000628	1.06567	0.0002916	1.29284	0.186802	0.01214	0.0034	0.0071	0.01	0.01464	0.0099	0.0045229	0.0005782	4.04042	0.0373668	94.0777	1.03522	68.6547	0.623176	0.671203	7.19555e-19	NM-254E	0.009459	3.5e-05	7.13164	1.0007	0.000698	7.8e-06	4e-05	2e-06	0.000273	2e-07	0.0123	0	0.008068
61411-141	CM-SS2	ARGUS VI (Obama)	2013-02-16	1.55	4	39.981	0.225166	3.07342	0.066134	0.1394	0.0855862	0.0104184	0.349732	0.0243529	0.0020068	1.06567	0.0002916	1.21	0.190525	0.01214	0.0034	0.0071	0.01	0.01464	0.0099	0.0042778	0.0005897	10.6411	0.309599	81.8509	1.66608	175.553	4.87037	4.9096	3.07342e-19	NM-254E	0.009459	3.5e-05	7.13589	1.0007	0.000698	7.8e-06	4e-05	2e-06	0.000273	2e-07	0.0123	0	0.008068
61411-142	CM-SS2	ARGUS VI (Obama)	2013-02-16	1.66667	4	45.2557	0.231187	3.31739	0.066134	0.178	0.0687314	0.200966	0.328827	0.0015695	0.0010999	1.06567	0.0002916	1.19628	0.191174	0.01214	0.0034	0.0071	0.01	0.01464	0.0099	0.0042372	0.0005917	13.5004	0.295357	99.0165	1.02282	219.989	4.5349	4.5993	3.31739e-19	NM-254E	0.009459	3.5e-05	7.13659	1.0007	0.000698	7.8e-06	4e-05	2e-06	0.000273	2e-07	0.0123	0	0.008068
61411-143	CM-SS2	ARGUS VI (Obama)	2013-02-16	1.78333	4	98.8045	0.226274	3.36183	0.054145	0.0394	0.0746726	0.208124	0.294106	0.0005429	0.0011829	1.06567	0.0002916	1.18253	0.191833	0.01214	0.0034	0.0071	0.01	0.01464	0.0099	0.0041965	0.0005937	29.3402	0.488938	99.8533	0.482442	448.339	6.62669	6.78808	3.36183e-19	NM-254E	0.009459	3.5e-05	7.1373	1.0007	0.000698	7.8e-06	4e-05	2e-06	0.000273	2e-07	0.0123	0	0.008068
61411-144	CM-SS2	ARGUS VI (Obama)	2013-02-16	1.9	4	22.0243	0.221716	4.57158	0.066134	0.0431	0.0717008	0.744209	0.370834	-6.47e-05	0.0011655	1.06567	0.0002916	1.16872	0.192504	0.01214	0.0034	0.0071	0.01	0.01464	0.0099	0.0041557	0.0005958	4.82746	0.114325	100.36	2.13438	81.7336	1.89305	1.91602	4.57158e-19	NM-254E	0.009459	3.5e-05	7.13801	1.0007	0.000698	7.8e-06	4e-05	2e-06	0.000273	2e-07	0.0123	0	0.008068
61411-145	CM-SS2	ARGUS VI (Obama)	2013-02-16	2.03333	4	286.525	0.32391	10.3974	0.0531463	0.1282	0.0875728	0.0661045	0.3359	-0.0001334	0.0013159	1.06567	0.0002916	1.15503	0.193178	0.01214	0.0034	0.0071	0.01	0.01464	0.0099	0.0041152	0.0005979	27.5538	0.149174	100.016	0.210749	423.966	2.04889	2.48171	1.03974e-18	NM-254E	0.009459	3.5e-05	7.13871	1.0007	0.000698	7.8e-06	4e-05	2e-06	0.000273	2e-07	0.0123	0	0.008068
61411-146	CM-SS2	ARGUS VI (Obama)	2013-02-16	2.15	4	78.6397	0.245119	4.88039	0.0531463	0.0085	0.0746726	0.249594	0.280354	0.0008488	0.0010513	1.06567	0.0002916	1.14128	0.193864	0.01214	0.0034	0.0071	0.01	0.01464	0.0099	0.0040745	0.0006	16.0577	0.193094	99.7009	0.594688	258.84	2.9025	3.0368	4.88039e-19	NM-254E	0.009459	3.5e-05	7.13942	1.0007	0.000698	7.8e-06	4e-05	2e-06	0.000273	2e-07	0.0123	0	0.008068
61411-147	CM-SS2	ARGUS VI (Obama)	2013-02-16	2.46667	4	133.445	0.179622	24.8261	0.0770788	0.2922	0.0941116	0.62558	0.331975	0.0019832	0.0012993	1.06567	0.0002916	1.2679	0.058	0.0455647	0.012521	-0.0152	0.024	0.0132	0.015	0.004279	0.00023	5.34544	0.0239435	99.5942	0.347955	90.2905	0.394621	0.511852	2.48261e-18	NM-254E	0.009459	3.5e-05	7.14132	1.0007	0.000698	7.8e-06	4e-05	2e-06	0.000273	2e-07	0.0123	0	0.008068
61411-148	CM-SS2	ARGUS VI (Obama)	2013-02-16	2.58333	4	212.86	0.2372	19.0908	0.0701692	0.1836	0.0864002	-0.0135698	0.305107	0.0025214	0.0009759	1.06567	0.0002916	1.2679	0.058	0.0452595	0.0124815	-0.0152	0.024	0.0132	0.015	0.004279	0.00023	11.1023	0.0453471	99.6451	0.208854	182.794	0.71055	0.958762	1.90908e-18	NM-254E	0.009459	3.5e-05	7.14203	1.0007	0.000698	7.8e-06	4e-05	2e-06	0.000273	2e-07	0.0123	0	0.008068
61411-149	CM-SS2	ARGUS VI (Obama)	2013-02-16	2.71667	4	55.3761	0.170188	12.196	0.0642621	0.0913	0.0816088	0.392136	0.338809	0.0005137	0.0010278	1.06567	0.0002916	1.2679	0.058	0.0449542	0.0124422	-0.0152	0.024	0.0132	0.015	0.004279	0.00023	4.52237	0.0374315	99.7757	0.706202	76.6748	0.621527	0.680806	1.2196e-18	NM-254E	0.009459	3.5e-05	7.14273	1.0007	0.000698	7.8e-06	4e-05	2e-06	0.000273	2e-07	0.0123	0	0.008068
61411-150	CM-SS2	ARGUS VI (Obama)	2013-02-16	2.83333	4	199.244	0.198656	13.5789	0.0711404	0.1365	0.0892861	-0.205017	0.338843	-0.0001055	0.0012993	1.06567	0.0002916	1.2679	0.058	0.0446483	0.0124032	-0.0152	0.024	0.0132	0.015	0.004279	0.00023	14.6658	0.0833241	100.007	0.240648	237.797	1.26697	1.51197	1.35789e-18	NM-254E	0.009459	3.5e-05	7.14344	1.0007	0.000698	7.8e-06	4e-05	2e-06	0.000273	2e-07	0.0123	0	0.008068
61411-151	CM-SS2	ARGUS VI (Obama)	2013-02-16	3.15	4	127.183	0.160823	7.98187	0.0544475	-0.0556	0.0835225	-0.0821707	0.278666	0.0012351	0.0009036	1.06567	0.0002916	1.2679	0.058	0.0438513	0.0123028	-0.0152	0.024	0.0132	0.015	0.004279	0.00023	15.878	0.115319	99.6994	0.277703	256.135	1.73598	1.94829	7.98187e-19	NM-254E	0.009459	3.5e-05	7.14528	1.0007	0.000698	7.8e-06	4e-05	2e-06	0.000273	2e-07	0.0123	0	0.008068
61411-152	CM-SS2	ARGUS VI (Obama)	2013-02-16	3.26667	4	47.2251	0.179622	10.7584	0.0457095	-0.0675	0.0825651	0.425186	0.278694	0.0009303	0.0010902	1.06567	0.0002916	1.2679	0.058	0.0435446	0.0122646	-0.0152	0.024	0.0132	0.015	0.004279	0.00023	4.3582	0.0392424	99.4649	0.875376	73.9468	0.652567	0.705518	1.07584e-18	NM-254E	0.009459	3.5e-05	7.14599	1.0007	0.000698	7.8e-06	4e-05	2e-06	0.000273	2e-07	0.0123	0	0.008068
61411-153	CM-SS2	ARGUS VI (Obama)	2013-02-16	3.65	4	61.0551	0.0627694	14.8856	0.015186	0.156	0.031241	0.133673	0.132965	0.0032599	0.0003209	1.06567	0.0002916	1.2679	0.058	0.0425589	0.0121442	-0.0152	0.024	0.0132	0.015	0.004279	0.00023	4.02895	0.0087525	98.4214	0.214124	68.4635	0.145983	0.288335	1.48856e-18	NM-254E	0.009459	3.5e-05	7.14827	1.0007	0.000698	7.8e-06	4e-05	2e-06	0.000273	2e-07	0.0123	0	0.008068
61411-154	CM-SS2	ARGUS VI (Obama)	2013-02-16	3.91667	4	20.0621	0.170188	4.49148	0.0641898	0.1697	0.0787464	0.631329	0.366389	-0.0007449	0.0011946	1.06567	0.0002916	1.2679	0.058	0.041887	0.0120638	-0.0152	0.024	0.0132	0.015	0.004279	0.00023	4.52116	0.10936	101.392	2.15579	76.6548	1.81587	1.837	4.49148e-19	NM-254E	0.009459	3.5e-05	7.14982	1.0007	0.000698	7.8e-06	4e-05	2e-06	0.000273	2e-07	0.0123	0	0.008068
61411-155	CM-SS2	ARGUS VI (Obama)	2013-02-16	4.03333	4	133.379	0.189114	9.37552	0.0760118	0.2046	0.0960469	0.301037	0.292123	0.0012586	0.0011946	1.06567	0.0002916	1.2679	0.058	0.0415811	0.0120278	-0.0152	0.024	0.0132	0.015	0.004279	0.00023	14.1816	0.122856	99.7402	0.334364	230.419	1.87561	2.03953	9.37552e-19	NM-254E	0.009459	3.5e-05	7.15053	1.0007	0.000698	7.8e-06	4e-05	2e-06	0.000273	2e-07	0.0123	0	0.008068
61411-156	CM-SS2	ARGUS VI (Obama)	2013-02-16	4.15	4	21.4821	0.124354	1.56373	0.0602488	-0.065	0.074	-0.465546	0.265753	0.001623	0.000883	1.06567	0.0002916	1.2679	0.058	0.0412751	0.011992	-0.0152	0.024	0.0132	0.015	0.004279	0.00023	13.3908	0.548902	97.552	1.47223	218.306	8.43557	8.46987	1.56373e-19	NM-254E	0.009459	3.5e-05	7.15124	1.0007	0.000698	7.8e-06	4e-05	2e-06	0.000273	2e-07	0.0123	0	0.008068
61411-157	CM-SS2	ARGUS VI (Obama)	2013-02-16	4.28333	4	554.042	0.305555	11.1429	0.0700776	0.0549	0.0777946	0.249603	0.414628	0.0005872	0.0012993	1.06567	0.0002916	1.2679	0.058	0.040967	0.0119563	-0.0152	0.024	0.0132	0.015	0.004279	0.00023	49.7001	0.315771	99.9714	0.104914	705.362	3.71909	4.30382	1.11429e-18	NM-254E	0.009459	3.5e-05	7.15195	1.0007	0.000698	7.8e-06	4e-05	2e-06	0.000273	2e-07	0.0123	0	0.008068
61411-158	CM-SS2	ARGUS VI (Obama)	2013-02-16	4.4	4	51.5021	0.189114	10.9973	0.0592542	0.1812	0.0864002	0.0865471	0.32574	-0.0006703	0.0014043	1.06567	0.0002916	1.2679	0.058	0.0406618	0.0119212	-0.0152	0.024	0.0132	0.015	0.004279	0.00023	4.69413	0.0489126	100.406	0.968	79.5245	0.810899	0.860509	1.09973e-18	NM-254E	0.009459	3.5e-05	7.15266	1.0007	0.000698	7.8e-06	4e-05	2e-06	0.000273	2e-07	0.0123	0	0.008068
61411-159	CM-SS2	ARGUS VI (Obama)	2013-02-16	4.51667	4	1108.09	0.463642	12.923	0.0730259	0.0614	0.0883233	0.453524	0.346108	-2.02e-05	0.0011946	1.06567	0.0002916	1.2679	0.058	0.040353	0.0118861	-0.0152	0.024	0.0132	0.015	0.004279	0.00023	85.7419	0.486695	100.004	0.0673886	1087.13	4.65312	5.55445	1.2923e-18	NM-254E	0.009459	3.5e-05	7.15337	1.0007	0.000698	7.8e-06	4e-05	2e-06	0.000273	2e-07	0.0123	0	0.008068
61411-160	CM-SS2	ARGUS VI (Obama)	2013-02-16	5.03333	4	1601.39	0.55305	13.5616	0.0601991	0.0299	0.0864002	0.441551	0.380436	-0.0032173	0.0014043	1.06567	0.0002916	1.2679	0.058	0.039036	0.01174	-0.0152	0.024	0.0132	0.015	0.004279	0.00023	118.15	0.527018	100.062	0.0554445	1373.37	4.30922	5.59887	1.35616e-18	NM-254E	0.009459	3.5e-05	7.15642	1.0007	0.000698	7.8e-06	4e-05	2e-06	0.000273	2e-07	0.0123	0	0.008068
61411-161	CM-SS2	ARGUS VI (Obama)	2013-02-16	5.15	4	209.23	0.170188	9.70741	0.0504145	0.0906	0.0825651	0.140996	0.380474	0.0025747	0.0010278	1.06567	0.0002916	1.2679	0.058	0.0387265	0.0117066	-0.0152	0.024	0.0132	0.015	0.004279	0.00023	21.4678	0.117294	99.638	0.186718	338.407	1.68811	2.0388	9.70741e-19	NM-254E	0.009459	3.5e-05	7.15714	1.0007	0.000698	7.8e-06	4e-05	2e-06	0.000273	2e-07	0.0123	0	0.008068
61411-162	CM-SS2	ARGUS VI (Obama)	2013-02-16	5.28333	4	393.123	0.266391	14.6406	0.0739796	0.2265	0.0730548	-0.584081	0.401159	-0.0003186	0.0012993	1.06567	0.0002916	1.2679	0.058	0.0384163	0.0116734	-0.0152	0.024	0.0132	0.015	0.004279	0.00023	26.8462	0.139467	100.013	0.137722	414.221	1.9258	2.36434	1.46406e-18	NM-254E	0.009459	3.5e-05	7.15785	1.0007	0.000698	7.8e-06	4e-05	2e-06	0.000273	2e-07	0.0123	0	0.008068
61411-163	CM-SS2	ARGUS VI (Obama)	2013-02-16	5.4	4	1264.69	0.443806	12.7408	0.0503993	-0.0566	0.0806536	-0.206882	0.292452	0.0226466	0.001932	1.06567	0.0002916	1.2679	0.058	0.0381097	0.0116409	-0.0152	0.024	0.0132	0.015	0.004279	0.00023	98.7221	0.394711	99.4642	0.0672801	1207.2	3.5341	4.8153	1.27408e-18	NM-254E	0.009459	3.5e-05	7.15857	1.0007	0.000698	7.8e-06	4e-05	2e-06	0.000273	2e-07	0.0123	0	0.008068
61411-164	CM-SS2	ARGUS VI (Obama)	2013-02-16	5.51667	4	541.289	0.305555	9.47548	0.046506	0.118	0.0806536	0.263462	0.279212	0.0008802	0.0010902	1.06567	0.0002916	1.2679	0.058	0.0378002	0.0116086	-0.0152	0.024	0.0132	0.015	0.004279	0.00023	57.0929	0.28421	99.9555	0.0999694	790.426	3.19537	3.98141	9.47548e-19	NM-254E	0.009459	3.5e-05	7.15928	1.0007	0.000698	7.8e-06	4e-05	2e-06	0.000273	2e-07	0.0123	0	0.008068
61411-165	CM-SS2	ARGUS VI (Obama)	2013-02-16	5.91667	4	8.9331	0.142352	1.92374	0.0601542	0.1897	0.0892861	-0.0708995	0.319393	0.0008664	0.0008112	1.06567	0.0002916	1.2679	0.058	0.0368124	0.0115076	-0.0152	0.024	0.0132	0.015	0.004279	0.00023	4.50235	0.203383	97.1293	3.51978	76.3423	3.37766	3.38897	1.92374e-19	NM-254E	0.009459	3.5e-05	7.16157	1.0007	0.000698	7.8e-06	4e-05	2e-06	0.000273	2e-07	0.0123	0	0.008068
61411-166	CM-SS2	ARGUS VI (Obama)	2013-02-16	6.03333	4	48.8931	0.151539	9.54542	0.0650668	0.2487	0.0844808	0.174043	0.353355	0.0011094	0.0011946	1.06567	0.0002916	1.2679	0.058	0.0365051	0.0114769	-0.0152	0.024	0.0132	0.015	0.004279	0.00023	5.08166	0.0534516	99.3647	0.852573	85.9379	0.883051	0.936095	9.54542e-19	NM-254E	0.009459	3.5e-05	7.16228	1.0007	0.000698	7.8e-06	4e-05	2e-06	0.000273	2e-07	0.0123	0	0.008068
61411-167	CM-SS2	ARGUS VI (Obama)	2013-02-16	6.15	4	66.4781	0.142352	11.3558	0.0552388	0.1809	0.076844	0.764291	0.292633	-0.0008834	0.0012993	1.06567	0.0002916	1.2679	0.058	0.0361991	0.0114467	-0.0152	0.024	0.0132	0.015	0.004279	0.00023	5.87515	0.0463049	100.493	0.658737	99.0002	0.759543	0.839083	1.13558e-18	NM-254E	0.009459	3.5e-05	7.16299	1.0007	0.000698	7.8e-06	4e-05	2e-06	0.000273	2e-07	0.0123	0	0.008068
61411-168	CM-SS2	ARGUS VI (Obama)	2013-02-16	6.26667	4	202.518	0.246909	11.0979	0.0749283	0.0938	0.0921792	-0.356752	0.353426	3.94e-05	0.001007	1.06567	0.0002916	1.2679	0.058	0.0358918	0.0114168	-0.0152	0.024	0.0132	0.015	0.004279	0.00023	18.2359	0.128093	99.9788	0.227891	291.292	1.8916	2.138	1.10979e-18	NM-254E	0.009459	3.5e-05	7.1637	1.0007	0.000698	7.8e-06	4e-05	2e-06	0.000273	2e-07	0.0123	0	0.008068
61411-169	CM-SS2	ARGUS VI (Obama)	2013-02-16	6.4	4	581.927	0.325214	18.0441	0.0798728	0.2037	0.093145	0.123228	0.306064	0.0052442	0.0011946	1.06567	0.0002916	1.2679	0.058	0.0355858	0.0113874	-0.0152	0.024	0.0132	0.015	0.004279	0.00023	32.1562	0.144876	99.733	0.0999813	486.113	1.92344	2.48897	1.80441e-18	NM-254E	0.009459	3.5e-05	7.16441	1.0007	0.000698	7.8e-06	4e-05	2e-06	0.000273	2e-07	0.0123	0	0.008068
61411-170	CM-SS2	ARGUS VI (Obama)	2013-02-16	6.7	4	40.2821	0.443806	3.54972	0.0897793	0.0814	0.0806536	-0.767507	0.415458	-0.0014056	0.0045882	1.06567	0.0002916	1.2679	0.058	0.0347853	0.0113121	-0.0152	0.024	0.0132	0.015	0.004279	0.00023	11.4391	0.497864	100.89	3.74139	188.064	7.77868	7.80674	3.54972e-19	NM-254E	0.009459	3.5e-05	7.16627	1.0007	0.000698	7.8e-06	4e-05	2e-06	0.000273	2e-07	0.0123	0	0.008068
61411-171	CM-SS2	ARGUS VI (Obama)	2013-02-16	7.03333	4	1450.31	0.453722	17.9007	0.0551957	0.217	0.0970155	0.361277	0.381062	0.0038695	0.0015096	1.06567	0.0002916	1.2679	0.058	0.0339586	0.011237	-0.0152	0.024	0.0132	0.015	0.004279	0.00023	80.9503	0.252192	99.9225	0.0540679	1040.73	2.47301	3.83967	1.79007e-18	NM-254E	0.009459	3.5e-05	7.16819	1.00071	0.000698	7.8e-06	4e-05	2e-06	0.000273	2e-07	0.0123	0	0.008068
61411-172	CM-SS2	ARGUS VI (Obama)	2013-02-16	7.15	4	55.9431	0.160823	13.4691	0.0532321	0.2096	0.076844	0.250194	0.31972	-0.0011179	0.0012993	1.06567	0.0002916	1.2679	0.058	0.0336526	0.01121	-0.0152	0.024	0.0132	0.015	0.004279	0.00023	4.17181	0.0353001	100.637	0.806318	70.8448	0.588006	0.641768	1.34691e-18	NM-254E	0.009459	3.5e-05	7.16889	1.00071	0.000698	7.8e-06	4e-05	2e-06	0.000273	2e-07	0.0123	0	0.008068
61411-173	CM-SS2	ARGUS VI (Obama)	2013-02-16	7.26667	4	305.892	0.217862	16.1037	0.0581277	0.1473	0.0979847	0.152713	0.367403	0.0050523	0.0014043	1.06567	0.0002916	1.2679	0.058	0.0333467	0.0111833	-0.0152	0.024	0.0132	0.015	0.004279	0.00023	18.8943	0.0742887	99.5108	0.170108	300.989	1.09125	1.4985	1.61037e-18	NM-254E	0.009459	3.5e-05	7.1696	1.00071	0.000698	7.8e-06	4e-05	2e-06	0.000273	2e-07	0.0123	0	0.008068
61411-174	CM-SS2	ARGUS VI (Obama)	2013-02-16	7.4	4	2094.93	0.543106	60.1698	0.0818225	0.7106	0.0664831	0.344175	0.394954	0.0050737	0.0012993	1.06567	0.0002916	1.2679	0.058	0.0330393	0.0111569	-0.0152	0.024	0.0132	0.015	0.004279	0.00023	34.7843	0.0486	99.9291	0.0410866	520.676	0.633166	1.79238	6.01698e-18	NM-254E	0.009459	3.5e-05	7.17032	1.00071	0.000698	7.8e-06	4e-05	2e-06	0.000273	2e-07	0.0123	0	0.008068
61411-176	CM-SS2	ARGUS VI (Obama)	2013-02-16	7.63333	4	928.985	0.423986	10.9171	0.0640164	0.1774	0.0950789	0.152758	0.340186	0.0016017	0.0009759	1.06567	0.0002916	1.2679	0.058	0.0324246	0.0111053	-0.0152	0.024	0.0132	0.015	0.004279	0.00023	85.0451	0.500988	99.9502	0.0717923	1080.45	4.80727	5.67693	1.09171e-18	NM-254E	0.009459	3.5e-05	7.17174	1.00071	0.000698	7.8e-06	4e-05	2e-06	0.000273	2e-07	0.0123	0	0.008068
61411-177	CM-SS2	ARGUS VI (Obama)	2013-02-16	8.01667	4	548.615	0.25664	6.55528	0.0561339	0.1439	0.0806536	0.362289	0.293084	0.0011808	0.001059	1.06567	0.0002916	1.2679	0.058	0.0314383	0.0110258	-0.0152	0.024	0.0132	0.015	0.004279	0.00023	83.6369	0.719008	99.9418	0.0877726	1066.89	6.9506	7.56708	6.55528e-19	NM-254E	0.009459	3.5e-05	7.17403	1.00071	0.000698	7.8e-06	4e-05	2e-06	0.000273	2e-07	0.0123	0	0.008068
61411-178	CM-SS2	ARGUS VI (Obama)	2013-02-16	8.15	4	262.326	0.246909	17.1152	0.0679452	0.169	0.0864002	0.34941	0.333529	0.0018447	0.0011946	1.06567	0.0002916	1.2679	0.058	0.031133	0.0110021	-0.0152	0.024	0.0132	0.015	0.004279	0.00023	15.2886	0.0658185	99.8004	0.190389	247.242	0.995641	1.31286	1.71152e-18	NM-254E	0.009459	3.5e-05	7.17474	1.00071	0.000698	7.8e-06	4e-05	2e-06	0.000273	2e-07	0.0123	0	0.008068
61411-179	CM-SS2	ARGUS VI (Obama)	2013-02-16	8.45	4	667.397	0.335058	10.3232	0.0570993	0.1596	0.0844808	-0.354524	0.388399	0.0004167	0.0014043	1.06567	0.0002916	1.2679	0.058	0.030336	0.010942	-0.0152	0.024	0.0132	0.015	0.004279	0.00023	64.6256	0.361276	99.9773	0.0948521	873.215	3.8822	4.65558	1.03233e-18	NM-254E	0.009459	3.5e-05	7.17659	1.00071	0.000698	7.8e-06	4e-05	2e-06	0.000273	2e-07	0.0123	0	0.008068
61411-180	CM-SS2	ARGUS VI (Obama)	2013-02-16	8.58333	4	647.951	0.325214	8.55871	0.0738643	0.12	0.0835225	-0.199529	0.347266	0.0070025	0.0015096	1.06567	0.0002916	1.2679	0.058	0.0300315	0.0109198	-0.0152	0.024	0.0132	0.015	0.004279	0.00023	75.4517	0.654481	99.6755	0.099317	986.003	6.61266	7.18917	8.55871e-19	NM-254E	0.009459	3.5e-05	7.1773	1.00071	0.000698	7.8e-06	4e-05	2e-06	0.000273	2e-07	0.0123	0	0.008068
61411-181	CM-SS2	ARGUS VI (Obama)	2013-02-16	8.7	4	64.8281	0.151539	10.6119	0.0639808	0.0796	0.10284	-0.359618	0.340483	0.0005989	0.0008933	1.06567	0.0002916	1.2679	0.058	0.0297248	0.0108978	-0.0152	0.024	0.0132	0.015	0.004279	0.00023	6.081	0.0467863	99.6754	0.529327	102.374	0.766027	0.85001	1.06119e-18	NM-254E	0.009459	3.5e-05	7.17801	1.00071	0.000698	7.8e-06	4e-05	2e-06	0.000273	2e-07	0.0123	0	0.008068
61411-182	CM-SS2	ARGUS VI (Obama)	2013-02-16	8.81667	4	319.281	0.217862	17.0381	0.0492515	0.2139	0.0941116	-0.19239	0.326928	0.003976	0.0011946	1.06567	0.0002916	1.2679	0.058	0.0294168	0.0108762	-0.0152	0.024	0.0132	0.015	0.004279	0.00023	18.6606	0.0592939	99.6239	0.147648	297.552	0.872626	1.33943	1.70381e-18	NM-254E	0.009459	3.5e-05	7.17873	1.00071	0.000698	7.8e-06	4e-05	2e-06	0.000273	2e-07	0.0123	0	0.008068
61411-183	CM-SS2	ARGUS VI (Obama)	2013-02-16	9.13333	4	36.0691	0.170188	4.34017	0.0639676	0.1374	0.072111	-0.550755	0.37484	0.0002142	0.0011946	1.06567	0.0002916	1.2679	0.058	0.0285936	0.0108205	-0.0152	0.024	0.0132	0.015	0.004279	0.00023	8.27763	0.152426	99.7097	1.19505	137.99	2.44757	2.4965	4.34017e-19	NM-254E	0.009459	3.5e-05	7.18064	1.00071	0.000698	7.8e-06	4e-05	2e-06	0.000273	2e-07	0.0123	0	0.008068
61411-184	CM-SS2	ARGUS VI (Obama)	2013-02-16	9.26667	4	3069.36	0.682469	24.0538	0.0718675	0.253	0.0892861	0.462479	0.306787	0.0047966	0.0018262	1.06567	0.0002916	1.2679	0.058	0.028287	0.0108006	-0.0152	0.024	0.0132	0.015	0.004279	0.00023	127.54	0.382822	99.9546	0.0361049	1448.58	3.00419	4.76867	2.40538e-18	NM-254E	0.009459	3.5e-05	7.18135	1.00071	0.000698	7.8e-06	4e-05	2e-06	0.000273	2e-07	0.0123	0	0.008068
61411-185	CM-SS2	ARGUS VI (Obama)	2013-02-16	9.38333	4	1225.24	0.394289	97.6257	0.0807802	1.3875	0.0902497	0.297337	0.36118	0.0062033	0.0015096	1.06567	0.0002916	1.2679	0.058	0.027981	0.0107811	-0.0152	0.024	0.0132	0.015	0.004279	0.00023	12.5237	0.0120498	99.8517	0.0585414	204.932	0.186541	0.741236	9.76257e-18	NM-254E	0.009459	3.5e-05	7.18206	1.00071	0.000698	7.8e-06	4e-05	2e-06	0.000273	2e-07	0.0123	0	0.008068
61411-186	CM-SS2	ARGUS VI (Obama)	2013-02-16	9.5	4	1483.02	0.493421	17.4084	0.0590317	0.3204	0.0796994	0.264326	0.381837	0.0014291	0.001615	1.06567	0.0002916	1.2679	0.058	0.0276744	0.010762	-0.0152	0.024	0.0132	0.015	0.004279	0.00023	85.1595	0.291525	99.9731	0.0571982	1081.55	2.79567	4.11669	1.74084e-18	NM-254E	0.009459	3.5e-05	7.18277	1.00071	0.000698	7.8e-06	4e-05	2e-06	0.000273	2e-07	0.0123	0	0.008068
61411-187	CM-SS2	ARGUS VI (Obama)	2013-02-16	9.61667	4	964.764	0.384401	10.1765	0.0570615	0.0635	0.076844	0.351991	0.280156	-0.0002195	0.0010798	1.06567	0.0002916	1.2679	0.058	0.027367	0.0107434	-0.0152	0.024	0.0132	0.015	0.004279	0.00023	94.8062	0.533949	100.009	0.0655314	1171.8	4.87415	5.83197	1.01765e-18	NM-254E	0.009459	3.5e-05	7.18349	1.00071	0.000698	7.8e-06	4e-05	2e-06	0.000273	2e-07	0.0123	0	0.008068
61411-188	CM-SS2	ARGUS VI (Obama)	2013-02-16	10.2	4	258.802	0.189114	12.2071	0.0659148	0.2373	0.0806536	-0.0689946	0.395869	-0.000162	0.0010902	1.06567	0.0002916	1.2679	0.058	0.0258825	0.0106594	-0.0152	0.024	0.0132	0.015	0.004279	0.00023	21.1966	0.118612	100.018	0.163151	334.499	1.71072	2.0509	1.22071e-18	NM-254E	0.009459	3.5e-05	7.18694	1.00071	0.000698	7.8e-06	4e-05	2e-06	0.000273	2e-07	0.0123	0	0.008068
61411-189	CM-SS2	ARGUS VI (Obama)	2013-02-16	10.3333	4	18.7331	0.151539	2.48748	0.0540963	0.0171	0.0777946	0.0697202	0.307057	-0.0005531	0.0012993	1.06567	0.0002916	1.2679	0.058	0.0255751	0.0106433	-0.0152	0.024	0.0132	0.015	0.004279	0.00023	7.59131	0.235327	100.908	2.37136	126.936	3.80163	3.82861	2.48748e-19	NM-254E	0.009459	3.5e-05	7.18765	1.00071	0.000698	7.8e-06	4e-05	2e-06	0.000273	2e-07	0.0123	0	0.008068
61411-190	CM-SS2	ARGUS VI (Obama)	2013-02-16	10.45	4	363.353	0.2372	8.70848	0.0550747	0.0766	0.08544	0.433459	0.286995	0.0013907	0.001059	1.06567	0.0002916	1.2679	0.058	0.0252657	0.0106276	-0.0152	0.024	0.0132	0.015	0.004279	0.00023	41.6737	0.267514	99.8952	0.126912	608.301	3.3223	3.83472	8.70848e-19	NM-254E	0.009459	3.5e-05	7.18837	1.00071	0.000698	7.8e-06	4e-05	2e-06	0.000273	2e-07	0.0123	0	0.008068
61411-191	CM-SS2	ARGUS VI (Obama)	2013-02-16	10.5667	4	767.344	0.315379	6.50793	0.0491939	0.1031	0.0664831	0.507549	0.32062	0.0011275	0.0008727	1.06567	0.0002916	1.2679	0.058	0.0249597	0.0106125	-0.0152	0.024	0.0132	0.015	0.004279	0.00023	117.862	0.89329	99.9617	0.0673669	1371.02	7.3135	8.13854	6.50793e-19	NM-254E	0.009459	3.5e-05	7.18908	1.00071	0.000698	7.8e-06	4e-05	2e-06	0.000273	2e-07	0.0123	0	0.008068
61411-192	CM-SS2	ARGUS VI (Obama)	2013-02-16	10.6833	4	2.4631	0.151539	0.136344	0.0580178	-0.0382	0.0787464	0.383935	0.423771	-0.0027239	0.0010798	1.06567	0.0002916	1.2679	0.058	0.0246524	0.0105978	-0.0152	0.024	0.0132	0.015	0.004279	0.00023	24.2736	10.6824	134.161	16.7001	378.349	150.424	150.429	1.36344e-20	NM-254E	0.009459	3.5e-05	7.1898	1.00071	0.000698	7.8e-06	4e-05	2e-06	0.000273	2e-07	0.0123	0	0.008068
61411-194	CM-SS2	ARGUS VI (Obama)	2013-02-16	11.1333	4	36.7911	0.170188	3.86531	0.0728199	0.0101	0.074	0.317905	0.368572	-8.42e-05	0.0011946	1.06567	0.0002916	1.2679	0.058	0.0235233	0.0105478	-0.0152	0.024	0.0132	0.015	0.004279	0.00023	9.52348	0.206752	100.134	1.17213	157.887	3.284	3.33136	3.86531e-19	NM-254E	0.009459	3.5e-05	7.19243	1.00071	0.000698	7.8e-06	4e-05	2e-06	0.000273	2e-07	0.0123	0	0.008068
61411-195	CM-SS2	ARGUS VI (Obama)	2013-02-16	11.25	4	174.373	0.198656	18.5461	0.0658948	0.2599	0.0864002	0.527257	0.361737	0.0034325	0.0011946	1.06567	0.0002916	1.2679	0.058	0.0232152	0.0105353	-0.0152	0.024	0.0132	0.015	0.004279	0.00023	9.34151	0.0398738	99.4384	0.26058	154.994	0.634349	0.839514	1.85461e-18	NM-254E	0.009459	3.5e-05	7.19314	1.00071	0.000698	7.8e-06	4e-05	2e-06	0.000273	2e-07	0.0123	0	0.008068
61411-196	CM-SS2	ARGUS VI (Obama)	2013-02-16	11.3833	4	8.3631	0.189114	0.434599	0.0570204	-0.0768	0.0816088	-0.143877	0.307322	0.0035498	0.0022497	1.06567	0.0002916	1.2679	0.058	0.0229078	0.0105232	-0.0152	0.024	0.0132	0.015	0.004279	0.00023	16.7612	2.72234	87.1583	8.56831	269.383	40.6859	40.6965	4.34599e-20	NM-254E	0.009459	3.5e-05	7.19386	1.00071	0.000698	7.8e-06	4e-05	2e-06	0.000273	2e-07	0.0123	0	0.008068
61411-197	CM-SS2	ARGUS VI (Obama)	2013-02-16	11.5	4	163.736	0.189114	8.90829	0.0530893	0.1877	0.076844	-0.691398	0.334451	0.0020791	0.0014043	1.06567	0.0002916	1.2679	0.058	0.0226012	0.0105117	-0.0152	0.024	0.0132	0.015	0.004279	0.00023	18.2957	0.1207	99.5893	0.303749	292.174	1.78156	2.04265	8.90829e-19	NM-254E	0.009459	3.5e-05	7.19457	1.00071	0.000698	7.8e-06	4e-05	2e-06	0.000273	2e-07	0.0123	0	0.008068
61411-198	CM-SS2	ARGUS VI (Obama)	2013-02-16	11.6167	4	251.319	0.20824	14.8394	0.071823	0.227	0.091214	-0.0913801	0.341302	0.0007044	0.0011946	1.06567	0.0002916	1.2679	0.058	0.0222938	0.0105005	-0.0152	0.024	0.0132	0.015	0.004279	0.00023	16.9133	0.0865166	99.9143	0.184235	271.655	1.2914	1.59385	1.48394e-18	NM-254E	0.009459	3.5e-05	7.19529	1.00071	0.000698	7.8e-06	4e-05	2e-06	0.000273	2e-07	0.0123	0	0.008068
61411-199	CM-SS2	ARGUS VI (Obama)	2013-02-16	11.9333	4	116.281	0.189114	7.40233	0.0491642	0.1938	0.0825651	0.219513	0.26089	-0.0034091	0.0011946	1.06567	0.0002916	1.2679	0.058	0.0214961	0.0104739	-0.0152	0.024	0.0132	0.015	0.004279	0.00023	15.8413	0.118571	100.894	0.38419	255.583	1.78547	1.99173	7.40233e-19	NM-254E	0.009459	3.5e-05	7.19714	1.00071	0.000698	7.8e-06	4e-05	2e-06	0.000273	2e-07	0.0123	0	0.008068
61411-200	CM-SS2	ARGUS VI (Obama)	2013-02-16	12.3167	4	434.014	0.305555	8.03247	0.0668687	0.0537	0.0825651	-0.0446366	0.260974	0.0004007	0.001059	1.06567	0.0002916	1.2679	0.058	0.0205048	0.0104453	-0.0152	0.024	0.0132	0.015	0.004279	0.00023	54.0086	0.453011	99.9711	0.123396	755.416	5.19154	5.67425	8.03247e-19	NM-254E	0.009459	3.5e-05	7.19945	1.00071	0.000698	7.8e-06	4e-05	2e-06	0.000273	2e-07	0.0123	0	0.008068
61411-201	CM-SS2	ARGUS VI (Obama)	2013-02-16	12.4333	4	435.34	0.315379	6.26983	0.068845	0.0397	0.0777946	-0.223925	0.267571	-0.0009687	0.0014043	1.06567	0.0002916	1.2679	0.058	0.0201982	0.0104375	-0.0152	0.024	0.0132	0.015	0.004279	0.00023	69.4671	0.767435	100.062	0.140623	924.516	8.01881	8.45664	6.26983e-19	NM-254E	0.009459	3.5e-05	7.20017	1.00071	0.000698	7.8e-06	4e-05	2e-06	0.000273	2e-07	0.0123	0	0.008068
61411-202	CM-SS2	ARGUS VI (Obama)	2013-02-16	12.5667	4	27.5041	0.179622	3.44765	0.058972	0.0309	0.0711688	-0.808659	0.403571	0.0004327	0.0010486	1.06567	0.0002916	1.2679	0.058	0.0198908	0.0104301	-0.0152	0.024	0.0132	0.015	0.004279	0.00023	7.91164	0.171401	99.2893	1.46853	132.104	2.76112	2.80111	3.44765e-19	NM-254E	0.009459	3.5e-05	7.20088	1.00071	0.000698	7.8e-06	4e-05	2e-06	0.000273	2e-07	0.0123	0	0.008068
61411-203	CM-SS2	ARGUS VI (Obama)	2013-02-16	12.6833	4	92.8951	0.151539	7.35051	0.0570021	0.0509	0.0796994	-0.556684	0.396677	0.0020035	0.0010798	1.06567	0.0002916	1.2679	0.058	0.0195834	0.0104232	-0.0152	0.024	0.0132	0.015	0.004279	0.00023	12.5415	0.108795	99.306	0.417486	205.208	1.68397	1.83077	7.35051e-19	NM-254E	0.009459	3.5e-05	7.2016	1.00071	0.000698	7.8e-06	4e-05	2e-06	0.000273	2e-07	0.0123	0	0.008068
61411-204	CM-SS2	ARGUS VI (Obama)	2013-02-16	12.8	4	89.4421	0.151539	3.48699	0.0491521	0.0399	0.0864002	-0.0792255	0.28089	-0.0005851	0.0011946	1.06567	0.0002916	1.2679	0.058	0.0192761	0.0104168	-0.0152	0.024	0.0132	0.015	0.004279	0.00023	25.6899	0.378936	100.188	0.465565	398.185	5.27847	5.44202	3.48699e-19	NM-254E	0.009459	3.5e-05	7.20231	1.00071	0.000698	7.8e-06	4e-05	2e-06	0.000273	2e-07	0.0123	0	0.008068
61411-205	CM-SS2	ARGUS VI (Obama)	2013-02-16	12.9167	4	36.3521	0.160823	8.00799	0.0550333	0.1086	0.0806536	-0.0561836	0.34167	0.0023018	0.0009863	1.06567	0.0002916	1.2679	0.058	0.0189701	0.010411	-0.0152	0.024	0.0132	0.015	0.004279	0.00023	4.44522	0.0519671	98.0984	1.02348	75.3933	0.863486	0.905705	8.00799e-19	NM-254E	0.009459	3.5e-05	7.20303	1.00071	0.000698	7.8e-06	4e-05	2e-06	0.000273	2e-07	0.0123	0	0.008068
61411-206	CM-SS2	ARGUS VI (Obama)	2013-02-16	13.05	4	31.8191	0.170188	2.53624	0.0550323	0.0906	0.0730548	0.566215	0.321275	0.0010667	0.0015096	1.06567	0.0002916	1.2679	0.058	0.0186564	0.0104054	-0.0152	0.024	0.0132	0.015	0.004279	0.00023	12.4336	0.330179	99.1541	1.60512	203.537	5.11533	5.16475	2.53624e-19	NM-254E	0.009459	3.5e-05	7.20376	1.00071	0.000698	7.8e-06	4e-05	2e-06	0.000273	2e-07	0.0123	0	0.008068
61411-207	CM-SS2	ARGUS VI (Obama)	2013-02-16	13.3833	4	83.3681	0.179622	18.3001	0.0619228	0.2336	0.0749466	0.71913	0.355498	0.004658	0.0014043	1.06567	0.0002916	1.2679	0.058	0.0178184	0.0103931	-0.0152	0.024	0.0132	0.015	0.004279	0.00023	4.47502	0.0291941	98.4028	0.588068	75.8885	0.484957	0.557532	1.83001e-18	NM-254E	0.009459	3.5e-05	7.20571	1.00071	0.000698	7.8e-06	4e-05	2e-06	0.000273	2e-07	0.0123	0	0.008068
61411-208	CM-SS2	ARGUS VI (Obama)	2013-02-16	13.7	4	67.3711	0.170188	3.9837	0.058964	-0.0275	0.0730548	0.495881	0.376247	-0.000665	0.0010694	1.06567	0.0002916	1.2679	0.058	0.0170172	0.0103848	-0.0152	0.024	0.0132	0.015	0.004279	0.00023	16.9641	0.267257	100.349	0.595199	272.413	3.9876	4.09611	3.9837e-19	NM-254E	0.009459	3.5e-05	7.20758	1.00071	0.000698	7.8e-06	4e-05	2e-06	0.000273	2e-07	0.0123	0	0.008068
61411-209	CM-SS2	ARGUS VI (Obama)	2013-02-16	13.8167	4	70.2101	0.179622	8.44396	0.0520829	0.1247	0.08544	-0.989699	0.348766	0.0023029	0.0015096	1.06567	0.0002916	1.2679	0.058	0.0167091	0.0103824	-0.0152	0.024	0.0132	0.015	0.004279	0.00023	8.2154	0.0766569	98.9082	0.736717	136.99	1.23158	1.32489	8.44396e-19	NM-254E	0.009459	3.5e-05	7.2083	1.00071	0.000698	7.8e-06	4e-05	2e-06	0.000273	2e-07	0.0123	0	0.008068
61411-210	CM-SS2	ARGUS VI (Obama)	2013-02-16	13.9333	4	900.244	0.354773	14.4611	0.0678474	0.163	0.0702282	-0.217713	0.31473	0.0017573	0.001059	1.06567	0.0002916	1.2679	0.058	0.0163968	0.0103806	-0.0152	0.024	0.0132	0.015	0.004279	0.00023	62.2065	0.293746	99.9398	0.0658975	847.033	3.20201	4.06795	1.44611e-18	NM-254E	0.009459	3.5e-05	7.20903	1.00071	0.000698	7.8e-06	4e-05	2e-06	0.000273	2e-07	0.0123	0	0.008068
61411-211	CM-SS2	ARGUS VI (Obama)	2013-02-16	14.05	4	558.836	0.335058	20.7236	0.0629073	0.1891	0.0787464	0.134101	0.32834	-0.0008088	0.0012993	1.06567	0.0002916	1.2679	0.058	0.0160916	0.0103793	-0.0152	0.024	0.0132	0.015	0.004279	0.00023	26.9703	0.0855573	100.044	0.109656	415.934	1.18029	1.81339	2.07236e-18	NM-254E	0.009459	3.5e-05	7.20974	1.00071	0.000698	7.8e-06	4e-05	2e-06	0.000273	2e-07	0.0123	0	0.008068
61411-212	CM-SS2	ARGUS VI (Obama)	2013-02-16	14.45	4	784.295	0.305555	9.86607	0.0520821	0.0764	0.0816088	0.115393	0.348946	-0.00099	0.0014043	1.06567	0.0002916	1.2679	0.058	0.0151052	0.0103783	-0.0152	0.024	0.0132	0.015	0.004279	0.00023	79.5174	0.423115	100.038	0.0768032	1026.63	4.18119	5.09275	9.86607e-19	NM-254E	0.009459	3.5e-05	7.21204	1.00071	0.000698	7.8e-06	4e-05	2e-06	0.000273	2e-07	0.0123	0	0.008068
61411-213	CM-SS2	ARGUS VI (Obama)	2013-02-16	14.5667	4	95.5441	0.198656	6.12203	0.0550273	0.0441	0.0777946	0.535186	0.369614	0.0022241	0.0010902	1.06567	0.0002916	1.2679	0.058	0.0148007	0.010379	-0.0152	0.024	0.0132	0.015	0.004279	0.00023	15.4981	0.152744	99.35	0.450276	250.408	2.30657	2.46377	6.12203e-19	NM-254E	0.009459	3.5e-05	7.21275	1.00071	0.000698	7.8e-06	4e-05	2e-06	0.000273	2e-07	0.0123	0	0.008068
61411-214	CM-SS2	ARGUS VI (Obama)	2013-02-16	14.6833	4	651.961	0.364642	29.7282	0.0807277	0.4241	0.0902497	-0.998344	0.349016	0.0004636	0.0010694	1.06567	0.0002916	1.2679	0.058	0.0144919	0.0103802	-0.0152	0.024	0.0132	0.015	0.004279	0.00023	21.9148	0.0617315	99.9668	0.0931109	344.829	0.885336	1.4616	2.97282e-18	NM-254E	0.009459	3.5e-05	7.21347	1.00071	0.000698	7.8e-06	4e-05	2e-06	0.000273	2e-07	0.0123	0	0.008068
61411-215	CM-SS2	ARGUS VI (Obama)	2013-02-16	14.8	4	55.3812	0.115603	12.6699	0.0560109	0.0847	0.0864002	-0.578578	0.390434	-0.00086	0.0010902	1.06567	0.0002916	1.2679	0.058	0.0141838	0.010382	-0.0152	0.024	0.0132	0.015	0.004279	0.00023	4.37913	0.0335243	100.372	0.660748	74.2948	0.557374	0.619066	1.26699e-18	NM-254E	0.009459	3.5e-05	7.21419	1.00071	0.000698	7.8e-06	4e-05	2e-06	0.000273	2e-07	0.0123	0	0.008068
61411-216	CM-SS2	ARGUS VI (Obama)	2013-02-16	14.9333	4	81.4501	0.160823	5.13916	0.0423245	0.1556	0.0655515	-0.227991	0.335396	0.0004561	0.0010278	1.06567	0.0002916	1.2679	0.058	0.0138737	0.0103842	-0.0152	0.024	0.0132	0.015	0.004279	0.00023	15.8112	0.14677	99.8157	0.469686	255.13	2.21066	2.37981	5.13916e-19	NM-254E	0.009459	3.5e-05	7.21491	1.00071	0.000698	7.8e-06	4e-05	2e-06	0.000273	2e-07	0.0123	0	0.008068
61411-217	CM-SS2	ARGUS VI (Obama)	2013-02-16	15.05	4	46.0101	0.170188	10.4691	0.0609355	0.0704	0.0749466	0.557768	0.294783	0.0019619	0.0012993	1.06567	0.0002916	1.2679	0.058	0.0135677	0.0103869	-0.0152	0.024	0.0132	0.015	0.004279	0.00023	4.33514	0.0477221	98.8196	0.992513	73.5634	0.793743	0.837383	1.04691e-18	NM-254E	0.009459	3.5e-05	7.21563	1.00071	0.000698	7.8e-06	4e-05	2e-06	0.000273	2e-07	0.0123	0	0.008068
61411-220	CM-SS2	ARGUS VI (Obama)	2013-02-16	15.8	4	53.1541	0.160823	6.49836	0.0678527	-0.1055	0.076844	-0.236821	0.335639	0.0004945	0.0010798	1.06567	0.0002916	1.2679	0.058	0.0116352	0.010415	-0.0152	0.024	0.0132	0.015	0.004279	0.00023	8.14432	0.101644	99.6694	0.743476	135.848	1.63406	1.70436	6.49836e-19	NM-254E	0.009459	3.5e-05	7.22014	1.00071	0.000698	7.8e-06	4e-05	2e-06	0.000273	2e-07	0.0123	0	0.008068
61411-221	CM-SS2	ARGUS VI (Obama)	2013-02-16	15.9333	4	29.1273	0.0623939	7.68539	0.0135851	0.0967	0.0294109	0.13503	0.134316	0.0011424	0.0003064	1.06567	0.0002916	1.2679	0.058	0.0113293	0.0104213	-0.0152	0.024	0.0132	0.015	0.004279	0.00023	3.73908	0.0159117	98.8668	0.437359	63.6223	0.266094	0.352616	7.68539e-19	NM-254E	0.009459	3.5e-05	7.22086	1.00071	0.000698	7.8e-06	4e-05	2e-06	0.000273	2e-07	0.0123	0	0.008068
61411-222	CM-SS2	ARGUS VI (Obama)	2013-02-16	16.2	4	486.384	0.285944	9.72553	0.0560211	0.0872	0.072111	0.306953	0.383945	-0.0001492	0.0010902	1.06567	0.0002916	1.2679	0.058	0.0106574	0.0104366	-0.0152	0.024	0.0132	0.015	0.004279	0.00023	50.0111	0.291584	100.014	0.106868	709.021	3.42735	4.0593	9.72553e-19	NM-254E	0.009459	3.5e-05	7.22243	1.00071	0.000698	7.8e-06	4e-05	2e-06	0.000273	2e-07	0.0123	0	0.008068
61411-223	CM-SS2	ARGUS VI (Obama)	2013-02-16	16.3167	4	571.456	0.25664	8.25209	0.0579901	0.0662	0.0758947	0.669586	0.29509	-0.0013726	0.001007	1.06567	0.0002916	1.2679	0.058	0.0103465	0.0104445	-0.0152	0.024	0.0132	0.015	0.004279	0.00023	69.3016	0.48946	100.081	0.0825509	922.786	5.11913	5.77911	8.25209e-19	NM-254E	0.009459	3.5e-05	7.22315	1.00071	0.000698	7.8e-06	4e-05	2e-06	0.000273	2e-07	0.0123	0	0.008068
61411-224	CM-SS2	ARGUS VI (Obama)	2013-02-16	16.7	4	185.923	0.20824	4.77303	0.0599648	0.025	0.064622	0.742779	0.404949	0.0007556	0.0010278	1.06567	0.0002916	1.2679	0.058	0.0093509	0.0104731	-0.0152	0.024	0.0132	0.015	0.004279	0.00023	38.9142	0.495256	99.9105	0.229229	573.705	6.268	6.52754	4.77303e-19	NM-254E	0.009459	3.5e-05	7.22548	1.00071	0.000698	7.8e-06	4e-05	2e-06	0.000273	2e-07	0.0123	0	0.008068
61411-225	CM-SS2	ARGUS VI (Obama)	2013-02-16	16.8333	4	85.0981	0.170188	11.7934	0.054065	0.1982	0.0581808	0.422009	0.288505	5.32835e-06	0.0009242	1.06567	0.0002916	1.2679	0.058	0.0090464	0.0104828	-0.0152	0.024	0.0132	0.015	0.004279	0.00023	7.21084	0.0430547	100.041	0.431247	120.78	0.697877	0.821019	1.17934e-18	NM-254E	0.009459	3.5e-05	7.22619	1.00071	0.000698	7.8e-06	4e-05	2e-06	0.000273	2e-07	0.0123	0	0.008068
61411-226	CM-SS2	ARGUS VI (Obama)	2013-02-16	16.95	4	265.634	0.198656	9.31335	0.0668763	0.1241	0.0674166	0.320875	0.301978	0.0015996	0.0012993	1.06567	0.0002916	1.2679	0.058	0.0087404	0.0104931	-0.0152	0.024	0.0132	0.015	0.004279	0.00023	28.4661	0.209771	99.8305	0.180335	436.454	2.8616	3.20208	9.31335e-19	NM-254E	0.009459	3.5e-05	7.22691	1.00071	0.000698	7.8e-06	4e-05	2e-06	0.000273	2e-07	0.0123	0	0.008068
61411-227	CM-SS2	ARGUS VI (Obama)	2013-02-16	17.2667	4	537.739	0.305555	6.1258	0.0570203	0.0413	0.0806536	0.155419	0.29532	-0.0004774	0.0009242	1.06567	0.0002916	1.2679	0.058	0.0079413	0.0105221	-0.0152	0.024	0.0132	0.015	0.004279	0.00023	87.8012	0.820152	100.028	0.0954205	1106.71	7.75775	8.34423	6.1258e-19	NM-254E	0.009459	3.5e-05	7.22877	1.00071	0.000698	7.8e-06	4e-05	2e-06	0.000273	2e-07	0.0123	0	0.008068
61411-228	CM-SS2	ARGUS VI (Obama)	2013-02-16	17.3833	4	1393.27	0.443806	12.2484	0.0629331	0.1454	0.0749466	-0.494497	0.405174	-0.0004252	0.0012993	1.06567	0.0002916	1.2679	0.058	0.0076346	0.0105341	-0.0152	0.024	0.0132	0.015	0.004279	0.00023	113.746	0.586462	100.006	0.0529893	1337.01	4.8915	6.0208	1.22484e-18	NM-254E	0.009459	3.5e-05	7.22949	1.00071	0.000698	7.8e-06	4e-05	2e-06	0.000273	2e-07	0.0123	0	0.008068
61411-229	CM-SS2	ARGUS VI (Obama)	2013-02-16	17.5	4	776.479	0.305555	7.89557	0.0599777	0.1196	0.0702282	0.881363	0.315655	-0.0010539	0.0011946	1.06567	0.0002916	1.2679	0.058	0.0073259	0.0105466	-0.0152	0.024	0.0132	0.015	0.004279	0.00023	98.3923	0.749931	100.05	0.0721985	1204.24	6.72547	7.47611	7.89556e-19	NM-254E	0.009459	3.5e-05	7.23021	1.00071	0.000698	7.8e-06	4e-05	2e-06	0.000273	2e-07	0.0123	0	0.008068
61411-230	CM-SS2	ARGUS VI (Obama)	2013-02-16	17.8333	4	299.804	0.227517	17.0955	0.0589994	0.2995	0.0749466	0.107759	0.398361	0.0028677	0.0015096	1.06567	0.0002916	1.2679	0.058	0.0064851	0.0105831	-0.0152	0.024	0.0132	0.015	0.004279	0.00023	17.4798	0.0672102	99.7192	0.184802	280.091	0.99861	1.3859	1.70955e-18	NM-254E	0.009459	3.5e-05	7.23218	1.00071	0.000698	7.8e-06	4e-05	2e-06	0.000273	2e-07	0.0123	0	0.008068
61411-231	CM-SS2	ARGUS VI (Obama)	2013-02-16	17.95	4	49.2541	0.151539	11.4332	0.0639304	0.1768	0.0730548	0.146105	0.315772	0.0024478	0.0009449	1.06567	0.0002916	1.2679	0.058	0.0061777	0.0105974	-0.0152	0.024	0.0132	0.015	0.004279	0.00023	4.23734	0.0367627	98.5439	0.719824	71.9359	0.612004	0.665339	1.14332e-18	NM-254E	0.009459	3.5e-05	7.2329	1.00071	0.000698	7.8e-06	4e-05	2e-06	0.000273	2e-07	0.0123	0	0.008068
61411-232	CM-SS2	ARGUS VI (Obama)	2013-02-16	18.0667	4	547.149	0.295743	7.44871	0.0619601	0.0895	0.072111	0.564946	0.363773	0.00112	0.0010486	1.06567	0.0002916	1.2679	0.058	0.0058703	0.010612	-0.0152	0.024	0.0132	0.015	0.004279	0.00023	73.4128	0.613529	99.9474	0.0955696	965.285	6.26946	6.85647	7.44871e-19	NM-254E	0.009459	3.5e-05	7.23362	1.00071	0.000698	7.8e-06	4e-05	2e-06	0.000273	2e-07	0.0123	0	0.008068
61411-233	CM-SS2	ARGUS VI (Obama)	2013-02-16	18.2	4	31.3351	0.151539	7.58181	0.0718418	0.0931	0.0825651	0.353759	0.384578	0.0001226	0.0009863	1.06567	0.0002916	1.2679	0.058	0.0055637	0.0106271	-0.0152	0.024	0.0132	0.015	0.004279	0.00023	4.12398	0.0587756	99.9752	1.16746	70.0478	0.979472	1.01194	7.58181e-19	NM-254E	0.009459	3.5e-05	7.23434	1.00071	0.000698	7.8e-06	4e-05	2e-06	0.000273	2e-07	0.0123	0	0.008068
61411-234	CM-SS2	ARGUS VI (Obama)	2013-02-16	18.3167	4	27.1571	0.142352	6.32753	0.0570428	0.0784	0.0777946	0	0.302318	0.0019427	0.001007	1.06567	0.0002916	1.2679	0.058	0.0052563	0.0106427	-0.0152	0.024	0.0132	0.015	0.004279	0.00023	4.19234	0.0648573	97.8642	1.33198	71.1866	1.08015	1.11061	6.32753e-19	NM-254E	0.009459	3.5e-05	7.23506	1.00071	0.000698	7.8e-06	4e-05	2e-06	0.000273	2e-07	0.0123	0	0.008068
61411-235	CM-SS2	ARGUS VI (Obama)	2013-02-16	18.4333	4	225.976	0.20824	4.8616	0.0521389	0.0297	0.0674166	-0.513017	0.384655	0.001039	0.0008933	1.06567	0.0002916	1.2679	0.058	0.0049462	0.0106589	-0.0152	0.024	0.0132	0.015	0.004279	0.00023	46.3978	0.502569	99.8438	0.176183	666.049	6.04764	6.39077	4.8616e-19	NM-254E	0.009459	3.5e-05	7.23578	1.00071	0.000698	7.8e-06	4e-05	2e-06	0.000273	2e-07	0.0123	0	0.008068
61411-236	CM-SS2	ARGUS VI (Obama)	2013-02-16	19.0167	4	38.8441	0.133282	3.35881	0.0501993	0.1371	0.072111	0.259165	0.3779	0.0032194	0.0011946	1.06567	0.0002916	1.2679	0.058	0.0034666	0.0107425	-0.0152	0.024	0.0132	0.015	0.004279	0.00023	11.2794	0.203412	97.5946	1.0381	185.567	3.18247	3.24876	3.35881e-19	NM-254E	0.009459	3.5e-05	7.23925	1.00071	0.000698	7.8e-06	4e-05	2e-06	0.000273	2e-07	0.0123	0	0.008068
61411-237	CM-SS2	ARGUS VI (Obama)	2013-02-16	19.1333	4	67.8251	0.189114	6.94276	0.0590317	0.1043	0.0749466	0.125975	0.309291	0.0013374	0.0010278	1.06567	0.0002916	1.2679	0.058	0.0031614	0.0107611	-0.0152	0.024	0.0132	0.015	0.004279	0.00023	9.70544	0.0976022	99.4283	0.600449	160.775	1.54785	1.6493	6.94276e-19	NM-254E	0.009459	3.5e-05	7.23996	1.00071	0.000698	7.8e-06	4e-05	2e-06	0.000273	2e-07	0.0123	0	0.008068
61411-238	CM-SS2	ARGUS VI (Obama)	2013-02-16	19.2667	4	260.005	0.2372	8.86643	0.0541236	0.1533	0.0787464	0.112955	0.371045	0.0022049	0.0009036	1.06567	0.0002916	1.2679	0.058	0.0028547	0.0107801	-0.0152	0.024	0.0132	0.015	0.004279	0.00023	29.244	0.183149	99.7516	0.16578	447.035	2.48403	2.88519	8.86643e-19	NM-254E	0.009459	3.5e-05	7.24068	1.00071	0.000698	7.8e-06	4e-05	2e-06	0.000273	2e-07	0.0123	0	0.008068
61411-239	CM-SS2	ARGUS VI (Obama)	2013-02-16	19.3833	4	1215.01	0.384401	15.5131	0.0619926	0.0433	0.0758947	0.13469	0.316143	0.0012735	0.0010382	1.06567	0.0002916	1.2679	0.058	0.0025473	0.0107997	-0.0152	0.024	0.0132	0.015	0.004279	0.00023	78.2898	0.314518	99.9691	0.0515247	1014.46	3.12877	4.25367	1.55131e-18	NM-254E	0.009459	3.5e-05	7.2414	1.00071	0.000698	7.8e-06	4e-05	2e-06	0.000273	2e-07	0.0123	0	0.008068
61411-240	CM-SS2	ARGUS VI (Obama)	2013-02-16	19.5	4	582.835	0.315379	6.20976	0.0570761	0.038	0.064622	0.210746	0.316175	0.0050193	0.0010278	1.06567	0.0002916	1.2679	0.058	0.0022407	0.0108196	-0.0152	0.024	0.0132	0.015	0.004279	0.00023	93.6136	0.863476	99.746	0.0928666	1160.88	7.92939	8.54362	6.20976e-19	NM-254E	0.009459	3.5e-05	7.24212	1.00071	0.000698	7.8e-06	4e-05	2e-06	0.000273	2e-07	0.0123	0	0.008068
61411-241	CM-SS2	ARGUS VI (Obama)	2013-02-16	19.6167	4	177.687	0.20824	2.43879	0.0619996	0.0287	0.0777946	-0.0028971	0.419897	0.0035316	0.0010902	1.06567	0.0002916	1.2679	0.058	0.0019348	0.0108399	-0.0152	0.024	0.0132	0.015	0.004279	0.00023	72.4188	1.84819	99.4075	0.247239	955.1	18.9915	19.1901	2.43879e-19	NM-254E	0.009459	3.5e-05	7.24284	1.00071	0.000698	7.8e-06	4e-05	2e-06	0.000273	2e-07	0.0123	0	0.008068
61411-242	CM-SS2	ARGUS VI (Obama)	2013-02-16	19.95	4	852.747	0.354773	12.1498	0.0679285	0.1782	0.0655515	-0.0623051	0.350531	-0.0010646	0.0015096	1.06567	0.0002916	1.2679	0.058	0.0011052	0.0108971	-0.0152	0.024	0.0132	0.015	0.004279	0.00023	70.2036	0.395389	100.037	0.0791128	932.194	4.11406	4.92251	1.21498e-18	NM-254E	0.009459	3.5e-05	7.24478	1.00071	0.000698	7.8e-06	4e-05	2e-06	0.000273	2e-07	0.0123	0	0.008068
61411-243	CM-SS2	ARGUS VI (Obama)	2013-02-16	20.0667	4	248.884	0.20824	3.64179	0.0600445	0.1424	0.0702282	0.0521677	0.385172	0.0080256	0.0015096	1.06567	0.0002916	1.2679	0.058	0.0007944	0.0109193	-0.0152	0.024	0.0132	0.015	0.004279	0.00023	67.6795	1.12438	99.0425	0.216127	905.741	11.8696	12.1605	3.64179e-19	NM-254E	0.009459	3.5e-05	7.24551	1.00071	0.000698	7.8e-06	4e-05	2e-06	0.000273	2e-07	0.0123	0	0.008068
61411-244	CM-SS2	ARGUS VI (Obama)	2013-02-16	20.2	4	165.088	0.20824	17.7909	0.0630029	0.3546	0.0787464	-0.17391	0.330003	-5.86e-05	0.001007	1.06567	0.0002916	1.2679	0.058	0.0004757	0.0109426	-0.0152	0.024	0.0132	0.015	0.004279	0.00023	9.27176	0.0387856	100.006	0.255449	153.884	0.617411	0.824285	1.77909e-18	NM-254E	0.009459	3.5e-05	7.24625	1.00071	0.000698	7.8e-06	4e-05	2e-06	0.000273	2e-07	0.0123	0	0.008068
61411-245	CM-SS2	ARGUS VI (Obama)	2013-02-16	20.3167	4	271.644	0.2372	15.2544	0.0699156	0.0778	0.0835225	0.395686	0.378305	0.0020898	0.0012993	1.06567	0.0002916	1.2679	0.058	0.000157	0.0109663	-0.0152	0.024	0.0132	0.015	0.004279	0.00023	17.7608	0.086746	99.7805	0.18894	284.262	1.28594	1.6133	1.52544e-18	NM-254E	0.009459	3.5e-05	7.247	1.00071	0.000698	7.8e-06	4e-05	2e-06	0.000273	2e-07	0.0123	0	0.008068
61411-246	CM-SS2	ARGUS VI (Obama)	2013-02-16	20.45	4	720.667	0.364642	6.73333	0.0600574	0.016	0.068352	-0.22323	0.336922	0.0022709	0.0011946	1.06567	0.0002916	1.2679	0.058	-0.0001553	0.0109899	-0.0152	0.024	0.0132	0.015	0.004279	0.00023	106.916	0.956711	99.9031	0.0870137	1279.13	8.23597	8.91232	6.73333e-19	NM-254E	0.009459	3.5e-05	7.24773	1.00071	0.000698	7.8e-06	4e-05	2e-06	0.000273	2e-07	0.0123	0	0.008068
61411-248	CM-SS2	ARGUS VI (Obama)	2013-02-16	21.15	4	690.786	0.325214	16.828	0.0571366	0.1686	0.0902497	-0.0108779	0.34399	-7.35e-05	0.0015096	1.06567	0.0002916	1.2679	0.058	-0.0019471	0.0111338	-0.0152	0.024	0.0132	0.015	0.004279	0.00023	41.0429	0.143252	100.003	0.0932433	600.45	1.78671	2.60387	1.6828e-18	NM-254E	0.009459	3.5e-05	7.25194	1.00071	0.000698	7.8e-06	4e-05	2e-06	0.000273	2e-07	0.0123	0	0.008068
61411-249	CM-SS2	ARGUS VI (Obama)	2013-02-16	21.2667	4	331.798	0.217862	9.18397	0.0709343	0.2087	0.08544	0.0050769	0.316635	0.0003474	0.0009863	1.06567	0.0002916	1.2679	0.058	-0.0022545	0.0111599	-0.0152	0.024	0.0132	0.015	0.004279	0.00023	36.1092	0.281818	99.9703	0.128596	537.856	3.63726	4.02533	9.18397e-19	NM-254E	0.009459	3.5e-05	7.25266	1.00071	0.000698	7.8e-06	4e-05	2e-06	0.000273	2e-07	0.0123	0	0.008068
61411-250	CM-SS2	ARGUS VI (Obama)	2013-02-16	21.3833	4	212.257	0.198656	22.3009	0.0650163	0.3236	0.0883233	-0.697049	0.448596	0.0066828	0.0018262	1.06567	0.0002916	1.2679	0.058	-0.0025597	0.0111862	-0.0152	0.024	0.0132	0.015	0.004279	0.00023	9.41787	0.0378585	99.0353	0.289019	156.208	0.601889	0.818054	2.23009e-18	NM-254E	0.009459	3.5e-05	7.25337	1.00071	0.000698	7.8e-06	4e-05	2e-06	0.000273	2e-07	0.0123	0	0.008068
61411-251	CM-SS2	ARGUS VI (Obama)	2013-02-16	21.5167	4	561.769	0.335058	17.7	0.071931	0.3057	0.0844808	-0.60209	0.344092	0.0040645	0.0010902	1.06567	0.0002916	1.2679	0.058	-0.0028664	0.011213	-0.0152	0.024	0.0132	0.015	0.004279	0.00023	31.6586	0.131378	99.7764	0.102344	479.494	1.75055	2.34536	1.77e-18	NM-254E	0.009459	3.5e-05	7.25409	1.00071	0.000698	7.8e-06	4e-05	2e-06	0.000273	2e-07	0.0123	0	0.008068
61411-252	CM-SS2	ARGUS VI (Obama)	2013-02-16	21.6333	4	2867.49	0.722332	30.8307	0.0620709	0.5405	0.0960469	0.134939	0.35792	0.0059262	0.0012993	1.06567	0.0002916	1.2679	0.058	-0.0031723	0.0112401	-0.0152	0.024	0.0132	0.015	0.004279	0.00023	92.943	0.189025	99.9391	0.0381052	1154.71	1.74169	3.61589	3.08307e-18	NM-254E	0.009459	3.5e-05	7.25481	1.00071	0.000698	7.8e-06	4e-05	2e-06	0.000273	2e-07	0.0123	0	0.008068
61411-253	CM-SS2	ARGUS VI (Obama)	2013-02-16	21.75	4	154.196	0.20824	5.33206	0.054223	0.3382	0.0655515	-0.776342	0.337285	0.0028667	0.0010694	1.06567	0.0002916	1.2679	0.058	-0.003479	0.0112676	-0.0152	0.024	0.0132	0.015	0.004279	0.00023	28.7381	0.300963	99.4134	0.28168	440.16	4.09729	4.34551	5.33206e-19	NM-254E	0.009459	3.5e-05	7.25553	1.00071	0.000698	7.8e-06	4e-05	2e-06	0.000273	2e-07	0.0123	0	0.008068
61411-254	CM-SS2	ARGUS VI (Obama)	2013-02-16	21.8667	4	537.003	0.276159	17.8095	0.06405	0.129	0.0787464	0.733607	0.371843	0.0007108	0.0010902	1.06567	0.0002916	1.2679	0.058	-0.0037856	0.0112955	-0.0152	0.024	0.0132	0.015	0.004279	0.00023	30.1366	0.11105	99.9708	0.0947907	459.101	1.49627	2.12044	1.78095e-18	NM-254E	0.009459	3.5e-05	7.25625	1.00071	0.000698	7.8e-06	4e-05	2e-06	0.000273	2e-07	0.0123	0	0.008068
61411-255	CM-SS2	ARGUS VI (Obama)	2013-02-16	22.2	4	95.7421	0.198656	6.03219	0.0630791	0.0146	0.0655515	-0.43404	0.385846	0.0027068	0.0009967	1.06567	0.0002916	1.2679	0.058	-0.0046102	0.0113725	-0.0152	0.024	0.0132	0.015	0.004279	0.00023	15.723	0.174939	99.1171	0.427621	253.8	2.63685	2.77883	6.03219e-19	NM-254E	0.009459	3.5e-05	7.25819	1.00071	0.000698	7.8e-06	4e-05	2e-06	0.000273	2e-07	0.0123	0	0.008068
61411-256	CM-SS2	ARGUS VI (Obama)	2013-02-16	22.5167	4	522.245	0.25664	18.2812	0.0749338	0.2315	0.0864002	0.200378	0.413888	0.002175	0.0014043	1.06567	0.0002916	1.2679	0.058	-0.0054122	0.01145	-0.0152	0.024	0.0132	0.015	0.004279	0.00023	28.525	0.120024	99.879	0.106275	437.257	1.6366	2.17939	1.82812e-18	NM-254E	0.009459	3.5e-05	7.26007	1.00071	0.000698	7.8e-06	4e-05	2e-06	0.000273	2e-07	0.0123	0	0.008068
61411-257	CM-SS2	ARGUS VI (Obama)	2013-02-16	22.6333	4	84.3491	0.189114	6.24515	0.0699982	0.0254	0.076844	0.767466	0.372076	0.0001801	0.000883	1.06567	0.0002916	1.2679	0.058	-0.0057209	0.0114805	-0.0152	0.024	0.0132	0.015	0.004279	0.00023	13.5004	0.160166	100.007	0.446561	219.99	2.45918	2.57601	6.24515e-19	NM-254E	0.009459	3.5e-05	7.2608	1.00071	0.000698	7.8e-06	4e-05	2e-06	0.000273	2e-07	0.0123	0	0.008068
61411-258	CM-SS2	ARGUS VI (Obama)	2013-02-16	22.75	4	243.276	0.160823	19.8826	0.0690164	0.2521	0.0960469	-0.144504	0.365176	0.0025129	0.0010486	1.06567	0.0002916	1.2679	0.058	-0.0060276	0.0115111	-0.0152	0.024	0.0132	0.015	0.004279	0.00023	12.1892	0.0459127	99.6873	0.159371	199.747	0.712781	0.999168	1.98826e-18	NM-254E	0.009459	3.5e-05	7.26152	1.00071	0.000698	7.8e-06	4e-05	2e-06	0.000273	2e-07	0.0123	0	0.008068
61411-259	CM-SS2	ARGUS VI (Obama)	2013-02-16	22.8667	4	363.051	0.189114	16.2173	0.0680352	0.1686	0.0730548	0.258535	0.365212	-0.0014546	0.0007501	1.06567	0.0002916	1.2679	0.058	-0.0063321	0.0115419	-0.0152	0.024	0.0132	0.015	0.004279	0.00023	22.4067	0.0957811	100.125	0.0964354	351.87	1.36839	1.80984	1.62173e-18	NM-254E	0.009459	3.5e-05	7.26223	1.00071	0.000698	7.8e-06	4e-05	2e-06	0.000273	2e-07	0.0123	0	0.008068
61411-260	CM-SS2	ARGUS VI (Obama)	2013-02-16	23.2667	4	167.001	0.246909	8.65507	0.0533257	0.0542	0.0873613	-0.199049	0.337704	0.000812	0.0010382	1.06567	0.0002916	1.2679	0.058	-0.007322	0.0116444	-0.0152	0.024	0.0132	0.015	0.004279	0.00023	19.2567	0.127256	99.8438	0.279848	306.304	1.8639	2.13618	8.65507e-19	NM-254E	0.009459	3.5e-05	7.26456	1.00071	0.000698	7.8e-06	4e-05	2e-06	0.000273	2e-07	0.0123	0	0.008068
61411-261	CM-SS2	ARGUS VI (Obama)	2013-02-16	23.3833	4	111.849	0.179622	9.15603	0.0670726	0.0766	0.0787464	-0.206334	0.379259	0.0046261	0.0014043	1.06567	0.0002916	1.2679	0.058	-0.0076294	0.0116769	-0.0152	0.024	0.0132	0.015	0.004279	0.00023	12.055	0.101477	98.7501	0.438143	197.662	1.57719	1.72284	9.15603e-19	NM-254E	0.009459	3.5e-05	7.26528	1.00071	0.000698	7.8e-06	4e-05	2e-06	0.000273	2e-07	0.0123	0	0.008068
61411-262	CM-SS2	ARGUS VI (Obama)	2013-02-16	23.5	4	122.383	0.151539	11.8784	0.0592123	0.1982	0.0864002	-0.635775	0.290095	0.0036361	0.0010798	1.06567	0.0002916	1.2679	0.058	-0.0079367	0.0117098	-0.0152	0.024	0.0132	0.015	0.004279	0.00023	10.1992	0.0590802	99.0737	0.31632	168.588	0.932948	1.10704	1.18784e-18	NM-254E	0.009459	3.5e-05	7.266	1.00071	0.000698	7.8e-06	4e-05	2e-06	0.000273	2e-07	0.0123	0	0.008068
61411-263	CM-SS2	ARGUS VI (Obama)	2013-02-16	23.6167	4	178.295	0.189114	11.456	0.0572586	0.1253	0.0664831	-0.139521	0.3863	-0.001672	0.0011946	1.06567	0.0002916	1.2679	0.058	-0.0082427	0.0117429	-0.0152	0.024	0.0132	0.015	0.004279	0.00023	15.5977	0.0856288	100.273	0.250618	251.912	1.29201	1.55809	1.1456e-18	NM-254E	0.009459	3.5e-05	7.26672	1.00071	0.000698	7.8e-06	4e-05	2e-06	0.000273	2e-07	0.0123	0	0.008068
61411-264	CM-SS2	ARGUS VI (Obama)	2013-02-16	23.75	4	26.5181	0.160823	6.13721	0.0829002	0.0495	0.0844808	-0.705669	0.365474	0.00047	0.0011946	1.06567	0.0002916	1.2679	0.058	-0.0085507	0.0117765	-0.0152	0.024	0.0132	0.015	0.004279	0.00023	4.28008	0.086209	99.2492	1.59834	72.6473	1.4346	1.45861	6.13721e-19	NM-254E	0.009459	3.5e-05	7.26745	1.00071	0.000698	7.8e-06	4e-05	2e-06	0.000273	2e-07	0.0123	0	0.008068
61411-265	CM-SS2	ARGUS VI (Obama)	2013-02-16	23.8667	4	38.7961	0.124354	8.71735	0.0484956	0.1991	0.074	0.338697	0.331001	-0.00211	0.001007	1.06567	0.0002916	1.2679	0.058	-0.0088588	0.0118105	-0.0152	0.024	0.0132	0.015	0.004279	0.00023	4.5183	0.0450941	101.706	0.902915	76.6073	0.748787	0.798593	8.71735e-19	NM-254E	0.009459	3.5e-05	7.26817	1.00071	0.000698	7.8e-06	4e-05	2e-06	0.000273	2e-07	0.0123	0	0.008068
61411-266	CM-SS2	ARGUS VI (Obama)	2013-02-17	0.383333	4	26.7451	0.160823	0.963166	0.0602428	0.0734	0.0806536	-0.149061	0.338017	0.0008216	0.0015096	1.06567	0.0002916	1.2679	0.058	-0.0101815	0.0119603	-0.0152	0.024	0.0132	0.015	0.004279	0.00023	27.4932	1.79039	99.05	1.88639	423.133	24.6021	24.6418	9.63165e-20	NM-254E	0.009459	3.5e-05	7.27128	1.00071	0.000698	7.8e-06	4e-05	2e-06	0.000273	2e-07	0.0123	0	0.008068
61411-267	CM-SS2	ARGUS VI (Obama)	2013-02-17	0.516667	4	79.7811	0.133282	7.97386	0.0592698	0.0231	0.0787464	0.151258	0.290335	0.0002142	0.0012993	1.06567	0.0002916	1.2679	0.058	-0.0104959	0.0119967	-0.0152	0.024	0.0132	0.015	0.004279	0.00023	9.99048	0.0904006	99.9308	0.541025	165.289	1.43011	1.54506	7.97386e-19	NM-254E	0.009459	3.5e-05	7.27202	1.00071	0.000698	7.8e-06	4e-05	2e-06	0.000273	2e-07	0.0123	0	0.008068
61411-268	CM-SS2	ARGUS VI (Obama)	2013-02-17	0.633333	4	677.935	0.335058	7.51914	0.0582977	0.0669	0.0902497	-0.299637	0.317512	0.0020472	0.0011946	1.06567	0.0002916	1.2679	0.058	-0.0108047	0.0120329	-0.0152	0.024	0.0132	0.015	0.004279	0.00023	90.0661	0.701397	99.9062	0.0874906	1128.01	6.55771	7.2603	7.51914e-19	NM-254E	0.009459	3.5e-05	7.27275	1.00071	0.000698	7.8e-06	4e-05	2e-06	0.000273	2e-07	0.0123	0	0.008068
61411-269	CM-SS2	ARGUS VI (Obama)	2013-02-17	0.75	4	691.369	0.344912	12.1841	0.0524459	0.1832	0.0796994	-0.640065	0.324384	0.0001503	0.0011946	1.06567	0.0002916	1.2679	0.058	-0.0111113	0.0120691	-0.0152	0.024	0.0132	0.015	0.004279	0.00023	56.7257	0.247589	99.9862	0.0874384	786.293	2.78993	3.65757	1.21841e-18	NM-254E	0.009459	3.5e-05	7.27347	1.00071	0.000698	7.8e-06	4e-05	2e-06	0.000273	2e-07	0.0123	0	0.008068
61411-270	CM-SS2	ARGUS VI (Obama)	2013-02-17	0.866667	4	41.2922	0.0623939	10.8566	0.0147449	0.1428	0.0306105	0.125116	0.135308	0.0006607	0.0002995	1.06567	0.0002916	1.2679	0.058	-0.0114173	0.0121055	-0.0152	0.024	0.0132	0.015	0.004279	0.00023	3.77821	0.011322	99.5479	0.305457	64.2767	0.189272	0.300738	1.08566e-18	NM-254E	0.009459	3.5e-05	7.27419	1.00071	0.000698	7.8e-06	4e-05	2e-06	0.000273	2e-07	0.0123	0	0.008068
61411-271	CM-SS2	ARGUS VI (Obama)	2013-02-17	1.13333	4	859.448	0.344912	14.2317	0.0612685	0.124	0.0825651	0.245921	0.310821	0.0015878	0.0010902	1.06567	0.0002916	1.2679	0.058	-0.0120843	0.012186	-0.0152	0.024	0.0132	0.015	0.004279	0.00023	60.3504	0.261992	99.947	0.0682538	826.688	2.88779	3.79444	1.42317e-18	NM-254E	0.009459	3.5e-05	7.27576	1.00071	0.000698	7.8e-06	4e-05	2e-06	0.000273	2e-07	0.0123	0	0.008068
61411-272	CM-SS2	ARGUS VI (Obama)	2013-02-17	1.51667	4	1148.33	0.364642	22.9678	0.0652191	0.3309	0.0844808	-0.064775	0.331453	0.0035498	0.0014043	1.06567	0.0002916	1.2679	0.058	-0.0130749	0.0123082	-0.0152	0.024	0.0132	0.015	0.004279	0.00023	49.943	0.143896	99.9076	0.0578772	708.221	1.69213	2.75422	2.29678e-18	NM-254E	0.009459	3.5e-05	7.27809	1.00071	0.000698	7.8e-06	4e-05	2e-06	0.000273	2e-07	0.0123	0	0.008068
61411-273	CM-SS2	ARGUS VI (Obama)	2013-02-17	1.65	4	101.787	0.198656	5.14894	0.045732	0.0925	0.074	-0.0698766	0.324622	0.0022017	0.0009346	1.06567	0.0002916	1.2679	0.058	-0.0133823	0.0123467	-0.0152	0.024	0.0132	0.015	0.004279	0.00023	19.632	0.186765	99.3509	0.389057	311.794	2.72731	2.92635	5.14894e-19	NM-254E	0.009459	3.5e-05	7.27881	1.00071	0.000698	7.8e-06	4e-05	2e-06	0.000273	2e-07	0.0123	0	0.008068
61411-274	CM-SS2	ARGUS VI (Obama)	2013-02-17	1.76667	4	98.1451	0.160823	13.3786	0.0583716	0.1374	0.0787464	-0.169613	0.352213	-0.0008302	0.0014043	1.06567	0.0002916	1.2679	0.058	-0.0136917	0.0123858	-0.0152	0.024	0.0132	0.015	0.004279	0.00023	7.34521	0.0464516	100.237	0.486877	122.956	0.752043	0.871311	1.33786e-18	NM-254E	0.009459	3.5e-05	7.27954	1.00071	0.000698	7.8e-06	4e-05	2e-06	0.000273	2e-07	0.0123	0	0.008068
61411-276	CM-SS2	ARGUS VI (Obama)	2013-02-17	2.2	4	1223.26	0.335058	14.5146	0.0642794	-0.0522	0.0835225	-0.0793755	0.345423	0.0030137	0.0010902	1.06567	0.0002916	1.2679	0.058	-0.0148025	0.0125285	-0.0152	0.024	0.0132	0.015	0.004279	0.00023	84.2063	0.374351	99.9251	0.0470171	1072.39	3.60798	4.69419	1.45146e-18	NM-254E	0.009459	3.5e-05	7.28216	1.00071	0.000698	7.8e-06	4e-05	2e-06	0.000273	2e-07	0.0123	0	0.008068
61411-277	CM-SS2	ARGUS VI (Obama)	2013-02-17	2.31667	4	420.004	0.295743	4.75579	0.0545086	0.0558	0.0749466	-0.308794	0.373208	-0.0005286	0.0008727	1.06567	0.0002916	1.2679	0.058	-0.0151084	0.0125685	-0.0152	0.024	0.0132	0.015	0.004279	0.00023	88.33	1.01589	100.031	0.117514	1111.7	9.58307	10.0668	4.75579e-19	NM-254E	0.009459	3.5e-05	7.28288	1.00071	0.000698	7.8e-06	4e-05	2e-06	0.000273	2e-07	0.0123	0	0.008068
61411-278	CM-SS2	ARGUS VI (Obama)	2013-02-17	2.65	4	122.384	0.198656	8.43303	0.0545341	0.0911	0.0873613	-0.322718	0.33176	-0.0003645	0.0009242	1.06567	0.0002916	1.2679	0.058	-0.0159393	0.0126784	-0.0152	0.024	0.0132	0.015	0.004279	0.00023	14.5137	0.102244	100.067	0.322484	235.482	1.55662	1.75828	8.43303e-19	NM-254E	0.009459	3.5e-05	7.28484	1.00071	0.000698	7.8e-06	4e-05	2e-06	0.000273	2e-07	0.0123	0	0.008068
61411-279	CM-SS2	ARGUS VI (Obama)	2013-02-17	2.76667	4	96.9931	0.179622	7.49788	0.0731669	0.0488	0.0636946	0.265194	0.338681	0.0004391	0.0009863	1.06567	0.0002916	1.2679	0.058	-0.016246	0.0127194	-0.0152	0.024	0.0132	0.015	0.004279	0.00023	12.9135	0.134273	99.8851	0.401701	210.956	2.07182	2.1991	7.49788e-19	NM-254E	0.009459	3.5e-05	7.28556	1.00071	0.000698	7.8e-06	4e-05	2e-06	0.000273	2e-07	0.0123	0	0.008068
61411-280	CM-SS2	ARGUS VI (Obama)	2013-02-17	2.88333	4	199.368	0.170188	2.32491	0.0506704	-0.0274	0.076844	-0.306024	0.29767	-0.0006138	0.0009449	1.06567	0.0002916	1.2679	0.058	-0.0165547	0.012761	-0.0152	0.024	0.0132	0.015	0.004279	0.00023	85.804	1.87552	100.078	0.186257	1087.72	17.9253	18.1804	2.32491e-19	NM-254E	0.009459	3.5e-05	7.28629	1.00071	0.000698	7.8e-06	4e-05	2e-06	0.000273	2e-07	0.0123	0	0.008068
61411-281	CM-SS2	ARGUS VI (Obama)	2013-02-17	3.01667	4	167.316	0.160823	37.7122	0.0820639	0.6513	0.0777946	-0.58952	0.338748	0.0111906	0.001932	1.06567	0.0002916	1.2679	0.058	-0.0168628	0.0128028	-0.0152	0.024	0.0132	0.015	0.004279	0.00023	4.33908	0.0184756	97.9799	0.370534	73.6289	0.307287	0.407102	3.77122e-18	NM-254E	0.009459	3.5e-05	7.28702	1.00071	0.000698	7.8e-06	4e-05	2e-06	0.000273	2e-07	0.0123	0	0.008068
61411-282	CM-SS2	ARGUS VI (Obama)	2013-02-17	3.13333	4	1337.13	0.414082	14.1324	0.0771327	0.1272	0.08544	0.33888	0.30452	0.0032087	0.0012993	1.06567	0.0002916	1.2679	0.058	-0.0171716	0.0128449	-0.0152	0.024	0.0132	0.015	0.004279	0.00023	94.5421	0.51762	99.9304	0.052529	1169.39	4.73132	5.7105	1.41324e-18	NM-254E	0.009459	3.5e-05	7.28774	1.00071	0.000698	7.8e-06	4e-05	2e-06	0.000273	2e-07	0.0123	0	0.008068
61411-283	CM-SS2	ARGUS VI (Obama)	2013-02-17	3.25	4	661.75	0.276159	6.59447	0.065331	0.0842	0.074	-0.237604	0.387456	-0.0016188	0.0011946	1.06567	0.0002916	1.2679	0.058	-0.0174775	0.012887	-0.0152	0.024	0.0132	0.015	0.004279	0.00023	100.409	0.99719	100.07	0.0800225	1222.24	8.85541	9.45008	6.59447e-19	NM-254E	0.009459	3.5e-05	7.28847	1.00071	0.000698	7.8e-06	4e-05	2e-06	0.000273	2e-07	0.0123	0	0.008068
61411-284	CM-SS2	ARGUS VI (Obama)	2013-02-17	3.83333	4	57.2651	0.133282	5.10049	0.0565777	0.0554	0.0777946	0.106463	0.380653	0.0005019	0.0011946	1.06567	0.0002916	1.2679	0.058	-0.0189677	0.0130952	-0.0152	0.024	0.0132	0.015	0.004279	0.00023	11.1918	0.145038	99.7531	0.705854	184.195	2.27087	2.36163	5.10049e-19	NM-254E	0.009459	3.5e-05	7.29198	1.00071	0.000698	7.8e-06	4e-05	2e-06	0.000273	2e-07	0.0123	0	0.008068
61411-285	CM-SS2	ARGUS VI (Obama)	2013-02-17	3.96667	4	451.905	0.276159	6.37401	0.0565878	0.0927	0.0758947	0.620609	0.291161	0.0008419	0.0009552	1.06567	0.0002916	1.2679	0.058	-0.0192757	0.0131389	-0.0152	0.024	0.0132	0.015	0.004279	0.00023	70.8635	0.632337	99.9558	0.107072	939.048	6.55494	7.09615	6.37401e-19	NM-254E	0.009459	3.5e-05	7.29271	1.00071	0.000698	7.8e-06	4e-05	2e-06	0.000273	2e-07	0.0123	0	0.008068
61411-286	CM-SS2	ARGUS VI (Obama)	2013-02-17	4.08333	4	620.018	0.325214	7.11204	0.0478859	0.0542	0.0806536	-0.757788	0.373749	0.0002856	0.0010382	1.06567	0.0002916	1.2679	0.058	-0.0195852	0.0131831	-0.0152	0.024	0.0132	0.015	0.004279	0.00023	87.1432	0.590187	99.9761	0.0895384	1100.47	5.60158	6.38308	7.11204e-19	NM-254E	0.009459	3.5e-05	7.29344	1.00071	0.000698	7.8e-06	4e-05	2e-06	0.000273	2e-07	0.0123	0	0.008068
61411-287	CM-SS2	ARGUS VI (Obama)	2013-02-17	4.2	4	613.88	0.285944	11.1675	0.0595315	0.1939	0.0950789	-0.403367	0.345992	0.0007907	0.0010902	1.06567	0.0002916	1.2679	0.058	-0.0198926	0.0132273	-0.0152	0.024	0.0132	0.015	0.004279	0.00023	54.9368	0.29547	99.9567	0.0846298	766.023	3.36655	4.08632	1.11675e-18	NM-254E	0.009459	3.5e-05	7.29416	1.00071	0.000698	7.8e-06	4e-05	2e-06	0.000273	2e-07	0.0123	0	0.008068
61411-288	CM-SS2	ARGUS VI (Obama)	2013-02-17	4.31667	4	110.798	0.189114	8.79505	0.0683504	0.1247	0.0902497	-1.20293	0.304818	0.0010028	0.0011946	1.06567	0.0002916	1.2679	0.058	-0.0201978	0.0132714	-0.0152	0.024	0.0132	0.015	0.004279	0.00023	12.5435	0.107816	99.6424	0.402516	205.238	1.66879	1.81685	8.79505e-19	NM-254E	0.009459	3.5e-05	7.29488	1.00071	0.000698	7.8e-06	4e-05	2e-06	0.000273	2e-07	0.0123	0	0.008068
61410-01	CM-Ash1	ARGUS VI (Obama)	2012-11-30	11.7833	3	773.554	0.434166	4.533	0.0753244	0.1402	0.125284	0.152964	0.0946776	0.0074871	0.0020684	1.05765	0.0003232	2.333	0.11	0.0211	0.014	0.0028	0.036	0.0153	0.017	0.007981	0.00049	170.156	2.83256	99.7133	0.112401	1765.24	18.8551	18.9693	4.533e-19	NM-254E	0.0095388	1.75e-05	1.54197	1.00015	0.000698	7.8e-06	4e-05	2e-06	0.000273	2e-07	0.0123	0	0.008068
61410-02	CM-Ash1	ARGUS VI (Obama)	2012-11-30	11.9167	3	108.663	0.21095	19.4903	0.0901084	0.2742	0.134892	0.0982349	0.0799839	0.0060381	0.0019658	1.05765	0.0003232	2.333	0.11	0.0211	0.014	0.0028	0.036	0.0153	0.017	0.007981	0.00049	5.47529	0.0407849	98.3494	0.604886	93.1896	0.676787	0.697012	1.94903e-18	NM-254E	0.0095388	1.75e-05	1.54215	1.00015	0.000698	7.8e-06	4e-05	2e-06	0.000273	2e-07	0.0123	0	0.008068
61410-03	CM-Ash1	ARGUS VI (Obama)	2012-11-30	12.0667	3	358.228	0.328938	36.6996	0.14072	0.7302	0.144555	0.363681	0.0961825	0.0102899	0.0023779	1.05765	0.0003232	2.333	0.11	0.0211	0.014	0.0028	0.036	0.0153	0.017	0.007981	0.00049	9.67042	0.0427844	99.1525	0.236534	161.513	0.683955	0.740428	3.66996e-18	NM-254E	0.0095388	1.75e-05	1.54233	1.00015	0.000698	7.8e-06	4e-05	2e-06	0.000273	2e-07	0.0123	0	0.008068
61410-04	CM-Ash1	ARGUS VI (Obama)	2012-12-01	6.13333	3	7119.96	1.20503	96.0403	0.190546	1.4262	0.144555	0.369129	0.0976232	0.0559381	0.0041539	1.05765	0.0003232	2.333	0.11	0.0211	0.014	0.0028	0.036	0.0153	0.017	0.007981	0.00049	73.954	0.147841	99.7663	0.0295642	977.153	1.51364	2.05444	9.60403e-18	NM-254E	0.0095388	1.75e-05	1.56543	1.00016	0.000698	7.8e-06	4e-05	2e-06	0.000273	2e-07	0.0123	0	0.008068
61410-05	CM-Ash1	ARGUS VI (Obama)	2012-12-01	6.26667	3	453.208	0.170294	113.287	0.03131	1.4264	0.052345	0.512891	0.0344788	0.0427323	0.0008358	1.05765	0.0003232	2.333	0.11	0.0211	0.014	0.0028	0.036	0.0153	0.017	0.007981	0.00049	3.88044	0.0028729	97.1938	0.0761263	66.5315	0.0483727	0.12926	1.13287e-17	NM-254E	0.0095388	1.75e-05	1.5656	1.00016	0.000698	7.8e-06	4e-05	2e-06	0.000273	2e-07	0.0123	0	0.008068
61410-06	CM-Ash1	ARGUS VI (Obama)	2012-12-01	6.48333	3	2485.84	0.600167	30.2758	0.130773	0.4562	0.144555	0.264792	0.0812152	0.0341716	0.0035245	1.05765	0.0003232	2.333	0.11	0.0211	0.014	0.0028	0.036	0.0153	0.017	0.007981	0.00049	81.7633	0.355458	99.5912	0.0542857	1055.41	3.48698	3.78476	3.02758e-18	NM-254E	0.0095388	1.75e-05	1.56589	1.00016	0.000698	7.8e-06	4e-05	2e-06	0.000273	2e-07	0.0123	0	0.008068
61410-07	CM-Ash1	ARGUS VI (Obama)	2012-12-01	6.83333	3	456.507	0.405216	39.4823	0.150676	0.5232	0.134892	-0.0863054	0.0695215	0.0402637	0.0041539	1.05765	0.0003232	2.333	0.11	0.0211	0.014	0.0028	0.036	0.0153	0.017	0.007981	0.00049	11.2502	0.0541697	97.3684	0.298334	186.595	0.854178	0.91408	3.94823e-18	NM-254E	0.0095388	1.75e-05	1.56634	1.00016	0.000698	7.8e-06	4e-05	2e-06	0.000273	2e-07	0.0123	0	0.008068
61410-08	CM-Ash1	ARGUS VI (Obama)	2012-12-01	6.96667	3	898.235	0.357351	41.1485	0.120833	0.5332	0.134892	0.0477785	0.108282	0.003045	0.0018636	1.05765	0.0003232	2.333	0.11	0.0211	0.014	0.0028	0.036	0.0153	0.017	0.007981	0.00049	21.7991	0.0660186	99.8994	0.0836138	345.807	0.954299	1.11574	4.11485e-18	NM-254E	0.0095388	1.75e-05	1.56651	1.00016	0.000698	7.8e-06	4e-05	2e-06	0.000273	2e-07	0.0123	0	0.008068
61410-09	CM-Ash1	ARGUS VI (Obama)	2012-12-01	7.3	3	331.118	0.310161	17.1273	0.100991	0.3772	0.134892	0.0499855	0.0753764	0.0056468	0.0016604	1.05765	0.0003232	2.333	0.11	0.0211	0.014	0.0028	0.036	0.0153	0.017	0.007981	0.00049	19.2269	0.118436	99.4934	0.199571	308.242	1.74748	1.82334	1.71273e-18	NM-254E	0.0095388	1.75e-05	1.56695	1.00016	0.000698	7.8e-06	4e-05	2e-06	0.000273	2e-07	0.0123	0	0.008068
61410-10	CM-Ash1	ARGUS VI (Obama)	2012-12-01	7.43333	3	1124.92	0.4245	86.8589	0.160637	0.9352	0.125284	0.195889	0.100747	0.0409512	0.0028974	1.05765	0.0003232	2.333	0.11	0.0211	0.014	0.0028	0.036	0.0153	0.017	0.007981	0.00049	12.8027	0.0261546	98.9158	0.0933848	210.914	0.406977	0.547	8.68589e-18	NM-254E	0.0095388	1.75e-05	1.56711	1.00016	0.000698	7.8e-06	4e-05	2e-06	0.000273	2e-07	0.0123	0	0.008068
61410-11	CM-Ash1	ARGUS VI (Obama)	2012-12-01	7.56667	3	439.016	0.300832	39.0857	0.100991	0.4172	0.134892	-0.0896487	0.0842552	0.0090207	0.0023779	1.05765	0.0003232	2.333	0.11	0.0211	0.014	0.0028	0.036	0.0153	0.017	0.007981	0.00049	11.1551	0.0349278	99.3854	0.188257	185.094	0.551213	0.638864	3.90857e-18	NM-254E	0.0095388	1.75e-05	1.56729	1.00016	0.000698	7.8e-06	4e-05	2e-06	0.000273	2e-07	0.0123	0	0.008068
61410-12	CM-Ash1	ARGUS VI (Obama)	2012-12-01	7.91667	3	18582	3.60168	278.174	0.680254	3.4702	0.134892	0.720061	0.117507	0.211254	0.0064706	1.05765	0.0003232	2.333	0.11	0.0211	0.014	0.0028	0.036	0.0153	0.017	0.007981	0.00049	66.5658	0.163463	99.6615	0.0292703	899.903	1.74573	2.17912	2.78174e-17	NM-254E	0.0095388	1.75e-05	1.56774	1.00016	0.000698	7.8e-06	4e-05	2e-06	0.000273	2e-07	0.0123	0	0.008068
61410-13	CM-Ash1	ARGUS VI (Obama)	2012-12-01	8.05	3	1717.73	0.521728	58.8614	0.140721	0.7442	0.134892	0.146443	0.0768914	0.0138647	0.0026892	1.05765	0.0003232	2.333	0.11	0.0211	0.014	0.0028	0.036	0.0153	0.017	0.007981	0.00049	29.1046	0.0714717	99.7601	0.0634004	448.475	0.976774	1.21926	5.88614e-18	NM-254E	0.0095388	1.75e-05	1.56791	1.00016	0.000698	7.8e-06	4e-05	2e-06	0.000273	2e-07	0.0123	0	0.008068
61410-14	CM-Ash1	ARGUS VI (Obama)	2012-12-01	8.18333	3	284.65	0.254951	44.5131	0.130773	0.5682	0.125284	0.194441	0.0783725	0.0085342	0.0023779	1.05765	0.0003232	2.333	0.11	0.0211	0.014	0.0028	0.036	0.0153	0.017	0.007981	0.00049	6.32993	0.0251591	99.1111	0.279426	107.317	0.414282	0.456286	4.45131e-18	NM-254E	0.0095388	1.75e-05	1.56808	1.00016	0.000698	7.8e-06	4e-05	2e-06	0.000273	2e-07	0.0123	0	0.008068
61410-15	CM-Ash1	ARGUS VI (Obama)	2012-12-01	8.31667	3	1428.17	0.482701	120.358	0.410305	1.6342	0.134892	0.384221	0.0857961	0.0859965	0.0040489	1.05765	0.0003232	2.333	0.11	0.0211	0.014	0.0028	0.036	0.0153	0.017	0.007981	0.00049	11.6453	0.0411687	98.2067	0.0969306	192.815	0.646968	0.728899	1.20358e-17	NM-254E	0.0095388	1.75e-05	1.56825	1.00016	0.000698	7.8e-06	4e-05	2e-06	0.000273	2e-07	0.0123	0	0.008068
61410-16	CM-Ash1	ARGUS VI (Obama)	2012-12-01	8.65	3	9082.72	2.20275	235.414	0.690253	3.0842	0.144555	1.34844	0.0828436	0.289721	0.0052064	1.05765	0.0003232	2.333	0.11	0.0211	0.014	0.0028	0.036	0.0153	0.017	0.007981	0.00049	38.2077	0.112636	99.0505	0.0381797	568.837	1.44138	1.69771	2.35414e-17	NM-254E	0.0095388	1.75e-05	1.56868	1.00016	0.000698	7.8e-06	4e-05	2e-06	0.000273	2e-07	0.0123	0	0.008068
61410-17	CM-Ash1	ARGUS VI (Obama)	2012-12-01	9	3	9423.19	1.90318	257.558	0.350336	3.2342	0.134892	0.506831	0.0993649	0.0709779	0.0030018	1.05765	0.0003232	2.333	0.11	0.0211	0.014	0.0028	0.036	0.0153	0.017	0.007981	0.00049	36.4967	0.0503219	99.7759	0.0300764	546.81	0.651758	1.08483	2.57557e-17	NM-254E	0.0095388	1.75e-05	1.56914	1.00016	0.000698	7.8e-06	4e-05	2e-06	0.000273	2e-07	0.0123	0	0.008068
61410-18	CM-Ash1	ARGUS VI (Obama)	2012-12-01	9.13333	3	298.519	0.117392	57.8591	0.0220263	0.8216	0.0509117	0.929658	0.0345604	0.182271	0.0011099	1.05765	0.0003232	2.333	0.11	0.0211	0.014	0.0028	0.036	0.0153	0.017	0.007981	0.00049	4.21394	0.006276	81.8017	0.122099	72.1382	0.105348	0.16715	5.78591e-18	NM-254E	0.0095388	1.75e-05	1.56931	1.00016	0.000698	7.8e-06	4e-05	2e-06	0.000273	2e-07	0.0123	0	0.008068
61410-19	CM-Ash1	ARGUS VI (Obama)	2012-12-01	9.36667	3	16560.5	3.80159	236.2	0.920255	2.7012	0.144555	0.43886	0.0682188	0.067255	0.0041539	1.05765	0.0003232	2.333	0.11	0.0211	0.014	0.0028	0.036	0.0153	0.017	0.007981	0.00049	70.0193	0.273358	99.8792	0.0332989	936.419	2.8617	3.16193	2.362e-17	NM-254E	0.0095388	1.75e-05	1.5696	1.00016	0.000698	7.8e-06	4e-05	2e-06	0.000273	2e-07	0.0123	0	0.008068
61410-20	CM-Ash1	ARGUS VI (Obama)	2012-12-01	9.5	3	615.607	0.291548	79.5808	0.140721	0.8952	0.144555	0.304849	0.079935	0.0131561	0.0022745	1.05765	0.0003232	2.333	0.11	0.0211	0.014	0.0028	0.036	0.0153	0.017	0.007981	0.00049	7.67861	0.0164539	99.3663	0.128909	129.391	0.267691	0.352399	7.95808e-18	NM-254E	0.0095388	1.75e-05	1.56977	1.00016	0.000698	7.8e-06	4e-05	2e-06	0.000273	2e-07	0.0123	0	0.008068
61410-21	CM-Ash1	ARGUS VI (Obama)	2012-12-01	9.63333	3	927.285	0.434166	18.561	0.0881335	0.2022	0.134892	0.149929	0.0682337	0.0026748	0.0020684	1.05765	0.0003232	2.333	0.11	0.0211	0.014	0.0028	0.036	0.0153	0.017	0.007981	0.00049	49.9087	0.240478	99.9153	0.0938225	712.763	2.84467	3.0439	1.8561e-18	NM-254E	0.0095388	1.75e-05	1.56994	1.00016	0.000698	7.8e-06	4e-05	2e-06	0.000273	2e-07	0.0123	0	0.008068
61410-22	CM-Ash1	ARGUS VI (Obama)	2012-12-01	9.75	3	2147.55	0.629683	84.9476	0.310366	0.9872	0.154259	0.136757	0.0888882	0.0045468	0.0022745	1.05765	0.0003232	2.333	0.11	0.0211	0.014	0.0028	0.036	0.0153	0.017	0.007981	0.00049	25.2569	0.0929496	99.9374	0.0521204	395.119	1.30787	1.46138	8.49476e-18	NM-254E	0.0095388	1.75e-05	1.57011	1.00016	0.000698	7.8e-06	4e-05	2e-06	0.000273	2e-07	0.0123	0	0.008068
61410-23	CM-Ash1	ARGUS VI (Obama)	2012-12-01	9.95	3	924.113	0.414849	50.7981	0.120833	0.4992	0.115741	0.0967335	0.0682515	0.0118341	0.0023779	1.05765	0.0003232	2.333	0.11	0.0211	0.014	0.0028	0.036	0.0153	0.017	0.007981	0.00049	18.1145	0.0460398	99.6189	0.0995214	291.756	0.685449	0.845369	5.07981e-18	NM-254E	0.0095388	1.75e-05	1.57035	1.00016	0.000698	7.8e-06	4e-05	2e-06	0.000273	2e-07	0.0123	0	0.008068
61410-24	CM-Ash1	ARGUS VI (Obama)	2012-12-01	10.0833	3	82.0347	0.115135	19.4791	0.0205216	0.2325	0.052345	0.0474297	0.0345871	0.0022539	0.0005781	1.05765	0.0003232	2.333	0.11	0.0211	0.014	0.0028	0.036	0.0153	0.017	0.007981	0.00049	4.16908	0.0115129	99.1843	0.288985	71.3851	0.193336	0.232113	1.94791e-18	NM-254E	0.0095388	1.75e-05	1.57052	1.00016	0.000698	7.8e-06	4e-05	2e-06	0.000273	2e-07	0.0123	0	0.008068
61410-25	CM-Ash1	ARGUS VI (Obama)	2012-12-01	10.3	3	64.547	0.170294	5.45078	0.0753249	-0.0038	0.125284	-0.0065974	0.0639612	0.0028758	0.0020684	1.05765	0.0003232	2.333	0.11	0.0211	0.014	0.0028	0.036	0.0153	0.017	0.007981	0.00049	11.6762	0.199592	98.6693	1.02509	193.3	3.13578	3.15378	5.45078e-19	NM-254E	0.0095388	1.75e-05	1.57081	1.00016	0.000698	7.8e-06	4e-05	2e-06	0.000273	2e-07	0.0123	0	0.008068
61410-26	CM-Ash1	ARGUS VI (Obama)	2012-12-01	10.4333	3	263.316	0.254951	45.6153	0.150676	0.5962	0.134892	0.0868754	0.0829652	0.0075188	0.0015597	1.05765	0.0003232	2.333	0.11	0.0211	0.014	0.0028	0.036	0.0153	0.017	0.007981	0.00049	5.71552	0.0221936	99.1507	0.223378	97.1718	0.367481	0.406432	4.56153e-18	NM-254E	0.0095388	1.75e-05	1.57098	1.00016	0.000698	7.8e-06	4e-05	2e-06	0.000273	2e-07	0.0123	0	0.008068
61410-27	CM-Ash1	ARGUS VI (Obama)	2012-12-01	10.5667	3	317.216	0.310161	19.0278	0.0812289	0.4372	0.125284	0.207864	0.0814883	0.018254	0.0023779	1.05765	0.0003232	2.333	0.11	0.0211	0.014	0.0028	0.036	0.0153	0.017	0.007981	0.00049	16.3784	0.0809098	98.2904	0.262238	265.724	1.22185	1.30339	1.90278e-18	NM-254E	0.0095388	1.75e-05	1.57116	1.00016	0.000698	7.8e-06	4e-05	2e-06	0.000273	2e-07	0.0123	0	0.008068
61410-28	CM-Ash1	ARGUS VI (Obama)	2012-12-01	10.7	3	7279.76	1.40431	129.251	0.320358	1.7892	0.125284	0.282053	0.0995036	0.0434472	0.003839	1.05765	0.0003232	2.333	0.11	0.0211	0.014	0.0028	0.036	0.0153	0.017	0.007981	0.00049	56.2147	0.140056	99.8225	0.031468	785.879	1.59188	1.9769	1.29251e-17	NM-254E	0.0095388	1.75e-05	1.57133	1.00016	0.000698	7.8e-06	4e-05	2e-06	0.000273	2e-07	0.0123	0	0.008068
61410-29	CM-Ash1	ARGUS VI (Obama)	2012-12-01	11.05	3	5570.42	1.20503	78.1696	0.150676	0.9512	0.144555	0.290779	0.0756089	0.0773873	0.0036293	1.05765	0.0003232	2.333	0.11	0.0211	0.014	0.0028	0.036	0.0153	0.017	0.007981	0.00049	70.9581	0.138351	99.5864	0.0361855	946.22	1.44063	1.9781	7.81696e-18	NM-254E	0.0095388	1.75e-05	1.57178	1.00016	0.000698	7.8e-06	4e-05	2e-06	0.000273	2e-07	0.0123	0	0.008068
61410-30	CM-Ash1	ARGUS VI (Obama)	2012-12-01	11.3833	3	593.556	0.357351	19.6181	0.120833	0.2992	0.125284	0.0646179	0.0845201	0.005668	0.0020684	1.05765	0.0003232	2.333	0.11	0.0211	0.014	0.0028	0.036	0.0153	0.017	0.007981	0.00049	30.1618	0.189342	99.7164	0.134254	462.865	2.5674	2.67479	1.96181e-18	NM-254E	0.0095388	1.75e-05	1.57221	1.00016	0.000698	7.8e-06	4e-05	2e-06	0.000273	2e-07	0.0123	0	0.008068
61410-31	CM-Ash1	ARGUS VI (Obama)	2012-12-01	11.5167	3	1181.04	0.560892	41.2806	0.240447	0.4312	0.154259	0.161484	0.0785876	0.0230769	0.0018636	1.05765	0.0003232	2.333	0.11	0.0211	0.014	0.0028	0.036	0.0153	0.017	0.007981	0.00049	28.4358	0.166778	99.4186	0.0818542	439.31	2.29072	2.40017	4.12806e-18	NM-254E	0.0095388	1.75e-05	1.57238	1.00016	0.000698	7.8e-06	4e-05	2e-06	0.000273	2e-07	0.0123	0	0.008068
61410-32	CM-Ash1	ARGUS VI (Obama)	2012-12-01	11.65	3	6167.49	1.60378	107.178	0.300375	1.2652	0.134892	0.0489064	0.083048	0.0328813	0.0028974	1.05765	0.0003232	2.333	0.11	0.0211	0.014	0.0028	0.036	0.0153	0.017	0.007981	0.00049	57.4447	0.161911	99.8412	0.0393283	799.806	1.82633	2.17915	1.07178e-17	NM-254E	0.0095388	1.75e-05	1.57255	1.00016	0.000698	7.8e-06	4e-05	2e-06	0.000273	2e-07	0.0123	0	0.008068
61410-33	CM-Ash1	ARGUS VI (Obama)	2012-12-01	11.7833	3	1418.87	0.531507	130.336	0.240447	1.7732	0.134892	0.64922	0.086041	0.0380215	0.0030017	1.05765	0.0003232	2.333	0.11	0.0211	0.014	0.0028	0.036	0.0153	0.017	0.007981	0.00049	10.7917	0.0214641	99.2047	0.0822797	179.351	0.3398	0.462282	1.30336e-17	NM-254E	0.0095388	1.75e-05	1.57272	1.00016	0.000698	7.8e-06	4e-05	2e-06	0.000273	2e-07	0.0123	0	0.008068
61410-34	CM-Ash1	ARGUS VI (Obama)	2012-12-01	12.1333	3	3278.56	1.10549	37.9911	0.120833	0.3422	0.134892	-0.0453075	0.0801085	0.0026431	0.0018636	1.05765	0.0003232	2.333	0.11	0.0211	0.014	0.0028	0.036	0.0153	0.017	0.007981	0.00049	86.2691	0.276337	99.9758	0.0506045	1099.09	2.6469	3.0503	3.79911e-18	NM-254E	0.0095388	1.75e-05	1.57317	1.00016	0.000698	7.8e-06	4e-05	2e-06	0.000273	2e-07	0.0123	0	0.008068
61410-35	CM-Ash1	ARGUS VI (Obama)	2012-12-01	12.2667	3	55.556	0.186011	7.47372	0.0674795	0.1022	0.125284	-0.0539659	0.092078	0.0063025	0.0015597	1.05765	0.0003232	2.333	0.11	0.0211	0.014	0.0028	0.036	0.0153	0.017	0.007981	0.00049	7.17354	0.0932352	96.608	0.958562	121.156	1.52369	1.5388	7.47372e-19	NM-254E	0.0095388	1.75e-05	1.57335	1.00016	0.000698	7.8e-06	4e-05	2e-06	0.000273	2e-07	0.0123	0	0.008068
61410-36	CM-Ash1	ARGUS VI (Obama)	2012-12-01	12.4	3	2381.94	0.659242	47.7087	0.140721	0.6622	0.134892	0.0579056	0.0890814	0.024124	0.0021713	1.05765	0.0003232	2.333	0.11	0.0211	0.014	0.0028	0.036	0.0153	0.017	0.007981	0.00049	49.7683	0.148092	99.6984	0.0476047	711.101	1.7534	2.05988	4.77087e-18	NM-254E	0.0095388	1.75e-05	1.57352	1.00016	0.000698	7.8e-06	4e-05	2e-06	0.000273	2e-07	0.0123	0	0.008068
61410-37	CM-Ash1	ARGUS VI (Obama)	2012-12-01	12.7333	3	263.192	0.237065	35.7277	0.180573	0.7332	0.134892	-0.100104	0.0801485	0.006589	0.0017692	1.05765	0.0003232	2.333	0.11	0.0211	0.014	0.0028	0.036	0.0153	0.017	0.007981	0.00049	7.30344	0.0403415	99.2514	0.237415	123.277	0.658516	0.693889	3.57277e-18	NM-254E	0.0095388	1.75e-05	1.57396	1.00016	0.000698	7.8e-06	4e-05	2e-06	0.000273	2e-07	0.0123	0	0.008068
61410-38	CM-Ash1	ARGUS VI (Obama)	2012-12-01	12.8667	3	6824.78	1.30465	150.629	0.420302	1.9462	0.125284	0.549058	0.0906187	0.029979	0.0026458	1.05765	0.0003232	2.333	0.11	0.0211	0.014	0.0028	0.036	0.0153	0.017	0.007981	0.00049	45.2414	0.126665	99.8697	0.0293896	656.703	1.54495	1.84709	1.50629e-17	NM-254E	0.0095388	1.75e-05	1.57413	1.00016	0.000698	7.8e-06	4e-05	2e-06	0.000273	2e-07	0.0123	0	0.008068
61757-01	A1070606	ARGUS VI (Jan)	2013-06-20	6.43333	4	0.0508122	0.0136768	825.101	0.0835464	26.9	0.0151208	0.2373	0.0569386	0.0391	0.019105	1.0584	0.000955	1.0448	0.062	0.0136	0.0092	0.019	0.049	0.0205	0.014	0.004336	0.00019	30.6206	0.0178422	99.8798	0.0183359	452.647	0.233671	0.23375	4.12551e-17	NM-258G	0.0091618	1.3928e-07	2.06905	1.00026	0.000653	3.6e-07	0.00014	0	0.0002633	3.4e-07	0.01077	0	0.007529
61757-02	A1070606	ARGUS VI (Jan)	2013-06-20	6.65	4	0.0823222	0.0136768	2570.41	0.117661	37.8141	0.0151208	0.4556	0.0569386	0.0683	0.019105	1.0584	0.000955	1.0448	0.062	0.0136	0.0092	0.019	0.049	0.0205	0.014	0.004336	0.00019	67.9036	0.0274807	99.9321	0.007711	885.471	0.284115	0.284316	1.2852e-16	NM-258G	0.0091618	1.3928e-07	2.06943	1.00026	0.000653	3.6e-07	0.00014	0	0.0002633	3.4e-07	0.01077	0	0.007529
61757-03	A1070606	ARGUS VI (Jan)	2013-06-20	6.86667	4	0.0867222	0.013973	3420.79	0.13507	51.2031	0.0167523	0.7178	0.0554707	0.0463	0.019105	1.0584	0.000955	1.0448	0.062	0.0136	0.0092	0.019	0.049	0.0205	0.014	0.004336	0.00019	66.7537	0.0220921	99.9554	0.0063461	873.544	0.229897	0.23014	1.7104e-16	NM-258G	0.0091618	1.3928e-07	2.06981	1.00026	0.000653	3.6e-07	0.00014	0	0.0002633	3.4e-07	0.01077	0	0.007529
61757-04	A1070606	ARGUS VI (Jan)	2013-06-20	7.1	4	0.0131222	0.0137584	178.805	0.0702353	45.4779	0.0159261	0.6169	0.0574543	0.0951	0.019105	1.0584	0.000955	1.0448	0.062	0.0136	0.0092	0.019	0.049	0.0205	0.014	0.004336	0.00019	3.92373	0.0027896	100.015	0.073553	64.6482	0.0451592	0.0451695	8.94024e-18	NM-258G	0.0091618	1.3928e-07	2.07019	1.00026	0.000653	3.6e-07	0.00014	0	0.0002633	3.4e-07	0.01077	0	0.007529
61757-05	A1070606	ARGUS VI (Jan)	2013-06-20	7.31667	4	0.0051922	0.0136768	79.1282	0.0668506	19.0008	0.0151208	0.2243	0.0554707	0.0378	0.019105	1.0584	0.000955	1.0448	0.062	0.0136	0.0092	0.019	0.049	0.0205	0.014	0.004336	0.00019	4.14966	0.0064853	99.8507	0.158708	68.302	0.104779	0.104784	3.95641e-18	NM-258G	0.0091618	1.3928e-07	2.07057	1.00026	0.000653	3.6e-07	0.00014	0	0.0002633	3.4e-07	0.01077	0	0.007529
61757-06	A1070606	ARGUS VI (Jan)	2013-06-20	7.55	4	0.0272922	0.0138425	263.895	0.0716938	16.4869	0.0143402	0.1258	0.0559464	0.022	0.019105	1.0584	0.000955	1.0448	0.062	0.0136	0.0092	0.019	0.049	0.0205	0.014	0.004336	0.00019	15.9446	0.0153722	99.687	0.0494709	249.585	0.224942	0.224969	1.31947e-17	NM-258G	0.0091618	1.3928e-07	2.07095	1.00026	0.000653	3.6e-07	0.00014	0	0.0002633	3.4e-07	0.01077	0	0.007529
61757-07	A1070606	ARGUS VI (Jan)	2013-06-20	7.98333	4	0.0196342	0.015112	581.286	0.077801	49.2815	0.0167523	0.753	0.0559464	0.0115	0.019105	1.0584	0.000955	1.0448	0.062	0.0136	0.0092	0.019	0.049	0.0205	0.014	0.004336	0.00019	11.7695	0.004621	99.8719	0.0237982	187.448	0.0699531	0.0700056	2.90643e-17	NM-258G	0.0091618	1.3928e-07	2.07171	1.00026	0.000653	3.6e-07	0.00014	0	0.0002633	3.4e-07	0.01077	0	0.007529
61757-08	A1070606	ARGUS VI (Jan)	2013-06-20	8.28333	4	-0.0064858	0.0152595	138.138	0.0684471	35.2247	0.0151208	0.381	0.0569386	0.0747	0.019105	1.0584	0.000955	1.0448	0.062	0.0136	0.0092	0.019	0.049	0.0205	0.014	0.004336	0.00019	3.91079	0.0034358	99.9412	0.0914309	64.4387	0.0556277	0.055636	6.90691e-18	NM-258G	0.0091618	1.3928e-07	2.07221	1.00026	0.000653	3.6e-07	0.00014	0	0.0002633	3.4e-07	0.01077	0	0.007529
61757-09	A1070606	ARGUS VI (Jan)	2013-06-20	8.51667	4	0.0203942	0.0152595	711.132	0.0822192	11.3667	0.0143402	0.2509	0.0545619	-0.01	0.0184391	1.0584	0.000955	1.0448	0.062	0.0136	0.0092	0.019	0.049	0.0205	0.014	0.004336	0.00019	62.3354	0.0794642	99.6747	0.0214777	826.978	0.848234	0.848295	3.55566e-17	NM-258G	0.0091618	1.3928e-07	2.07259	1.00026	0.000653	3.6e-07	0.00014	0	0.0002633	3.4e-07	0.01077	0	0.007529
61757-10	A1070606	ARGUS VI (Jan)	2013-06-20	8.73333	4	-0.0061658	0.0151481	265.725	0.0732462	22.391	0.0151208	0.3118	0.0564358	0.0039	0.019105	1.0584	0.000955	1.0448	0.062	0.0136	0.0092	0.019	0.049	0.0205	0.014	0.004336	0.00019	11.7388	0.0097117	99.0043	0.0546099	186.983	0.147055	0.14708	1.32863e-17	NM-258G	0.0091618	1.3928e-07	2.07296	1.00026	0.000653	3.6e-07	0.00014	0	0.0002633	3.4e-07	0.01077	0	0.007529
61757-11	A1070606	ARGUS VI (Jan)	2013-06-20	8.93333	4	0.0521242	0.0151481	1202.46	0.0920217	62.0369	0.0159261	0.9394	0.0550091	0.0171	0.019799	1.0584	0.000955	1.0448	0.062	0.0136	0.0092	0.019	0.049	0.0205	0.014	0.004336	0.00019	19.3342	0.0054048	99.8131	0.0134639	298.525	0.0770017	0.0771154	6.01231e-17	NM-258G	0.0091618	1.3928e-07	2.07332	1.00026	0.000653	3.6e-07	0.00014	0	0.0002633	3.4e-07	0.01077	0	0.007529
61757-12	A1070606	ARGUS VI (Jan)	2013-06-20	9.11667	4	0.0519842	0.0172978	659.203	0.13507	20.3007	0.0323364	0.1462	0.0700071	-0.0012	0.0322025	1.0584	0.000955	1.0448	0.062	0.0136	0.0092	0.019	0.049	0.0205	0.014	0.004336	0.00019	32.4188	0.0527891	99.8856	0.0393366	476.048	0.682572	0.682601	3.29602e-17	NM-258G	0.0091618	1.3928e-07	2.07363	1.00026	0.000653	3.6e-07	0.00014	0	0.0002633	3.4e-07	0.01077	0	0.007529
61757-13	A1070606	ARGUS VI (Jan)	2013-06-20	9.28333	4	0.0062942	0.0162734	135.976	0.077201	29.9358	0.0220145	0.2757	0.0645368	0.0759	0.0244131	1.0584	0.000955	1.0448	0.062	0.0136	0.0092	0.019	0.049	0.0205	0.014	0.004336	0.00019	4.53657	0.0054793	100.067	0.111529	74.5425	0.0882238	0.0882308	6.79881e-18	NM-258G	0.0091618	1.3928e-07	2.07391	1.00026	0.000653	3.6e-07	0.00014	0	0.0002633	3.4e-07	0.01077	0	0.007529
61757-14	A1070606	ARGUS VI (Jan)	2013-06-20	9.43333	4	0.0211242	0.017183	380.161	0.0996393	33.0243	0.0304243	0.2433	0.067897	0.0202	0.0260768	1.0584	0.000955	1.0448	0.062	0.0136	0.0092	0.019	0.049	0.0205	0.014	0.004336	0.00019	11.4714	0.0117299	99.7422	0.0513337	182.929	0.178009	0.178029	1.9008e-17	NM-258G	0.0091618	1.3928e-07	2.07417	1.00026	0.000653	3.6e-07	0.00014	0	0.0002633	3.4e-07	0.01077	0	0.007529
61757-15	A1070606	ARGUS VI (Jan)	2013-06-20	9.58333	4	0.0009742	0.016958	134.65	0.0802808	25.8722	0.0294727	0.3442	0.067897	0.0655	0.0277849	1.0584	0.000955	1.0448	0.062	0.0136	0.0092	0.019	0.049	0.0205	0.014	0.004336	0.00019	5.18621	0.0081485	99.8202	0.123291	84.9727	0.130457	0.130463	6.73249e-18	NM-258G	0.0091618	1.3928e-07	2.07443	1.00026	0.000653	3.6e-07	0.00014	0	0.0002633	3.4e-07	0.01077	0	0.007529
61757-16	A1070606	ARGUS VI (Jan)	2013-06-20	10.1167	4	0.0327941	0.0168726	734.445	0.144028	38.5241	0.0285244	0.7042	0.0658559	0.0175	0.0260768	1.0584	0.000955	1.0448	0.062	0.0136	0.0092	0.019	0.049	0.0205	0.014	0.004336	0.00019	19.0433	0.0149116	99.9539	0.0320937	294.375	0.212927	0.212967	3.67223e-17	NM-258G	0.0091618	1.3928e-07	2.07535	1.00026	0.000653	3.6e-07	0.00014	0	0.0002633	3.4e-07	0.01077	0	0.007529
61757-17	A1070606	ARGUS VI (Jan)	2013-06-20	10.2667	4	0.0269241	0.0174838	411.425	0.12627	28.004	0.0410444	0.3699	0.0887525	0.034	0.0340147	1.0584	0.000955	1.0448	0.062	0.0136	0.0092	0.019	0.049	0.0205	0.014	0.004336	0.00019	14.6297	0.0230144	99.6556	0.0644899	230.243	0.340347	0.340363	2.05713e-17	NM-258G	0.0091618	1.3928e-07	2.07558	1.00026	0.000653	3.6e-07	0.00014	0	0.0002633	3.4e-07	0.01077	0	0.007529
61757-18	A1070606	ARGUS VI (Jan)	2013-06-20	10.4333	4	0.0709241	0.0151517	3837.86	0.162308	45.3165	0.0175966	0.7762	0.0569386	0.0698	0.019799	1.0584	0.000955	1.0448	0.062	0.0136	0.0092	0.019	0.049	0.0205	0.014	0.004336	0.00019	84.5972	0.0331549	99.9252	0.0067656	1050.4	0.313244	0.31348	1.91893e-16	NM-258G	0.0091618	1.3928e-07	2.07588	1.00026	0.000653	3.6e-07	0.00014	0	0.0002633	3.4e-07	0.01077	0	0.007529
61757-19	A1070606	ARGUS VI (Jan)	2013-06-20	10.5667	4	0.100034	0.0168726	2008.93	0.218961	23.8706	0.0285244	0.4304	0.0700071	0.0264	0.0295296	1.0584	0.000955	1.0448	0.062	0.0136	0.0092	0.019	0.049	0.0205	0.014	0.004336	0.00019	84.1199	0.101155	99.9884	0.017236	1045.89	0.958063	0.958139	1.00446e-16	NM-258G	0.0091618	1.3928e-07	2.07612	1.00026	0.000653	3.6e-07	0.00014	0	0.0002633	3.4e-07	0.01077	0	0.007529
61757-20	A1070606	ARGUS VI (Jan)	2013-06-20	11.15	4	0.02044	0.0086	403.723	0.108467	12.0072	0.0238462	0.0941	0.0626259	0.0215	0.0244131	1.0584	0.000955	1.0448	0.062	0.0136	0.0092	0.019	0.049	0.0205	0.014	0.004336	0.00019	33.5842	0.0680671	99.9317	0.0483355	491.055	0.872932	0.872957	2.01862e-17	NM-258G	0.0091618	1.3928e-07	2.07711	1.00026	0.000653	3.6e-07	0.00014	0	0.0002633	3.4e-07	0.01077	0	0.007529
61757-21	A1070606	ARGUS VI (Jan)	2013-06-20	11.3833	4	0.03829	0.0056	810.751	0.0822192	22.8299	0.0151208	0.1664	0.0554707	0.0175	0.0184391	1.0584	0.000955	1.0448	0.062	0.0136	0.0092	0.019	0.049	0.0205	0.014	0.004336	0.00019	35.4127	0.0241101	99.7657	0.0186606	514.356	0.305291	0.305367	4.05376e-17	NM-258G	0.0091618	1.3928e-07	2.07749	1.00026	0.000653	3.6e-07	0.00014	0	0.0002633	3.4e-07	0.01077	0	0.007529
61757-22	A1070606	ARGUS VI (Jan)	2013-06-20	11.6	4	0.02409	0.0059	97.3289	0.0672309	24.7572	0.0143402	0.2954	0.0569386	0.0792	0.0184391	1.0584	0.000955	1.0448	0.062	0.0136	0.0092	0.019	0.049	0.0205	0.014	0.004336	0.00019	3.91939	0.0048587	99.9131	0.129597	64.5778	0.0786582	0.0786641	4.86645e-18	NM-258G	0.0091618	1.3928e-07	2.07787	1.00026	0.000653	3.6e-07	0.00014	0	0.0002633	3.4e-07	0.01077	0	0.007529
61757-23	A1070606	ARGUS VI (Jan)	2013-06-20	11.8167	4	0.00644	0.0053	278.107	0.0722011	17.9135	0.0151208	0.2017	0.0564358	-0.0023	0.019105	1.0584	0.000955	1.0448	0.062	0.0136	0.0092	0.019	0.049	0.0205	0.014	0.004336	0.00019	15.4705	0.0145524	99.7235	0.0487798	242.634	0.213755	0.213783	1.39054e-17	NM-258G	0.0091618	1.3928e-07	2.07825	1.00026	0.000653	3.6e-07	0.00014	0	0.0002633	3.4e-07	0.01077	0	0.007529
61757-24	A1070606	ARGUS VI (Jan)	2013-06-20	12.05	4	0.01845	0.0055	713.456	0.0828794	17.9176	0.0151208	0.1709	0.0550091	0.0096	0.019105	1.0584	0.000955	1.0448	0.062	0.0136	0.0092	0.019	0.049	0.0205	0.014	0.004336	0.00019	39.7565	0.0342593	99.8889	0.020865	568.549	0.42115	0.421215	3.56728e-17	NM-258G	0.0091618	1.3928e-07	2.07863	1.00026	0.000653	3.6e-07	0.00014	0	0.0002633	3.4e-07	0.01077	0	0.007529
61757-25	A1070606	ARGUS VI (Jan)	2013-06-20	12.2667	4	0.00788	0.0053	395.969	0.0743303	28.0987	0.0159261	0.3276	0.0564358	0.0185	0.0184391	1.0584	0.000955	1.0448	0.062	0.0136	0.0092	0.019	0.049	0.0205	0.014	0.004336	0.00019	14.0492	0.0089479	99.7752	0.0345028	221.637	0.13295	0.132988	1.97984e-17	NM-258G	0.0091618	1.3928e-07	2.07902	1.00026	0.000653	3.6e-07	0.00014	0	0.0002633	3.4e-07	0.01077	0	0.007529
61757-26	A1070606	ARGUS VI (Jan)	2013-06-20	12.4833	4	-0.01611	0.006	422.057	0.075452	12.7031	0.0135882	0.0947	0.0554707	-0.0187	0.019105	1.0584	0.000955	1.0448	0.062	0.0136	0.0092	0.019	0.049	0.0205	0.014	0.004336	0.00019	33.1673	0.0365899	99.8757	0.0322519	485.7	0.470625	0.47067	2.11029e-17	NM-258G	0.0091618	1.3928e-07	2.0794	1.00026	0.000653	3.6e-07	0.00014	0	0.0002633	3.4e-07	0.01077	0	0.007529
61757-27	A1070606	ARGUS VI (Jan)	2013-06-20	12.7167	4	0.03433	0.0057	594.265	0.0784092	24.2626	0.0143402	0.2663	0.0559464	0.0256	0.019105	1.0584	0.000955	1.0448	0.062	0.0136	0.0092	0.019	0.049	0.0205	0.014	0.004336	0.00019	24.4386	0.0152334	99.8345	0.0237298	369.84	0.208737	0.2088	2.97133e-17	NM-258G	0.0091618	1.3928e-07	2.07978	1.00026	0.000653	3.6e-07	0.00014	0	0.0002633	3.4e-07	0.01077	0	0.007529
61757-28	A1070606	ARGUS VI (Jan)	2013-06-20	12.9167	4	0.01227	0.007	10.588	0.0672309	2.3674	0.0143402	0.0792	0.0564358	-0.01	0.0212603	1.0584	0.000955	1.0448	0.062	0.0136	0.0092	0.019	0.049	0.0205	0.014	0.004336	0.00019	4.24735	0.0544762	95.1533	1.2338	69.8796	0.87938	0.879381	5.294e-19	NM-258G	0.0091618	1.3928e-07	2.08012	1.00026	0.000653	3.6e-07	0.00014	0	0.0002633	3.4e-07	0.01077	0	0.007529
61757-29	A1070606	ARGUS VI (Jan)	2013-06-20	13.1333	4	0.0521	0.0056	1819.7	0.1036	24.0093	0.0143402	0.2007	0.0559464	0.0482	0.0184391	1.0584	0.000955	1.0448	0.062	0.0136	0.0092	0.019	0.049	0.0205	0.014	0.004336	0.00019	75.7073	0.0455976	99.9248	0.0095773	964.424	0.45152	0.451663	9.0985e-17	NM-258G	0.0091618	1.3928e-07	2.0805	1.00026	0.000653	3.6e-07	0.00014	0	0.0002633	3.4e-07	0.01077	0	0.007529
61757-30	A1070606	ARGUS VI (Jan)	2013-06-20	13.35	4	-0.00727	0.0056	113.424	0.0672309	13.4681	0.0135882	0.1867	0.0559464	0.0604	0.019105	1.0584	0.000955	1.0448	0.062	0.0136	0.0092	0.019	0.049	0.0205	0.014	0.004336	0.00019	8.12837	0.0123437	96.6278	0.123702	131.481	0.192663	0.192673	5.67122e-18	NM-258G	0.0091618	1.3928e-07	2.08088	1.00026	0.000653	3.6e-07	0.00014	0	0.0002633	3.4e-07	0.01077	0	0.007529
61757-31	A1070606	ARGUS VI (Jan)	2013-06-20	13.5833	4	0.00852	0.0059	232.071	0.0707107	15.4858	0.0143402	0.0523	0.0550091	0.0015	0.019105	1.0584	0.000955	1.0448	0.062	0.0136	0.0092	0.019	0.049	0.0205	0.014	0.004336	0.00019	14.9575	0.015432	99.8863	0.0546352	235.084	0.227612	0.227637	1.16035e-17	NM-258G	0.0091618	1.3928e-07	2.08126	1.00026	0.000653	3.6e-07	0.00014	0	0.0002633	3.4e-07	0.01077	0	0.007529
61757-32	A1070606	ARGUS VI (Jan)	2013-06-20	13.8	4	0.00922	0.0057	420.977	0.0760263	29.4523	0.0151208	0.3859	0.0559464	0.039	0.019105	1.0584	0.000955	1.0448	0.062	0.0136	0.0092	0.019	0.049	0.0205	0.014	0.004336	0.00019	14.2741	0.0083162	99.9428	0.0329172	224.976	0.123339	0.123381	2.10488e-17	NM-258G	0.0091618	1.3928e-07	2.08164	1.00026	0.000653	3.6e-07	0.00014	0	0.0002633	3.4e-07	0.01077	0	0.007529
61757-33	A1070606	ARGUS VI (Jan)	2013-06-20	13.9333	4	0.01974	0.009	63.0874	0.0809197	14.1043	0.0229268	0.1604	0.068593	0.0826	0.0252389	1.0584	0.000955	1.0448	0.062	0.0136	0.0092	0.019	0.049	0.0205	0.014	0.004336	0.00019	4.44926	0.012998	99.6641	0.273599	73.136	0.209446	0.209449	3.15437e-18	NM-258G	0.0091618	1.3928e-07	2.08186	1.00026	0.000653	3.6e-07	0.00014	0	0.0002633	3.4e-07	0.01077	0	0.007529
61757-34	A1070606	ARGUS VI (Jan)	2013-06-20	14.3667	4	-0.001595	0.0138293	192.436	0.0702353	7.88084	0.0135882	0.0464	0.0550091	0.0263	0.019105	1.0584	0.000955	1.0448	0.062	0.0136	0.0092	0.019	0.049	0.0205	0.014	0.004336	0.00019	24.3352	0.0441568	99.7165	0.0669614	368.423	0.605531	0.605552	9.62181e-18	NM-258G	0.0091618	1.3928e-07	2.08262	1.00026	0.000653	3.6e-07	0.00014	0	0.0002633	3.4e-07	0.01077	0	0.007529
61757-35	A1070606	ARGUS VI (Jan)	2013-06-20	14.6	4	-0.022415	0.0139028	230.798	0.0702353	15.4573	0.0135882	0.0353	0.0550091	0.0225	0.0184391	1.0584	0.000955	1.0448	0.062	0.0136	0.0092	0.019	0.049	0.0205	0.014	0.004336	0.00019	14.911	0.0147184	99.9408	0.0541577	234.398	0.217169	0.217195	1.15399e-17	NM-258G	0.0091618	1.3928e-07	2.083	1.00026	0.000653	3.6e-07	0.00014	0	0.0002633	3.4e-07	0.01077	0	0.007529
61757-36	A1070606	ARGUS VI (Jan)	2013-06-20	14.7833	4	0.001485	0.0146714	117.8	0.0702353	14.8591	0.0151208	0.1416	0.0569386	0.033	0.0220227	1.0584	0.000955	1.0448	0.062	0.0136	0.0092	0.019	0.049	0.0205	0.014	0.004336	0.00019	7.86972	0.011258	99.3877	0.116153	127.439	0.176107	0.176117	5.88999e-18	NM-258G	0.0091618	1.3928e-07	2.08333	1.00026	0.000653	3.6e-07	0.00014	0	0.0002633	3.4e-07	0.01077	0	0.007529
61757-37	A1070606	ARGUS VI (Jan)	2013-06-20	14.9333	4	0.009495	0.0158395	125.125	0.0883912	13.9268	0.0257029	0.0216	0.065192	0.056	0.0286531	1.0584	0.000955	1.0448	0.062	0.0136	0.0092	0.019	0.049	0.0205	0.014	0.004336	0.00019	8.83735	0.0206291	98.4704	0.15685	142.513	0.320049	0.320056	6.25624e-18	NM-258G	0.0091618	1.3928e-07	2.08359	1.00026	0.000653	3.6e-07	0.00014	0	0.0002633	3.4e-07	0.01077	0	0.007529
61757-38	A1070606	ARGUS VI (Jan)	2013-06-20	15.1167	4	-0.004085	0.0144395	749.759	0.0848999	60.9522	0.0202148	0.8826	0.0559464	0.0205	0.0205183	1.0584	0.000955	1.0448	0.062	0.0136	0.0092	0.019	0.049	0.0205	0.014	0.004336	0.00019	12.2712	0.0045784	99.8468	0.0205306	195.027	0.0690227	0.06908	3.7488e-17	NM-258G	0.0091618	1.3928e-07	2.08391	1.00026	0.000653	3.6e-07	0.00014	0	0.0002633	3.4e-07	0.01077	0	0.007529
61757-39	A1070606	ARGUS VI (Jan)	2013-06-20	15.25	4	0.058745	0.0176139	2090.34	0.296554	40.9117	0.046911	0.5295	0.0838153	0.091	0.0304138	1.0584	0.000955	1.0448	0.062	0.0136	0.0092	0.019	0.049	0.0205	0.014	0.004336	0.00019	51.0576	0.059178	99.9694	0.0219801	702.453	0.676159	0.676217	1.04517e-16	NM-258G	0.0091618	1.3928e-07	2.08414	1.00026	0.000653	3.6e-07	0.00014	0	0.0002633	3.4e-07	0.01077	0	0.007529
61757-40	A1070606	ARGUS VI (Jan)	2013-06-20	15.4833	4	0.011405	0.0139406	223.631	0.0707107	35.1415	0.0159261	0.4222	0.0569386	0.001	0.019105	1.0584	0.000955	1.0448	0.062	0.0136	0.0092	0.019	0.049	0.0205	0.014	0.004336	0.00019	6.29523	0.0043244	99.0667	0.0600621	102.642	0.0685686	0.0685854	1.11816e-17	NM-258G	0.0091618	1.3928e-07	2.08452	1.00026	0.000653	3.6e-07	0.00014	0	0.0002633	3.4e-07	0.01077	0	0.007529
61757-41	A1070606	ARGUS VI (Jan)	2013-06-20	15.7	4	-0.013995	0.0139789	306.246	0.0722011	32.1341	0.0151208	0.3513	0.0569386	0.0062	0.019105	1.0584	0.000955	1.0448	0.062	0.0136	0.0092	0.019	0.049	0.0205	0.014	0.004336	0.00019	9.35999	0.0059227	98.3171	0.0476492	150.604	0.0914826	0.091509	1.53123e-17	NM-258G	0.0091618	1.3928e-07	2.0849	1.00026	0.000653	3.6e-07	0.00014	0	0.0002633	3.4e-07	0.01077	0	0.007529
61757-42	A1070606	ARGUS VI (Jan)	2013-06-20	15.9333	4	0.013125	0.0141795	463.179	0.0760263	13.5775	0.0143402	0.0744	0.0559464	0.0401	0.019105	1.0584	0.000955	1.0448	0.062	0.0136	0.0092	0.019	0.049	0.0205	0.014	0.004336	0.00019	33.9446	0.0370222	99.5519	0.0315617	495.67	0.473599	0.473645	2.3159e-17	NM-258G	0.0091618	1.3928e-07	2.08529	1.00026	0.000653	3.6e-07	0.00014	0	0.0002633	3.4e-07	0.01077	0	0.007529
61757-43	A1070606	ARGUS VI (Jan)	2013-06-20	16.5	4	-0.0107644	0.0138835	303.207	0.0727186	17.833	0.0135882	0.1895	0.0550091	0.0176	0.019105	1.0584	0.000955	1.0448	0.062	0.0136	0.0092	0.019	0.049	0.0205	0.014	0.004336	0.00019	16.9493	0.0144439	99.757	0.0449254	264.228	0.209674	0.209707	1.51604e-17	NM-258G	0.0091618	1.3928e-07	2.08627	1.00026	0.000653	3.6e-07	0.00014	0	0.0002633	3.4e-07	0.01077	0	0.007529
61757-44	A1070606	ARGUS VI (Jan)	2013-06-20	16.7167	4	0.0223756	0.0140093	508.871	0.077201	39.0837	0.0159261	0.4833	0.0564358	-0.0108	0.019105	1.0584	0.000955	1.0448	0.062	0.0136	0.0092	0.019	0.049	0.0205	0.014	0.004336	0.00019	12.9704	0.0061415	99.7029	0.0284323	205.538	0.0920566	0.0921041	2.54435e-17	NM-258G	0.0091618	1.3928e-07	2.08665	1.00026	0.000653	3.6e-07	0.00014	0	0.0002633	3.4e-07	0.01077	0	0.007529
61757-45	A1070606	ARGUS VI (Jan)	2013-06-20	16.95	4	0.0154656	0.0136858	249.369	0.0707107	17.821	0.0143402	0.1872	0.0559464	0.0394	0.019105	1.0584	0.000955	1.0448	0.062	0.0136	0.0092	0.019	0.049	0.0205	0.014	0.004336	0.00019	13.972	0.0128368	99.9298	0.0525581	220.49	0.190851	0.190877	1.24685e-17	NM-258G	0.0091618	1.3928e-07	2.08704	1.00026	0.000653	3.6e-07	0.00014	0	0.0002633	3.4e-07	0.01077	0	0.007529
61757-46	A1070606	ARGUS VI (Jan)	2013-06-20	17.1667	4	0.0090356	0.0139248	247.52	0.0693181	13.3791	0.0143402	0.1085	0.0559464	0.0521	0.0184391	1.0584	0.000955	1.0448	0.062	0.0136	0.0092	0.019	0.049	0.0205	0.014	0.004336	0.00019	18.4225	0.021279	99.6446	0.0510967	285.49	0.305327	0.305353	1.2376e-17	NM-258G	0.0091618	1.3928e-07	2.08742	1.00026	0.000653	3.6e-07	0.00014	0	0.0002633	3.4e-07	0.01077	0	0.007529
61757-47	A1070606	ARGUS VI (Jan)	2013-06-20	17.4	4	0.0223656	0.0137241	313.922	0.0737835	31.4259	0.0151208	0.3792	0.0569386	0.0246	0.0184391	1.0584	0.000955	1.0448	0.062	0.0136	0.0092	0.019	0.049	0.0205	0.014	0.004336	0.00019	9.86805	0.0062585	98.8871	0.0470338	158.435	0.0962559	0.0962835	1.56961e-17	NM-258G	0.0091618	1.3928e-07	2.0878	1.00026	0.000653	3.6e-07	0.00014	0	0.0002633	3.4e-07	0.01077	0	0.007529
61757-48	A1070606	ARGUS VI (Jan)	2013-06-20	17.6167	4	0.0022356	0.0139248	538.248	0.0784092	14.0424	0.0143402	0.1343	0.0554707	-0.0085	0.019105	1.0584	0.000955	1.0448	0.062	0.0136	0.0092	0.019	0.049	0.0205	0.014	0.004336	0.00019	38.2705	0.0399681	99.8903	0.0261719	550.189	0.496281	0.496333	2.69124e-17	NM-258G	0.0091618	1.3928e-07	2.08819	1.00026	0.000653	3.6e-07	0.00014	0	0.0002633	3.4e-07	0.01077	0	0.007529
61757-49	A1070606	ARGUS VI (Jan)	2013-06-20	17.8333	4	-0.0191044	0.0138026	270.981	0.0716938	6.97879	0.0134417	0.0631	0.0541295	0.0163	0.019105	1.0584	0.000955	1.0448	0.062	0.0136	0.0092	0.019	0.049	0.0205	0.014	0.004336	0.00019	38.773	0.0763635	99.9008	0.048696	556.418	0.944978	0.945006	1.3549e-17	NM-258G	0.0091618	1.3928e-07	2.08857	1.00026	0.000653	3.6e-07	0.00014	0	0.0002633	3.4e-07	0.01077	0	0.007529
61757-50	A1070606	ARGUS VI (Jan)	2013-06-20	18.2833	4	0.0146696	0.0138715	229.239	0.0707107	6.3211	0.0143402	0.0515	0.0541295	0.0224	0.019105	1.0584	0.000955	1.0448	0.062	0.0136	0.0092	0.019	0.049	0.0205	0.014	0.004336	0.00019	36.1623	0.0838862	99.7614	0.0570748	523.822	1.05672	1.05674	1.14619e-17	NM-258G	0.0091618	1.3928e-07	2.08934	1.00026	0.000653	3.6e-07	0.00014	0	0.0002633	3.4e-07	0.01077	0	0.007529
61757-51	A1070606	ARGUS VI (Jan)	2013-06-20	18.5	4	0.0071396	0.0137032	201.169	0.0702353	31.8244	0.0151208	0.4734	0.0564358	0.0124	0.019105	1.0584	0.000955	1.0448	0.062	0.0136	0.0092	0.019	0.049	0.0205	0.014	0.004336	0.00019	6.04929	0.0055081	95.8374	0.0816762	98.7387	0.087523	0.0875352	1.00585e-17	NM-258G	0.0091618	1.3928e-07	2.08972	1.00026	0.000653	3.6e-07	0.00014	0	0.0002633	3.4e-07	0.01077	0	0.007529
61757-52	A1070606	ARGUS VI (Jan)	2013-06-20	18.7333	4	0.0211296	0.0136227	228.905	0.0711969	4.47897	0.0135882	0.0671	0.0541295	0.043	0.0184391	1.0584	0.000955	1.0448	0.062	0.0136	0.0092	0.019	0.049	0.0205	0.014	0.004336	0.00019	51.025	0.156907	99.8798	0.0587495	702.08	1.79316	1.79318	1.14453e-17	NM-258G	0.0091618	1.3928e-07	2.0901	1.00026	0.000653	3.6e-07	0.00014	0	0.0002633	3.4e-07	0.01077	0	0.007529
61757-53	A1070606	ARGUS VI (Jan)	2013-06-20	18.95	4	-0.0048504	0.0138715	118.39	0.0688767	27.6191	0.0151208	0.3188	0.0574543	0.0394	0.0184391	1.0584	0.000955	1.0448	0.062	0.0136	0.0092	0.019	0.049	0.0205	0.014	0.004336	0.00019	4.27271	0.0045395	99.8796	0.108065	70.2889	0.0732617	0.0732692	5.91948e-18	NM-258G	0.0091618	1.3928e-07	2.09049	1.00026	0.000653	3.6e-07	0.00014	0	0.0002633	3.4e-07	0.01077	0	0.007529
61757-54	A1070606	ARGUS VI (Jan)	2013-06-20	19.1833	4	0.0481896	0.0137444	426.038	0.0743303	34.2243	0.0159261	0.4274	0.0569386	0.0095	0.0184391	1.0584	0.000955	1.0448	0.062	0.0136	0.0092	0.019	0.049	0.0205	0.014	0.004336	0.00019	12.3976	0.0067275	99.6784	0.0328292	196.932	0.101316	0.101355	2.13019e-17	NM-258G	0.0091618	1.3928e-07	2.09087	1.00026	0.000653	3.6e-07	0.00014	0	0.0002633	3.4e-07	0.01077	0	0.007529
61757-55	A1070606	ARGUS VI (Jan)	2013-06-20	19.4	4	0.0039696	0.0137444	352.644	0.0748866	26.7478	0.0159261	0.3365	0.0564358	0.0086	0.019105	1.0584	0.000955	1.0448	0.062	0.0136	0.0092	0.019	0.049	0.0205	0.014	0.004336	0.00019	13.1532	0.0089344	99.8498	0.0389155	208.276	0.13372	0.133754	1.76322e-17	NM-258G	0.0091618	1.3928e-07	2.09125	1.00026	0.000653	3.6e-07	0.00014	0	0.0002633	3.4e-07	0.01077	0	0.007529
61757-56	A1070606	ARGUS VI (Jan)	2013-06-20	19.6167	4	-0.0045604	0.0137444	315.586	0.0743303	19.8167	0.0143402	0.2668	0.0564358	0.0034	0.019799	1.0584	0.000955	1.0448	0.062	0.0136	0.0092	0.019	0.049	0.0205	0.014	0.004336	0.00019	15.8553	0.0128895	99.6339	0.0437068	248.277	0.188747	0.188779	1.57793e-17	NM-258G	0.0091618	1.3928e-07	2.09164	1.00026	0.000653	3.6e-07	0.00014	0	0.0002633	3.4e-07	0.01077	0	0.007529
61757-57	A1070606	ARGUS VI (Jan)	2013-08-26	18.15	4.5	-0.0238	0.026	84.8859	0.0953716	1.45665	0.0501155	0.04433	0.0362327	-0.02912	0.0242685	1.0584	0.000955	1.59435	0.043252	0.01555	0.0034	-0.00023	0.0041	0.02212	0.0036	0.0062251	0.0001684	57.7148	1.99126	99.1352	0.277365	776.98	21.8441	21.8441	4.2443e-18	NM-258G	0.0091618	1.3928e-07	7.84588	1.00074	0.000653	3.6e-07	0.00014	0	0.0002633	3.4e-07	0.01077	0	0.007529
61757-58	A1070606	ARGUS VI (Jan)	2013-08-26	18.3167	4.5	0.0414	0.025	329.909	0.118201	28.7426	0.0690837	0.32003	0.0372265	-0.07112	0.0312083	1.0584	0.000955	1.58516	0.0432607	0.01555	0.0034	-0.00023	0.0041	0.02212	0.0036	0.0061902	0.0001683	11.4	0.0285098	99.4595	0.0768852	181.845	0.432911	0.432919	1.64954e-17	NM-258G	0.0091618	1.3928e-07	7.84692	1.00074	0.000653	3.6e-07	0.00014	0	0.0002633	3.4e-07	0.01077	0	0.007529
61757-59	A1070606	ARGUS VI (Jan)	2013-08-26	18.4167	4.5	0.0459	0.024	74.4854	0.0814425	15.0547	0.0710814	0.22913	0.0302789	0.04868	0.026248	1.0584	0.000955	1.57909	0.0432652	0.01555	0.0034	-0.00023	0.0041	0.02212	0.0036	0.0061671	0.0001683	4.47483	0.0296183	90.6465	0.431235	73.5481	0.477154	0.477156	3.72427e-18	NM-258G	0.0091618	1.3928e-07	7.84761	1.00074	0.000653	3.6e-07	0.00014	0	0.0002633	3.4e-07	0.01077	0	0.007529
61757-60	A1070606	ARGUS VI (Jan)	2013-08-26	18.5333	4.5	0.0672	0.027	311.654	0.10896	9.54215	0.0600963	0.11903	0.0243477	-0.03542	0.0341901	1.0584	0.000955	1.57317	0.0432686	0.01555	0.0034	-0.00023	0.0041	0.02212	0.0036	0.0061445	0.0001682	32.5877	0.206547	99.8747	0.0779642	478.23	2.6675	2.66751	1.55827e-17	NM-258G	0.0091618	1.3928e-07	7.84828	1.00074	0.000653	3.6e-07	0.00014	0	0.0002633	3.4e-07	0.01077	0	0.007529
61757-61	A1070606	ARGUS VI (Jan)	2013-08-26	18.6333	4.5	-0.001	0.026	118.928	0.0971667	9.73525	0.0590979	0.08263	0.0243477	-0.11212	0.0292226	1.0584	0.000955	1.56734	0.043271	0.01555	0.0034	-0.00023	0.0041	0.02212	0.0036	0.0061223	0.0001681	12.0435	0.0763045	98.7256	0.195197	191.591	1.1525	1.15251	5.94641e-18	NM-258G	0.0091618	1.3928e-07	7.84895	1.00074	0.000653	3.6e-07	0.00014	0	0.0002633	3.4e-07	0.01077	0	0.007529
61757-62	A1070606	ARGUS VI (Jan)	2013-08-26	18.7333	4.5	-0.0297	0.027	8.96936	0.0789208	1.14555	0.0541069	0.07933	0.0332537	0.03488	0.0282305	1.0584	0.000955	1.56154	0.0432723	0.01555	0.0034	-0.00023	0.0041	0.02212	0.0036	0.0061002	0.0001681	6.27279	0.361944	80.2387	2.74339	102.287	5.74014	5.74014	4.48468e-19	NM-258G	0.0091618	1.3928e-07	7.84962	1.00074	0.000653	3.6e-07	0.00014	0	0.0002633	3.4e-07	0.01077	0	0.007529
61757-63	A1070606	ARGUS VI (Jan)	2013-08-26	19.05	4.5	0.014148	0.0289188	419.771	0.137012	15.9376	0.0620932	0.17173	0.0332537	0.02998	0.0272389	1.0584	0.000955	1.54448	0.0432702	0.01555	0.0034	-0.00023	0.0041	0.02212	0.0036	0.006035	0.0001678	26.0263	0.103073	98.9159	0.0767226	391.468	1.39578	1.39579	2.09885e-17	NM-258G	0.0091618	1.3928e-07	7.85162	1.00074	0.000653	3.6e-07	0.00014	0	0.0002633	3.4e-07	0.01077	0	0.007529
61757-64	A1070606	ARGUS VI (Jan)	2013-08-26	19.3333	4.5	0.038548	0.0289188	152.243	0.0891928	37.0994	0.0670862	0.45353	0.0322616	0.05958	0.0312083	1.0584	0.000955	1.52826	0.0432593	0.01555	0.0034	-0.00023	0.0041	0.02212	0.0036	0.0059728	0.0001676	4.08955	0.0092889	99.9126	0.148969	67.3306	0.150155	0.150158	7.61214e-18	NM-258G	0.0091618	1.3928e-07	7.85355	1.00074	0.000653	3.6e-07	0.00014	0	0.0002633	3.4e-07	0.01077	0	0.007529
61757-65	A1070606	ARGUS VI (Jan)	2013-08-26	19.6167	4.5	-0.003082	0.0159495	132.133	0.0485156	33.5072	0.0183183	0.35493	0.0136312	0.03009	0.0106283	1.0584	0.000955	1.51311	0.0432408	0.01555	0.0034	-0.00023	0.0041	0.02212	0.0036	0.0059147	0.0001673	3.92747	0.0033205	99.8595	0.074291	64.7088	0.0537521	0.0537608	6.60666e-18	NM-258G	0.0091618	1.3928e-07	7.85538	1.00074	0.000653	3.6e-07	0.00014	0	0.0002633	3.4e-07	0.01077	0	0.007529
61757-66	A1070606	ARGUS VI (Jan)	2013-08-26	19.7333	4.5	-0.001752	0.0280232	338.019	0.12755	20.3814	0.075077	0.20863	0.0273095	0.04058	0.0272389	1.0584	0.000955	1.50761	0.0432321	0.01555	0.0034	-0.00023	0.0041	0.02212	0.0036	0.0058936	0.0001672	16.4939	0.0618418	99.5698	0.0782267	257.605	0.900975	0.900982	1.6901e-17	NM-258G	0.0091618	1.3928e-07	7.85605	1.00074	0.000653	3.6e-07	0.00014	0	0.0002633	3.4e-07	0.01077	0	0.007529
61757-67	A1070606	ARGUS VI (Jan)	2013-08-26	19.8667	4.5	0.0026	0.027	227.894	0.118186	16.1652	0.0531089	0.11923	0.0263213	-0.01222	0.0322019	1.0584	0.000955	1.50059	0.0432194	0.01555	0.0034	-0.00023	0.0041	0.02212	0.0036	0.0058665	0.0001671	14.0119	0.0479299	99.5167	0.107295	221.082	0.712365	0.712372	1.13947e-17	NM-258G	0.0091618	1.3928e-07	7.85692	1.00074	0.000653	3.6e-07	0.00014	0	0.0002633	3.4e-07	0.01077	0	0.007529
61757-68	A1070606	ARGUS VI (Jan)	2013-08-26	20.1667	4.5	0.0231	0.028	919.192	0.185108	10.4674	0.0541069	0.18703	0.0292884	0.00618	0.0312083	1.0584	0.000955	1.48507	0.0431849	0.01555	0.0034	-0.00023	0.0041	0.02212	0.0036	0.0058068	0.0001668	86.7182	0.450134	98.8329	0.0503298	1070.33	4.20677	4.20678	4.59596e-17	NM-258G	0.0091618	1.3928e-07	7.85885	1.00074	0.000653	3.6e-07	0.00014	0	0.0002633	3.4e-07	0.01077	0	0.007529
61757-69	A1070606	ARGUS VI (Jan)	2013-08-26	20.2667	4.5	0.0146	0.031	254.396	0.108003	33.2878	0.0730791	0.37883	0.03127	-0.00682	0.0272389	1.0584	0.000955	1.47968	0.0431709	0.01555	0.0034	-0.00023	0.0041	0.02212	0.0036	0.005786	0.0001667	7.59737	0.017806	99.5838	0.0914902	123.174	0.279185	0.279191	1.27198e-17	NM-258G	0.0091618	1.3928e-07	7.85953	1.00074	0.000653	3.6e-07	0.00014	0	0.0002633	3.4e-07	0.01077	0	0.007529
61757-70	A1070606	ARGUS VI (Jan)	2013-08-26	20.3667	4.5	0.0503	0.024	335.673	0.127524	8.59105	0.0501155	0.09303	0.0243477	-0.01992	0.0302152	1.0584	0.000955	1.47438	0.0431561	0.01555	0.0034	-0.00023	0.0041	0.02212	0.0036	0.0057655	0.0001666	38.9487	0.228816	99.7775	0.0781274	558.591	2.82818	2.82819	1.67836e-17	NM-258G	0.0091618	1.3928e-07	7.8602	1.00074	0.000653	3.6e-07	0.00014	0	0.0002633	3.4e-07	0.01077	0	0.007529
61757-71	A1070606	ARGUS VI (Jan)	2013-08-26	20.4667	4.5	0.0755	0.026	3462.16	0.342726	38.4798	0.0640902	0.51723	0.0392149	-0.00262	0.0351847	1.0584	0.000955	1.46911	0.0431404	0.01555	0.0034	-0.00023	0.0041	0.02212	0.0036	0.0057452	0.0001665	89.6853	0.149934	99.7615	0.0172818	1097.85	1.38032	1.38037	1.73108e-16	NM-258G	0.0091618	1.3928e-07	7.86087	1.00074	0.000653	3.6e-07	0.00014	0	0.0002633	3.4e-07	0.01077	0	0.007529
61757-72	A1070606	ARGUS VI (Jan)	2013-08-26	20.7833	4.5	-0.272319	0.0312824	700.075	0.1657	22.3721	0.0680849	0.27413	0.0292884	0.04228	0.0282305	1.0584	0.000955	1.45363	0.0430884	0.01555	0.0034	-0.00023	0.0041	0.02212	0.0036	0.0056853	0.0001662	31.2264	0.0957496	99.8859	0.0436857	460.564	1.24857	1.24859	3.50038e-17	NM-258G	0.0091618	1.3928e-07	7.86287	1.00074	0.000653	3.6e-07	0.00014	0	0.0002633	3.4e-07	0.01077	0	0.007529
61757-73	A1070606	ARGUS VI (Jan)	2013-08-26	20.8833	4.5	-0.219919	0.0286285	211.59	0.0970771	16.1066	0.0670862	0.14103	0.0233626	-0.01492	0.0292226	1.0584	0.000955	1.44848	0.0430693	0.01555	0.0034	-0.00023	0.0041	0.02212	0.0036	0.0056654	0.0001661	13.0708	0.0555785	99.6286	0.0955778	207.042	0.832404	0.832409	1.05795e-17	NM-258G	0.0091618	1.3928e-07	7.86354	1.00074	0.000653	3.6e-07	0.00014	0	0.0002633	3.4e-07	0.01077	0	0.007529
61757-74	A1070606	ARGUS VI (Jan)	2013-08-26	20.9833	4.5	-0.233919	0.0295057	86.3528	0.099766	5.22545	0.0541069	0.01193	0.0282986	0.02548	0.0282305	1.0584	0.000955	1.44337	0.0430494	0.01555	0.0034	-0.00023	0.0041	0.02212	0.0036	0.0056456	0.000166	16.4336	0.173568	99.5608	0.234521	256.727	2.52993	2.52994	4.31764e-18	NM-258G	0.0091618	1.3928e-07	7.86421	1.00074	0.000653	3.6e-07	0.00014	0	0.0002633	3.4e-07	0.01077	0	0.007529
61757-75	A1070606	ARGUS VI (Jan)	2013-08-26	21.1	4.5	-0.234019	0.0321806	73.3904	0.0952705	7.78055	0.0610947	0.09663	0.0243477	0.06108	0.0272389	1.0584	0.000955	1.43829	0.0430288	0.01555	0.0034	-0.00023	0.0041	0.02212	0.0036	0.0056259	0.0001659	9.39099	0.0773969	99.7086	0.279106	151.083	1.19516	1.19517	3.66952e-18	NM-258G	0.0091618	1.3928e-07	7.86489	1.00074	0.000653	3.6e-07	0.00014	0	0.0002633	3.4e-07	0.01077	0	0.007529
61757-76	A1070606	ARGUS VI (Jan)	2013-08-26	21.2	4.5	-0.242119	0.0303906	37.6298	0.0714047	8.20395	0.0580996	0.06583	0.0263213	0.02688	0.0302152	1.0584	0.000955	1.43323	0.0430074	0.01555	0.0034	-0.00023	0.0041	0.02212	0.0036	0.0056063	0.0001658	4.57926	0.0390819	100.072	0.511278	75.2297	0.629037	0.629038	1.88149e-18	NM-258G	0.0091618	1.3928e-07	7.86556	1.00074	0.000653	3.6e-07	0.00014	0	0.0002633	3.4e-07	0.01077	0	0.007529
61757-77	A1070606	ARGUS VI (Jan)	2013-08-26	21.5	4.5	-0.284819	0.0268996	285.265	0.10883	17.8863	0.0610947	0.19203	0.0273095	-0.02952	0.0252579	1.0584	0.000955	1.41887	0.0429422	0.01555	0.0034	-0.00023	0.0041	0.02212	0.0036	0.0055505	0.0001655	15.7648	0.0558006	98.9669	0.0986972	246.952	0.817705	0.817713	1.42632e-17	NM-258G	0.0091618	1.3928e-07	7.86749	1.00074	0.000653	3.6e-07	0.00014	0	0.0002633	3.4e-07	0.01077	0	0.007529
61757-78	A1070606	ARGUS VI (Jan)	2013-08-26	21.6	4.5	-0.315019	0.0277595	229.769	0.108821	7.38115	0.055105	0.09063	0.0263213	-0.02472	0.0282305	1.0584	0.000955	1.41394	0.0429184	0.01555	0.0034	-0.00023	0.0041	0.02212	0.0036	0.0055314	0.0001654	31.0372	0.23333	99.804	0.0985561	458.095	3.04673	3.04674	1.14884e-17	NM-258G	0.0091618	1.3928e-07	7.86817	1.00074	0.000653	3.6e-07	0.00014	0	0.0002633	3.4e-07	0.01077	0	0.007529
65992-01	A16-BTW-MH1	ARGUS VI (Jan)	2018-01-25	8.1	2.25	0.113177	0.0290085	3010.29	0.306317	19.207	0.103446	0.346375	0.0250612	-0.0587168	0.0423369	1.00246	0.0008806	0.538571	0.0608186	0.0232394	0.0030166	0.0054997	0.0009827	0.042942	0.0014606	0.0039686	0.0003372	156.495	0.84358	99.8818	0.0238214	476.376	2.26094	2.26354	1.50514e-16	NM-293D	0.0018994	4.9096e-07	2.00549	1.00025	0.000758	7e-06	4e-05	2e-05	0.000286	5e-07	0.013	0	0.00873
65992-02	A16-BTW-MH1	ARGUS VI (Jan)	2018-01-25	9.08333	2.25	0.0362037	0.0154417	435.617	0.120235	20.0253	0.0407045	0.315115	0.0160809	0.101212	0.0202101	1.00246	0.0008806	0.543825	0.057676	0.0232394	0.0030166	0.0054997	0.0009827	0.042942	0.0014606	0.0040149	0.0003091	21.6642	0.0460283	99.6542	0.0672321	73.8145	0.153708	0.154842	2.17808e-17	NM-293D	0.0018994	4.9096e-07	2.00713	1.00025	0.000758	7e-06	4e-05	2e-05	0.000286	5e-07	0.013	0	0.00873
65992-03	A16-BTW-MH1	ARGUS VI (Jan)	2018-01-25	9.18333	2.25	0.0243178	0.018115	685.702	0.123151	31.3102	0.049037	0.456574	0.0140212	0.219243	0.0256895	1.00246	0.0008806	0.544284	0.0574298	0.0232394	0.0030166	0.0054997	0.0009827	0.042942	0.0014606	0.0040192	0.0003068	21.8285	0.0356346	99.736	0.0491002	74.3633	0.118963	0.120445	3.42851e-17	NM-293D	0.0018994	4.9096e-07	2.00729	1.00025	0.000758	7e-06	4e-05	2e-05	0.000286	5e-07	0.013	0	0.00873
65992-04	A16-BTW-MH1	ARGUS VI (Jan)	2018-01-25	9.4	2.25	-0.019209	0.0067994	469.158	0.0647095	23.4424	0.0122628	0.296366	0.002619	0.0349698	0.0049176	1.00246	0.0008806	0.545308	0.0568985	0.0232394	0.0030166	0.0054997	0.0009827	0.042942	0.0014606	0.004029	0.0003016	19.9401	0.0118099	99.7032	0.0308926	68.0481	0.0395626	0.0431662	2.34579e-17	NM-293D	0.0018994	4.9096e-07	2.00765	1.00025	0.000758	7e-06	4e-05	2e-05	0.000286	5e-07	0.013	0	0.00873
65992-05	A16-BTW-MH1	ARGUS VI (Jan)	2018-01-25	9.5	2.25	0.0013497	0.0218091	432.936	0.114195	19.8328	0.0381479	0.330382	0.0142041	0.101291	0.0298103	1.00246	0.0008806	0.545741	0.0566821	0.0232394	0.0030166	0.0054997	0.0009827	0.042942	0.0014606	0.0040332	0.0002995	21.7488	0.0434177	99.6949	0.0591558	74.097	0.144968	0.146178	2.16468e-17	NM-293D	0.0018994	4.9096e-07	2.00781	1.00025	0.000758	7e-06	4e-05	2e-05	0.000286	5e-07	0.013	0	0.00873
65992-06	A16-BTW-MH1	ARGUS VI (Jan)	2018-01-25	9.6	2.25	0.0370307	0.0234853	867.783	0.195047	42.5089	0.0415439	0.594876	0.0145289	0.086283	0.0230081	1.00246	0.0008806	0.546167	0.0564739	0.0232394	0.0030166	0.0054997	0.0009827	0.042942	0.0014606	0.0040375	0.0002974	20.3664	0.0209905	99.8332	0.0395432	69.4755	0.0702626	0.0724386	4.33892e-17	NM-293D	0.0018994	4.9096e-07	2.00797	1.00025	0.000758	7e-06	4e-05	2e-05	0.000286	5e-07	0.013	0	0.00873
65992-07	A16-BTW-MH1	ARGUS VI (Jan)	2018-01-25	9.7	2.25	0.0525732	0.0268476	1092.59	0.12116	49.4935	0.0338401	0.695605	0.0152542	0.153149	0.0257603	1.00246	0.0008806	0.54658	0.0562768	0.0232394	0.0030166	0.0054997	0.0009827	0.042942	0.0014606	0.0040416	0.0002954	22.0174	0.0161818	99.8014	0.0290365	74.9938	0.0540032	0.0572457	5.46293e-17	NM-293D	0.0018994	4.9096e-07	2.00813	1.00025	0.000758	7e-06	4e-05	2e-05	0.000286	5e-07	0.013	0	0.00873
65992-08	A16-BTW-MH1	ARGUS VI (Jan)	2018-01-25	9.78333	2.25	-0.0208142	0.0201055	305.721	0.105618	14.0673	0.0459014	0.244144	0.0100423	0.0499186	0.0260448	1.00246	0.0008806	0.546986	0.0560875	0.0232394	0.0030166	0.0054997	0.0009827	0.042942	0.0014606	0.0040457	0.0002935	21.6598	0.0726229	99.7285	0.0837507	73.7998	0.242521	0.24324	1.5286e-17	NM-293D	0.0018994	4.9096e-07	2.00829	1.00025	0.000758	7e-06	4e-05	2e-05	0.000286	5e-07	0.013	0	0.00873
65992-09	A16-BTW-MH1	ARGUS VI (Jan)	2018-01-25	10.0167	2.25	0.0024161	0.0068926	558.32	0.0659977	27.9129	0.0127144	0.348271	0.0025041	0.04229	0.0047741	1.00246	0.0008806	0.547907	0.0556754	0.0232394	0.0030166	0.0054997	0.0009827	0.042942	0.0014606	0.0040552	0.0002891	19.9089	0.0102735	99.6013	0.0268501	67.9433	0.0344178	0.0384943	2.7916e-17	NM-293D	0.0018994	4.9096e-07	2.00866	1.00025	0.000758	7e-06	4e-05	2e-05	0.000286	5e-07	0.013	0	0.00873
65992-10	A16-BTW-MH1	ARGUS VI (Jan)	2018-01-25	10.2667	2.25	0.0843896	0.0154222	525.33	0.125738	23.9005	0.0404888	0.350003	0.0122085	0.0793521	0.0305246	1.00246	0.0008806	0.548876	0.0552696	0.0232394	0.0030166	0.0054997	0.0009827	0.042942	0.0014606	0.0040656	0.0002847	21.9353	0.038485	99.8618	0.0512475	74.7198	0.128454	0.129841	2.62665e-17	NM-293D	0.0018994	4.9096e-07	2.00907	1.00025	0.000758	7e-06	4e-05	2e-05	0.000286	5e-07	0.013	0	0.00873
65992-100	A16-BTW-MH1	ARGUS VI (Jan)	2018-01-26	0.283333	2.25	0.155398	0.0317169	4472.49	0.334905	16.9951	0.0760771	0.265722	0.018039	0.0465996	0.0500577	1.00246	0.0008806	0.541037	0.0546433	0.0232394	0.0030166	0.0054997	0.0009827	0.042942	0.0014606	0.0043748	0.0002635	262.852	1.1774	99.9099	0.0173433	741.301	2.73045	2.73499	2.23624e-16	NM-293D	0.0018994	4.9096e-07	2.03239	1.00025	0.000758	7e-06	4e-05	2e-05	0.000286	5e-07	0.013	0	0.00873
65992-101	A16-BTW-MH1	ARGUS VI (Jan)	2018-01-26	0.516667	2.25	0.0369201	0.0067693	1484.99	0.0798975	73.9712	0.0158714	0.923334	0.0027916	0.130557	0.0048506	1.00246	0.0008806	0.54028	0.054619	0.0232394	0.0030166	0.0054997	0.0009827	0.042942	0.0014606	0.0043759	0.0002635	20.0319	0.0047282	99.8524	0.0112096	68.3555	0.0158366	0.0234856	7.42497e-17	NM-293D	0.0018994	4.9096e-07	2.03277	1.00025	0.000758	7e-06	4e-05	2e-05	0.000286	5e-07	0.013	0	0.00873
65992-102	A16-BTW-MH1	ARGUS VI (Jan)	2018-01-26	0.616667	2.25	0.165417	0.0302104	4746.06	0.563777	12.0926	0.0736414	0.230758	0.0151595	0.086293	0.0460146	1.00246	0.0008806	0.539969	0.0546091	0.0232394	0.0030166	0.0054997	0.0009827	0.042942	0.0014606	0.0043763	0.0002635	392.312	2.38994	99.9841	0.0193537	1019.3	4.76143	4.76572	2.37303e-16	NM-293D	0.0018994	4.9096e-07	2.03293	1.00025	0.000758	7e-06	4e-05	2e-05	0.000286	5e-07	0.013	0	0.00873
65992-103	A16-BTW-MH1	ARGUS VI (Jan)	2018-01-26	0.7	2.25	0.110806	0.0202426	827.185	0.155767	29.122	0.041454	0.417158	0.0157314	0.088691	0.0241915	1.00246	0.0008806	0.539646	0.054599	0.0232394	0.0030166	0.0054997	0.0009827	0.042942	0.0014606	0.0043767	0.0002635	28.3241	0.041747	99.7736	0.0423716	95.9207	0.137738	0.13984	4.13592e-17	NM-293D	0.0018994	4.9096e-07	2.03309	1.00025	0.000758	7e-06	4e-05	2e-05	0.000286	5e-07	0.013	0	0.00873
65992-104	A16-BTW-MH1	ARGUS VI (Jan)	2018-01-26	0.966667	2.25	0.135157	0.0326112	2118.05	0.371742	103.212	0.0840067	1.51012	0.0229769	0.213661	0.0613578	1.00246	0.0008806	0.538777	0.0545721	0.0232394	0.0030166	0.0054997	0.0009827	0.042942	0.0014606	0.0043777	0.0002635	20.4368	0.0195204	99.6552	0.0527467	69.7113	0.0653332	0.0676832	1.05903e-16	NM-293D	0.0018994	4.9096e-07	2.03351	1.00025	0.000758	7e-06	4e-05	2e-05	0.000286	5e-07	0.013	0	0.00873
65992-105	A16-BTW-MH1	ARGUS VI (Jan)	2018-01-26	1.18333	2.25	0.0310344	0.0069799	1015.16	0.0711045	50.8924	0.0145263	0.641525	0.0024849	0.0807266	0.0048155	1.00246	0.0008806	0.538006	0.054549	0.0232394	0.0030166	0.0054997	0.0009827	0.042942	0.0014606	0.0043784	0.0002634	19.9158	0.0062307	99.911	0.0145863	67.9664	0.0208735	0.0270763	5.07582e-17	NM-293D	0.0018994	4.9096e-07	2.03389	1.00025	0.000758	7e-06	4e-05	2e-05	0.000286	5e-07	0.013	0	0.00873
65992-106	A16-BTW-MH1	ARGUS VI (Jan)	2018-01-26	1.41667	2.25	0.0320753	0.0072419	701.375	0.0649847	35.0124	0.0122653	0.436679	0.0026181	0.064544	0.0050335	1.00246	0.0008806	0.537228	0.0545267	0.0232394	0.0030166	0.0054997	0.0009827	0.042942	0.0014606	0.0043791	0.0002634	20.0039	0.007816	99.9275	0.019607	68.2618	0.0261803	0.0313907	3.50687e-17	NM-293D	0.0018994	4.9096e-07	2.03427	1.00025	0.000758	7e-06	4e-05	2e-05	0.000286	5e-07	0.013	0	0.00873
65992-107	A16-BTW-MH1	ARGUS VI (Jan)	2018-01-26	8.33333	2.25	0.0710531	0.0193191	513.483	0.107415	23.6047	0.0570069	0.310692	0.0137587	0.0507857	0.0251758	1.00246	0.0008806	0.513397	0.0547098	0.0232394	0.0030166	0.0054997	0.0009827	0.042942	0.0014606	0.0043529	0.0002658	21.676	0.0530951	99.7096	0.0453025	73.854	0.177304	0.178288	2.56741e-17	NM-293D	0.0018994	4.9096e-07	2.04589	1.00026	0.000758	7e-06	4e-05	2e-05	0.000286	5e-07	0.013	0	0.00873
65992-108	A16-BTW-MH1	ARGUS VI (Jan)	2018-01-26	8.7	2.25	0.0737133	0.0163539	644.049	0.123068	28.0276	0.035871	0.406783	0.0156962	0.124003	0.0229172	1.00246	0.0008806	0.512314	0.0547604	0.0232394	0.0030166	0.0054997	0.0009827	0.042942	0.0014606	0.0043493	0.0002661	22.9251	0.0306586	99.8278	0.0430229	78.0205	0.102147	0.104038	3.22025e-17	NM-293D	0.0018994	4.9096e-07	2.0465	1.00026	0.000758	7e-06	4e-05	2e-05	0.000286	5e-07	0.013	0	0.00873
65992-109	A16-BTW-MH1	ARGUS VI (Jan)	2018-01-26	8.91667	2.25	0.028069	0.0066815	1005.2	0.0718847	50.2344	0.0150029	0.627973	0.0025303	0.0709168	0.0048211	1.00246	0.0008806	0.511663	0.0547918	0.0232394	0.0030166	0.0054997	0.0009827	0.042942	0.0014606	0.004347	0.0002663	19.9825	0.0064809	99.9308	0.0145165	68.19	0.021709	0.0277602	5.02599e-17	NM-293D	0.0018994	4.9096e-07	2.04688	1.00026	0.000758	7e-06	4e-05	2e-05	0.000286	5e-07	0.013	0	0.00873
65992-11	A16-BTW-MH1	ARGUS VI (Jan)	2018-01-25	10.3667	2.25	0.0350294	0.0137586	588.787	0.0938139	28.9148	0.0279072	0.379226	0.0100148	0.0719041	0.0169066	1.00246	0.0008806	0.549263	0.0551158	0.0232394	0.0030166	0.0054997	0.0009827	0.042942	0.0014606	0.0040698	0.000283	20.2651	0.0208314	99.5871	0.0385417	69.1364	0.0697429	0.071914	2.94394e-17	NM-293D	0.0018994	4.9096e-07	2.00924	1.00025	0.000758	7e-06	4e-05	2e-05	0.000286	5e-07	0.013	0	0.00873
65992-110	A16-BTW-MH1	ARGUS VI (Jan)	2018-01-26	9.01667	2.25	0.0770105	0.0165589	1619.94	0.216698	79.4794	0.0522125	1.0788	0.0176318	0.187532	0.0176316	1.00246	0.0008806	0.511391	0.0548051	0.0232394	0.0030166	0.0054997	0.0009827	0.042942	0.0014606	0.004346	0.0002664	20.3344	0.0140246	99.8351	0.0248032	69.3684	0.0469482	0.050137	8.0997e-17	NM-293D	0.0018994	4.9096e-07	2.04704	1.00026	0.000758	7e-06	4e-05	2e-05	0.000286	5e-07	0.013	0	0.00873
65992-111	A16-BTW-MH1	ARGUS VI (Jan)	2018-01-26	9.11667	2.25	0.0847175	0.0182829	614.431	0.129849	29.8931	0.0397867	0.429571	0.0166684	0.0827661	0.0292806	1.00246	0.0008806	0.511128	0.054818	0.0232394	0.0030166	0.0054997	0.0009827	0.042942	0.0014606	0.004345	0.0002664	20.4107	0.0298067	99.3689	0.0631832	69.6239	0.0997654	0.101316	3.07216e-17	NM-293D	0.0018994	4.9096e-07	2.0472	1.00026	0.000758	7e-06	4e-05	2e-05	0.000286	5e-07	0.013	0	0.00873
65992-112	A16-BTW-MH1	ARGUS VI (Jan)	2018-01-26	9.33333	2.25	0.0265527	0.0071517	1201.48	0.0706925	60.005	0.014485	0.751034	0.0025128	0.11283	0.005144	1.00246	0.0008806	0.510498	0.0548491	0.0232394	0.0030166	0.0054997	0.0009827	0.042942	0.0014606	0.0043425	0.0002666	20.0012	0.0052712	99.9602	0.0121061	68.2527	0.0176564	0.0247312	6.00739e-17	NM-293D	0.0018994	4.9096e-07	2.04757	1.00026	0.000758	7e-06	4e-05	2e-05	0.000286	5e-07	0.013	0	0.00873
65992-113	A16-BTW-MH1	ARGUS VI (Jan)	2018-01-26	9.45	2.25	-0.0357106	0.0112445	764.412	0.0754114	37.8197	0.0170417	0.489355	0.005914	0.0625285	0.0110217	1.00246	0.0008806	0.510171	0.0548653	0.0232394	0.0030166	0.0054997	0.0009827	0.042942	0.0014606	0.0043412	0.0002667	20.1895	0.0097684	99.9571	0.0201615	68.8831	0.0327089	0.0370839	3.82206e-17	NM-293D	0.0018994	4.9096e-07	2.04777	1.00026	0.000758	7e-06	4e-05	2e-05	0.000286	5e-07	0.013	0	0.00873
65992-114	A16-BTW-MH1	ARGUS VI (Jan)	2018-01-26	9.66667	2.25	0.0430124	0.018339	888.714	0.117804	41.022	0.0465983	0.596064	0.0185932	0.138874	0.022897	1.00246	0.0008806	0.509598	0.0548938	0.0232394	0.0030166	0.0054997	0.0009827	0.042942	0.0014606	0.0043388	0.0002668	21.6198	0.0254438	99.8596	0.0333065	73.6662	0.0849747	0.0870002	4.44357e-17	NM-293D	0.0018994	4.9096e-07	2.04813	1.00026	0.000758	7e-06	4e-05	2e-05	0.000286	5e-07	0.013	0	0.00873
65992-115	A16-BTW-MH1	ARGUS VI (Jan)	2018-01-26	9.88333	2.25	0.0424058	0.0069682	1476.25	0.122747	73.7701	0.0108835	0.927541	0.0027337	0.141509	0.0051131	1.00246	0.0008806	0.509008	0.054923	0.0232394	0.0030166	0.0054997	0.0009827	0.042942	0.0014606	0.0043361	0.000267	19.9776	0.0036058	99.8996	0.0133223	68.1736	0.0120785	0.0210973	7.38124e-17	NM-293D	0.0018994	4.9096e-07	2.04851	1.00026	0.000758	7e-06	4e-05	2e-05	0.000286	5e-07	0.013	0	0.00873
65992-116	A16-BTW-MH1	ARGUS VI (Jan)	2018-01-26	9.98333	2.25	-0.0099198	0.021742	526.014	0.0835032	1.63845	0.0249521	0.0643389	0.0122721	0.0335592	0.020345	1.00246	0.0008806	0.508772	0.0549345	0.0232394	0.0030166	0.0054997	0.0009827	0.042942	0.0014606	0.004335	0.0002671	320.438	4.88132	99.8367	0.0352512	870.198	10.5503	10.5518	2.63007e-17	NM-293D	0.0018994	4.9096e-07	2.04866	1.00026	0.000758	7e-06	4e-05	2e-05	0.000286	5e-07	0.013	0	0.00873
65992-117	A16-BTW-MH1	ARGUS VI (Jan)	2018-01-26	10.0667	2.25	0.0690906	0.0205248	953.665	0.128506	42.7821	0.0466786	0.601259	0.0156573	0.117768	0.0267238	1.00246	0.0008806	0.508536	0.054946	0.0232394	0.0030166	0.0054997	0.0009827	0.042942	0.0014606	0.0043339	0.0002671	22.2527	0.0253254	99.8916	0.0348948	75.7788	0.0844816	0.0866332	4.76833e-17	NM-293D	0.0018994	4.9096e-07	2.04881	1.00026	0.000758	7e-06	4e-05	2e-05	0.000286	5e-07	0.013	0	0.00873
65992-118	A16-BTW-MH1	ARGUS VI (Jan)	2018-01-26	10.1667	2.25	0.097342	0.0196141	943.938	0.143244	16.0336	0.0366157	0.255706	0.0123193	0.0634419	0.0236212	1.00246	0.0008806	0.508281	0.0549583	0.0232394	0.0030166	0.0054997	0.0009827	0.042942	0.0014606	0.0043327	0.0002672	58.6548	0.135147	99.6703	0.03381	193.353	0.422782	0.425434	4.71969e-17	NM-293D	0.0018994	4.9096e-07	2.04898	1.00026	0.000758	7e-06	4e-05	2e-05	0.000286	5e-07	0.013	0	0.00873
65992-119	A16-BTW-MH1	ARGUS VI (Jan)	2018-01-26	10.7833	2.25	0.0756474	0.0184244	545.35	0.121899	24.4523	0.0381875	0.36099	0.0125873	0.0545328	0.0287655	1.00246	0.0008806	0.506779	0.0550274	0.0232394	0.0030166	0.0054997	0.0009827	0.042942	0.0014606	0.0043247	0.0002676	22.2506	0.0372227	99.8312	0.0637401	75.7716	0.12417	0.125643	2.72675e-17	NM-293D	0.0018994	4.9096e-07	2.05003	1.00026	0.000758	7e-06	4e-05	2e-05	0.000286	5e-07	0.013	0	0.00873
65992-12	A16-BTW-MH1	ARGUS VI (Jan)	2018-01-25	10.45	2.25	0.0610409	0.0349352	2062.41	0.494608	94.3498	0.146307	1.37877	0.0273412	0.178897	0.0645125	1.00246	0.0008806	0.549573	0.0549964	0.0232394	0.0030166	0.0054997	0.0009827	0.042942	0.0014606	0.0040733	0.0002816	21.8185	0.0349864	99.8786	0.047088	74.3299	0.116802	0.118309	1.0312e-16	NM-293D	0.0018994	4.9096e-07	2.00938	1.00025	0.000758	7e-06	4e-05	2e-05	0.000286	5e-07	0.013	0	0.00873
65992-120	A16-BTW-MH1	ARGUS VI (Jan)	2018-01-26	10.8833	2.25	0.09191	0.0180784	441.131	0.117372	20.3125	0.0434257	0.336172	0.0141331	0.0313173	0.02719	1.00246	0.0008806	0.50656	0.0550367	0.0232394	0.0030166	0.0054997	0.0009827	0.042942	0.0014606	0.0043235	0.0002676	21.6696	0.0481068	99.8462	0.0650896	73.8327	0.160648	0.161733	2.20565e-17	NM-293D	0.0018994	4.9096e-07	2.05019	1.00026	0.000758	7e-06	4e-05	2e-05	0.000286	5e-07	0.013	0	0.00873
65992-121	A16-BTW-MH1	ARGUS VI (Jan)	2018-01-26	10.9833	2.25	0.0773549	0.0204247	932.253	0.158783	42.4612	0.0578636	0.602867	0.0149063	0.102055	0.0265687	1.00246	0.0008806	0.506328	0.0550462	0.0232394	0.0030166	0.0054997	0.0009827	0.042942	0.0014606	0.0043221	0.0002677	21.9173	0.0307369	99.8913	0.037005	74.6595	0.102596	0.104325	4.66127e-17	NM-293D	0.0018994	4.9096e-07	2.05037	1.00026	0.000758	7e-06	4e-05	2e-05	0.000286	5e-07	0.013	0	0.00873
65992-122	A16-BTW-MH1	ARGUS VI (Jan)	2018-01-26	11.2167	2.25	0.0609417	0.0068754	1246.43	0.103329	62.2507	0.0101758	0.780315	0.0026731	0.121011	0.0050949	1.00246	0.0008806	0.505835	0.0550654	0.0232394	0.0030166	0.0054997	0.0009827	0.042942	0.0014606	0.004319	0.0002677	19.9976	0.0039583	99.9436	0.0139151	68.2405	0.0132586	0.0218076	6.23213e-17	NM-293D	0.0018994	4.9096e-07	2.05074	1.00026	0.000758	7e-06	4e-05	2e-05	0.000286	5e-07	0.013	0	0.00873
65992-13	A16-BTW-MH1	ARGUS VI (Jan)	2018-01-25	10.55	2.25	0.0246246	0.0240311	601.768	0.126701	29.5262	0.0406748	0.442388	0.0112148	0.101301	0.0238354	1.00246	0.0008806	0.549916	0.0548677	0.0232394	0.0030166	0.0054997	0.0009827	0.042942	0.0014606	0.0040772	0.0002801	20.3325	0.0299655	99.83	0.0562084	69.3619	0.100311	0.101843	3.00884e-17	NM-293D	0.0018994	4.9096e-07	2.00953	1.00025	0.000758	7e-06	4e-05	2e-05	0.000286	5e-07	0.013	0	0.00873
65992-14	A16-BTW-MH1	ARGUS VI (Jan)	2018-01-25	10.7667	2.25	0.0658897	0.0168644	403.707	0.0930428	19.745	0.0340771	0.32544	0.0147965	0.106497	0.0270764	1.00246	0.0008806	0.550661	0.0546028	0.0232394	0.0030166	0.0054997	0.0009827	0.042942	0.0014606	0.0040858	0.000277	20.2375	0.0376485	99.0466	0.0722935	69.0441	0.126053	0.127263	2.01854e-17	NM-293D	0.0018994	4.9096e-07	2.00989	1.00025	0.000758	7e-06	4e-05	2e-05	0.000286	5e-07	0.013	0	0.00873
65992-15	A16-BTW-MH1	ARGUS VI (Jan)	2018-01-25	10.85	2.25	0.051693	0.0189365	318.19	0.103346	14.3729	0.0459036	0.222642	0.0171519	0.0061192	0.0311929	1.00246	0.0008806	0.550977	0.0544963	0.0232394	0.0030166	0.0054997	0.0009827	0.042942	0.0014606	0.0040895	0.0002757	22.0317	0.0726664	99.5833	0.0877119	75.0413	0.242502	0.243246	1.59095e-17	NM-293D	0.0018994	4.9096e-07	2.01005	1.00025	0.000758	7e-06	4e-05	2e-05	0.000286	5e-07	0.013	0	0.00873
65992-16	A16-BTW-MH1	ARGUS VI (Jan)	2018-01-25	10.95	2.25	0.0389716	0.0190794	1710	0.227976	83.1011	0.0541033	1.16031	0.0132728	0.186717	0.0221327	1.00246	0.0008806	0.551288	0.0543955	0.0232394	0.0030166	0.0054997	0.0009827	0.042942	0.0014606	0.0040933	0.0002744	20.5432	0.0140452	99.9008	0.0246832	70.0671	0.046999	0.0502458	8.55001e-17	NM-293D	0.0018994	4.9096e-07	2.0102	1.00025	0.000758	7e-06	4e-05	2e-05	0.000286	5e-07	0.013	0	0.00873
65992-17	A16-BTW-MH1	ARGUS VI (Jan)	2018-01-25	11.05	2.25	0.0382494	0.0236445	270.085	0.0962023	12.3774	0.0395429	0.227943	0.0172338	0.0781492	0.0247705	1.00246	0.0008806	0.551594	0.0542998	0.0232394	0.0030166	0.0054997	0.0009827	0.042942	0.0014606	0.004097	0.0002732	21.6994	0.0721277	99.5071	0.0975202	73.932	0.24085	0.241577	1.35042e-17	NM-293D	0.0018994	4.9096e-07	2.01036	1.00025	0.000758	7e-06	4e-05	2e-05	0.000286	5e-07	0.013	0	0.00873
65992-18	A16-BTW-MH1	ARGUS VI (Jan)	2018-01-25	11.1333	2.25	0.244561	0.0299729	3728.72	0.623154	25.5929	0.0795475	0.453445	0.0174282	0.0213547	0.0689311	1.00246	0.0008806	0.551855	0.0542211	0.0232394	0.0030166	0.0054997	0.0009827	0.042942	0.0014606	0.0041003	0.0002722	145.419	0.453101	99.8424	0.0272145	446.446	1.23441	1.23865	1.86436e-16	NM-293D	0.0018994	4.9096e-07	2.0105	1.00025	0.000758	7e-06	4e-05	2e-05	0.000286	5e-07	0.013	0	0.00873
65992-19	A16-BTW-MH1	ARGUS VI (Jan)	2018-01-25	11.4	2.25	0.0581987	0.0186551	849.002	0.1541	38.8703	0.0509432	0.546827	0.012214	0.0382369	0.0280913	1.00246	0.0008806	0.552653	0.0539985	0.0232394	0.0030166	0.0054997	0.0009827	0.042942	0.0014606	0.0041106	0.0002691	21.802	0.0293632	99.8818	0.0357142	74.2746	0.0980317	0.0998208	4.24501e-17	NM-293D	0.0018994	4.9096e-07	2.01094	1.00025	0.000758	7e-06	4e-05	2e-05	0.000286	5e-07	0.013	0	0.00873
65992-20	A16-BTW-MH1	ARGUS VI (Jan)	2018-01-25	11.4833	2.25	0.143949	0.0279978	3475.84	0.570467	13.5155	0.100405	0.342503	0.024754	0.0774654	0.0498144	1.00246	0.0008806	0.552914	0.0539317	0.0232394	0.0030166	0.0054997	0.0009827	0.042942	0.0014606	0.0041141	0.0002681	256.667	1.90812	99.8305	0.0318174	726.9	4.45996	4.46265	1.73792e-16	NM-293D	0.0018994	4.9096e-07	2.0111	1.00025	0.000758	7e-06	4e-05	2e-05	0.000286	5e-07	0.013	0	0.00873
65992-21	A16-BTW-MH1	ARGUS VI (Jan)	2018-01-25	11.5833	2.25	0.002973	0.0212004	620.599	0.0907747	28.513	0.0416846	0.442844	0.0159643	0.214828	0.0219198	1.00246	0.0008806	0.553181	0.0538667	0.0232394	0.0030166	0.0054997	0.0009827	0.042942	0.0014606	0.0041177	0.0002672	21.7136	0.0328534	99.8255	0.0413538	73.9796	0.109702	0.111291	3.10299e-17	NM-293D	0.0018994	4.9096e-07	2.01126	1.00025	0.000758	7e-06	4e-05	2e-05	0.000286	5e-07	0.013	0	0.00873
65992-22	A16-BTW-MH1	ARGUS VI (Jan)	2018-01-25	11.6833	2.25	0.0397661	0.0170217	534.535	0.110487	23.6266	0.0527278	0.343799	0.013339	0.0972569	0.0239507	1.00246	0.0008806	0.553437	0.0538075	0.0232394	0.0030166	0.0054997	0.0009827	0.042942	0.0014606	0.0041213	0.0002663	22.5162	0.0519897	99.5848	0.0621646	76.6574	0.173346	0.174429	2.67267e-17	NM-293D	0.0018994	4.9096e-07	2.01142	1.00025	0.000758	7e-06	4e-05	2e-05	0.000286	5e-07	0.013	0	0.00873
65992-23	A16-BTW-MH1	ARGUS VI (Jan)	2018-01-25	11.7833	2.25	0.0306042	0.020009	873.833	0.122988	39.063	0.0475406	0.562263	0.0152233	0.137635	0.0292711	1.00246	0.0008806	0.553687	0.0537529	0.0232394	0.0030166	0.0054997	0.0009827	0.042942	0.0014606	0.0041248	0.0002654	22.3117	0.027771	99.8032	0.0293979	75.9754	0.0926299	0.0946062	4.36917e-17	NM-293D	0.0018994	4.9096e-07	2.01158	1.00025	0.000758	7e-06	4e-05	2e-05	0.000286	5e-07	0.013	0	0.00873
65992-24	A16-BTW-MH1	ARGUS VI (Jan)	2018-01-25	12	2.25	-0.0045922	0.0070389	494.662	0.0613254	20.3325	0.0118123	0.311986	0.0024202	0.0366124	0.0050523	1.00246	0.0008806	0.554243	0.0536431	0.0232394	0.0030166	0.0054997	0.0009827	0.042942	0.0014606	0.004133	0.0002635	19.8701	0.0203008	81.7234	0.0694137	67.8134	0.0680157	0.0701587	2.47331e-17	NM-293D	0.0018994	4.9096e-07	2.01195	1.00025	0.000758	7e-06	4e-05	2e-05	0.000286	5e-07	0.013	0	0.00873
65992-25	A16-BTW-MH1	ARGUS VI (Jan)	2018-01-25	12.2167	2.25	0.014493	0.0071326	745.701	0.0695341	37.4643	0.0156467	0.462629	0.0026103	0.0692599	0.0054167	1.00246	0.0008806	0.554724	0.0535622	0.0232394	0.0030166	0.0054997	0.0009827	0.042942	0.0014606	0.0041404	0.000262	19.8331	0.0090646	99.7107	0.0206962	67.6894	0.0303722	0.034893	3.72851e-17	NM-293D	0.0018994	4.9096e-07	2.01229	1.00025	0.000758	7e-06	4e-05	2e-05	0.000286	5e-07	0.013	0	0.00873
65992-26	A16-BTW-MH1	ARGUS VI (Jan)	2018-01-25	12.3167	2.25	0.0489078	0.0222793	252.953	0.093832	11.6051	0.0367377	0.206226	0.0145552	0.0547935	0.0306548	1.00246	0.0008806	0.55494	0.0535303	0.0232394	0.0030166	0.0054997	0.0009827	0.042942	0.0014606	0.0041439	0.0002613	21.6649	0.0723669	99.4597	0.111881	73.817	0.241664	0.242386	1.26476e-17	NM-293D	0.0018994	4.9096e-07	2.01245	1.00025	0.000758	7e-06	4e-05	2e-05	0.000286	5e-07	0.013	0	0.00873
65992-27	A16-BTW-MH1	ARGUS VI (Jan)	2018-01-25	12.7	2.25	0.0996398	0.0200936	660.134	0.14019	30.201	0.0462847	0.437375	0.0180998	0.0822253	0.0264832	1.00246	0.0008806	0.555716	0.0534422	0.0232394	0.0030166	0.0054997	0.0009827	0.042942	0.0014606	0.0041572	0.000259	21.8126	0.0344679	99.8565	0.0436975	74.3099	0.115072	0.116601	3.30067e-17	NM-293D	0.0018994	4.9096e-07	2.01309	1.00025	0.000758	7e-06	4e-05	2e-05	0.000286	5e-07	0.013	0	0.00873
65992-28	A16-BTW-MH1	ARGUS VI (Jan)	2018-01-25	12.7833	2.25	0.0505797	0.0171763	444.687	0.104904	19.9418	0.0443572	0.328308	0.0113906	0.0672406	0.0310271	1.00246	0.0008806	0.555891	0.0534285	0.0232394	0.0030166	0.0054997	0.0009827	0.042942	0.0014606	0.0041605	0.0002586	22.2289	0.0508538	99.7481	0.0579714	75.6993	0.169648	0.170728	2.22343e-17	NM-293D	0.0018994	4.9096e-07	2.01325	1.00025	0.000758	7e-06	4e-05	2e-05	0.000286	5e-07	0.013	0	0.00873
65992-29	A16-BTW-MH1	ARGUS VI (Jan)	2018-01-25	13.05	2.25	0.083963	0.0181008	410.932	0.0940311	18.54	0.0395018	0.240633	0.012297	0.0218669	0.0215438	1.00246	0.0008806	0.556346	0.0534058	0.0232394	0.0030166	0.0054997	0.0009827	0.042942	0.0014606	0.0041693	0.0002574	22.0746	0.0496505	99.6581	0.0751164	75.1846	0.16568	0.166771	2.05466e-17	NM-293D	0.0018994	4.9096e-07	2.01369	1.00025	0.000758	7e-06	4e-05	2e-05	0.000286	5e-07	0.013	0	0.00873
65992-30	A16-BTW-MH1	ARGUS VI (Jan)	2018-01-25	13.15	2.25	0.0864058	0.0222018	1084.63	0.15678	49.4746	0.0426783	0.690399	0.0179502	0.134485	0.030214	1.00246	0.0008806	0.556498	0.0534027	0.0232394	0.0030166	0.0054997	0.0009827	0.042942	0.0014606	0.0041725	0.000257	21.7913	0.0202259	99.4634	0.036909	74.2388	0.0675272	0.0700969	5.42315e-17	NM-293D	0.0018994	4.9096e-07	2.01385	1.00025	0.000758	7e-06	4e-05	2e-05	0.000286	5e-07	0.013	0	0.00873
65992-31	A16-BTW-MH1	ARGUS VI (Jan)	2018-01-25	13.6	2.25	0.0550715	0.0164433	240.759	0.0758034	10.61	0.0434124	0.201659	0.011791	0.0122844	0.0208376	1.00246	0.0008806	0.557116	0.0534194	0.0232394	0.0030166	0.0054997	0.0009827	0.042942	0.0014606	0.0041868	0.0002557	22.5463	0.0962839	99.4218	0.125019	76.7579	0.321017	0.321604	1.2038e-17	NM-293D	0.0018994	4.9096e-07	2.01458	1.00025	0.000758	7e-06	4e-05	2e-05	0.000286	5e-07	0.013	0	0.00873
65992-32	A16-BTW-MH1	ARGUS VI (Jan)	2018-01-25	13.6833	2.25	0.0239395	0.0217945	1415.49	0.132974	2.26327	0.0292613	0.0651945	0.0114851	0.0262142	0.0188174	1.00246	0.0008806	0.557228	0.0534287	0.0232394	0.0030166	0.0054997	0.0009827	0.042942	0.0014606	0.0041897	0.0002555	625.124	8.08294	99.9776	0.018381	1432.72	12.848	12.8505	7.07746e-17	NM-293D	0.0018994	4.9096e-07	2.01474	1.00025	0.000758	7e-06	4e-05	2e-05	0.000286	5e-07	0.013	0	0.00873
65992-33	A16-BTW-MH1	ARGUS VI (Jan)	2018-01-25	13.7833	2.25	0.0542525	0.020858	1135.47	0.175896	51.9194	0.049047	0.727042	0.0159092	0.120687	0.0265661	1.00246	0.0008806	0.557338	0.0534401	0.0232394	0.0030166	0.0054997	0.0009827	0.042942	0.0014606	0.0041927	0.0002553	21.8167	0.0215637	99.8218	0.0327832	74.3239	0.0719905	0.0744115	5.67734e-17	NM-293D	0.0018994	4.9096e-07	2.0149	1.00025	0.000758	7e-06	4e-05	2e-05	0.000286	5e-07	0.013	0	0.00873
65992-34	A16-BTW-MH1	ARGUS VI (Jan)	2018-01-25	14	2.25	0.0168546	0.0071926	679.248	0.0649766	33.9397	0.0133775	0.433897	0.0023796	0.254724	0.0050269	1.00246	0.0008806	0.557569	0.0534731	0.0232394	0.0030166	0.0054997	0.0009827	0.042942	0.0014606	0.0041996	0.0002549	19.9565	0.0086783	99.783	0.0206516	68.1028	0.0290711	0.033819	3.39624e-17	NM-293D	0.0018994	4.9096e-07	2.01527	1.00025	0.000758	7e-06	4e-05	2e-05	0.000286	5e-07	0.013	0	0.00873
65992-35	A16-BTW-MH1	ARGUS VI (Jan)	2018-01-25	14.1	2.25	0.0559268	0.0218944	447.814	0.101122	20.5431	0.0429675	0.328969	0.0166044	0.057404	0.0245252	1.00246	0.0008806	0.557658	0.0534898	0.0232394	0.0030166	0.0054997	0.0009827	0.042942	0.0014606	0.0042024	0.0002548	21.713	0.0477569	99.6711	0.0712038	73.9775	0.159467	0.160564	2.23907e-17	NM-293D	0.0018994	4.9096e-07	2.01543	1.00025	0.000758	7e-06	4e-05	2e-05	0.000286	5e-07	0.013	0	0.00873
65992-36	A16-BTW-MH1	ARGUS VI (Jan)	2018-01-25	14.2	2.25	0.0902462	0.0194336	290.717	0.107108	13.3663	0.0382984	0.181997	0.0090037	0.0690659	0.0279317	1.00246	0.0008806	0.557741	0.053508	0.0232394	0.0030166	0.0054997	0.0009827	0.042942	0.0014606	0.0042053	0.0002547	21.6486	0.0655629	99.5985	0.104022	73.7626	0.218949	0.219745	1.45358e-17	NM-293D	0.0018994	4.9096e-07	2.01559	1.00025	0.000758	7e-06	4e-05	2e-05	0.000286	5e-07	0.013	0	0.00873
65992-37	A16-BTW-MH1	ARGUS VI (Jan)	2018-01-25	14.3	2.25	0.0693922	0.0198195	471.101	0.0835924	21.5373	0.0466545	0.309835	0.0165581	0.058506	0.0297803	1.00246	0.0008806	0.557817	0.0535274	0.0232394	0.0030166	0.0054997	0.0009827	0.042942	0.0014606	0.0042082	0.0002546	21.6739	0.0491202	99.1502	0.0680709	73.8469	0.164031	0.165094	2.3555e-17	NM-293D	0.0018994	4.9096e-07	2.01574	1.00025	0.000758	7e-06	4e-05	2e-05	0.000286	5e-07	0.013	0	0.00873
65992-38	A16-BTW-MH1	ARGUS VI (Jan)	2018-01-25	14.3833	2.25	0.0160305	0.0169943	812.163	0.1133	37.2393	0.0547962	0.495624	0.0164679	0.139255	0.0266999	1.00246	0.0008806	0.557887	0.0535478	0.0232394	0.0030166	0.0054997	0.0009827	0.042942	0.0014606	0.004211	0.0002545	21.7771	0.0329512	99.9171	0.0376559	74.1916	0.110016	0.111609	4.06081e-17	NM-293D	0.0018994	4.9096e-07	2.0159	1.00025	0.000758	7e-06	4e-05	2e-05	0.000286	5e-07	0.013	0	0.00873
65992-39	A16-BTW-MH1	ARGUS VI (Jan)	2018-01-25	14.4833	2.25	0.0652354	0.0229782	1811.45	0.183345	30.3723	0.0503654	0.42576	0.0151842	0.105221	0.0271556	1.00246	0.0008806	0.557955	0.0535706	0.0232394	0.0030166	0.0054997	0.0009827	0.042942	0.0014606	0.0042139	0.0002545	59.0266	0.0997275	99.0078	0.0334379	194.515	0.311781	0.315409	9.05725e-17	NM-293D	0.0018994	4.9096e-07	2.01607	1.00025	0.000758	7e-06	4e-05	2e-05	0.000286	5e-07	0.013	0	0.00873
65992-40	A16-BTW-MH1	ARGUS VI (Jan)	2018-01-25	14.5833	2.25	0.182342	0.0296112	2862.28	0.320538	10.1045	0.0815704	0.197351	0.0254244	0.0182913	0.0403056	1.00246	0.0008806	0.558012	0.0535927	0.0232394	0.0030166	0.0054997	0.0009827	0.042942	0.0014606	0.0042166	0.0002544	282.457	2.28157	99.7412	0.0292784	786.211	5.1628	5.16545	1.43114e-16	NM-293D	0.0018994	4.9096e-07	2.01622	1.00025	0.000758	7e-06	4e-05	2e-05	0.000286	5e-07	0.013	0	0.00873
65992-41	A16-BTW-MH1	ARGUS VI (Jan)	2018-01-25	14.6833	2.25	0.0769226	0.0211113	536.307	0.117829	24.6834	0.0466417	0.377253	0.0122409	0.137783	0.0207456	1.00246	0.0008806	0.558064	0.0536163	0.0232394	0.0030166	0.0054997	0.0009827	0.042942	0.0014606	0.0042193	0.0002544	21.6502	0.0421886	99.7085	0.0520003	73.7677	0.140889	0.142123	2.68154e-17	NM-293D	0.0018994	4.9096e-07	2.01638	1.00025	0.000758	7e-06	4e-05	2e-05	0.000286	5e-07	0.013	0	0.00873
65992-42	A16-BTW-MH1	ARGUS VI (Jan)	2018-01-25	14.7667	2.25	0.0729764	0.0225658	416.603	0.10618	20.3872	0.0366516	0.328958	0.0145501	0.0219216	0.026447	1.00246	0.0008806	0.558111	0.0536405	0.0232394	0.0030166	0.0054997	0.0009827	0.042942	0.0014606	0.004222	0.0002544	20.3531	0.0388499	99.669	0.0685995	69.4309	0.130048	0.131235	2.08301e-17	NM-293D	0.0018994	4.9096e-07	2.01654	1.00025	0.000758	7e-06	4e-05	2e-05	0.000286	5e-07	0.013	0	0.00873
65992-43	A16-BTW-MH1	ARGUS VI (Jan)	2018-01-25	14.8667	2.25	0.089686	0.0216312	1857.03	0.263624	19.1014	0.0419128	0.287387	0.0154371	0.0451753	0.0238383	1.00246	0.0008806	0.558152	0.0536661	0.0232394	0.0030166	0.0054997	0.0009827	0.042942	0.0014606	0.0042247	0.0002544	96.6903	0.213559	99.4891	0.0286466	308.632	0.627305	0.631586	9.28513e-17	NM-293D	0.0018994	4.9096e-07	2.0167	1.00025	0.000758	7e-06	4e-05	2e-05	0.000286	5e-07	0.013	0	0.00873
65992-44	A16-BTW-MH1	ARGUS VI (Jan)	2018-01-25	14.9667	2.25	0.091807	0.0222693	557.572	0.143805	25.6119	0.0446483	0.376192	0.0134113	0.0785272	0.0249487	1.00246	0.0008806	0.558188	0.0536924	0.0232394	0.0030166	0.0054997	0.0009827	0.042942	0.0014606	0.0042274	0.0002544	21.693	0.0394063	99.7103	0.0568374	73.9106	0.131588	0.132913	2.78786e-17	NM-293D	0.0018994	4.9096e-07	2.01686	1.00025	0.000758	7e-06	4e-05	2e-05	0.000286	5e-07	0.013	0	0.00873
65992-45	A16-BTW-MH1	ARGUS VI (Jan)	2018-01-25	15.05	2.25	0.152604	0.0323599	3715.44	0.620488	20.8037	0.105983	0.449031	0.025003	0.0387649	0.0540882	1.00246	0.0008806	0.558215	0.0537158	0.0232394	0.0030166	0.0054997	0.0009827	0.042942	0.0014606	0.0042297	0.0002544	178.244	0.909401	99.8332	0.0318769	533.758	2.36213	2.36516	1.85772e-16	NM-293D	0.0018994	4.9096e-07	2.017	1.00025	0.000758	7e-06	4e-05	2e-05	0.000286	5e-07	0.013	0	0.00873
65992-46	A16-BTW-MH1	ARGUS VI (Jan)	2018-01-25	15.3167	2.25	0.216389	0.0267477	4256.01	0.452938	9.77326	0.0747189	0.225719	0.0259473	0.0253864	0.0479903	1.00246	0.0008806	0.558269	0.0537915	0.0232394	0.0030166	0.0054997	0.0009827	0.042942	0.0014606	0.0042368	0.0002546	434.084	3.31961	99.7073	0.0202846	1100.69	6.32599	6.32961	2.128e-16	NM-293D	0.0018994	4.9096e-07	2.01744	1.00025	0.000758	7e-06	4e-05	2e-05	0.000286	5e-07	0.013	0	0.00873
65992-47	A16-BTW-MH1	ARGUS VI (Jan)	2018-01-25	15.4167	2.25	0.0680339	0.018378	1781.1	0.201861	80.9655	0.0654072	1.14571	0.0195608	0.209047	0.0237637	1.00246	0.0008806	0.558279	0.0538201	0.0232394	0.0030166	0.0054997	0.0009827	0.042942	0.0014606	0.0042394	0.0002546	21.9667	0.0183224	99.9209	0.0235382	74.8244	0.0611527	0.0640218	8.9055e-17	NM-293D	0.0018994	4.9096e-07	2.0176	1.00025	0.000758	7e-06	4e-05	2e-05	0.000286	5e-07	0.013	0	0.00873
65992-48	A16-BTW-MH1	ARGUS VI (Jan)	2018-01-25	15.6	2.25	0.0220668	0.0070973	1283.53	0.0802827	64.2141	0.0182565	0.801909	0.0026848	0.123394	0.0058182	1.00246	0.0008806	0.558281	0.0538788	0.0232394	0.0030166	0.0054997	0.0009827	0.042942	0.0014606	0.0042445	0.0002548	19.956	0.0060985	99.9069	0.0128238	68.1011	0.0204292	0.0267569	6.41763e-17	NM-293D	0.0018994	4.9096e-07	2.01792	1.00025	0.000758	7e-06	4e-05	2e-05	0.000286	5e-07	0.013	0	0.00873
65992-49	A16-BTW-MH1	ARGUS VI (Jan)	2018-01-25	15.7	2.25	0.0888092	0.0224746	387.04	0.0883661	17.9009	0.0445585	0.34784	0.0164097	0.0925532	0.0316703	1.00246	0.0008806	0.558273	0.053908	0.0232394	0.0030166	0.0054997	0.0009827	0.042942	0.0014606	0.004247	0.0002549	21.5092	0.0568925	99.5458	0.0916195	73.2967	0.190042	0.190948	1.9352e-17	NM-293D	0.0018994	4.9096e-07	2.01808	1.00025	0.000758	7e-06	4e-05	2e-05	0.000286	5e-07	0.013	0	0.00873
65992-50	A16-BTW-MH1	ARGUS VI (Jan)	2018-01-25	15.8	2.25	0.0825214	0.0196092	1239.35	0.133569	60.8584	0.0720069	0.798928	0.0141392	0.125595	0.0232524	1.00246	0.0008806	0.558261	0.053937	0.0232394	0.0030166	0.0054997	0.0009827	0.042942	0.0014606	0.0042494	0.000255	20.2997	0.0246554	99.7499	0.0292016	69.2522	0.0825406	0.084389	6.19673e-17	NM-293D	0.0018994	4.9096e-07	2.01824	1.00025	0.000758	7e-06	4e-05	2e-05	0.000286	5e-07	0.013	0	0.00873
65992-51	A16-BTW-MH1	ARGUS VI (Jan)	2018-01-25	16.3167	2.25	0.0233091	0.0066929	572.728	0.0631515	28.6647	0.0124997	0.36069	0.0024147	0.0756588	0.0053403	1.00246	0.0008806	0.558105	0.0540933	0.0232394	0.0030166	0.0054997	0.0009827	0.042942	0.0014606	0.0042621	0.0002557	19.938	0.0096842	99.8568	0.0240146	68.0408	0.0324419	0.0367496	2.86364e-17	NM-293D	0.0018994	4.9096e-07	2.01909	1.00025	0.000758	7e-06	4e-05	2e-05	0.000286	5e-07	0.013	0	0.00873
65992-52	A16-BTW-MH1	ARGUS VI (Jan)	2018-01-25	16.4	2.25	0.0573146	0.0205483	812.798	0.15164	36.7369	0.0370603	0.542521	0.0162121	0.0998042	0.0246663	1.00246	0.0008806	0.55806	0.054122	0.0232394	0.0030166	0.0054997	0.0009827	0.042942	0.0014606	0.0042643	0.0002558	22.035	0.0235963	99.6579	0.0402465	75.0525	0.078745	0.0810065	4.06399e-17	NM-293D	0.0018994	4.9096e-07	2.01925	1.00025	0.000758	7e-06	4e-05	2e-05	0.000286	5e-07	0.013	0	0.00873
65992-53	A16-BTW-MH1	ARGUS VI (Jan)	2018-01-25	16.6333	2.25	0.0094434	0.0068124	370.599	0.0598691	18.5364	0.0116273	0.239707	0.0026091	0.0288633	0.0052629	1.00246	0.0008806	0.557933	0.0541888	0.0232394	0.0030166	0.0054997	0.0009827	0.042942	0.0014606	0.0042696	0.0002562	19.9525	0.0140128	99.8659	0.0353936	68.0896	0.0469415	0.0500198	1.85299e-17	NM-293D	0.0018994	4.9096e-07	2.01962	1.00025	0.000758	7e-06	4e-05	2e-05	0.000286	5e-07	0.013	0	0.00873
65992-54	A16-BTW-MH1	ARGUS VI (Jan)	2018-01-25	16.7333	2.25	0.060398	0.023351	921.186	0.122048	42.1292	0.0474783	0.632868	0.0138481	0.109486	0.0296678	1.00246	0.0008806	0.557868	0.0542178	0.0232394	0.0030166	0.0054997	0.0009827	0.042942	0.0014606	0.0042719	0.0002563	21.8036	0.0254572	99.7804	0.0330506	74.28	0.0849909	0.0870487	4.60593e-17	NM-293D	0.0018994	4.9096e-07	2.01979	1.00025	0.000758	7e-06	4e-05	2e-05	0.000286	5e-07	0.013	0	0.00873
65992-55	A16-BTW-MH1	ARGUS VI (Jan)	2018-01-25	16.8167	2.25	0.214431	0.0265731	4612.78	0.563154	11.478	0.0575792	0.156151	0.0242203	0.177322	0.0276244	1.00246	0.0008806	0.557803	0.0542448	0.0232394	0.0030166	0.0054997	0.0009827	0.042942	0.0014606	0.004274	0.0002565	401.564	2.01612	99.9467	0.0234018	1037.64	3.97664	3.98191	2.30639e-16	NM-293D	0.0018994	4.9096e-07	2.01994	1.00025	0.000758	7e-06	4e-05	2e-05	0.000286	5e-07	0.013	0	0.00873
65992-56	A16-BTW-MH1	ARGUS VI (Jan)	2018-01-25	16.9167	2.25	0.0360661	0.0216505	241.389	0.0777881	10.8641	0.0295637	0.20529	0.014143	0.0594306	0.0259864	1.00246	0.0008806	0.557729	0.0542726	0.0232394	0.0030166	0.0054997	0.0009827	0.042942	0.0014606	0.0042762	0.0002566	22.1095	0.0646495	99.5707	0.111	75.301	0.215717	0.216558	1.20694e-17	NM-293D	0.0018994	4.9096e-07	2.02011	1.00025	0.000758	7e-06	4e-05	2e-05	0.000286	5e-07	0.013	0	0.00873
65992-57	A16-BTW-MH1	ARGUS VI (Jan)	2018-01-25	17.0167	2.25	0.111047	0.0207395	407.672	0.0955516	19.9174	0.0383626	0.300396	0.0162233	0.0861334	0.0278881	1.00246	0.0008806	0.557653	0.0542994	0.0232394	0.0030166	0.0054997	0.0009827	0.042942	0.0014606	0.0042783	0.0002568	20.3336	0.0419136	99.4096	0.0764109	69.3657	0.140308	0.141407	2.03836e-17	NM-293D	0.0018994	4.9096e-07	2.02026	1.00025	0.000758	7e-06	4e-05	2e-05	0.000286	5e-07	0.013	0	0.00873
65992-58	A16-BTW-MH1	ARGUS VI (Jan)	2018-01-25	17.1167	2.25	0.0279725	0.0181849	413.524	0.105895	18.8424	0.0408902	0.320124	0.0170572	0.125658	0.0254299	1.00246	0.0008806	0.557571	0.0543259	0.0232394	0.0030166	0.0054997	0.0009827	0.042942	0.0014606	0.0042805	0.0002569	21.8603	0.0491983	99.671	0.0643938	74.4692	0.164236	0.165315	2.06762e-17	NM-293D	0.0018994	4.9096e-07	2.02042	1.00025	0.000758	7e-06	4e-05	2e-05	0.000286	5e-07	0.013	0	0.00873
65992-59	A16-BTW-MH1	ARGUS VI (Jan)	2018-01-25	17.2167	2.25	0.127861	0.020749	1090.85	0.140648	48.8635	0.0400715	0.657982	0.0131225	0.175133	0.024889	1.00246	0.0008806	0.557484	0.0543519	0.0232394	0.0030166	0.0054997	0.0009827	0.042942	0.0014606	0.0042825	0.0002571	22.2777	0.0189991	99.8541	0.0265969	75.8622	0.0633752	0.0662222	5.45427e-17	NM-293D	0.0018994	4.9096e-07	2.02058	1.00025	0.000758	7e-06	4e-05	2e-05	0.000286	5e-07	0.013	0	0.00873
65992-60	A16-BTW-MH1	ARGUS VI (Jan)	2018-01-25	17.3167	2.25	0.0213394	0.0156079	260.486	0.0947279	12.7803	0.0350235	0.217981	0.0107483	0.0117157	0.0255499	1.00246	0.0008806	0.557387	0.0543791	0.0232394	0.0030166	0.0054997	0.0009827	0.042942	0.0014606	0.0042847	0.0002573	20.268	0.0585232	99.5092	0.0971529	69.1461	0.195933	0.196717	1.30243e-17	NM-293D	0.0018994	4.9096e-07	2.02075	1.00025	0.000758	7e-06	4e-05	2e-05	0.000286	5e-07	0.013	0	0.00873
65992-61	A16-BTW-MH1	ARGUS VI (Jan)	2018-01-25	17.9167	2.25	0.106143	0.026172	2713.01	0.62733	17.7879	0.124181	0.39536	0.0208427	0.200321	0.0673874	1.00246	0.0008806	0.556703	0.0545277	0.0232394	0.0030166	0.0054997	0.0009827	0.042942	0.0014606	0.0042972	0.0002583	151.795	1.06249	99.5539	0.054661	463.736	2.86738	2.86934	1.3565e-16	NM-293D	0.0018994	4.9096e-07	2.02176	1.00025	0.000758	7e-06	4e-05	2e-05	0.000286	5e-07	0.013	0	0.00873
65992-62	A16-BTW-MH1	ARGUS VI (Jan)	2018-01-25	18.1333	2.25	0.0179191	0.0070487	785.875	0.0684845	39.359	0.0122725	0.493819	0.0025011	0.0879835	0.0053279	1.00246	0.0008806	0.556408	0.0545762	0.0232394	0.0030166	0.0054997	0.0009827	0.042942	0.0014606	0.0043016	0.0002587	19.9167	0.0069992	99.8173	0.0183672	67.9697	0.0234482	0.0291079	3.92938e-17	NM-293D	0.0018994	4.9096e-07	2.02213	1.00025	0.000758	7e-06	4e-05	2e-05	0.000286	5e-07	0.013	0	0.00873
65992-63	A16-BTW-MH1	ARGUS VI (Jan)	2018-01-25	18.2333	2.25	-0.0079102	0.0242389	548.848	0.131931	26.7853	0.0418158	0.387678	0.0159583	0.05304	0.0274352	1.00246	0.0008806	0.556272	0.0545962	0.0232394	0.0030166	0.0054997	0.0009827	0.042942	0.0014606	0.0043034	0.0002589	20.4297	0.0336411	99.7701	0.057321	69.6875	0.112596	0.113975	2.74424e-17	NM-293D	0.0018994	4.9096e-07	2.02229	1.00025	0.000758	7e-06	4e-05	2e-05	0.000286	5e-07	0.013	0	0.00873
65992-64	A16-BTW-MH1	ARGUS VI (Jan)	2018-01-25	18.4667	2.25	0.0271576	0.0074922	773.909	0.0674837	38.6707	0.0148744	0.480828	0.0024496	0.055483	0.0055865	1.00246	0.0008806	0.555942	0.0546398	0.0232394	0.0030166	0.0054997	0.0009827	0.042942	0.0014606	0.0043076	0.0002592	19.9854	0.0083172	99.9314	0.0180958	68.1996	0.02786	0.0327965	3.86955e-17	NM-293D	0.0018994	4.9096e-07	2.02266	1.00025	0.000758	7e-06	4e-05	2e-05	0.000286	5e-07	0.013	0	0.00873
65992-65	A16-BTW-MH1	ARGUS VI (Jan)	2018-01-25	18.55	2.25	0.118314	0.0317342	3560.2	0.670526	9.15337	0.0668789	0.185752	0.0194866	0.090617	0.0492871	1.00246	0.0008806	0.555796	0.0546571	0.0232394	0.0030166	0.0054997	0.0009827	0.042942	0.0014606	0.0043093	0.0002594	388.538	2.84037	99.9202	0.0297341	1011.77	5.68215	5.6857	1.7801e-16	NM-293D	0.0018994	4.9096e-07	2.02282	1.00025	0.000758	7e-06	4e-05	2e-05	0.000286	5e-07	0.013	0	0.00873
65992-66	A16-BTW-MH1	ARGUS VI (Jan)	2018-01-25	18.7833	2.25	0.0109172	0.0067327	595.293	0.0634769	29.8219	0.0076041	0.371381	0.0024349	0.0468706	0.0050612	1.00246	0.0008806	0.555434	0.0546956	0.0232394	0.0030166	0.0054997	0.0009827	0.042942	0.0014606	0.0043133	0.0002597	19.9257	0.0062388	99.8888	0.0210502	67.9997	0.0209003	0.0271022	2.97646e-17	NM-293D	0.0018994	4.9096e-07	2.02319	1.00025	0.000758	7e-06	4e-05	2e-05	0.000286	5e-07	0.013	0	0.00873
65992-67	A16-BTW-MH1	ARGUS VI (Jan)	2018-01-25	18.8667	2.25	0.163001	0.0283409	4112.93	0.641993	23.6092	0.0550546	0.332786	0.0189281	0.0431229	0.0568811	1.00246	0.0008806	0.555277	0.0547103	0.0232394	0.0030166	0.0054997	0.0009827	0.042942	0.0014606	0.004315	0.0002599	173.629	0.407299	99.6973	0.0296882	521.732	1.06491	1.07136	2.05647e-16	NM-293D	0.0018994	4.9096e-07	2.02335	1.00025	0.000758	7e-06	4e-05	2e-05	0.000286	5e-07	0.013	0	0.00873
65992-68	A16-BTW-MH1	ARGUS VI (Jan)	2018-01-25	19.1	2.25	0.0473662	0.0072322	740.286	0.0697107	36.8084	0.0087174	0.462034	0.0025119	0.243436	0.0052754	1.00246	0.0008806	0.554886	0.0547432	0.0232394	0.0030166	0.0054997	0.0009827	0.042942	0.0014606	0.0043188	0.0002602	19.9672	0.0057568	99.3479	0.0188316	68.1388	0.0192841	0.0258995	3.70143e-17	NM-293D	0.0018994	4.9096e-07	2.02372	1.00025	0.000758	7e-06	4e-05	2e-05	0.000286	5e-07	0.013	0	0.00873
65992-69	A16-BTW-MH1	ARGUS VI (Jan)	2018-01-25	19.2	2.25	0.0678825	0.0202324	760.086	0.144952	37.4828	0.0394933	0.521987	0.0171556	0.0911938	0.0328064	1.00246	0.0008806	0.554702	0.0547568	0.0232394	0.0030166	0.0054997	0.0009827	0.042942	0.0014606	0.0043205	0.0002604	20.2185	0.022907	99.7732	0.0456041	68.9805	0.0766985	0.0786693	3.80043e-17	NM-293D	0.0018994	4.9096e-07	2.02389	1.00025	0.000758	7e-06	4e-05	2e-05	0.000286	5e-07	0.013	0	0.00873
65992-70	A16-BTW-MH1	ARGUS VI (Jan)	2018-01-25	19.2833	2.25	0.0664463	0.0213451	664.726	0.112189	2.16287	0.0261931	0.0858999	0.0132921	-0.012957	0.0190495	1.00246	0.0008806	0.554531	0.0547684	0.0232394	0.0030166	0.0054997	0.0009827	0.042942	0.0014606	0.004322	0.0002605	306.411	3.7121	99.7286	0.0359271	839.628	8.15829	8.16015	3.32363e-17	NM-293D	0.0018994	4.9096e-07	2.02404	1.00025	0.000758	7e-06	4e-05	2e-05	0.000286	5e-07	0.013	0	0.00873
65992-71	A16-BTW-MH1	ARGUS VI (Jan)	2018-01-25	19.3833	2.25	0.042822	0.0202352	422.117	0.10458	19.3473	0.0442718	0.28821	0.013224	0.111829	0.0224672	1.00246	0.0008806	0.55435	0.0547799	0.0232394	0.0030166	0.0054997	0.0009827	0.042942	0.0014606	0.0043236	0.0002606	21.6945	0.0522437	99.4985	0.0783521	73.9156	0.174455	0.175457	2.11058e-17	NM-293D	0.0018994	4.9096e-07	2.0242	1.00025	0.000758	7e-06	4e-05	2e-05	0.000286	5e-07	0.013	0	0.00873
65992-72	A16-BTW-MH1	ARGUS VI (Jan)	2018-01-25	19.4833	2.25	0.0025521	0.0185277	1306.17	0.166353	59.6732	0.0665259	0.788412	0.013058	0.183865	0.0252166	1.00246	0.0008806	0.554163	0.0547908	0.0232394	0.0030166	0.0054997	0.0009827	0.042942	0.0014606	0.0043251	0.0002608	21.8559	0.0248025	99.9142	0.0245167	74.4546	0.0827971	0.0849177	6.53087e-17	NM-293D	0.0018994	4.9096e-07	2.02436	1.00025	0.000758	7e-06	4e-05	2e-05	0.000286	5e-07	0.013	0	0.00873
65992-73	A16-BTW-MH1	ARGUS VI (Jan)	2018-01-25	19.7	2.25	0.0254642	0.0070256	494.947	0.0621346	24.6812	0.012572	0.309801	0.0024808	0.0564203	0.0047707	1.00246	0.0008806	0.553715	0.0548133	0.0232394	0.0030166	0.0054997	0.0009827	0.042942	0.0014606	0.0043286	0.0002611	20.0061	0.0112766	99.8311	0.0271313	68.269	0.0377718	0.041554	2.47474e-17	NM-293D	0.0018994	4.9096e-07	2.02473	1.00025	0.000758	7e-06	4e-05	2e-05	0.000286	5e-07	0.013	0	0.00873
65992-74	A16-BTW-MH1	ARGUS VI (Jan)	2018-01-25	19.8	2.25	0.029589	0.0231954	705.92	0.121354	32.1553	0.0432371	0.483095	0.0151058	0.154636	0.0323909	1.00246	0.0008806	0.553523	0.0548215	0.0232394	0.0030166	0.0054997	0.0009827	0.042942	0.0014606	0.00433	0.0002612	21.8916	0.030673	99.7824	0.0427117	74.5738	0.102388	0.104115	3.5296e-17	NM-293D	0.0018994	4.9096e-07	2.02489	1.00025	0.000758	7e-06	4e-05	2e-05	0.000286	5e-07	0.013	0	0.00873
65992-75	A16-BTW-MH1	ARGUS VI (Jan)	2018-01-25	20.35	2.25	0.0848263	0.0221073	2853.14	0.316552	15.2558	0.0674814	0.279339	0.0227968	0.0876022	0.0428733	1.00246	0.0008806	0.552315	0.0548573	0.0232394	0.0030166	0.0054997	0.0009827	0.042942	0.0014606	0.004338	0.0002618	186.681	0.827117	99.8483	0.0273095	555.543	2.12298	2.12659	1.42657e-16	NM-293D	0.0018994	4.9096e-07	2.02581	1.00025	0.000758	7e-06	4e-05	2e-05	0.000286	5e-07	0.013	0	0.00873
65992-76	A16-BTW-MH1	ARGUS VI (Jan)	2018-01-25	20.45	2.25	0.091002	0.0167068	1099.76	0.166548	50.2529	0.0400952	0.726538	0.0119044	0.184739	0.029605	1.00246	0.0008806	0.552095	0.0548613	0.0232394	0.0030166	0.0054997	0.0009827	0.042942	0.0014606	0.0043393	0.0002619	21.8164	0.0184222	99.7531	0.0313744	74.3227	0.0615024	0.0643193	5.4988e-17	NM-293D	0.0018994	4.9096e-07	2.02597	1.00025	0.000758	7e-06	4e-05	2e-05	0.000286	5e-07	0.013	0	0.00873
65992-77	A16-BTW-MH1	ARGUS VI (Jan)	2018-01-25	20.6667	2.25	0.0165899	0.0069626	533.143	0.064495	26.7706	0.0120597	0.336525	0.0023509	0.0621963	0.0047184	1.00246	0.0008806	0.551564	0.0548681	0.0232394	0.0030166	0.0054997	0.0009827	0.042942	0.0014606	0.0043423	0.0002621	19.8853	0.0100433	99.9183	0.0258034	67.8642	0.0336481	0.0377987	2.66571e-17	NM-293D	0.0018994	4.9096e-07	2.02634	1.00025	0.000758	7e-06	4e-05	2e-05	0.000286	5e-07	0.013	0	0.00873
65992-78	A16-BTW-MH1	ARGUS VI (Jan)	2018-01-25	20.7667	2.25	0.0198782	0.0181634	562.276	0.116311	26.0563	0.0523964	0.382019	0.0136613	0.159378	0.0257916	1.00246	0.0008806	0.55134	0.05487	0.0232394	0.0030166	0.0054997	0.0009827	0.042942	0.0014606	0.0043436	0.0002622	21.5069	0.0442419	99.7293	0.0475562	73.2893	0.147785	0.148947	2.81138e-17	NM-293D	0.0018994	4.9096e-07	2.0265	1.00025	0.000758	7e-06	4e-05	2e-05	0.000286	5e-07	0.013	0	0.00873
65992-79	A16-BTW-MH1	ARGUS VI (Jan)	2018-01-25	20.9833	2.25	-0.0153947	0.0068955	535.384	0.0642054	26.8353	0.0076181	0.338663	0.0024765	0.0494934	0.0045102	1.00246	0.0008806	0.550788	0.0548721	0.0232394	0.0030166	0.0054997	0.0009827	0.042942	0.0014606	0.0043464	0.0002624	19.908	0.0069681	99.8546	0.0236963	67.9404	0.0233444	0.02902	2.67692e-17	NM-293D	0.0018994	4.9096e-07	2.02687	1.00025	0.000758	7e-06	4e-05	2e-05	0.000286	5e-07	0.013	0	0.00873
65992-80	A16-BTW-MH1	ARGUS VI (Jan)	2018-01-25	21.0833	2.25	0.141478	0.0300439	3620.33	0.550324	10.9268	0.0742544	0.213436	0.0226154	-0.0197078	0.046415	1.00246	0.0008806	0.550556	0.0548721	0.0232394	0.0030166	0.0054997	0.0009827	0.042942	0.0014606	0.0043475	0.0002625	330.454	2.24769	99.765	0.0323021	891.72	4.80128	4.80474	1.81016e-16	NM-293D	0.0018994	4.9096e-07	2.02703	1.00025	0.000758	7e-06	4e-05	2e-05	0.000286	5e-07	0.013	0	0.00873
65992-81	A16-BTW-MH1	ARGUS VI (Jan)	2018-01-25	21.1667	2.25	0.0333574	0.0220781	626.812	0.155049	25.6245	0.0471059	0.389811	0.0156588	0.0794196	0.0216664	1.00246	0.0008806	0.550312	0.0548715	0.0232394	0.0030166	0.0054997	0.0009827	0.042942	0.0014606	0.0043486	0.0002626	24.3856	0.0462613	99.7508	0.0526165	82.8802	0.153723	0.155143	3.13406e-17	NM-293D	0.0018994	4.9096e-07	2.02718	1.00025	0.000758	7e-06	4e-05	2e-05	0.000286	5e-07	0.013	0	0.00873
65992-82	A16-BTW-MH1	ARGUS VI (Jan)	2018-01-25	21.2667	2.25	0.0888272	0.0221606	2846.91	0.524278	16.0633	0.118919	0.2866	0.0145468	0.20547	0.0454403	1.00246	0.0008806	0.550075	0.0548704	0.0232394	0.0030166	0.0054997	0.0009827	0.042942	0.0014606	0.0043497	0.0002626	176.788	1.31005	99.7781	0.0361923	529.972	3.40984	3.41191	1.42346e-16	NM-293D	0.0018994	4.9096e-07	2.02734	1.00025	0.000758	7e-06	4e-05	2e-05	0.000286	5e-07	0.013	0	0.00873
65992-83	A16-BTW-MH1	ARGUS VI (Jan)	2018-01-25	21.3667	2.25	0.0299733	0.0203026	944.937	0.131052	42.8681	0.0403801	0.574575	0.0178148	0.223304	0.0311003	1.00246	0.0008806	0.549822	0.0548687	0.0232394	0.0030166	0.0054997	0.0009827	0.042942	0.0014606	0.0043508	0.0002627	21.9392	0.0223062	99.5934	0.0404561	74.7326	0.0744528	0.0768211	4.72468e-17	NM-293D	0.0018994	4.9096e-07	2.0275	1.00025	0.000758	7e-06	4e-05	2e-05	0.000286	5e-07	0.013	0	0.00873
65992-84	A16-BTW-MH1	ARGUS VI (Jan)	2018-01-25	21.4667	2.25	0.0600171	0.0150487	475.42	0.117414	21.8569	0.0421256	0.353213	0.0152332	0.0749137	0.0286255	1.00246	0.0008806	0.549559	0.0548665	0.0232394	0.0030166	0.0054997	0.0009827	0.042942	0.0014606	0.004352	0.0002628	21.6634	0.0434697	99.6596	0.0606028	73.8118	0.145164	0.146364	2.3771e-17	NM-293D	0.0018994	4.9096e-07	2.02767	1.00025	0.000758	7e-06	4e-05	2e-05	0.000286	5e-07	0.013	0	0.00873
65992-85	A16-BTW-MH1	ARGUS VI (Jan)	2018-01-25	21.6833	2.25	0.0251189	0.0070366	514.047	0.0626867	25.7305	0.0130777	0.315945	0.0024862	0.0360437	0.0053662	1.00246	0.0008806	0.54895	0.0548593	0.0232394	0.0030166	0.0054997	0.0009827	0.042942	0.0014606	0.0043545	0.0002629	19.9404	0.0111693	99.8798	0.0264543	68.0488	0.0374169	0.0412087	2.57023e-17	NM-293D	0.0018994	4.9096e-07	2.02804	1.00025	0.000758	7e-06	4e-05	2e-05	0.000286	5e-07	0.013	0	0.00873
65992-86	A16-BTW-MH1	ARGUS VI (Jan)	2018-01-25	21.7833	2.25	0.0582769	0.0226178	586.703	0.142387	26.8442	0.0454109	0.369266	0.0134758	0.122553	0.0296109	1.00246	0.0008806	0.548686	0.0548555	0.0232394	0.0030166	0.0054997	0.0009827	0.042942	0.0014606	0.0043555	0.000263	21.7325	0.0389335	99.4998	0.0632691	74.0427	0.13	0.131346	2.93352e-17	NM-293D	0.0018994	4.9096e-07	2.0282	1.00025	0.000758	7e-06	4e-05	2e-05	0.000286	5e-07	0.013	0	0.00873
65992-87	A16-BTW-MH1	ARGUS VI (Jan)	2018-01-25	22.0167	2.25	0.0393479	0.0068382	1113.32	0.0724505	55.7731	0.0146342	0.699119	0.0025397	0.111894	0.0053959	1.00246	0.0008806	0.548059	0.0548447	0.0232394	0.0030166	0.0054997	0.0009827	0.042942	0.0014606	0.0043578	0.0002631	19.9285	0.0057311	99.9027	0.0134426	68.0091	0.0191994	0.0258148	5.56661e-17	NM-293D	0.0018994	4.9096e-07	2.02858	1.00025	0.000758	7e-06	4e-05	2e-05	0.000286	5e-07	0.013	0	0.00873
65992-88	A16-BTW-MH1	ARGUS VI (Jan)	2018-01-25	22.1	2.25	0.0139995	0.0188746	446.499	0.0979287	19.9414	0.0389371	0.295308	0.012593	0.118837	0.0270899	1.00246	0.0008806	0.547789	0.0548394	0.0232394	0.0030166	0.0054997	0.0009827	0.042942	0.0014606	0.0043587	0.0002631	22.2528	0.0468979	99.4478	0.0816448	75.7792	0.156444	0.157616	2.23249e-17	NM-293D	0.0018994	4.9096e-07	2.02874	1.00025	0.000758	7e-06	4e-05	2e-05	0.000286	5e-07	0.013	0	0.00873
65992-89	A16-BTW-MH1	ARGUS VI (Jan)	2018-01-25	22.7167	2.25	0.0171204	0.0178017	647.681	0.15132	29.6431	0.0519036	0.432836	0.0135852	0.18084	0.0300894	1.00246	0.0008806	0.545981	0.0547962	0.0232394	0.0030166	0.0054997	0.0009827	0.042942	0.0014606	0.0043644	0.0002633	21.7791	0.0394632	99.7427	0.0517812	74.1982	0.131757	0.133091	3.23841e-17	NM-293D	0.0018994	4.9096e-07	2.02978	1.00025	0.000758	7e-06	4e-05	2e-05	0.000286	5e-07	0.013	0	0.00873
65992-90	A16-BTW-MH1	ARGUS VI (Jan)	2018-01-25	22.8167	2.25	0.0609065	0.0211255	392.176	0.0946415	18.2522	0.0314741	0.245003	0.015391	0.0875506	0.0195024	1.00246	0.0008806	0.545693	0.0547883	0.0232394	0.0030166	0.0054997	0.0009827	0.042942	0.0014606	0.0043651	0.0002634	21.4143	0.039831	99.7289	0.0734125	72.9799	0.133073	0.134352	1.96088e-17	NM-293D	0.0018994	4.9096e-07	2.02994	1.00025	0.000758	7e-06	4e-05	2e-05	0.000286	5e-07	0.013	0	0.00873
65992-91	A16-BTW-MH1	ARGUS VI (Jan)	2018-01-25	23.05	2.25	0.01309	0.0068801	709.24	0.0658519	35.8124	0.013507	0.448778	0.0024976	0.0693421	0.0050257	1.00246	0.0008806	0.545008	0.0547687	0.0232394	0.0030166	0.0054997	0.0009827	0.042942	0.0014606	0.0043669	0.0002634	19.7402	0.0082908	99.7451	0.0206156	67.3782	0.0277841	0.0326243	3.5462e-17	NM-293D	0.0018994	4.9096e-07	2.03031	1.00025	0.000758	7e-06	4e-05	2e-05	0.000286	5e-07	0.013	0	0.00873
65992-92	A16-BTW-MH1	ARGUS VI (Jan)	2018-01-25	23.2667	2.25	-0.0003187	0.0071549	586.727	0.0638818	29.313	0.012425	0.375052	0.0025796	0.0567645	0.0051263	1.00246	0.0008806	0.544312	0.0547479	0.0232394	0.0030166	0.0054997	0.0009827	0.042942	0.0014606	0.0043686	0.0002634	19.8284	0.0097516	99.1313	0.026962	67.6738	0.0326744	0.0369124	2.93363e-17	NM-293D	0.0018994	4.9096e-07	2.03069	1.00025	0.000758	7e-06	4e-05	2e-05	0.000286	5e-07	0.013	0	0.00873
65992-93	A16-BTW-MH1	ARGUS VI (Jan)	2018-01-25	23.3667	2.25	0.0670894	0.0169346	603.431	0.0967818	1.77895	0.0266575	0.0770827	0.0108593	0.0423336	0.0180294	1.00246	0.0008806	0.544025	0.054739	0.0232394	0.0030166	0.0054997	0.0009827	0.042942	0.0014606	0.0043692	0.0002635	338.791	5.07825	99.9017	0.0355096	909.442	10.7431	10.7447	3.01715e-17	NM-293D	0.0018994	4.9096e-07	2.03084	1.00025	0.000758	7e-06	4e-05	2e-05	0.000286	5e-07	0.013	0	0.00873
65992-94	A16-BTW-MH1	ARGUS VI (Jan)	2018-01-25	23.4667	2.25	0.0309839	0.0225088	661.246	0.143991	30.1329	0.0526788	0.437079	0.0197591	0.101805	0.0247255	1.00246	0.0008806	0.543721	0.0547295	0.0232394	0.0030166	0.0054997	0.0009827	0.042942	0.0014606	0.0043699	0.0002635	21.8736	0.0394201	99.7421	0.0485105	74.5137	0.13159	0.132937	3.30623e-17	NM-293D	0.0018994	4.9096e-07	2.031	1.00025	0.000758	7e-06	4e-05	2e-05	0.000286	5e-07	0.013	0	0.00873
65992-95	A16-BTW-MH1	ARGUS VI (Jan)	2018-01-25	23.55	2.25	0.227038	0.0399701	2901.49	0.547659	35.8995	0.0818766	0.634044	0.021932	-0.0024346	0.0630849	1.00246	0.0008806	0.543456	0.0547212	0.0232394	0.0030166	0.0054997	0.0009827	0.042942	0.0014606	0.0043705	0.0002635	80.5058	0.186189	99.6441	0.0424529	260.464	0.56149	0.564986	1.45074e-16	NM-293D	0.0018994	4.9096e-07	2.03114	1.00025	0.000758	7e-06	4e-05	2e-05	0.000286	5e-07	0.013	0	0.00873
65992-96	A16-BTW-MH1	ARGUS VI (Jan)	2018-01-25	23.6333	2.25	0.111647	0.021787	1569.97	0.196842	71.7167	0.0488689	0.975769	0.0123489	0.240938	0.027933	1.00246	0.0008806	0.543153	0.0547116	0.0232394	0.0030166	0.0054997	0.0009827	0.042942	0.0014606	0.0043711	0.0002635	21.8398	0.0156486	99.8292	0.0253488	74.4008	0.0522408	0.0555361	7.84986e-17	NM-293D	0.0018994	4.9096e-07	2.0313	1.00025	0.000758	7e-06	4e-05	2e-05	0.000286	5e-07	0.013	0	0.00873
65992-97	A16-BTW-MH1	ARGUS VI (Jan)	2018-01-25	23.7333	2.25	0.0101686	0.0219473	350.126	0.114429	17.0678	0.0485882	0.25662	0.0118555	0.0539112	0.0261317	1.00246	0.0008806	0.542857	0.0547021	0.0232394	0.0030166	0.0054997	0.0009827	0.042942	0.0014606	0.0043717	0.0002635	20.3998	0.0604475	99.5109	0.0876455	69.5873	0.202327	0.203095	1.75063e-17	NM-293D	0.0018994	4.9096e-07	2.03146	1.00025	0.000758	7e-06	4e-05	2e-05	0.000286	5e-07	0.013	0	0.00873
65992-98	A16-BTW-MH1	ARGUS VI (Jan)	2018-01-25	23.8333	2.25	0.0492862	0.0190004	130.441	0.0874645	5.73102	0.0368196	0.134378	0.0151672	0.0718431	0.0291696	1.00246	0.0008806	0.542548	0.0546922	0.0232394	0.0030166	0.0054997	0.0009827	0.042942	0.0014606	0.0043722	0.0002635	22.477	0.150849	98.8149	0.202043	76.5267	0.503006	0.503378	6.52207e-18	NM-293D	0.0018994	4.9096e-07	2.03162	1.00025	0.000758	7e-06	4e-05	2e-05	0.000286	5e-07	0.013	0	0.00873
65992-99	A16-BTW-MH1	ARGUS VI (Jan)	2018-01-26	0.2	2.25	0.232071	0.0386415	4831.11	0.712892	43.4695	0.115682	0.74507	0.0270295	0.0496985	0.0663785	1.00246	0.0008806	0.541341	0.0546531	0.0232394	0.0030166	0.0054997	0.0009827	0.042942	0.0014606	0.0043743	0.0002635	110.895	0.296332	99.8144	0.0280621	349.889	0.851041	0.855013	2.41556e-16	NM-293D	0.0018994	4.9096e-07	2.03224	1.00025	0.000758	7e-06	4e-05	2e-05	0.000286	5e-07	0.013	0	0.00873
66036-01	A16-BTW-MH2	ARGUS VI (Jan)	2018-02-22	7.73333	3	-0.0017192	0.0069351	158.879	0.0197797	8.17975	0.0107485	0.104439	0.0023557	-0.0032519	0.0048994	1.00251	0.0006418	0.183453	0.0051214	0.0265843	0.0028402	0.0057957	0.0008533	0.04476	0.0015877	0.0026077	5.03e-05	19.3723	0.0263043	99.8259	0.0361254	65.5495	0.0874307	0.0901255	7.94395e-18	NM-293F	0.001882	6.3935e-07	3.48543	1.00045	0.000758	7e-06	4e-05	2e-05	0.000286	5e-07	0.013	0	0.00873
66036-02	A16-BTW-MH2	ARGUS VI (Jan)	2018-02-22	8.53333	3	0.0763961	0.0201322	264.683	0.0713699	12.9466	0.0400797	0.18984	0.0153839	0.0066001	0.0195268	1.00251	0.0006418	0.183453	0.0051214	0.0265843	0.0028402	0.0057957	0.0008533	0.04476	0.0015877	0.0026077	5.03e-05	20.3607	0.0642929	99.6782	0.0669607	68.8319	0.213315	0.214546	1.32341e-17	NM-293F	0.001882	6.3935e-07	3.48773	1.00045	0.000758	7e-06	4e-05	2e-05	0.000286	5e-07	0.013	0	0.00873
66036-03	A16-BTW-MH2	ARGUS VI (Jan)	2018-02-22	8.63333	3	0.0923979	0.0165096	279.848	0.0855684	12.6955	0.0334335	0.197015	0.0155807	0.0151698	0.0231125	1.00251	0.0006418	0.183453	0.0051214	0.0265843	0.0028402	0.0057957	0.0008533	0.04476	0.0015877	0.0026077	5.03e-05	21.9504	0.0598354	99.6635	0.0761025	74.0987	0.197955	0.199486	1.39924e-17	NM-293F	0.001882	6.3935e-07	3.48801	1.00045	0.000758	7e-06	4e-05	2e-05	0.000286	5e-07	0.013	0	0.00873
66036-04	A16-BTW-MH2	ARGUS VI (Jan)	2018-02-22	8.85	3	0.0095468	0.007263	522.028	0.0336311	26.9005	0.0120813	0.332427	0.0025538	0.023133	0.0045538	1.00251	0.0006418	0.183453	0.0051214	0.0265843	0.0028402	0.0057957	0.0008533	0.04476	0.0015877	0.0026077	5.03e-05	19.2958	0.0091644	99.5219	0.016626	65.2954	0.0304651	0.0374563	2.61014e-17	NM-293F	0.001882	6.3935e-07	3.48864	1.00045	0.000758	7e-06	4e-05	2e-05	0.000286	5e-07	0.013	0	0.00873
66036-05	A16-BTW-MH2	ARGUS VI (Jan)	2018-02-22	9.13333	3	-0.0084748	0.0070852	381.654	0.0273793	19.6585	0.011377	0.242744	0.0024558	0.0272233	0.0053934	1.00251	0.0006418	0.183453	0.0051214	0.0265843	0.0028402	0.0057957	0.0008533	0.04476	0.0015877	0.0026077	5.03e-05	19.3547	0.011696	99.7823	0.0187069	65.4911	0.0388765	0.0445985	1.90827e-17	NM-293F	0.001882	6.3935e-07	3.48943	1.00045	0.000758	7e-06	4e-05	2e-05	0.000286	5e-07	0.013	0	0.00873
66036-06	A16-BTW-MH2	ARGUS VI (Jan)	2018-02-22	9.21667	3	0.0952882	0.0191228	1343.23	0.211838	12.3513	0.033584	0.208505	0.0142078	0.0003782	0.0223225	1.00251	0.0006418	0.183453	0.0051214	0.0265843	0.0028402	0.0057957	0.0008533	0.04476	0.0015877	0.0026077	5.03e-05	108.426	0.296282	99.753	0.0310943	339.919	0.847708	0.854234	6.71614e-17	NM-293F	0.001882	6.3935e-07	3.48969	1.00045	0.000758	7e-06	4e-05	2e-05	0.000286	5e-07	0.013	0	0.00873
66036-08	A16-BTW-MH2	ARGUS VI (Jan)	2018-02-22	9.58333	3	-0.0134048	0.0071908	162.507	0.0191224	8.36182	0.0106352	0.106888	0.0024145	-0.0022109	0.0051723	1.00251	0.0006418	0.183453	0.0051214	0.0265843	0.0028402	0.0057957	0.0008533	0.04476	0.0015877	0.0026077	5.03e-05	19.3517	0.0256962	99.6639	0.0396018	65.4811	0.0854125	0.0881635	8.12533e-18	NM-293F	0.001882	6.3935e-07	3.49072	1.00045	0.000758	7e-06	4e-05	2e-05	0.000286	5e-07	0.013	0	0.00873
66036-10	A16-BTW-MH2	ARGUS VI (Jan)	2018-02-22	9.85	3	0.0369337	0.0118845	94.1078	0.0201566	4.84552	0.0155302	0.0750643	0.0042401	0.020338	0.0108375	1.00251	0.0006418	0.183453	0.0051214	0.0265843	0.0028402	0.0057957	0.0008533	0.04476	0.0015877	0.0026077	5.03e-05	19.2986	0.0636892	99.4547	0.0804636	65.3047	0.211719	0.212838	4.70539e-18	NM-293F	0.001882	6.3935e-07	3.49152	1.00045	0.000758	7e-06	4e-05	2e-05	0.000286	5e-07	0.013	0	0.00873
66036-11	A16-BTW-MH2	ARGUS VI (Jan)	2018-02-22	10.0667	3	-0.0042461	0.007269	269.572	0.0159763	13.8847	0.0068949	0.176433	0.0023829	0.0138737	0.0046673	1.00251	0.0006418	0.183453	0.0051214	0.0265843	0.0028402	0.0057957	0.0008533	0.04476	0.0015877	0.0026077	5.03e-05	19.3363	0.0100331	99.6836	0.0160706	65.43	0.0333505	0.0398626	1.34786e-17	NM-293F	0.001882	6.3935e-07	3.49214	1.00045	0.000758	7e-06	4e-05	2e-05	0.000286	5e-07	0.013	0	0.00873
66036-16	A16-BTW-MH2	ARGUS VI (Jan)	2018-02-22	11.1333	3	0.0390946	0.017055	190.03	0.163287	9.19506	0.13124	0.144559	0.0157378	0.0329259	0.0264365	1.00251	0.0006418	0.183453	0.0051214	0.0265843	0.0028402	0.0057957	0.0008533	0.04476	0.0015877	0.0026077	5.03e-05	20.3047	0.302624	98.3342	0.428262	68.6463	1.00416	1.00442	9.50148e-18	NM-293F	0.001882	6.3935e-07	3.49518	1.00045	0.000758	7e-06	4e-05	2e-05	0.000286	5e-07	0.013	0	0.00873
66036-17	A16-BTW-MH2	ARGUS VI (Jan)	2018-02-22	11.2167	3	0.092027	0.0197002	107.576	0.0636747	3.30847	0.0307986	0.102549	0.014416	0.0478584	0.0259237	1.00251	0.0006418	0.183453	0.0051214	0.0265843	0.0028402	0.0057957	0.0008533	0.04476	0.0015877	0.0026077	5.03e-05	32.0436	0.306696	98.6159	0.225765	107.19	0.996474	0.997101	5.37881e-18	NM-293F	0.001882	6.3935e-07	3.49542	1.00045	0.000758	7e-06	4e-05	2e-05	0.000286	5e-07	0.013	0	0.00873
66036-18	A16-BTW-MH2	ARGUS VI (Jan)	2018-02-22	11.3	3	0.0974609	0.0208318	1809.23	0.172621	7.14658	0.0333631	0.0999857	0.0154408	0.0368293	0.0335621	1.00251	0.0006418	0.183453	0.0051214	0.0265843	0.0028402	0.0057957	0.0008533	0.04476	0.0015877	0.0026077	5.03e-05	252.878	1.18117	99.9353	0.0173508	712.574	2.75702	2.7643	9.04615e-17	NM-293F	0.001882	6.3935e-07	3.49566	1.00045	0.000758	7e-06	4e-05	2e-05	0.000286	5e-07	0.013	0	0.00873
66036-19	A16-BTW-MH2	ARGUS VI (Jan)	2018-02-22	11.5	3	0.0017129	0.0073819	52.653	0.0152901	2.62242	0.0107228	0.0357484	0.002251	-0.0052236	0.0048806	1.00251	0.0006418	0.183453	0.0051214	0.0265843	0.0028402	0.0057957	0.0008533	0.04476	0.0015877	0.0026077	5.03e-05	19.8487	0.0841575	98.9458	0.113981	67.1325	0.279482	0.280377	2.63265e-18	NM-293F	0.001882	6.3935e-07	3.49626	1.00045	0.000758	7e-06	4e-05	2e-05	0.000286	5e-07	0.013	0	0.00873
66036-20	A16-BTW-MH2	ARGUS VI (Jan)	2018-02-22	11.6	3	0.0725051	0.0199819	628.077	0.11851	3.24268	0.0442949	0.0919939	0.016746	0.0095611	0.0262269	1.00251	0.0006418	0.183453	0.0051214	0.0265843	0.0028402	0.0057957	0.0008533	0.04476	0.0015877	0.0026077	5.03e-05	193.227	2.64065	99.8089	0.0424346	567.76	6.67108	6.67314	3.14039e-17	NM-293F	0.001882	6.3935e-07	3.49651	1.00045	0.000758	7e-06	4e-05	2e-05	0.000286	5e-07	0.013	0	0.00873
66036-21	A16-BTW-MH2	ARGUS VI (Jan)	2018-02-22	11.6833	3	0.0652709	0.0213883	674.962	0.121738	6.19683	0.041871	0.142212	0.0152728	0.0267811	0.0279671	1.00251	0.0006418	0.183453	0.0051214	0.0265843	0.0028402	0.0057957	0.0008533	0.04476	0.0015877	0.0026077	5.03e-05	108.509	0.734452	99.6736	0.0425418	340.155	2.10111	2.10375	3.37481e-17	NM-293F	0.001882	6.3935e-07	3.49675	1.00045	0.000758	7e-06	4e-05	2e-05	0.000286	5e-07	0.013	0	0.00873
66036-22	A16-BTW-MH2	ARGUS VI (Jan)	2018-02-22	12.3667	3	0.0204048	0.0121196	48.4213	0.0263541	2.36576	0.0231229	0.0341365	0.0066463	0.015081	0.0135951	1.00251	0.0006418	0.183453	0.0051214	0.0265843	0.0028402	0.0057957	0.0008533	0.04476	0.0015877	0.0026077	5.03e-05	20.1693	0.200949	98.6272	0.195689	68.1967	0.666951	0.667338	2.42107e-18	NM-293F	0.001882	6.3935e-07	3.49876	1.00045	0.000758	7e-06	4e-05	2e-05	0.000286	5e-07	0.013	0	0.00873
66036-23	A16-BTW-MH2	ARGUS VI (Jan)	2018-02-22	12.6	3	0.0062272	0.0072131	84.0581	0.0132007	4.34711	0.0065105	0.0526906	0.0024978	0.000589	0.0048071	1.00251	0.0006418	0.183453	0.0051214	0.0265843	0.0028402	0.0057957	0.0008533	0.04476	0.0015877	0.0026077	5.03e-05	19.2235	0.0299098	99.5047	0.0445398	65.0549	0.0994413	0.101784	4.20291e-18	NM-293F	0.001882	6.3935e-07	3.49938	1.00045	0.000758	7e-06	4e-05	2e-05	0.000286	5e-07	0.013	0	0.00873
66036-24	A16-BTW-MH2	ARGUS VI (Jan)	2018-02-22	13.2833	3	0.0925215	0.0194631	312.239	0.0941471	3.69247	0.0364975	0.108271	0.0123618	0.0614577	0.0220174	1.00251	0.0006418	0.183453	0.0051214	0.0265843	0.0028402	0.0057957	0.0008533	0.04476	0.0015877	0.0026077	5.03e-05	84.2121	0.834136	99.638	0.0685502	269.293	2.48047	2.48193	1.56119e-17	NM-293F	0.001882	6.3935e-07	3.50138	1.00045	0.000758	7e-06	4e-05	2e-05	0.000286	5e-07	0.013	0	0.00873
66036-27	A16-BTW-MH2	ARGUS VI (Jan)	2018-02-22	15.7333	3	0.0120551	0.0071431	37.2057	0.0121288	1.89541	0.0135809	0.0272714	0.0026869	0.0039129	0.0048729	1.00251	0.0006418	0.183453	0.0051214	0.0465843	0.0080334	0.0057957	0.0008533	0.04476	0.0015877	0.0026077	5.03e-05	19.2334	0.141295	98.0701	0.160714	65.088	0.469756	0.470258	1.86028e-18	NM-293F	0.001882	6.3935e-07	3.50846	1.00045	0.000758	7e-06	4e-05	2e-05	0.000286	5e-07	0.013	0	0.00873
66036-28	A16-BTW-MH2	ARGUS VI (Jan)	2018-02-22	15.9333	3	-0.0146993	0.0079018	9.0664	0.0123442	0.435312	0.0136678	0.0088789	0.0027933	0.0023658	0.0060146	1.00251	0.0006418	0.183453	0.0051214	0.0465843	0.0080334	0.0057957	0.0008533	0.04476	0.0015877	0.0026077	5.03e-05	19.8788	0.64243	95.5275	0.736848	67.2325	2.13335	2.13347	4.5332e-19	NM-293F	0.001882	6.3935e-07	3.509	1.00045	0.000758	7e-06	4e-05	2e-05	0.000286	5e-07	0.013	0	0.00873
66036-29	A16-BTW-MH2	ARGUS VI (Jan)	2018-02-22	16.65	3	0.0163532	0.0192853	98.6091	0.0556202	1.36799	0.0357319	0.0619292	0.0176111	0.0543087	0.0248243	1.00251	0.0006418	0.183453	0.0051214	0.0265843	0.0028402	0.0057957	0.0008533	0.04476	0.0015877	0.0026077	5.03e-05	71.3585	1.87077	99.0407	0.222435	230.666	5.68176	5.68224	4.93046e-18	NM-293F	0.001882	6.3935e-07	3.5111	1.00045	0.000758	7e-06	4e-05	2e-05	0.000286	5e-07	0.013	0	0.00873
66036-30	A16-BTW-MH2	ARGUS VI (Jan)	2018-02-22	16.7333	3	0.0440632	0.0221178	97.5133	0.0414032	1.50181	0.0306138	0.0691374	0.0165783	0.0339873	0.0298243	1.00251	0.0006418	0.183453	0.0051214	0.0265843	0.0028402	0.0057957	0.0008533	0.04476	0.0015877	0.0026077	5.03e-05	63.9991	1.30988	98.6171	0.181043	208.177	4.02744	4.02799	4.87566e-18	NM-293F	0.001882	6.3935e-07	3.51134	1.00045	0.000758	7e-06	4e-05	2e-05	0.000286	5e-07	0.013	0	0.00873
66036-31	A16-BTW-MH2	ARGUS VI (Jan)	2018-02-22	16.8167	3	0.0445233	0.0211277	275.404	0.075365	0.882284	0.0269696	0.051391	0.0152684	0.0620353	0.0207996	1.00251	0.0006418	0.183453	0.0051214	0.0265843	0.0028402	0.0057957	0.0008533	0.04476	0.0015877	0.0026077	5.03e-05	310.753	9.50316	99.5815	0.0681432	842.909	20.6572	20.6585	1.37702e-17	NM-293F	0.001882	6.3935e-07	3.51159	1.00045	0.000758	7e-06	4e-05	2e-05	0.000286	5e-07	0.013	0	0.00873
66036-34	A16-BTW-MH2	ARGUS VI (Jan)	2018-02-23	7.81667	3	0.0096804	0.0135365	18.5437	0.0194448	0.917475	0.0227812	0.0259471	0.0086812	0.0034508	0.0135058	1.00251	0.0006418	0.183453	0.0051214	0.0265843	0.0028402	0.0057957	0.0008533	0.04476	0.0015877	0.0026077	5.03e-05	19.845	0.50276	98.2716	0.499046	67.1201	1.66965	1.6698	9.27187e-19	NM-293F	0.001882	6.3935e-07	3.55517	1.00045	0.000758	7e-06	4e-05	2e-05	0.000286	5e-07	0.013	0	0.00873
66036-35	A16-BTW-MH2	ARGUS VI (Jan)	2018-02-23	8.01667	3	0.0086687	0.0072122	45.6718	0.0128905	2.35505	0.0101538	0.0301394	0.0023679	0.0074435	0.0048064	1.00251	0.0006418	0.183453	0.0051214	0.0265843	0.0028402	0.0057957	0.0008533	0.04476	0.0015877	0.0026077	5.03e-05	19.2428	0.0860506	99.3136	0.120402	65.119	0.286083	0.286908	2.28359e-18	NM-293F	0.001882	6.3935e-07	3.55579	1.00045	0.000758	7e-06	4e-05	2e-05	0.000286	5e-07	0.013	0	0.00873
66036-36	A16-BTW-MH2	ARGUS VI (Jan)	2018-02-23	8.23333	4	-0.017142	0.0043911	27.401	0.028901	1.34688	0.0264731	0.0276561	0.0094123	0.0261257	0.0214079	1.00251	0.0006418	0.183453	0.0051214	0.0265843	0.0028402	0.0057957	0.0008533	0.04476	0.0015877	0.0026077	5.03e-05	19.7897	0.400225	97.3558	0.47067	66.9366	1.32926	1.32945	1.37005e-18	NM-293F	0.001882	6.3935e-07	3.5564	1.00045	0.000758	7e-06	4e-05	2e-05	0.000286	5e-07	0.013	0	0.00873
66036-38	A16-BTW-MH2	ARGUS VI (Jan)	2018-02-23	8.43333	4	0.0543265	0.0168966	33.4408	0.0310147	0.975541	0.0249964	0.027017	0.0125317	0.0101019	0.0266795	1.00251	0.0006418	0.183453	0.0051214	0.0265843	0.0028402	0.0057957	0.0008533	0.04476	0.0015877	0.0026077	5.03e-05	33.7118	0.875593	98.4115	0.423005	112.601	2.83645	2.8367	1.67204e-18	NM-293F	0.001882	6.3935e-07	3.55697	1.00045	0.000758	7e-06	4e-05	2e-05	0.000286	5e-07	0.013	0	0.00873
66036-39	A16-BTW-MH2	ARGUS VI (Jan)	2018-02-23	8.95	3	0.130471	0.0197649	589.924	0.134543	1.44669	0.0332044	0.074456	0.0139989	0.0574638	0.0220447	1.00251	0.0006418	0.183453	0.0051214	0.0265843	0.0028402	0.0057957	0.0008533	0.04476	0.0015877	0.0026077	5.03e-05	407.252	9.34957	99.9087	0.0419649	1041.5	18.2339	18.2359	2.94962e-17	NM-293F	0.001882	6.3935e-07	3.55851	1.00045	0.000758	7e-06	4e-05	2e-05	0.000286	5e-07	0.013	0	0.00873
66036-42	A16-BTW-MH2	ARGUS VI (Jan)	2018-02-23	10.1	4	0.0080335	0.0149795	30.0508	0.0205684	1.44601	0.0231248	0.0235208	0.0081178	0.021508	0.0190777	1.00251	0.0006418	0.183453	0.0051214	0.0265843	0.0028402	0.0057957	0.0008533	0.04476	0.0015877	0.0026077	5.03e-05	20.5243	0.333901	98.8429	0.298532	69.3747	1.10751	1.10775	1.50254e-18	NM-293F	0.001882	6.3935e-07	3.56186	1.00046	0.000758	7e-06	4e-05	2e-05	0.000286	5e-07	0.013	0	0.00873
66036-44	A16-BTW-MH2	ARGUS VI (Jan)	2018-02-23	10.3	4	0.0137858	0.0115649	16.8973	0.0154705	0.817159	0.0120426	0.0125785	0.0052915	0.0398719	0.0090215	1.00251	0.0006418	0.183453	0.0051214	0.0265843	0.0028402	0.0057957	0.0008533	0.04476	0.0015877	0.0026077	5.03e-05	20.2848	0.307907	98.1711	0.36471	68.58	1.02173	1.02199	8.44864e-19	NM-293F	0.001882	6.3935e-07	3.56244	1.00046	0.000758	7e-06	4e-05	2e-05	0.000286	5e-07	0.013	0	0.00873
66036-45	A16-BTW-MH2	ARGUS VI (Jan)	2018-02-23	12.2667	4	-0.017142	0.0043911	85.7852	0.0568644	1.26191	0.0323845	0.0339953	0.0205394	0.0209154	0.0210177	1.00251	0.0006418	0.183453	0.0051214	0.0265843	0.0028402	0.0057957	0.0008533	0.04476	0.0015877	0.0026077	5.03e-05	67.7898	1.74526	99.7734	0.209678	219.795	5.33214	5.3326	4.28926e-18	NM-293F	0.001882	6.3935e-07	3.56824	1.00046	0.000758	7e-06	4e-05	2e-05	0.000286	5e-07	0.013	0	0.00873
66036-46	A16-BTW-MH2	ARGUS VI (Jan)	2018-02-23	12.35	4	0.0546286	0.0210601	101.17	0.0417628	1.86543	0.0293483	0.0636489	0.0120304	0.0105157	0.0305918	1.00251	0.0006418	0.183453	0.0051214	0.0265843	0.0028402	0.0057957	0.0008533	0.04476	0.0015877	0.0026077	5.03e-05	53.1136	0.840579	97.9923	0.170049	174.398	2.63263	2.63324	5.05852e-18	NM-293F	0.001882	6.3935e-07	3.56848	1.00046	0.000758	7e-06	4e-05	2e-05	0.000286	5e-07	0.013	0	0.00873
66036-47	A16-BTW-MH2	ARGUS VI (Jan)	2018-02-23	12.65	4	0.0541437	0.0185847	420.465	0.0945102	1.75129	0.03599	0.0733045	0.0110624	-0.0184267	0.023368	1.00251	0.0006418	0.183453	0.0051214	0.0265843	0.0028402	0.0057957	0.0008533	0.04476	0.0015877	0.0026077	5.03e-05	239.554	4.92476	99.8289	0.0586278	681.206	11.6937	11.6953	2.10232e-17	NM-293F	0.001882	6.3935e-07	3.56937	1.00046	0.000758	7e-06	4e-05	2e-05	0.000286	5e-07	0.013	0	0.00873
66036-48	A16-BTW-MH2	ARGUS VI (Jan)	2018-02-23	12.7333	4	0.0641766	0.0213969	72.5553	0.0463067	1.59065	0.0321941	0.0683675	0.0136942	0.0401459	0.0308553	1.00251	0.0006418	0.183453	0.0051214	0.0265843	0.0028402	0.0057957	0.0008533	0.04476	0.0015877	0.0026077	5.03e-05	44.9132	0.915697	98.5211	0.245381	148.533	2.90871	2.90911	3.62777e-18	NM-293F	0.001882	6.3935e-07	3.56961	1.00046	0.000758	7e-06	4e-05	2e-05	0.000286	5e-07	0.013	0	0.00873
66036-50	A16-BTW-MH2	ARGUS VI (Jan)	2018-02-23	13.1167	4	0.0130272	0.0071233	63.5403	0.0136143	3.29381	0.0097495	0.0444101	0.0025437	-0.0074947	0.0053559	1.00251	0.0006418	0.183453	0.0051214	0.0265843	0.0028402	0.0057957	0.0008533	0.04476	0.0015877	0.0026077	5.03e-05	19.1782	0.0592701	99.5075	0.0905145	64.9045	0.197072	0.198259	3.17701e-18	NM-293F	0.001882	6.3935e-07	3.57072	1.00046	0.000758	7e-06	4e-05	2e-05	0.000286	5e-07	0.013	0	0.00873
66036-52	A16-BTW-MH2	ARGUS VI (Jan)	2018-02-23	13.75	4	0.0010987	0.0186625	118.25	0.0645776	1.51821	0.0373272	0.0403788	0.0155136	-0.0392428	0.0274463	1.00251	0.0006418	0.183453	0.0051214	0.0265843	0.0028402	0.0057957	0.0008533	0.04476	0.0015877	0.0026077	5.03e-05	77.2673	1.90242	99.2667	0.138585	248.524	5.72178	5.72232	5.9125e-18	NM-293F	0.001882	6.3935e-07	3.57257	1.00046	0.000758	7e-06	4e-05	2e-05	0.000286	5e-07	0.013	0	0.00873
66036-54	A16-BTW-MH2	ARGUS VI (Jan)	2018-02-23	14.2667	4	-0.0095189	0.0071792	17.3197	0.0117262	0.871599	0.0124207	0.0087146	0.0025201	-0.0005027	0.0050942	1.00251	0.0006418	0.183453	0.0051214	0.0465843	0.0080334	0.0057957	0.0008533	0.04476	0.0015877	0.0026077	5.03e-05	19.3674	0.283782	97.5524	0.336314	65.5335	0.943245	0.943498	8.65985e-19	NM-293F	0.001882	6.3935e-07	3.57408	1.00046	0.000758	7e-06	4e-05	2e-05	0.000286	5e-07	0.013	0	0.00873
66036-56	A16-BTW-MH2	ARGUS VI (Jan)	2018-02-23	14.4	4	0.0118301	0.0231747	43.5613	0.0327756	0.761842	0.0313004	0.0404737	0.0116341	0.0239442	0.0240863	1.00251	0.0006418	0.183453	0.0051214	0.0265843	0.0028402	0.0057957	0.0008533	0.04476	0.0015877	0.0026077	5.03e-05	55.6456	2.29701	97.3692	0.385525	182.311	7.16304	7.16329	2.17807e-18	NM-293F	0.001882	6.3935e-07	3.5745	1.00046	0.000758	7e-06	4e-05	2e-05	0.000286	5e-07	0.013	0	0.00873
66036-57	A16-BTW-MH2	ARGUS VI (Jan)	2018-02-23	15.1333	4	-0.0044326	0.0070377	29.3853	0.0137054	1.16556	0.0127653	0.019652	0.0021201	0.0014656	0.0048892	1.00251	0.0006418	0.183453	0.0051214	0.0465843	0.0080334	0.0057957	0.0008533	0.04476	0.0015877	0.0026077	5.03e-05	19.1906	0.230942	76.1803	0.380702	64.9457	0.767861	0.768167	1.46926e-18	NM-293F	0.001882	6.3935e-07	3.57668	1.00046	0.000758	7e-06	4e-05	2e-05	0.000286	5e-07	0.013	0	0.00873
66036-58	A16-BTW-MH2	ARGUS VI (Jan)	2018-02-23	15.2833	4	-0.0111074	0.0141489	302.611	0.0852337	2.37492	0.0346991	0.0736468	0.01258	0.0158572	0.0231963	1.00251	0.0006418	0.183453	0.0051214	0.0265843	0.0028402	0.0057957	0.0008533	0.04476	0.0015877	0.0026077	5.03e-05	126.338	1.84865	99.2017	0.0817218	390.464	5.14522	5.14661	1.51305e-17	NM-293F	0.001882	6.3935e-07	3.5771	1.00046	0.000758	7e-06	4e-05	2e-05	0.000286	5e-07	0.013	0	0.00873
66036-59	A16-BTW-MH2	ARGUS VI (Jan)	2018-02-23	15.4	4	0.0415948	0.011736	97.8346	0.0163093	4.84551	0.012431	0.0604319	0.004462	-0.0134225	0.0092087	1.00251	0.0006418	0.183453	0.0051214	0.0265843	0.0028402	0.0057957	0.0008533	0.04476	0.0015877	0.0026077	5.03e-05	20.0691	0.053136	99.4867	0.0667478	67.8643	0.176391	0.177837	4.89173e-18	NM-293F	0.001882	6.3935e-07	3.57742	1.00046	0.000758	7e-06	4e-05	2e-05	0.000286	5e-07	0.013	0	0.00873
66036-60	A16-BTW-MH2	ARGUS VI (Jan)	2018-02-23	15.4833	4	0.0888795	0.016452	53.7122	0.0313497	2.62715	0.0291788	0.0746689	0.0116241	-0.0229474	0.0242033	1.00251	0.0006418	0.183453	0.0051214	0.0265843	0.0028402	0.0057957	0.0008533	0.04476	0.0015877	0.0026077	5.03e-05	20.1872	0.232155	98.8287	0.298492	68.2563	0.770498	0.770834	2.68561e-18	NM-293F	0.001882	6.3935e-07	3.57767	1.00046	0.000758	7e-06	4e-05	2e-05	0.000286	5e-07	0.013	0	0.00873
66036-62	A16-BTW-MH2	ARGUS VI (Jan)	2018-02-23	15.7667	4	0.0013682	0.007074	17.4999	0.0145162	0.897908	0.0098852	0.0123219	0.0024251	0.0046641	0.0049672	1.00251	0.0006418	0.183453	0.0051214	0.0465843	0.0080334	0.0057957	0.0008533	0.04476	0.0015877	0.0026077	5.03e-05	19.1216	0.214157	98.199	0.215145	64.716	0.712142	0.712469	8.74993e-19	NM-293F	0.001882	6.3935e-07	3.57854	1.00046	0.000758	7e-06	4e-05	2e-05	0.000286	5e-07	0.013	0	0.00873
66036-64	A16-BTW-MH2	ARGUS VI (Jan)	2018-02-23	15.9667	4	0.0740845	0.0171406	37.3137	0.0360749	0.759844	0.0324798	0.0799661	0.0113367	0.0562661	0.0244046	1.00251	0.0006418	0.183453	0.0051214	0.0265843	0.0028402	0.0057957	0.0008533	0.04476	0.0015877	0.0026077	5.03e-05	47.885	2.05834	97.5535	0.436348	157.949	6.50476	6.50497	1.86569e-18	NM-293F	0.001882	6.3935e-07	3.57911	1.00046	0.000758	7e-06	4e-05	2e-05	0.000286	5e-07	0.013	0	0.00873
66036-65	A16-BTW-MH2	ARGUS VI (Jan)	2018-02-23	16.05	4	0.080078	0.0205701	368.881	0.0725868	1.74373	0.0300643	0.056868	0.0130663	0.0117267	0.0264607	1.00251	0.0006418	0.183453	0.0051214	0.0265843	0.0028402	0.0057957	0.0008533	0.04476	0.0015877	0.0026077	5.03e-05	210.985	3.6392	99.7822	0.0496384	612.082	8.97377	8.97551	1.8444e-17	NM-293F	0.001882	6.3935e-07	3.57936	1.00046	0.000758	7e-06	4e-05	2e-05	0.000286	5e-07	0.013	0	0.00873
66036-66	A16-BTW-MH2	ARGUS VI (Jan)	2018-02-23	16.1333	4	0.0469904	0.0207203	124.748	0.0689412	1.76563	0.026767	0.0913626	0.0110986	0.0062571	0.0240351	1.00251	0.0006418	0.183453	0.0051214	0.0265843	0.0028402	0.0057957	0.0008533	0.04476	0.0015877	0.0026077	5.03e-05	69.913	1.06558	99.0079	0.163092	226.27	3.24408	3.24488	6.23742e-18	NM-293F	0.001882	6.3935e-07	3.57961	1.00046	0.000758	7e-06	4e-05	2e-05	0.000286	5e-07	0.013	0	0.00873
66036-67	A16-BTW-MH2	ARGUS VI (Jan)	2018-02-23	16.2167	4	0.0527788	0.021065	117.516	0.0510208	1.18317	0.0316478	0.0922867	0.0135095	0.0636626	0.0270632	1.00251	0.0006418	0.183453	0.0051214	0.0265843	0.0028402	0.0057957	0.0008533	0.04476	0.0015877	0.0026077	5.03e-05	97.609	2.61787	98.3139	0.188317	308.705	7.61893	7.61954	5.87577e-18	NM-293F	0.001882	6.3935e-07	3.57985	1.00046	0.000758	7e-06	4e-05	2e-05	0.000286	5e-07	0.013	0	0.00873
66036-69	A16-BTW-MH2	ARGUS VI (Jan)	2018-02-23	16.4833	4	0.0047095	0.0181023	35.9951	0.0350064	1.25309	0.0328675	0.0917824	0.0140386	0.0425762	0.0274703	1.00251	0.0006418	0.183453	0.0051214	0.0265843	0.0028402	0.0057957	0.0008533	0.04476	0.0015877	0.0026077	5.03e-05	27.6631	0.742416	96.3674	0.55052	92.9013	2.43105	2.43125	1.79976e-18	NM-293F	0.001882	6.3935e-07	3.58065	1.00046	0.000758	7e-06	4e-05	2e-05	0.000286	5e-07	0.013	0	0.00873
66036-71	A16-BTW-MH2	ARGUS VI (Jan)	2018-02-23	16.8	4	0.0264324	0.0139832	18.284	0.0178582	0.888379	0.0163103	0.0295279	0.007028	0.0194226	0.0142248	1.00251	0.0006418	0.183453	0.0051214	0.0265843	0.0028402	0.0057957	0.0008533	0.04476	0.0015877	0.0026077	5.03e-05	20.1028	0.381707	97.7554	0.479366	67.976	1.26704	1.26724	9.14199e-19	NM-293F	0.001882	6.3935e-07	3.58159	1.00046	0.000758	7e-06	4e-05	2e-05	0.000286	5e-07	0.013	0	0.00873
66036-72	A16-BTW-MH2	ARGUS VI (Jan)	2018-02-23	16.9	4	0.038756	0.0195041	38.2764	0.0369054	1.72808	0.0351847	0.056406	0.0169644	0.0388695	0.0281655	1.00251	0.0006418	0.183453	0.0051214	0.0265843	0.0028402	0.0057957	0.0008533	0.04476	0.0015877	0.0026077	5.03e-05	21.4434	0.45201	96.8878	0.5332	72.4206	1.49677	1.49696	1.91382e-18	NM-293F	0.001882	6.3935e-07	3.58184	1.00046	0.000758	7e-06	4e-05	2e-05	0.000286	5e-07	0.013	0	0.00873
66036-73	A16-BTW-MH2	ARGUS VI (Jan)	2018-02-23	17.3667	4	0.0339411	0.022774	252.393	0.0731681	1.31531	0.0236937	0.0611312	0.0136803	-0.001173	0.0227177	1.00251	0.0006418	0.183453	0.0051214	0.0265843	0.0028402	0.0057957	0.0008533	0.04476	0.0015877	0.0026077	5.03e-05	191.173	3.44577	99.6773	0.0653844	562.563	8.72979	8.73134	1.26196e-17	NM-293F	0.001882	6.3935e-07	3.58325	1.00046	0.000758	7e-06	4e-05	2e-05	0.000286	5e-07	0.013	0	0.00873
66036-77	A16-BTW-MH2	ARGUS VI (Jan)	2018-02-23	17.9667	4	0.0164298	0.0215082	121.99	0.0705138	1.43636	0.0327668	0.0874748	0.013496	0.0465037	0.0273421	1.00251	0.0006418	0.183453	0.0051214	0.0265843	0.0028402	0.0057957	0.0008533	0.04476	0.0015877	0.0026077	5.03e-05	84.1552	1.92521	99.1346	0.173584	269.124	5.72552	5.72616	6.09949e-18	NM-293F	0.001882	6.3935e-07	3.58501	1.00046	0.000758	7e-06	4e-05	2e-05	0.000286	5e-07	0.013	0	0.00873
66036-78	A16-BTW-MH2	ARGUS VI (Jan)	2018-02-23	18.05	4	0.0491586	0.0219648	54.7098	0.0360531	1.16627	0.0331507	0.0323	0.0178324	0.0400075	0.0251789	1.00251	0.0006418	0.183453	0.0051214	0.0265843	0.0028402	0.0057957	0.0008533	0.04476	0.0015877	0.0026077	5.03e-05	46.1667	1.3203	98.47	0.309431	152.511	4.18483	4.18512	2.73549e-18	NM-293F	0.001882	6.3935e-07	3.58526	1.00046	0.000758	7e-06	4e-05	2e-05	0.000286	5e-07	0.013	0	0.00873
66036-82	A16-BTW-MH2	ARGUS VI (Jan)	2018-02-24	20.2333	4	0.0341939	0.0182239	16.5145	0.0259486	0.7954	0.0251755	0.0054399	0.0109254	0.0140512	0.020864	1.00251	0.0006418	0.183453	0.0051214	0.0265843	0.0028402	0.0057957	0.0008533	0.04476	0.0015877	0.0026077	5.03e-05	20.2616	0.657107	97.6689	0.700068	68.5031	2.18058	2.1807	8.25726e-19	NM-293F	0.001882	6.3935e-07	3.66336	1.00046	0.000758	7e-06	4e-05	2e-05	0.000286	5e-07	0.013	0	0.00873
66036-83	A16-BTW-MH2	ARGUS VI (Jan)	2018-02-24	20.45	4	0.0384479	0.0181864	260.274	0.075107	1.48986	0.0345951	0.0581589	0.010807	0.0325608	0.0246604	1.00251	0.0006418	0.183453	0.0051214	0.0265843	0.0028402	0.0057957	0.0008533	0.04476	0.0015877	0.0026077	5.03e-05	174.133	4.04587	99.7226	0.0774334	518.876	10.4977	10.4988	1.30137e-17	NM-293F	0.001882	6.3935e-07	3.66402	1.00046	0.000758	7e-06	4e-05	2e-05	0.000286	5e-07	0.013	0	0.00873
66036-84	A16-BTW-MH2	ARGUS VI (Jan)	2018-02-24	20.55	4	0.0561776	0.0221174	200.792	0.062287	1.34234	0.0368639	0.0535696	0.0135066	0.0355737	0.0254603	1.00251	0.0006418	0.183453	0.0051214	0.0265843	0.0028402	0.0057957	0.0008533	0.04476	0.0015877	0.0026077	5.03e-05	148.778	4.08823	99.5062	0.087983	451.877	11.0031	11.0039	1.00396e-17	NM-293F	0.001882	6.3935e-07	3.6643	1.00046	0.000758	7e-06	4e-05	2e-05	0.000286	5e-07	0.013	0	0.00873
66036-86	A16-BTW-MH2	ARGUS VI (Jan)	2018-02-24	20.8667	4	0.0950836	0.0204523	24.4945	0.0262036	1.1245	0.0324619	0.0547836	0.0139408	0.0170083	0.0227961	1.00251	0.0006418	0.183453	0.0051214	0.0265843	0.0028402	0.0057957	0.0008533	0.04476	0.0015877	0.0026077	5.03e-05	21.1193	0.623877	97.0353	0.610765	71.3472	2.06709	2.06723	1.22472e-18	NM-293F	0.001882	6.3935e-07	3.66526	1.00046	0.000758	7e-06	4e-05	2e-05	0.000286	5e-07	0.013	0	0.00873
66036-87	A16-BTW-MH2	ARGUS VI (Jan)	2018-02-24	20.9667	4	0.0612996	0.0170029	339.241	0.0924571	0.783066	0.0298279	0.0708713	0.0137377	0.0662044	0.028818	1.00251	0.0006418	0.183453	0.0051214	0.0265843	0.0028402	0.0057957	0.0008533	0.04476	0.0015877	0.0026077	5.03e-05	432.29	16.472	99.81	0.0535172	1089.69	31.2895	31.2908	1.69621e-17	NM-293F	0.001882	6.3935e-07	3.66555	1.00046	0.000758	7e-06	4e-05	2e-05	0.000286	5e-07	0.013	0	0.00873
66036-88	A16-BTW-MH2	ARGUS VI (Jan)	2018-02-24	21.05	4	0.0202477	0.016573	326.315	0.0614517	0.737695	0.0294888	0.0240013	0.0157288	0.0276204	0.0226433	1.00251	0.0006418	0.183453	0.0051214	0.0265843	0.0028402	0.0057957	0.0008533	0.04476	0.0015877	0.0026077	5.03e-05	441.468	17.6512	99.8398	0.0561262	1107.04	33.2132	33.2144	1.63158e-17	NM-293F	0.001882	6.3935e-07	3.66583	1.00046	0.000758	7e-06	4e-05	2e-05	0.000286	5e-07	0.013	0	0.00873
66036-89	A16-BTW-MH2	ARGUS VI (Jan)	2018-02-24	21.2167	4	0.003637	0.0095138	24.3297	0.0128222	1.19806	0.0086705	0.0208748	0.0042785	0.0060154	0.0082051	1.00251	0.0006418	0.183453	0.0051214	0.0265843	0.0028402	0.0057957	0.0008533	0.04476	0.0015877	0.0026077	5.03e-05	20.1254	0.150858	99.1904	0.19929	68.0512	0.500738	0.501252	1.21649e-18	NM-293F	0.001882	6.3935e-07	3.66631	1.00046	0.000758	7e-06	4e-05	2e-05	0.000286	5e-07	0.013	0	0.00873
66036-90	A16-BTW-MH2	ARGUS VI (Jan)	2018-02-24	21.3167	4	0.0583773	0.0181091	158.827	0.0470468	2.51416	0.0304856	0.0534241	0.011412	-0.0132653	0.0279464	1.00251	0.0006418	0.183453	0.0051214	0.0265843	0.0028402	0.0057957	0.0008533	0.04476	0.0015877	0.0026077	5.03e-05	62.8316	0.76459	99.5213	0.104262	204.584	2.35548	2.35639	7.94133e-18	NM-293F	0.001882	6.3935e-07	3.6666	1.00046	0.000758	7e-06	4e-05	2e-05	0.000286	5e-07	0.013	0	0.00873
66036-92	A16-BTW-MH2	ARGUS VI (Jan)	2018-02-24	21.4833	4	0.054865	0.017137	208.637	0.0613866	0.905983	0.0281808	0.0568885	0.013345	-0.0144388	0.0262947	1.00251	0.0006418	0.183453	0.0051214	0.0265843	0.0028402	0.0057957	0.0008533	0.04476	0.0015877	0.0026077	5.03e-05	229.4	7.1386	99.6688	0.0951905	656.936	17.1767	17.1777	1.04319e-17	NM-293F	0.001882	6.3935e-07	3.6671	1.00046	0.000758	7e-06	4e-05	2e-05	0.000286	5e-07	0.013	0	0.00873
66036-93	A16-BTW-MH2	ARGUS VI (Jan)	2018-02-24	21.5667	4	0.0443595	0.018367	75.4185	0.049428	1.28308	0.0329491	0.0142584	0.0159626	0.0565609	0.0229965	1.00251	0.0006418	0.183453	0.0051214	0.0265843	0.0028402	0.0057957	0.0008533	0.04476	0.0015877	0.0026077	5.03e-05	58.1121	1.4986	98.9135	0.234681	189.986	4.65371	4.65411	3.77093e-18	NM-293F	0.001882	6.3935e-07	3.66739	1.00046	0.000758	7e-06	4e-05	2e-05	0.000286	5e-07	0.013	0	0.00873
[truncated: 626 more rows]
[truncated: 1 more columns]
